# Supplementary material for: Radical heteroarylation of unactivated remote C(sp3)–H bonds via intramolecular heteroaryl migration
Source: Royal Society of Chemistry journal article supplement (doi:10.1039/d1qo01209f), 2021-01-01

## Supporting Information

### Radical heteroarylation of unactivated remote C(sp<sup>3</sup>)-H bonds via intramolecular heteroaryl migration

Zhu Cao,<sup>‡a</sup> Huihui Zhang,<sup>‡a</sup> Xinxin Wu,<sup>a</sup> Yahong Li<sup>\*a</sup> and Chen Zhu<sup>\*ab</sup>

<sup>a</sup> Key Laboratory of Organic Synthesis of Jiangsu Province, College of Chemistry, Chemical Engineering and Materials Science, Soochow University, 199 Ren-Ai Road, Suzhou, Jiangsu 215123, China

<sup>b</sup> Key Laboratory of Synthetic Chemistry of Natural Substances, Shanghai Institute of Organic Chemistry, Chinese Academy of Sciences, 345 Lingling Road, Shanghai 200032, China.

<sup>‡</sup> These authors contributed equally to this paper.

Correspondence to: [chzhu@suda.edu.cn](mailto:chzhu@suda.edu.cn), [liyahong@suda.edu.cn](mailto:liyahong@suda.edu.cn)

### Contents

|                                                                    |     |
|--------------------------------------------------------------------|-----|
| 1. General experimental details                                    | S2  |
| 2. General procedures for synthesis of starting materials          | S2  |
| 3. General procedures for synthesis of <b>2</b>                    | S3  |
| 4. Characterization of starting materials and products             | S4  |
| 5. Synthetic applications                                          | S19 |
| 6. <sup>1</sup> H, <sup>13</sup> C and <sup>19</sup> F NMR spectra | S21 |

## 1. General experimental details

Commercially available reagents were used without further purification. THF was distilled from sodium. Infrared (FT-IR) spectra were recorded on a BRUKER VERTEX 70,  $\nu_{\max}$  in  $\text{cm}^{-1}$ .  $^1\text{H}$ -NMR spectra were recorded on a BRUKER AVANCE III HD (400 MHz) spectrometer. Chemical shifts are reported in ppm from tetramethylsilane with the solvent resonance as internal standard ( $\text{CDCl}_3$ :  $\delta$  7.26). Data are reported as follows: chemical shift, multiplicity (s = singlet, d = doublet, t = triplet, dd = doublet of doublets, q = quadruplet, br = broad, m = multiplet), coupling constants (Hz) and integration.  $^{13}\text{C}$ -NMR spectra were recorded on a BRUKER AVANCE III HD (100 MHz) spectrometer with complete proton decoupling. Chemical shifts are reported in ppm from tetramethylsilane with the solvent resonance as the internal standard ( $\text{CDCl}_3$ :  $\delta$  77.00).  $^{19}\text{F}$ -NMR spectra were recorded on a BRUKER AVANCE III HD (376 MHz) spectrometer. Mass spectra were measured with an Agilent Technologies 6120 Quadrupole LC/MS. High resolution mass spectrometry (HRMS) were measured with a GCT Premier<sup>TM</sup> and BRUKER micrOTF-Q III. Melting points were measured using INESA WRR and values are uncorrected.

## 2. General procedures for synthesis of starting materials

The starting materials **1a-1v**, **1z-1ai** were prepared according to **General Procedure A**.

The starting materials **1w-1y** were prepared according to **General Procedure B**.

### General Procedure A

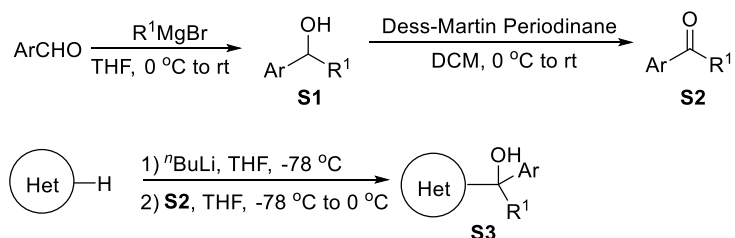

To a solution of freshly prepared Grignard reagent (1.2 equiv.) in THF was added a solution of aryl formaldehyde (1.0 equiv.) in THF dropwise at 0 °C under  $\text{N}_2$ . After ambient temperature was reached, the reaction mixture was stirred for 2 h, and quenched with saturated  $\text{NH}_4\text{Cl}$  solution. The resulting mixture was extracted with EtOAc. The combined organic extracts were washed by brine, dried over anhydrous  $\text{Na}_2\text{SO}_4$ , filtered, concentrate, and purified by flash column chromatography on silica gel (eluent: EtOAc/Petroleum ether) to give **S1**.

Dess-Martin periodinane (1.4 equiv.) was added to a solution of **S1** (1.0 equiv.) in DCM at 0 °C. The reaction was stirred in ice bath overnight, during which time the reaction was warmed up to room temperature. The reaction was quenched with saturated  $\text{NaHCO}_3$  solution and filtered with celite. The resulting mixture was extracted with DCM. The combined organic extracts were washed by brine, dried over anhydrous  $\text{Na}_2\text{SO}_4$ , filtered, concentrated, and purified by flash column chromatography on silica gel (eluent: EtOAc/Petroleum ether) to give **S2**.

To a solution of heteroaryls (1.2 equiv.) in THF was slowly added  $n$ BuLi (1.2 equiv., 2.5 M in THF) at  $-78$  °C under  $N_2$ , then the mixture was stirred for 1 h. A solution of **S2** (1.0 equiv) in THF was added to the mixture dropwise at  $-78$  °C. The mixture was gradually warmed to  $0$  °C. After the reaction was complete, the mixture was quenched with saturated  $NH_4Cl$  solution. The resulting mixture was extracted with EtOAc. The combined organic extracts were washed by brine, dried over anhydrous  $Na_2SO_4$ , filtered, concentrated, and purified by flash column chromatography on silica gel (eluent: EtOAc/Petroleum ether) to give **S3**.

### General Procedure B

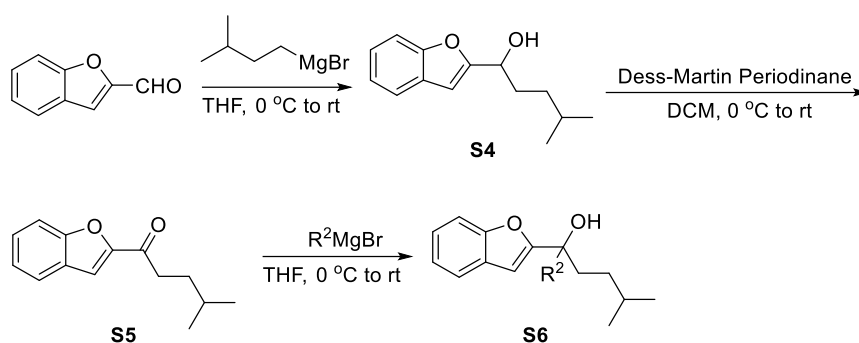

To a solution of freshly prepared Grignard reagent (1.2 equiv.) in THF was added a solution of 2-benzofuran-3-carboxaldehyde (1.0 equiv.) in THF dropwise at  $0$  °C under  $N_2$ . After ambient temperature was reached, the reaction mixture was stirred for 2 h, and quenched with saturated  $NH_4Cl$  solution. The resulting mixture was extracted with EtOAc. The combined organic extracts were washed by brine, dried over anhydrous  $Na_2SO_4$ , filtered, concentrate, and purified by flash column chromatography on silica gel (eluent: EtOAc/Petroleum ether) to give **S4**.

Dess-Martin periodinane (1.4 equiv.) was added to a solution of **S4** (1.0 equiv.) in DCM at  $0$  °C. The reaction was stirred in the ice bath overnight, during which time the reaction warmed up to room temperature. The reaction was quenched with saturated  $NaHCO_3$  solution and filtered with celite. The resulting mixture was extracted with DCM. The combined organic extracts were washed by brine, dried over anhydrous  $Na_2SO_4$ , filtered, concentrated, and purified by flash column chromatography on silica gel (eluent: EtOAc/Petroleum ether) to give **S5**.

To a solution of **S5** (1.0 equiv.) in THF was added a solution of Grignard reagent (1.5 equiv.) in THF dropwise at  $0$  °C under  $N_2$ . After ambient temperature was reached, the reaction mixture was stirred for 2 h, and quenched with saturated  $NH_4Cl$  solution. The resulting mixture was extracted with EtOAc. The combined organic extracts were washed by brine, dried over anhydrous  $Na_2SO_4$ , filtered, concentrated, and purified by flash column chromatography on silica gel (eluent: EtOAc/Petroleum ether) to give **S6**.

## 3. General procedures for synthesis of 2

PIDA (iodobenzene diacetate) (0.8 mmol, 4.0 equiv.) and NaN<sub>3</sub> (0.8 mmol, 4.0 equiv.) were loaded in a reaction vial which was subjected to evacuation/ flushing with N<sub>2</sub> three times and was added to a solution of tertiary alcohol **1** (0.2 mmol, 1.0 equiv.) in MeCN (2.5 mL). The reaction was stirred at 80 °C for 12 h. Afterwards the reaction was quenched with saturated Na<sub>2</sub>S<sub>2</sub>O<sub>3</sub> solution and extracted with EtOAc. The combined organic extracts were washed by brine, dried over anhydrous Na<sub>2</sub>SO<sub>4</sub>, filtered, concentrated, and purified by flash column chromatography on silica gel to give the product. (PIDA (1.2 mmol, 6.0 equiv.) and NaN<sub>3</sub> (1.2 mmol, 6.0 equiv.) were used for **2g**).

## 4. Characterization of starting materials and products

### a. New starting materials

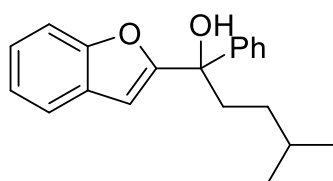

**1a**: yellow oil. <sup>1</sup>H NMR (400 MHz, CDCl<sub>3</sub>) δ 7.54-7.50 (m, 1H), 7.49-7.45 (m, 2H), 7.42-7.39 (m, 1H), 7.36-7.30 (m, 2H), 7.29-7.17 (m, 3H), 6.63 (d, *J* = 0.8 Hz, 1H), 2.53 (br, 1H), 2.39-2.30 (m, 1H), 2.26-2.17 (m, 1H), 1.60-1.48 (m, 1H), 1.33-1.23 (m, 1H), 1.21-1.10 (m, 1H), 0.87 (d, *J* = 6.8 Hz, 3H), 0.86 (d, *J* = 6.8 Hz, 3H); <sup>13</sup>C NMR (100 MHz, CDCl<sub>3</sub>) δ 161.4, 154.7, 144.0, 128.1, 128.1, 127.3, 125.6, 124.0, 122.8, 121.0, 111.3, 103.0, 75.9, 38.8, 32.3, 28.2, 22.5, 22.5. FT-IR: ν (cm<sup>-1</sup>) δ 3353, 2972, 2945, 2160, 1976, 1683, 1580, 1471, 1357, 1272, 1165. HRMS [ESI] calcd for C<sub>20</sub>H<sub>22</sub>NaO<sub>2</sub> [M+Na]<sup>+</sup> 317.1512, found 317.1519.

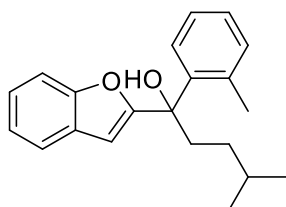

**1b**: yellow oil. <sup>1</sup>H NMR (400 MHz, CDCl<sub>3</sub>) δ 7.60-7.56 (m, 1H), 7.56-7.52 (m, 1H), 7.45-7.40 (m, 1H), 7.29-7.19 (m, 4H), 7.17-7.12 (m, 1H), 6.60 (d, *J* = 0.8 Hz, 1H), 2.48-2.34 (m, 2H), 2.22 (s, 3H), 1.63-1.51 (m, 1H), 1.39-1.29 (m, 1H), 1.15-1.05 (m, 1H), 0.91 (d, *J* = 6.8 Hz, 3H), 0.89 (d, *J* = 6.8 Hz, 3H); <sup>13</sup>C NMR (100 MHz, CDCl<sub>3</sub>) δ 161.4, 154.5, 141.0, 135.9, 132.2, 128.1, 127.6, 126.9, 125.6, 124.1, 122.8, 121.1, 111.4, 103.2, 76.0, 36.6, 32.3, 28.3, 22.6, 22.5, 21.3. FT-IR: ν (cm<sup>-1</sup>) δ 2954, 1577, 1384, 1338, 1250, 1173, 1067, 1033, 1006. HRMS [ESI] calcd for C<sub>21</sub>H<sub>24</sub>NaO<sub>2</sub> [M+Na]<sup>+</sup> 331.1669, found 331.1678.

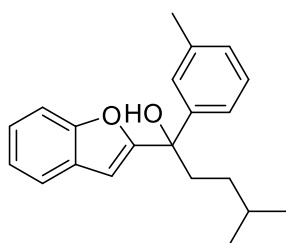

**1c**: yellow oil. <sup>1</sup>H NMR (400 MHz, CDCl<sub>3</sub>) δ 7.56-7.52 (m, 1H), 7.46-7.40 (m, 1H), 7.32 (s, 1H), 7.29-7.18 (m, 4H), 7.12-7.07 (m, 1H), 6.65 (d, *J* = 0.8 Hz, 1H), 2.54 (s, 1H), 2.40-2.31 (m, 1H), 2.36 (s, 3H), 2.26-2.17 (m, 1H), 1.62-1.50 (m, 1H), 1.35-1.13 (m, 2H), 0.90 (d, *J* = 6.4 Hz, 3H), 0.88 (d, *J* = 6.8 Hz, 3H); <sup>13</sup>C NMR (100 MHz, CDCl<sub>3</sub>) δ 161.5, 154.7, 143.9, 137.7, 128.1, 128.1, 128.0, 126.2, 124.0, 122.7, 121.0, 111.3, 102.9, 75.9, 38.8, 32.3, 28.2, 22.5, 22.5, 21.6. FT-IR: ν (cm<sup>-1</sup>) δ 3676, 2955, 1772, 1684, 1608, 1576, 1489, 1436, 1386, 1251, 1067. HRMS [ESI] calcd for C<sub>21</sub>H<sub>24</sub>NaO<sub>2</sub> [M+Na]<sup>+</sup> 331.1669, found 331.1670.

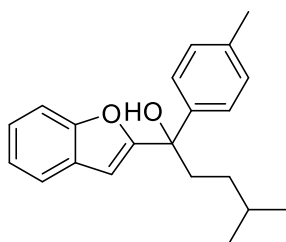

**1d:** yellow oil.  $^1\text{H}$  NMR (400 MHz,  $\text{CDCl}_3$ )  $\delta$  7.55-7.51 (m, 1H), 7.44-7.40 (m, 1H), 7.38-7.34 (m, 2H), 7.25-7.18 (m, 2H), 7.18-7.13 (m, 2H), 6.63 (s, 1H), 2.51 (s, 1H), 2.39-2.29 (m, 1H), 2.34 (s, 3H), 2.26-2.16 (m, 1H), 1.61-1.50 (m, 1H), 1.34-1.13 (m, 2H), 0.89 (d,  $J = 6.0$  Hz, 3H), 0.87 (d,  $J = 6.4$  Hz, 3H);  $^{13}\text{C}$  NMR (100 MHz,  $\text{CDCl}_3$ )  $\delta$  161.6, 154.7, 141.1, 136.9, 128.8, 128.1, 125.5, 124.0, 122.7, 121.0, 111.3, 102.9, 75.8, 38.8, 32.3, 28.3, 22.6, 22.5, 21.0. FT-IR:  $\nu$  ( $\text{cm}^{-1}$ )  $\delta$  3649, 2955, 2363, 1749, 1684, 1636, 1569, 1508, 1473, 1396, 1250, 1114. HRMS [ESI] calcd for  $\text{C}_{21}\text{H}_{24}\text{NaO}_2$  [ $\text{M}+\text{Na}$ ] $^+$  331.1669, found 331.1672.

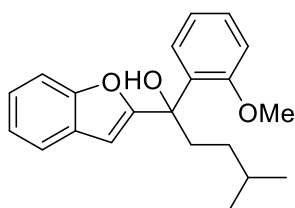

**1e:** white solid, m.p. 80-81 °C.  $^1\text{H}$  NMR (400 MHz,  $\text{CDCl}_3$ )  $\delta$  7.53-7.49 (m, 1H), 7.42 (d,  $J = 7.6$  Hz, 1H), 7.32-7.23 (m, 2H), 7.23-7.14 (m, 2H), 6.99-6.94 (m, 1H), 6.89 (d,  $J = 8.4$  Hz, 1H), 6.58 (s, 1H), 4.87 (s, 1H), 3.74 (s, 3H), 2.45-2.30 (m, 2H), 1.63-1.52 (m, 1H), 1.45-1.34 (m, 1H), 1.33-1.22 (m, 1H), 0.90 (d,  $J = 6.0$  Hz, 3H), 0.89 (d,  $J = 6.0$  Hz, 3H);  $^{13}\text{C}$  NMR (100 MHz,  $\text{CDCl}_3$ )  $\delta$  161.7, 157.1, 154.6, 131.6, 128.8, 128.4, 127.6, 123.5, 122.5, 121.0, 120.8, 111.8, 111.2, 102.5, 76.1, 55.5, 36.8, 32.5, 28.3, 22.6, 22.5. FT-IR:  $\nu$  ( $\text{cm}^{-1}$ )  $\delta$  3395, 2931, 2160, 1976, 1581, 1433, 1371, 1257, 1174, 1092. HRMS [ESI] calcd for  $\text{C}_{21}\text{H}_{24}\text{NaO}_3$  [ $\text{M}+\text{Na}$ ] $^+$  347.1618, found 347.1619.

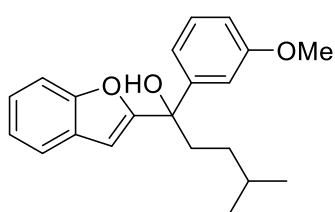

**1f:** yellow oil.  $^1\text{H}$  NMR (400 MHz,  $\text{CDCl}_3$ )  $\delta$  7.52 (d,  $J = 7.6$  Hz, 1H), 7.41 (d,  $J = 8.0$  Hz, 1H), 7.26-7.16 (m, 3H), 7.10 (s, 1H), 7.06-7.02 (m, 1H), 6.80 (dd,  $J = 8.0, 2.0$  Hz, 1H), 6.63 (s, 1H), 3.78 (s, 3H), 2.67 (br, 1H), 2.39-2.29 (m, 1H), 2.25-2.16 (m, 1H), 1.60-1.49 (m, 1H), 1.35-1.25 (m, 1H), 1.23-1.12 (m, 1H), 0.88 (d,  $J = 6.8$  Hz, 3H), 0.87 (d,  $J = 6.8$  Hz, 3H);  $^{13}\text{C}$  NMR (100 MHz,  $\text{CDCl}_3$ )  $\delta$  161.3, 159.5, 154.7, 145.7, 129.1, 128.1, 124.0, 122.7, 121.0, 118.1, 112.4, 111.7, 111.3, 102.9, 75.8, 55.2, 38.8, 32.2, 28.2, 22.5, 22.5. FT-IR:  $\nu$  ( $\text{cm}^{-1}$ )  $\delta$  3432, 2954, 2159, 1600, 1486, 1432, 1367, 1289, 1164, 1049. HRMS [ESI] calcd for  $\text{C}_{21}\text{H}_{24}\text{NaO}_3$  [ $\text{M}+\text{Na}$ ] $^+$  347.1618, found 347.1611.

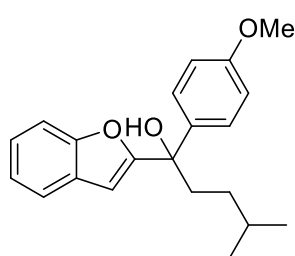

**1g:** yellow oil.  $^1\text{H}$  NMR (400 MHz,  $\text{CDCl}_3$ )  $\delta$  7.49-7.45 (m, 1H), 7.38-7.32 (m, 3H), 7.21-7.12 (m, 2H), 6.84-6.78 (m, 2H), 6.56 (s, 1H), 3.71 (s, 3H), 2.68 (s, 1H), 2.34-2.24 (m, 1H), 2.21-2.11 (m, 1H), 1.56-1.44 (m, 1H), 1.28-1.09 (m, 2H), 0.84 (d,  $J = 5.6$  Hz, 3H), 0.83 (d,  $J = 6.0$  Hz, 3H);  $^{13}\text{C}$  NMR (100 MHz,  $\text{CDCl}_3$ )  $\delta$  161.7, 158.7, 154.7, 136.2, 128.1, 126.8, 123.9, 122.7, 120.9, 113.4, 111.2, 102.8, 75.6, 55.1, 38.8, 32.3, 28.2, 22.5, 22.5. FT-IR:  $\nu$  ( $\text{cm}^{-1}$ )  $\delta$  2954, 2360, 1610, 1510, 1455, 1367, 1303, 1249, 1175, 1068. HRMS [ESI] calcd for  $\text{C}_{21}\text{H}_{24}\text{NaO}_3$  [ $\text{M}+\text{Na}$ ] $^+$  347.1618, found 347.1617.

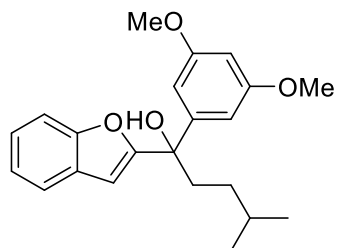

**1h**: yellow oil.  $^1\text{H}$  NMR (400 MHz,  $\text{CDCl}_3$ )  $\delta$  7.57-7.53 (m, 1H), 7.44 (d,  $J = 8.0$  Hz, 1H), 7.29-7.20 (m, 2H), 6.73-6.70 (m, 2H), 6.67 (s, 1H), 6.43-6.40 (m, 1H), 3.79 (s, 6H), 2.76 (s, 1H), 2.41-2.31 (m, 1H), 2.28-2.18 (m, 1H), 1.63-1.52 (m, 1H), 1.40-1.29 (m, 1H), 1.27-1.16 (m, 1H), 0.92 (d,  $J = 6.8$  Hz, 3H), 0.90 (d,  $J = 6.8$  Hz, 3H);  $^{13}\text{C}$  NMR (100 MHz,  $\text{CDCl}_3$ )  $\delta$  161.2, 160.6, 154.7, 146.6, 128.1, 124.0, 122.7, 121.0, 111.2, 104.1, 102.9, 98.9, 75.9, 55.2, 38.8, 32.2, 28.2, 22.5, 22.5. FT-IR:  $\nu$  ( $\text{cm}^{-1}$ )

$\delta$  3458, 2954, 2159, 1977, 1595, 1454, 1384, 1291, 1055. HRMS [ESI] calcd for  $\text{C}_{22}\text{H}_{26}\text{NaO}_4$   $[\text{M}+\text{Na}]^+$  377.1723, found 377.1716.

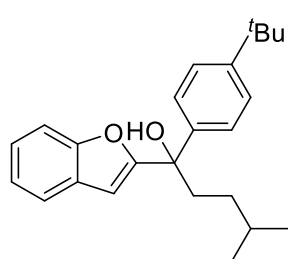

**1i**: yellow oil.  $^1\text{H}$  NMR (400 MHz,  $\text{CDCl}_3$ )  $\delta$  7.57-7.53 (m, 1H), 7.46-7.35 (m, 5H), 7.28-7.19 (m, 2H), 6.66 (s, 1H), 2.58 (s, 1H), 2.42-2.32 (m, 1H), 2.28-2.18 (m, 1H), 1.64-1.52 (m, 1H), 1.33 (s, 9H), 1.31-1.23 (m, 2H), 0.91 (d,  $J = 6.8$  Hz, 3H), 0.90 (d,  $J = 6.4$  Hz, 3H);  $^{13}\text{C}$  NMR (100 MHz,  $\text{CDCl}_3$ )  $\delta$  161.6, 154.8, 150.2, 141.2, 128.2, 125.3, 125.1, 123.9, 122.7, 121.0, 111.3, 102.9, 75.9, 38.8, 34.4, 32.4, 31.3, 28.3, 22.5. FT-IR:  $\nu$  ( $\text{cm}^{-1}$ )  $\delta$  3546, 2955, 1780, 1668, 1510,

1403, 1305, 1215, 1133, 1068. HRMS [ESI] calcd for  $\text{C}_{24}\text{H}_{30}\text{NaO}_2$   $[\text{M}+\text{Na}]^+$  373.2138, found 373.2142.

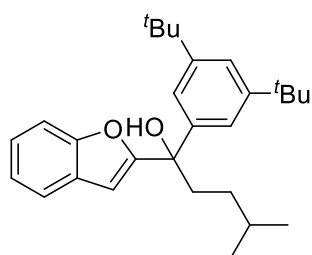

**1j**: yellow oil.  $^1\text{H}$  NMR (400 MHz,  $\text{CDCl}_3$ )  $\delta$  7.56-7.51 (m, 1H), 7.44 (d,  $J = 7.6$  Hz, 1H), 7.37 (s, 3H), 7.27-7.18 (m, 2H), 6.61 (s, 1H), 2.61 (s, 1H), 2.42-2.33 (m, 1H), 2.29-2.19 (m, 1H), 1.62-1.51 (m, 1H), 1.36-1.21 (m, 2H), 1.32 (s, 18H), 0.90 (d,  $J = 6.8$  Hz, 3H), 0.88 (d,  $J = 6.4$  Hz, 3H);  $^{13}\text{C}$  NMR (100 MHz,  $\text{CDCl}_3$ )  $\delta$  161.7, 154.8, 150.4, 143.1, 128.2, 123.9, 122.6, 121.2, 121.0, 119.9, 111.2, 103.0, 76.5, 39.0, 34.9, 32.6, 31.5, 28.2, 22.6, 22.5. FT-IR:  $\nu$  ( $\text{cm}^{-1}$ )

$\delta$  3355, 2954, 2160, 1712, 1598, 1469, 1384, 1252, 1152, 1092. HRMS [ESI] calcd for  $\text{C}_{28}\text{H}_{38}\text{NaO}_2$   $[\text{M}+\text{Na}]^+$  429.2764, found 429.2755.

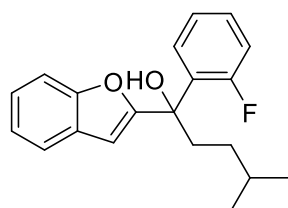

**1k**: yellow solid, m.p. 75-76 °C.  $^1\text{H}$  NMR (400 MHz,  $\text{CDCl}_3$ )  $\delta$  7.66-7.60 (m, 1H), 7.51-7.47 (m, 1H), 7.38 (d,  $J = 8.0$  Hz, 1H), 7.27-7.10 (m, 4H), 6.97 (dd,  $J = 11.6, 8.0$  Hz, 1H), 6.58 (s, 1H), 2.89 (s, 1H), 2.54-2.44 (m, 1H), 2.43-2.33 (m, 1H), 1.60-1.49 (m, 1H), 1.41-1.30 (m, 1H), 1.14-1.02 (m, 1H), 0.88 (d,  $J = 6.8$  Hz, 3H), 0.86 (d,  $J = 6.8$  Hz, 3H);  $^{13}\text{C}$  NMR (100 MHz,  $\text{CDCl}_3$ )  $\delta$  160.3, 159.7 (d,  $J_{\text{C-F}} =$

245.3 Hz), 154.5, 130.5 (d,  $J_{\text{C-F}} = 10.9$  Hz), 129.4 (d,  $J_{\text{C-F}} = 8.5$  Hz), 128.2 (d,  $J_{\text{C-F}} = 3.3$  Hz), 128.1, 124.1, 123.9 (d,  $J_{\text{C-F}} = 3.2$  Hz), 122.7, 121.1, 116.0 (d,  $J_{\text{C-F}} = 23.1$  Hz), 111.2, 102.7 (d,  $J_{\text{C-F}} = 2.1$  Hz), 74.1 (d,  $J_{\text{C-F}} = 2.5$  Hz), 36.5 (d,  $J_{\text{C-F}} = 3.5$  Hz), 32.2, 28.2, 22.6, 22.4.  $^{19}\text{F}$  NMR (376 MHz,  $\text{CDCl}_3$ )  $\delta$  -112.2 (s). FT-IR:  $\nu$  ( $\text{cm}^{-1}$ )  $\delta$  3341, 2965, 2026, 1976, 1612, 1580, 1453, 1319, 1217, 1177. HRMS [ESI] calcd for  $\text{C}_{20}\text{H}_{21}\text{FNaO}_2$   $[\text{M}+\text{Na}]^+$  335.1418, found 335.1423.

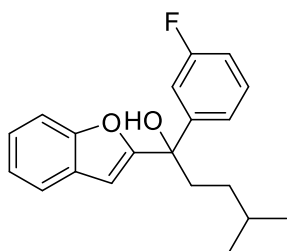

**1l:** yellow oil.  $^1\text{H}$  NMR (400 MHz,  $\text{CDCl}_3$ )  $\delta$  7.53-7.48 (m, 1H), 7.39 (d,  $J = 8.0$  Hz, 1H), 7.29-7.15 (m, 5H), 6.96-6.89 (m, 1H), 6.62 (s, 1H), 2.61 (s, 1H), 2.35-2.26 (m, 1H), 2.21-2.12 (m, 1H), 1.57-1.46 (m, 1H), 1.32-1.22 (m, 1H), 1.15-1.05 (m, 1H), 0.86 (d,  $J = 7.2$  Hz, 3H), 0.84 (d,  $J = 7.2$  Hz, 3H);  $^{13}\text{C}$  NMR (100 MHz,  $\text{CDCl}_3$ )  $\delta$  162.8 (d,  $J_{\text{C-F}} = 244.0$  Hz), 160.8, 154.7, 146.7 (d,  $J_{\text{C-F}} = 6.5$  Hz), 129.6 (d,  $J_{\text{C-F}} = 8.1$  Hz), 128.0, 124.3, 122.9, 121.3 (d,  $J_{\text{C-F}} = 2.8$  Hz), 121.1, 114.2 (d,  $J_{\text{C-F}} = 21.0$  Hz), 113.0 (d,  $J_{\text{C-F}} = 22.8$  Hz), 111.3, 103.1, 75.6 (d,  $J_{\text{C-F}} = 1.5$  Hz), 38.8, 32.1, 28.2, 22.5, 22.4.  $^{19}\text{F}$  NMR (376 MHz,  $\text{CDCl}_3$ )  $\delta$  -112.8 (s). FT-IR:  $\nu$  ( $\text{cm}^{-1}$ )  $\delta$  3398, 2956, 2158, 1614, 1589, 1485, 1328, 1249, 1142, 1050. HRMS [ESI] calcd for  $\text{C}_{20}\text{H}_{21}\text{FNaO}_2$  [ $\text{M}+\text{Na}$ ] $^+$  335.1418, found 335.1425.

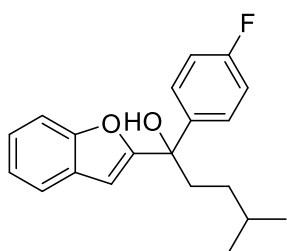

**1m:** yellow oil.  $^1\text{H}$  NMR (400 MHz,  $\text{CDCl}_3$ )  $\delta$  7.56-7.52 (m, 1H), 7.48-7.40 (m, 3H), 7.29-7.19 (m, 2H), 7.06-6.98 (m, 2H), 6.63 (d,  $J = 0.8$  Hz, 1H), 2.57 (s, 1H), 2.38-2.29 (m, 1H), 2.24-2.15 (m, 1H), 1.61-1.49 (m, 1H), 1.33-1.23 (m, 1H), 1.20-1.09 (m, 1H), 0.89 (d,  $J = 6.8$  Hz, 3H), 0.87 (d,  $J = 6.8$  Hz, 3H);  $^{13}\text{C}$  NMR (100 MHz,  $\text{CDCl}_3$ )  $\delta$  162.0 (d,  $J_{\text{C-F}} = 244.4$  Hz), 161.1, 154.7, 139.7 (d,  $J_{\text{C-F}} = 3.0$  Hz), 128.0, 127.4 (d,  $J_{\text{C-F}} = 8.1$  Hz), 124.2, 122.9, 121.1, 114.9 (d,  $J_{\text{C-F}} = 21.2$  Hz), 111.3, 103.0, 75.6, 38.9, 32.2, 28.2, 22.5, 22.5.  $^{19}\text{F}$  NMR (376 MHz,  $\text{CDCl}_3$ )  $\delta$  -115.6 (s). FT-IR:  $\nu$  ( $\text{cm}^{-1}$ )  $\delta$  3457, 2955, 2870, 2216, 1603, 1507, 1468, 1408, 1225, 1131. HRMS [ESI] calcd for  $\text{C}_{20}\text{H}_{21}\text{FNaO}_2$  [ $\text{M}+\text{Na}$ ] $^+$  335.1418, found 335.1415.

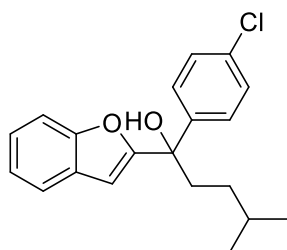

**1n:** yellow oil.  $^1\text{H}$  NMR (400 MHz,  $\text{CDCl}_3$ )  $\delta$  7.57-7.52 (m, 1H), 7.46-7.40 (m, 3H), 7.34-7.28 (m, 2H), 7.28-7.20 (m, 2H), 6.64 (s, 1H), 2.55 (s, 1H), 2.38-2.29 (m, 1H), 2.24-2.15 (m, 1H), 1.61-1.49 (m, 1H), 1.35-1.24 (m, 1H), 1.19-1.07 (m, 1H), 0.89 (d,  $J = 6.8$  Hz, 3H), 0.88 (d,  $J = 7.2$  Hz, 3H);  $^{13}\text{C}$  NMR (100 MHz,  $\text{CDCl}_3$ )  $\delta$  160.9, 154.8, 142.4, 133.2, 128.3, 128.0, 127.2, 124.3, 122.9, 121.1, 111.3, 103.1, 75.6, 38.8, 32.2, 28.2, 22.6, 22.5. FT-IR:  $\nu$  ( $\text{cm}^{-1}$ )  $\delta$  3373, 2956, 1489, 1400, 1346, 1252, 1172, 1092, 1013. HRMS [ESI] calcd for  $\text{C}_{20}\text{H}_{21}\text{ClNaO}_2$  [ $\text{M}+\text{Na}$ ] $^+$  351.1122, found 351.1129.

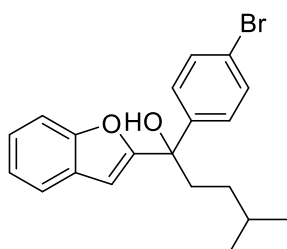

**1o:** yellow oil.  $^1\text{H}$  NMR (400 MHz,  $\text{CDCl}_3$ )  $\delta$  7.55 (d,  $J = 7.2$  Hz, 1H), 7.50-7.45 (m, 2H), 7.43 (d,  $J = 8.0$  Hz, 1H), 7.40-7.34 (m, 2H), 7.30-7.20 (m, 2H), 6.64 (s, 1H), 2.56 (s, 1H), 2.38-2.28 (m, 1H), 2.25-2.14 (m, 1H), 1.61-1.50 (m, 1H), 1.35-1.24 (m, 1H), 1.18-1.07 (m, 1H), 0.90 (d,  $J = 6.8$  Hz, 3H), 0.88 (d,  $J = 7.6$  Hz, 3H);  $^{13}\text{C}$  NMR (100 MHz,  $\text{CDCl}_3$ )  $\delta$  160.8, 154.7, 143.0, 131.2, 127.9, 127.5, 124.3, 122.9, 121.3, 121.1, 111.3, 103.1, 75.6, 38.7, 32.1, 28.2, 22.5, 22.4. FT-IR:  $\nu$  ( $\text{cm}^{-1}$ )  $\delta$  3402, 2955, 2159, 1620, 1581, 1411, 1368, 1222, 1162, 1068. HRMS [ESI] calcd for  $\text{C}_{20}\text{H}_{21}\text{BrNaO}_2$  [ $\text{M}+\text{Na}$ ] $^+$  395.0617, found 395.0616.

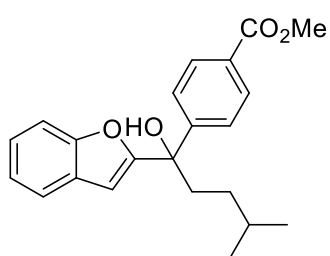

**1p:** yellow oil.  $^1\text{H NMR}$  (400 MHz,  $\text{CDCl}_3$ )  $\delta$  8.02-7.97 (m, 2H), 7.59-7.54 (m, 2H), 7.54-7.50 (m, 1H), 7.40 (d,  $J = 8.0$  Hz, 1H), 7.27-7.17 (m, 2H), 6.64 (s, 1H), 3.88 (s, 3H), 2.80 (s, 1H), 2.40-2.30 (m, 1H), 2.27-2.17 (m, 1H), 1.59-1.48 (m, 1H), 1.36-1.25 (m, 1H), 1.14-1.03 (m, 1H), 0.87 (d,  $J = 6.8$  Hz, 3H), 0.85 (d,  $J = 6.8$  Hz, 3H);  $^{13}\text{C NMR}$  (100 MHz,  $\text{CDCl}_3$ )  $\delta$  166.9, 160.7, 154.7, 148.9, 129.5, 129.1, 127.9, 125.7, 124.3, 122.9, 121.1, 111.3, 103.2, 75.8, 52.0, 38.8, 32.1, 28.2, 22.5, 22.4. FT-IR:  $\nu$  ( $\text{cm}^{-1}$ )  $\delta$  3474, 2972, 2160, 1977, 1692, 1576, 1438, 1368, 1280, 1177. HRMS [ESI] calcd for  $\text{C}_{22}\text{H}_{24}\text{NaO}_4$  [ $\text{M}+\text{Na}$ ] $^+$  375.1567, found 375.1570.

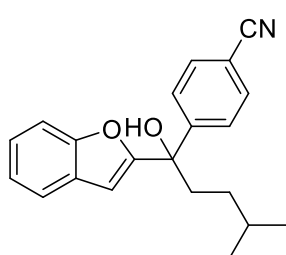

**1q:** yellow oil.  $^1\text{H NMR}$  (400 MHz,  $\text{CDCl}_3$ )  $\delta$  7.65-7.61 (m, 4H), 7.57-7.54 (m, 1H), 7.42 (d,  $J = 8.0$  Hz, 1H), 7.31-7.20 (m, 2H), 6.69 (s, 1H), 2.66 (s, 1H), 2.39-2.30 (m, 1H), 2.25-2.16 (m, 1H), 1.60-1.49 (m, 1H), 1.37-1.25 (m, 1H), 1.11-1.01 (m, 1H), 0.89 (d,  $J = 6.4$  Hz, 3H), 0.87 (d,  $J = 6.8$  Hz, 3H);  $^{13}\text{C NMR}$  (100 MHz,  $\text{CDCl}_3$ )  $\delta$  160.0, 154.7, 149.2, 132.0, 127.8, 126.5, 124.5, 123.0, 121.2, 118.7, 111.3, 111.0, 103.3, 75.6, 38.7, 32.0, 28.1, 22.5, 22.4. FT-IR:  $\nu$  ( $\text{cm}^{-1}$ )  $\delta$  3470, 2952, 2929, 2231, 1608, 1500, 1454, 1385, 1250, 1218. HRMS [ESI] calcd for  $\text{C}_{21}\text{H}_{21}\text{NNaO}_2$  [ $\text{M}+\text{Na}$ ] $^+$  342.1465, found 342.1459.

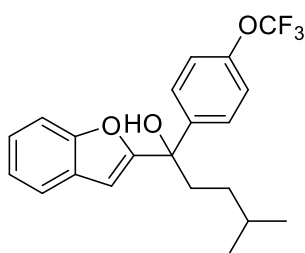

**1r:** yellow oil.  $^1\text{H NMR}$  (400 MHz,  $\text{CDCl}_3$ )  $\delta$  7.58-7.50 (m, 3H), 7.46-7.41 (m, 1H), 7.30-7.22 (m, 2H), 7.22-7.16 (m, 2H), 6.66 (d,  $J = 0.8$  Hz, 1H), 2.58 (s, 1H), 2.40-2.30 (m, 1H), 2.25-2.16 (m, 1H), 1.62-1.51 (m, 1H), 1.35-1.24 (m, 1H), 1.20-1.11 (m, 1H), 0.90 (d,  $J = 6.8$  Hz, 3H), 0.88 (d,  $J = 6.4$  Hz, 3H);  $^{13}\text{C NMR}$  (100 MHz,  $\text{CDCl}_3$ )  $\delta$  160.8, 154.8, 148.4 (q,  $J_{\text{C-F}} = 1.8$  Hz), 142.7, 128.0, 127.2, 124.3, 123.0, 121.1, 120.5, 120.5 (q,  $J_{\text{C-F}} = 255.4$  Hz), 111.3, 103.2, 75.6, 38.9, 32.2, 28.2, 22.5, 22.4.  $^{19}\text{F NMR}$  (376 MHz,  $\text{CDCl}_3$ )  $\delta$  -57.7 (s). FT-IR:  $\nu$  ( $\text{cm}^{-1}$ )  $\delta$  3676, 2957, 2361, 1772, 1699, 1636, 1576, 1521, 1507, 1489, 1374, 1221, 1019. HRMS [ESI] calcd for  $\text{C}_{21}\text{H}_{21}\text{F}_3\text{NaO}_3$  [ $\text{M}+\text{Na}$ ] $^+$  401.1335, found 401.1336.

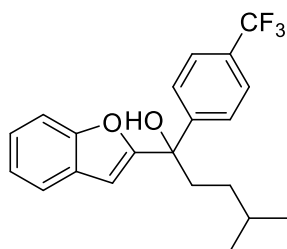

**1s:** yellow oil.  $^1\text{H NMR}$  (400 MHz,  $\text{CDCl}_3$ )  $\delta$  7.64-7.55 (m, 4H), 7.53 (d,  $J = 7.2$  Hz, 1H), 7.40 (d,  $J = 7.6$  Hz, 1H), 7.26-7.17 (m, 2H), 6.64 (s, 1H), 2.77 (s, 1H), 2.40-2.30 (m, 1H), 2.26-2.17 (m, 1H), 1.60-1.48 (m, 1H), 1.36-1.25 (m, 1H), 1.14-1.03 (m, 1H), 0.88 (d,  $J = 6.8$  Hz, 3H), 0.86 (d,  $J = 6.8$  Hz, 3H);  $^{13}\text{C NMR}$  (100 MHz,  $\text{CDCl}_3$ )  $\delta$  160.5, 154.8, 147.9, 129.5 (q,  $J_{\text{C-F}} = 32.1$  Hz), 127.9, 126.1, 125.1 (q,  $J_{\text{C-F}} = 3.8$  Hz), 124.4, 124.2 (q,  $J_{\text{C-F}} = 270.4$  Hz), 123.0, 121.2, 111.3, 103.3, 75.7, 38.8, 32.1, 28.2, 22.5, 22.4.  $^{19}\text{F NMR}$  (376 MHz,  $\text{CDCl}_3$ )  $\delta$  -62.3 (s). FT-IR:  $\nu$  ( $\text{cm}^{-1}$ )  $\delta$  3394, 2956, 2159, 1976, 1620, 1581, 1411, 1369, 1324, 1068. HRMS [ESI] calcd for  $\text{C}_{21}\text{H}_{21}\text{F}_3\text{NaO}_2$  [ $\text{M}+\text{Na}$ ] $^+$  385.1386, found 385.1385.



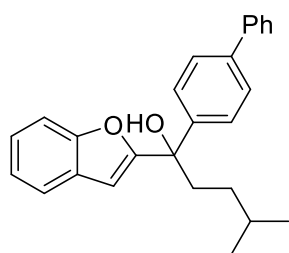

**1t:** yellow oil.  $^1\text{H}$  NMR (400 MHz,  $\text{CDCl}_3$ )  $\delta$  7.62-7.54 (m, 7H), 7.47-7.41 (m, 3H), 7.37-7.32 (m, 1H), 7.29-7.20 (m, 2H), 6.69 (s, 1H), 2.59 (s, 1H), 2.45-2.35 (m, 1H), 2.32-2.22 (m, 1H), 1.64-1.56 (m, 1H), 1.39-1.17 (m, 2H), 0.91 (d,  $J = 6.4$  Hz, 3H), 0.90 (d,  $J = 6.4$  Hz, 3H);  $^{13}\text{C}$  NMR (100 MHz,  $\text{CDCl}_3$ )  $\delta$  161.3, 154.8, 143.0, 140.6, 140.1, 128.7, 128.1, 127.2, 127.0, 126.9, 126.1, 124.1, 122.8, 121.1, 111.3, 103.1, 75.8, 38.8, 32.3, 28.3, 22.6, 22.5. FT-IR:  $\nu$  ( $\text{cm}^{-1}$ )  $\delta$  3394, 2924, 2160, 1975, 1574, 1453, 1366, 1247, 1170, 1075. HRMS [ESI] calcd for  $\text{C}_{26}\text{H}_{26}\text{NaO}_2$  [ $\text{M}+\text{Na}$ ] $^+$  393.1825, found 393.1829.

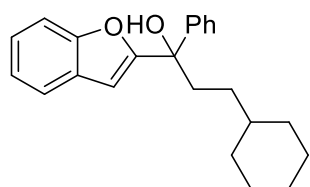

**1u:** yellow oil.  $^1\text{H}$  NMR (400 MHz,  $\text{CDCl}_3$ )  $\delta$  7.54-7.50 (m, 1H), 7.50-7.45 (m, 2H), 7.43-7.39 (m, 1H), 7.36-7.30 (m, 2H), 7.29-7.25 (m, 1H), 7.24-7.17 (m, 2H), 6.62 (s, 1H), 2.58 (s, 1H), 2.41-2.32 (m, 1H), 2.28-2.18 (m, 1H), 1.75-1.58 (m, 5H), 1.34-1.07 (m, 6H), 0.93-0.79 (m, 2H);  $^{13}\text{C}$  NMR (100 MHz,  $\text{CDCl}_3$ )  $\delta$  161.4, 154.7, 144.0, 128.1, 128.1, 127.3, 125.6, 124.0, 122.8, 121.0, 111.3, 103.0, 76.0, 38.4, 37.9, 33.3, 33.2, 30.8, 26.6, 26.3. FT-IR:  $\nu$  ( $\text{cm}^{-1}$ )  $\delta$  3413, 2921, 2159, 1970, 1600, 1582, 1452, 1379, 1251, 1092. HRMS [ESI] calcd for  $\text{C}_{23}\text{H}_{26}\text{NaO}_2$  [ $\text{M}+\text{Na}$ ] $^+$  357.1825, found 357.1824.

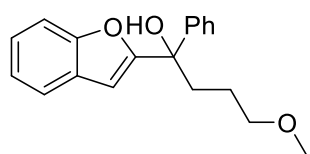

**1v:** yellow solid, m.p. 85-86  $^\circ\text{C}$ .  $^1\text{H}$  NMR (400 MHz,  $\text{CDCl}_3$ )  $\delta$  7.56-7.49 (m, 3H), 7.41 (d,  $J = 7.6$  Hz, 1H), 7.35-7.30 (m, 2H), 7.26-7.15 (m, 3H), 6.65 (s, 1H), 4.33 (s, 1H), 3.40 (t,  $J = 6.0$  Hz, 2H), 3.32 (s, 3H), 2.59-2.50 (m, 1H), 2.39-2.30 (m, 1H), 1.74-1.54 (m, 2H);  $^{13}\text{C}$  NMR (100 MHz,  $\text{CDCl}_3$ )  $\delta$  161.8, 154.8, 144.3, 128.2, 128.1, 127.2, 125.7, 123.8, 122.6, 121.0, 111.2, 103.0, 75.2, 72.9, 58.5, 38.7, 24.1. FT-IR:  $\nu$  ( $\text{cm}^{-1}$ )  $\delta$  3367, 1677, 1581, 1454, 1386, 1303, 1254, 1154, 1115, 1066. HRMS [ESI] calcd for  $\text{C}_{19}\text{H}_{20}\text{NaO}_3$  [ $\text{M}+\text{Na}$ ] $^+$  319.1305, found 319.1311.

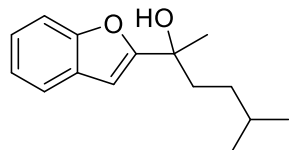

**1w:** yellow oil.  $^1\text{H}$  NMR (400 MHz,  $\text{CDCl}_3$ )  $\delta$  7.52 (d,  $J = 7.2$  Hz, 1H), 7.45 (d,  $J = 8.0$  Hz, 1H), 7.26-7.17 (m, 2H), 6.57 (s, 1H), 2.39 (s, 1H), 1.95-1.89 (m, 2H), 1.61 (s, 3H), 1.56-1.44 (m, 1H), 1.21-1.12 (m, 2H), 0.86 (d,  $J = 6.8$  Hz, 6H);  $^{13}\text{C}$  NMR (100 MHz,  $\text{CDCl}_3$ )  $\delta$  162.5, 154.6, 128.3, 123.7, 122.6, 120.8, 111.1, 101.2, 72.0, 39.3, 32.9, 28.2, 26.7, 22.5. FT-IR:  $\nu$  ( $\text{cm}^{-1}$ )  $\delta$  3383, 2955, 2159, 1584, 1454, 1384, 1328, 1251, 1142, 1069. HRMS [ESI] calcd for  $\text{C}_{15}\text{H}_{20}\text{NaO}_2$  [ $\text{M}+\text{Na}$ ] $^+$  255.1356, found 255.1354.

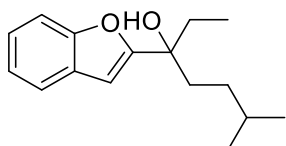

**1x:** yellow oil.  $^1\text{H}$  NMR (400 MHz,  $\text{CDCl}_3$ )  $\delta$  7.55-7.51 (m, 1H), 7.45 (d,  $J = 7.6$  Hz, 1H), 7.26-7.18 (m, 2H), 6.60 (s, 1H), 2.08 (s, 1H), 2.02-1.80 (m, 4H), 1.56-1.44 (m, 1H), 1.29-1.18 (m, 1H), 1.13-1.03 (m, 1H), 0.89-0.83 (m, 9H);  $^{13}\text{C}$  NMR (100 MHz,  $\text{CDCl}_3$ )  $\delta$  161.7, 154.7, 128.4, 123.5, 122.6, 120.7, 111.1, 102.4, 75.1, 37.3, 32.6, 32.3, 28.3, 22.5, 22.5, 7.8. FT-IR:  $\nu$  ( $\text{cm}^{-1}$ )  $\delta$  3676, 2956, 1772, 1699, 1576, 1498, 1396, 1339, 1256, 1162, 1056. HRMS [ESI] calcd for  $\text{C}_{16}\text{H}_{22}\text{NaO}_2$  [ $\text{M}+\text{Na}$ ] $^+$  269.1512, found 269.1510.

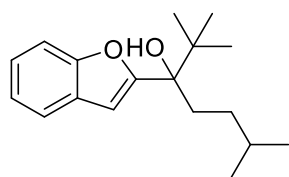

**1y:** yellow oil.  $^1\text{H}$  NMR (400 MHz,  $\text{CDCl}_3$ )  $\delta$  7.57-7.53 (m, 1H), 7.48-7.44 (m, 1H), 7.27-7.19 (m, 2H), 6.62 (s, 1H), 2.20-2.11 (m, 2H), 1.87-1.77 (m, 1H), 1.58-1.47 (m, 1H), 1.29-1.18 (m, 1H), 1.03 (s, 9H), 0.87 (d,  $J = 6.4$  Hz, 3H), 0.85 (d,  $J = 6.4$  Hz, 3H), 0.83-0.73 (m, 1H);  $^{13}\text{C}$  NMR (100 MHz,  $\text{CDCl}_3$ )  $\delta$  161.3, 154.4, 128.3, 123.3, 122.6, 120.6, 111.0, 104.1, 79.8, 38.7, 32.8, 31.5, 28.4, 25.6, 22.7, 22.4. FT-IR:  $\nu$  ( $\text{cm}^{-1}$ )  $\delta$  2957, 1466, 1396, 1305, 1214, 1177, 1132, 1072, 1037. HRMS [ESI] calcd for  $\text{C}_{18}\text{H}_{26}\text{NaO}_2$   $[\text{M}+\text{Na}]^+$  297.1825, found 297.1822.

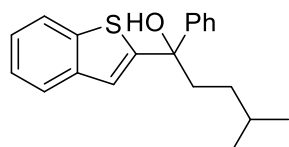

**1z:** yellow oil.  $^1\text{H}$  NMR (400 MHz,  $\text{CDCl}_3$ )  $\delta$  7.74 (d,  $J = 8.0$ , 1H), 7.69-7.65 (m, 1H), 7.55-7.50 (m, 2H), 7.37-7.30 (m, 2H), 7.29-7.23 (m, 3H), 7.14 (s, 1H), 2.55-2.28 (m, 3H), 1.63-1.51 (m, 1H), 1.41-1.29 (m, 1H), 1.22-1.10 (m, 1H), 0.89 (d,  $J = 6.8$  Hz, 3H), 0.88 (d,  $J = 6.4$  Hz, 3H);  $^{13}\text{C}$  NMR (100 MHz,  $\text{CDCl}_3$ )  $\delta$  153.7, 145.4, 139.6, 139.6, 128.2, 127.2, 125.6, 124.2, 124.1, 123.5, 122.3, 120.2, 77.5, 41.1, 32.6, 28.3, 22.6, 22.5. FT-IR:  $\nu$  ( $\text{cm}^{-1}$ )  $\delta$  3059, 2953, 1601, 1458, 1384, 1304, 1216, 1156, 1130, 1032. HRMS [ESI] calcd for  $\text{C}_{20}\text{H}_{22}\text{NaOS}$   $[\text{M}+\text{Na}]^+$  333.1284, found 333.1287.

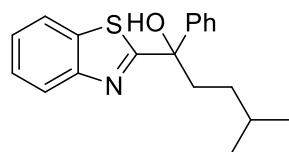

**1aa:**<sup>1</sup> yellow oil.  $^1\text{H}$  NMR (400 MHz,  $\text{CDCl}_3$ )  $\delta$  8.03-7.99 (m, 1H), 7.85-7.81 (m, 1H), 7.72-7.68 (m, 2H), 7.49-7.43 (m, 1H), 7.40-7.32 (m, 3H), 7.31-7.26 (m, 1H), 3.93 (s, 1H), 2.51-2.44 (m, 2H), 1.66-1.54 (m, 1H), 1.37-1.21 (m, 2H), 0.90 (d,  $J = 6.4$  Hz, 6H);  $^{13}\text{C}$  NMR (100 MHz,  $\text{CDCl}_3$ )  $\delta$  178.4, 152.6, 144.0, 135.7, 128.4, 127.5, 125.9, 125.6, 124.9, 123.1, 121.7, 78.9, 40.5, 32.3, 28.2, 22.6, 22.5.

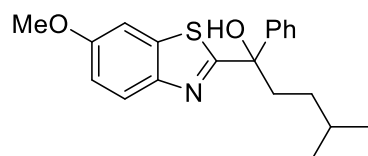

**1ab:**<sup>1</sup> yellow oil.  $^1\text{H}$  NMR (400 MHz,  $\text{CDCl}_3$ )  $\delta$  7.87 (d,  $J = 8.8$  Hz, 1H), 7.69-7.64 (m, 2H), 7.39-7.33 (m, 2H), 7.29-7.24 (m, 2H), 7.05 (dd,  $J = 8.8, 2.4$  Hz, 1H), 3.85 (s, 3H), 3.83 (s, 1H), 2.47-2.40 (m, 2H), 1.64-1.53 (m, 1H), 1.31-1.22 (m, 2H), 0.89 (d,  $J = 6.8$  Hz, 3H), 0.89 (d,  $J = 6.4$  Hz, 3H);  $^{13}\text{C}$  NMR (100 MHz,  $\text{CDCl}_3$ )  $\delta$  175.7, 157.5, 147.0, 144.2, 137.0, 128.3, 127.4, 125.5, 123.5, 115.2, 104.2, 78.8, 55.8, 40.5, 32.3, 28.2, 22.6, 22.5.

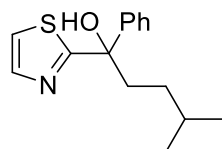

**1ac:**<sup>1</sup> yellow oil.  $^1\text{H}$  NMR (400 MHz,  $\text{CDCl}_3$ )  $\delta$  7.71 (d,  $J = 3.2$  Hz, 1H), 7.66-7.62 (m, 2H), 7.40-7.34 (m, 2H), 7.31-7.26 (m, 2H), 3.75 (s, 1H), 2.44-2.38 (m, 2H), 1.63-1.52 (m, 1H), 1.27-1.19 (m, 2H), 0.90 (d,  $J = 6.4$  Hz, 3H), 0.89 (d,  $J = 6.4$  Hz, 3H);  $^{13}\text{C}$  NMR (100 MHz,  $\text{CDCl}_3$ )  $\delta$  178.0, 144.5, 141.9, 128.3, 127.3, 125.4, 119.4, 78.7, 40.9, 32.3, 28.2, 22.6, 22.4.

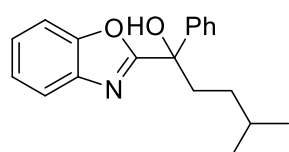

**1ad:** yellow oil.  $^1\text{H}$  NMR (400 MHz,  $\text{CDCl}_3$ )  $\delta$  7.73-7.67 (m, 1H), 7.62 (d,  $J = 7.6$  Hz, 2H), 7.52-7.46 (m, 1H), 7.37-7.23 (m, 5H), 3.93 (s, 1H), 2.48-2.38 (m, 1H), 2.38-2.28 (m, 1H), 1.60-1.51 (m, 1H), 1.36-1.25 (m, 1H), 1.21-1.10 (m, 1H), 0.90-0.82 (m, 6H);  $^{13}\text{C}$  NMR

<sup>1</sup> X. Wu, M. Wang, L. Huan, D. Wang, J. Wang and C. Zhu, *Angew. Chem. Int. Ed.*, 2018, **57**, 1640.

(100 MHz, CDCl<sub>3</sub>)  $\delta$  169.2, 151.2, 142.8, 140.3, 128.4, 127.7, 125.3, 125.1, 124.5, 120.1, 110.9, 76.1, 39.0, 32.2, 28.1, 22.5, 22.4. FT-IR:  $\nu$  (cm<sup>-1</sup>)  $\delta$  3359, 2966, 1562, 1456, 1351, 1272, 1198, 1104, 1004. HRMS [ESI] calcd for C<sub>19</sub>H<sub>21</sub>NNaO<sub>2</sub> [M+Na]<sup>+</sup> 318.1465, found 318.1462.

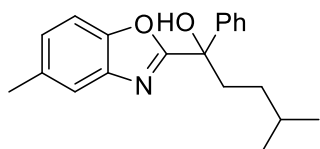

**1ae:** yellow oil. <sup>1</sup>H NMR (400 MHz, CDCl<sub>3</sub>)  $\delta$  7.65-7.60 (m, 2H), 7.50-7.47 (m, 1H), 7.40-7.33 (m, 3H), 7.30-7.25 (m, 1H), 7.15-7.11 (m, 1H), 3.87 (br, 1H), 2.49-2.39 (m, 1H), 2.46 (s, 3H), 2.36-2.28 (m, 1H), 1.62-1.51 (m, 1H), 1.38-1.27 (m, 1H), 1.20-1.10 (m, 1H), 0.88 (d, *J* = 6.4 Hz, 3H), 0.87 (d, *J* = 6.4 Hz, 3H); <sup>13</sup>C NMR (100 MHz, CDCl<sub>3</sub>)  $\delta$  169.2, 149.5, 143.0, 140.5, 134.4, 128.4, 127.7, 126.1, 125.3, 120.0, 110.2, 76.1, 39.0, 32.3, 28.1, 22.5, 22.4, 21.4. FT-IR:  $\nu$  (cm<sup>-1</sup>)  $\delta$  3028, 1601, 1483, 1384, 1261, 1176, 1142, 1088, 1032. HRMS [ESI] calcd for C<sub>20</sub>H<sub>23</sub>NNaO<sub>2</sub> [M+Na]<sup>+</sup> 332.1621, found 332.1628.

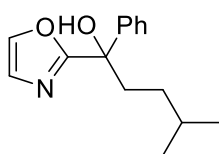

**1af:** yellow oil. <sup>1</sup>H NMR (400 MHz, CDCl<sub>3</sub>)  $\delta$  7.60 (d, *J* = 0.8 Hz, 1H), 7.52-7.48 (m, 2H), 7.36-7.30 (m, 2H), 7.28-7.23 (m, 1H), 7.02 (d, *J* = 0.8 Hz, 1H), 4.07 (br, 1H), 2.35-2.16 (m, 2H), 1.58-1.46 (m, 1H), 1.31-1.21 (m, 1H), 1.13-1.03 (m, 1H), 0.86 (d, *J* = 6.4 Hz, 3H), 0.85 (d, *J* = 6.8 Hz, 3H); <sup>13</sup>C NMR (100 MHz, CDCl<sub>3</sub>)  $\delta$  167.4, 143.5, 139.1, 128.2, 127.5, 126.5, 125.2, 75.9, 39.4, 32.3, 28.1, 22.5, 22.4. FT-IR:  $\nu$  (cm<sup>-1</sup>)  $\delta$  2956, 1599, 1492, 1357, 1289, 1222, 1170, 1078. HRMS [ESI] calcd for C<sub>15</sub>H<sub>19</sub>NNaO<sub>2</sub> [M+Na]<sup>+</sup> 268.1308, found 268.1301.

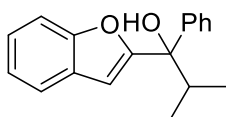

**1ag:** yellow oil. <sup>1</sup>H NMR (400 MHz, CDCl<sub>3</sub>)  $\delta$  7.62-7.58 (m, 2H), 7.54-7.50 (m, 1H), 7.44 (d, *J* = 8.0 Hz, 1H), 7.36-7.31 (m, 2H), 7.25-7.17 (m, 3H), 6.72 (s, 1H), 2.86-2.75 (m, 1H), 2.49 (s, 1H), 1.00 (d, *J* = 6.8 Hz, 3H), 0.84 (d, *J* = 6.8 Hz, 3H); <sup>13</sup>C NMR (100 MHz, CDCl<sub>3</sub>)  $\delta$  161.5, 154.7, 143.3, 128.2, 128.0, 127.1, 125.6, 123.8, 122.7, 120.9, 111.2, 102.7, 78.7, 36.2, 17.3, 16.7. FT-IR:  $\nu$  (cm<sup>-1</sup>)  $\delta$  3420, 2974, 2159, 2019, 1599, 1490, 1386, 1281, 1164, 1050. HRMS [ESI] calcd for C<sub>18</sub>H<sub>18</sub>NaO<sub>2</sub> [M+Na]<sup>+</sup> 289.1199, found 289.1194.

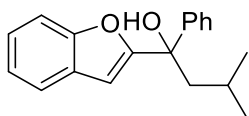

**1ah:** yellow oil. <sup>1</sup>H NMR (400 MHz, CDCl<sub>3</sub>)  $\delta$  7.57-7.51 (m, 3H), 7.44 (d, *J* = 7.6 Hz, 1H), 7.39-7.33 (m, 2H), 7.31-7.19 (m, 3H), 6.65 (s, 1H), 2.56 (s, 1H), 2.35-2.28 (m, 1H), 2.24-2.18 (m, 1H), 1.84-1.73 (m, 1H), 0.95 (d, *J* = 6.8 Hz, 3H), 0.86 (d, *J* = 6.8 Hz, 3H); <sup>13</sup>C NMR (100 MHz, CDCl<sub>3</sub>)  $\delta$  161.8, 154.7, 144.2, 128.1, 127.3, 125.6, 124.0, 122.8, 121.0, 111.3, 102.7, 76.4, 49.2, 24.5, 24.2, 24.2. FT-IR:  $\nu$  (cm<sup>-1</sup>)  $\delta$  2954, 1558, 1468, 1365, 1252, 1173, 1128, 1058. HRMS [ESI] calcd for C<sub>19</sub>H<sub>20</sub>NaO<sub>2</sub> [M+Na]<sup>+</sup> 303.1356, found 303.1355.

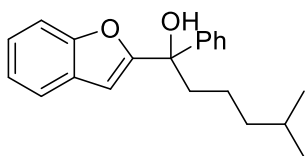

**1ai:** yellow oil. <sup>1</sup>H NMR (400 MHz, CDCl<sub>3</sub>)  $\delta$  7.55-7.51 (m, 1H), 7.50-7.45 (m, 2H), 7.41 (d, *J* = 8.0 Hz, 1H), 7.36-7.30 (m, 2H), 7.29-7.17 (m, 3H), 6.63 (s, 1H), 2.60 (br, 1H), 2.37-2.28 (m, 1H), 2.23-2.14 (m, 1H), 1.56-1.46 (m, 1H), 1.46-1.35 (m, 1H), 1.32-1.23 (m, 1H), 1.23-1.13 (m, 2H), 0.82 (d, *J* = 6.4 Hz, 6H); <sup>13</sup>C NMR (100 MHz, CDCl<sub>3</sub>)  $\delta$  161.4, 154.7, 143.9, 128.1, 128.1, 127.3, 125.6, 124.1, 122.8, 121.0, 111.3, 103.0, 75.9, 41.1, 39.1, 27.7, 22.6, 22.5, 21.2. FT-IR:  $\nu$  (cm<sup>-1</sup>)  $\delta$  3676, 2953, 1717, 1653, 1521, 1508, 1473, 1386, 1252, 1066. HRMS [ESI] calcd for C<sub>21</sub>H<sub>24</sub>NaO<sub>2</sub> [M+Na]<sup>+</sup> 331.1669, found 331.1675.

## b. Products

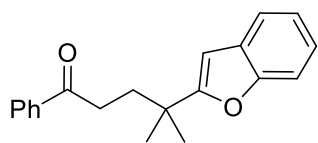

**2a:** 40.6 mg, 70% yield, yellow solid, m.p. 50-51 °C. Purification by flash column chromatography (eluent: EtOAc/Petroleum ether = 1/100-1/50). <sup>1</sup>H NMR (400 MHz, CDCl<sub>3</sub>) δ 7.85 (d, *J* = 7.6 Hz, 2H), 7.55-7.47 (m, 2H), 7.45 (d, *J* = 7.6 Hz, 1H), 7.42-7.35 (m, 2H), 7.27-7.18 (m, 2H), 6.46 (s, 1H), 2.90-2.82 (m, 2H), 2.23-2.15 (m, 2H), 1.45 (s, 6H); <sup>13</sup>C NMR (100 MHz, CDCl<sub>3</sub>) δ 200.0, 164.9, 154.6, 136.7, 132.8, 128.6, 128.4, 127.9, 123.3, 122.4, 120.4, 110.8, 101.0, 35.8, 35.6, 34.3, 26.7. FT-IR: ν (cm<sup>-1</sup>) δ 2972, 2160, 1976, 1683, 1471, 1357, 1255, 1213, 1165, 1080. HRMS [ESI] calcd for C<sub>20</sub>H<sub>20</sub>O<sub>2</sub>Na [M+Na]<sup>+</sup> 315.1356, found 315.1364.

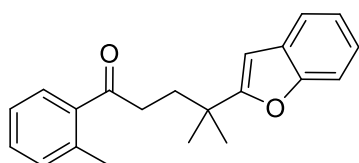

**2b:** 25.8 mg, 42% yield, yellow oil. Purification by flash column chromatography (eluent: EtOAc/Petroleum ether = 1/100-1/50). <sup>1</sup>H NMR (400 MHz, CDCl<sub>3</sub>) δ 7.52-7.46 (m, 2H), 7.44-7.40 (m, 1H), 7.35-7.29 (m, 1H), 7.25-7.14 (m, 4H), 6.42 (d, *J* = 0.8 Hz, 1H), 2.80-2.74 (m, 2H), 2.43 (s, 3H), 2.17-2.11 (m, 2H), 1.41 (s, 6H); <sup>13</sup>C NMR (100 MHz, CDCl<sub>3</sub>) δ 204.2, 165.1, 154.6, 138.0, 137.9, 131.8, 131.1, 128.6, 128.3, 125.6, 123.3, 122.4, 120.4, 110.9, 101.0, 37.4, 35.9, 35.7, 26.8, 21.2. FT-IR: ν (cm<sup>-1</sup>) δ 2966, 1683, 1580, 1454, 1300, 1214, 1082, 1006. HRMS [ESI] calcd for C<sub>21</sub>H<sub>22</sub>NaO<sub>2</sub> [M+Na]<sup>+</sup> 329.1512, found 329.1504.

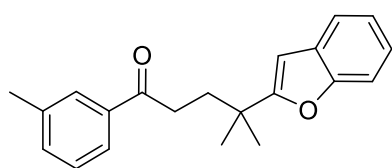

**2c:** 28.9 mg, 47% yield, yellow oil. Purification by flash column chromatography (eluent: EtOAc/Petroleum ether = 1/100-1/50). <sup>1</sup>H NMR (400 MHz, CDCl<sub>3</sub>) δ 7.64-7.60 (m, 2H), 7.52-7.48 (m, 1H), 7.42 (d, *J* = 7.6 Hz, 1H), 7.33-7.16 (m, 4H), 6.44 (s, 1H), 2.85-2.78 (m, 2H), 2.34 (s, 3H), 2.18-2.13 (m, 2H), 1.42 (s, 6H); <sup>13</sup>C NMR (100 MHz, CDCl<sub>3</sub>) δ 200.4, 165.1, 154.7, 138.3, 136.8, 133.6, 128.7, 128.5, 128.3, 125.3, 123.3, 122.4, 120.4, 110.9, 101.0, 35.9, 35.8, 34.5, 26.8, 21.3. FT-IR: ν (cm<sup>-1</sup>) δ 2965, 1682, 1583, 1470, 1301, 1254, 1110, 1006. HRMS [ESI] calcd for C<sub>21</sub>H<sub>22</sub>NaO<sub>2</sub> [M+Na]<sup>+</sup> 329.1512, found 329.1504.

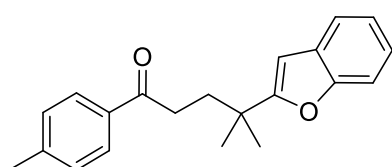

**2d:** 31.4 mg, 51% yield, yellow solid, m.p. 81-82 °C. Purification by flash column chromatography (eluent: EtOAc/Petroleum ether = 1/100-1/50). <sup>1</sup>H NMR (400 MHz, CDCl<sub>3</sub>) δ 7.77-7.73 (m, 2H), 7.54-7.50 (m, 1H), 7.44 (d, *J* = 8.0 Hz, 1H), 7.26-7.17 (m, 4H), 6.45 (s, 1H), 2.85-2.79 (m, 2H), 2.39 (s, 3H), 2.20-2.14 (m, 2H), 1.43 (s, 6H); <sup>13</sup>C NMR (100 MHz, CDCl<sub>3</sub>) δ 199.8, 165.1, 154.6, 143.6, 134.3, 129.1, 128.6, 128.1, 123.3, 122.4, 120.4, 110.9, 101.0, 35.9, 35.8, 34.3, 26.8, 21.5. FT-IR: ν (cm<sup>-1</sup>) δ 2975, 1749, 1653, 1607, 1558, 1489, 1418, 1388, 1303, 1221, 1082, 1008. HRMS [ESI] calcd for C<sub>21</sub>H<sub>22</sub>NaO<sub>2</sub> [M+Na]<sup>+</sup> 329.1512, found 329.1509.

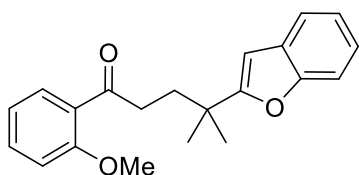

**2e:** 42.7 mg, 66% yield, yellow oil. Purification by flash column chromatography (eluent: Acetone/Petroleum ether = 1/100-1/50). <sup>1</sup>H NMR (400 MHz, CDCl<sub>3</sub>) δ 7.58 (dd, *J* = 7.6, 1.6 Hz, 1H), 7.52-7.48 (m, 1H), 7.44-7.38 (m, 2H), 7.25-7.16 (m, 2H), 6.98-6.93 (m, 1H), 6.88 (d, *J* = 8.4 Hz, 1H), 6.42 (s,

1H), 3.70 (s, 3H), 2.91-2.85 (m, 2H), 2.15-2.09 (m, 2H), 1.41 (s, 6H); <sup>13</sup>C NMR (100 MHz, CDCl<sub>3</sub>) δ 202.9, 165.4, 158.2, 154.6, 133.1, 130.1, 128.7, 128.6, 123.1, 122.3, 120.5, 120.3, 111.4, 110.8, 100.7, 55.2, 39.5, 35.9, 35.9, 26.7. FT-IR: ν (cm<sup>-1</sup>) δ 2968, 1672, 1579, 1455, 1387, 1283, 1165, 1082, 1024. HRMS [ESI] calcd for C<sub>21</sub>H<sub>22</sub>NaO<sub>3</sub> [M+Na]<sup>+</sup> 345.1461, found 345.1468.

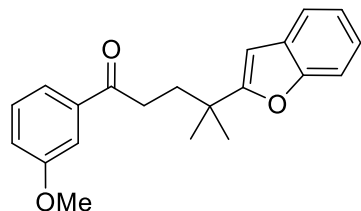

**2f:** 35.5 mg, 55% yield, yellow oil. Purification by flash column chromatography (eluent: EtOAc/Petroleum ether = 1/100-1/50). <sup>1</sup>H NMR (400 MHz, CDCl<sub>3</sub>) δ 7.53-7.49 (m, 1H), 7.45-7.38 (m, 3H), 7.32-7.16 (m, 3H), 7.09-7.04 (m, 1H), 6.44 (s, 1H), 3.81 (s, 3H), 2.86-2.80 (m, 2H), 2.20-2.14 (m, 2H), 1.43 (s, 6H); <sup>13</sup>C NMR (100 MHz, CDCl<sub>3</sub>) δ 200.0, 165.0, 159.7, 154.6, 138.2, 129.4, 128.6, 123.3, 122.4, 120.7, 120.4, 119.3, 112.3, 110.9, 101.0, 55.4, 35.9, 35.8, 34.6, 26.8. FT-IR: ν (cm<sup>-1</sup>) δ 2967, 2360, 1684, 1582, 1522, 1487, 1388, 1255, 1196, 1110, 1010. HRMS [ESI] calcd for C<sub>21</sub>H<sub>22</sub>NaO<sub>3</sub> [M+Na]<sup>+</sup> 345.1461, found 345.1464.

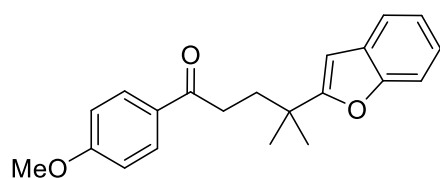

**2g:** 41.0 mg, 64% yield, yellow solid, m.p. 47-48 °C. Purification by flash column chromatography (eluent: EtOAc/Petroleum ether = 1/100-1/50). <sup>1</sup>H NMR (400 MHz, CDCl<sub>3</sub>) δ 7.84-7.79 (m, 2H), 7.53-7.49 (m, 1H), 7.43 (d, *J* = 8.0 Hz, 1H), 7.26-7.16 (m, 2H), 6.88-6.83 (m, 2H), 6.44 (s, 1H), 3.84 (s, 3H), 2.81-2.75 (m, 2H), 2.18-2.12 (m, 2H), 1.42 (s, 6H); <sup>13</sup>C NMR (100 MHz, CDCl<sub>3</sub>) δ 198.8, 165.1, 163.3, 154.6, 130.3, 129.8, 128.6, 123.3, 122.4, 120.4, 113.6, 110.9, 101.0, 55.4, 36.0, 36.0, 34.1, 26.8. FT-IR: ν (cm<sup>-1</sup>) δ 2967, 1679, 1577, 1510, 1419, 1307, 1216, 1170, 1095, 1031. HRMS [ESI] calcd for C<sub>21</sub>H<sub>22</sub>NaO<sub>3</sub> [M+Na]<sup>+</sup> 345.1461, found 345.1464.

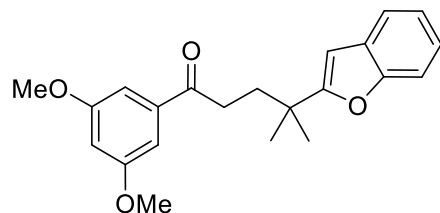

**2h:** 30.1 mg, 43% yield, yellow oil. Purification by flash column chromatography (eluent: EtOAc/Petroleum ether = 1/80-1/40). <sup>1</sup>H NMR (400 MHz, CDCl<sub>3</sub>) δ 7.52-7.48 (m, 1H), 7.42 (d, *J* = 7.6 Hz, 1H), 7.25-7.16 (m, 2H), 7.00-6.97 (m, 2H), 6.62-6.59 (m, 1H), 6.44 (s, 1H), 3.78 (s, 6H), 2.83-2.77 (m, 2H), 2.18-2.13 (m, 2H), 1.42 (s, 6H); <sup>13</sup>C NMR (100 MHz, CDCl<sub>3</sub>) δ 199.8, 164.9, 160.8, 154.6, 138.8, 128.6, 123.3, 122.4, 120.4, 110.9, 105.9, 105.0, 101.0, 55.5, 35.9, 35.9, 34.6, 26.8. FT-IR: ν (cm<sup>-1</sup>) δ 2921, 2360, 1684, 1593, 1455, 1387, 1255, 1205, 1110, 1064, 1013. HRMS [ESI] calcd for C<sub>22</sub>H<sub>24</sub>NaO<sub>4</sub> [M+Na]<sup>+</sup> 375.1567, found 375.1568.

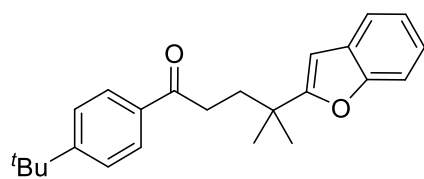

**2i:** 45.3 mg, 65% yield, yellow oil. Purification by flash column chromatography (eluent: EtOAc/Petroleum ether = 1/100-1/50). <sup>1</sup>H NMR (400 MHz, CDCl<sub>3</sub>) δ 7.81-7.76 (m, 2H), 7.54-7.50 (m, 1H), 7.45-7.38 (m, 3H), 7.26-7.17 (m, 2H), 6.45 (s, 1H), 2.86-2.80 (m, 2H), 2.20-2.14 (m, 2H), 1.43 (s, 6H), 1.33 (s, 9H); <sup>13</sup>C NMR (100 MHz, CDCl<sub>3</sub>) δ 199.9, 165.1, 156.5, 154.6, 134.2, 128.6, 128.0, 125.4, 123.3, 122.4, 120.4, 110.9, 101.0, 36.0, 35.8, 35.0, 34.4, 31.0, 26.8. FT-IR: ν

( $\text{cm}^{-1}$ )  $\delta$  2966, 2360, 1682, 1606, 1559, 1471, 1388, 1300, 1255, 1192, 1083. HRMS [ESI] calcd for  $\text{C}_{24}\text{H}_{28}\text{NaO}_2$   $[\text{M}+\text{Na}]^+$  371.1982, found 371.1985.

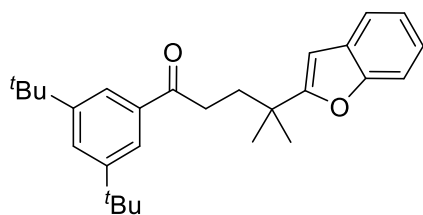

**2j**: 53.8 mg, 67% yield, yellow oil. Purification by flash column chromatography (eluent: EtOAc/Petroleum ether = 1/100-1/50).  $^1\text{H}$  NMR (400 MHz,  $\text{CDCl}_3$ )  $\delta$  7.73 (d,  $J$  = 1.6 Hz, 2H), 7.64-7.62 (m, 1H), 7.54-7.50 (m, 1H), 7.44 (d,  $J$  = 8.0 Hz, 1H), 7.26-7.17 (m, 2H), 6.47 (s, 1H), 2.91-2.85 (m, 2H), 2.22-2.15 (m, 2H), 1.46 (s, 6H), 1.34

(s, 18H);  $^{13}\text{C}$  NMR (100 MHz,  $\text{CDCl}_3$ )  $\delta$  201.1, 165.1, 154.7, 151.1, 136.5, 128.6, 127.1, 123.3, 122.4, 122.3, 120.4, 110.9, 100.9, 36.5, 36.0, 34.9, 34.6, 31.3, 26.8. FT-IR:  $\nu$  ( $\text{cm}^{-1}$ )  $\delta$  2965, 2361, 1683, 1596, 1473, 1364, 1204, 1168, 1083. HRMS [ESI] calcd for  $\text{C}_{28}\text{H}_{36}\text{NaO}_2$   $[\text{M}+\text{Na}]^+$  427.2608, found 427.2611.

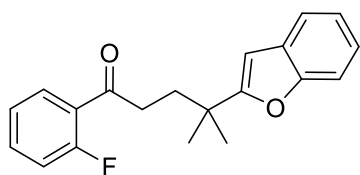

**2k**: 37.8 mg, 61% yield, yellow solid, m.p. 57-58 °C. Purification by flash column chromatography (eluent: EtOAc/Petroleum ether = 1/100-1/50).  $^1\text{H}$  NMR (400 MHz,  $\text{CDCl}_3$ )  $\delta$  7.78-7.72 (m, 1H), 7.52-7.39 (m, 3H), 7.25-7.14 (m, 3H), 7.11-7.04 (m, 1H), 6.43 (s, 1H), 2.92-2.86 (m, 2H),

2.20-2.14 (m, 2H), 1.43 (s, 6H);  $^{13}\text{C}$  NMR (100 MHz,  $\text{CDCl}_3$ )  $\delta$  198.5 (d,  $J_{\text{C-F}}$  = 3.9 Hz), 165.0, 161.7 (d,  $J_{\text{C-F}}$  = 252.8 Hz), 154.6, 134.2 (d,  $J_{\text{C-F}}$  = 9.0 Hz), 130.5 (d,  $J_{\text{C-F}}$  = 2.7 Hz), 128.6, 125.8 (d,  $J_{\text{C-F}}$  = 13.0 Hz), 124.3 (d,  $J_{\text{C-F}}$  = 3.2 Hz), 123.2, 122.3, 120.4, 116.5 (d,  $J_{\text{C-F}}$  = 23.5 Hz), 110.9, 100.9, 39.4 (d,  $J_{\text{C-F}}$  = 7.1 Hz), 35.7, 35.3 (d,  $J_{\text{C-F}}$  = 1.3 Hz), 26.7;  $^{19}\text{F}$  NMR (376 MHz,  $\text{CDCl}_3$ )  $\delta$  -109.6 (s). FT-IR:  $\nu$  ( $\text{cm}^{-1}$ )  $\delta$  2930, 1683, 1582, 1479, 1404, 1388, 1255, 1165, 1111, 1004. HRMS [ESI] calcd for  $\text{C}_{20}\text{H}_{19}\text{FNaO}_2$   $[\text{M}+\text{Na}]^+$  333.1261, found 333.1269.

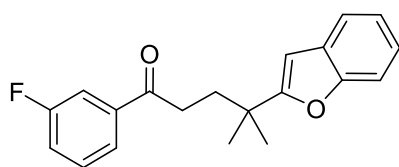

**2l**: 29.1 mg, 47% yield, yellow oil. Purification by flash column chromatography (eluent: EtOAc/Petroleum ether = 1/100-1/50).  $^1\text{H}$  NMR (400 MHz,  $\text{CDCl}_3$ )  $\delta$  7.62-7.58 (m, 1H), 7.57-7.49 (m, 2H), 7.43 (d,  $J$  = 8.0 Hz, 1H), 7.39-7.32 (m, 1H), 7.26-7.17 (m, 3H), 6.45 (s, 1H), 2.84-2.79 (m, 2H),

2.20-2.14 (m, 2H), 1.43 (s, 6H);  $^{13}\text{C}$  NMR (100 MHz,  $\text{CDCl}_3$ )  $\delta$  198.8 (d,  $J_{\text{C-F}}$  = 2.0 Hz), 164.8, 162.8 (d,  $J_{\text{C-F}}$  = 246.3 Hz), 154.6, 138.9 (d,  $J_{\text{C-F}}$  = 6.2 Hz), 130.1 (d,  $J_{\text{C-F}}$  = 7.7 Hz), 128.6, 123.8 (d,  $J_{\text{C-F}}$  = 2.9 Hz), 123.4, 122.5, 120.4, 119.9 (d,  $J_{\text{C-F}}$  = 21.5 Hz), 114.8 (d,  $J_{\text{C-F}}$  = 22.0 Hz), 110.9, 101.2, 35.9, 35.7, 34.6, 26.8;  $^{19}\text{F}$  NMR (376 MHz,  $\text{CDCl}_3$ )  $\delta$  -111.9 (s). FT-IR:  $\nu$  ( $\text{cm}^{-1}$ )  $\delta$  2968, 2362, 1734, 1653, 1541, 1487, 1444, 1367, 1255, 1200, 1110, 1006. HRMS [ESI] calcd for  $\text{C}_{20}\text{H}_{19}\text{FNaO}_2$   $[\text{M}+\text{Na}]^+$  333.1261, found 333.1253.

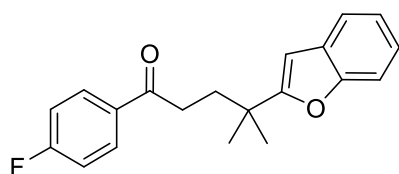

**2m**: 38.8 mg, 63% yield, yellow solid, m.p. 87-88 °C. Purification by flash column chromatography (eluent: EtOAc/Petroleum ether = 1/100-1/50).  $^1\text{H}$  NMR (400 MHz,  $\text{CDCl}_3$ )  $\delta$  7.88-7.82 (m, 2H), 7.54-7.49 (m, 1H), 7.45-7.40 (m, 1H), 7.26-7.17 (m, 2H), 7.08-7.02 (m, 2H), 6.45 (d,  $J$  =

0.8 Hz, 1H), 2.84-2.78 (m, 2H), 2.19-2.13 (m, 2H), 1.43 (s, 6H);  $^{13}\text{C}$  NMR (100 MHz,  $\text{CDCl}_3$ )  $\delta$

198.5, 165.6 (d,  $J_{C-F} = 252.8$  Hz), 164.9, 154.6, 133.2 (d,  $J_{C-F} = 3.0$  Hz), 130.6 (d,  $J_{C-F} = 9.1$  Hz), 128.6, 123.4, 122.5, 120.4, 115.5 (d,  $J_{C-F} = 21.6$  Hz), 110.9, 101.1, 35.9, 35.8, 34.4, 26.8;  $^{19}\text{F}$  NMR (376 MHz,  $\text{CDCl}_3$ )  $\delta$  -105.6 (s). FT-IR:  $\nu$  ( $\text{cm}^{-1}$ )  $\delta$  2967, 1684, 1506, 1455, 1368, 1255, 1167, 1083, 1012. HRMS [ESI] calcd for  $\text{C}_{20}\text{H}_{19}\text{FNaO}_2$   $[\text{M}+\text{Na}]^+$  333.1261, found 333.1262.

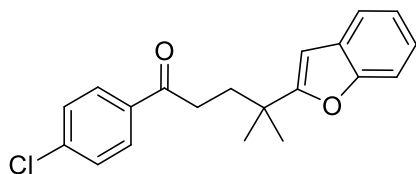

**2n:** 36.4 mg, 56% yield, yellow solid, m.p. 71-72 °C. Purification by flash column chromatography (eluent: EtOAc/Petroleum ether = 1/100-1/50).  $^1\text{H}$  NMR (400 MHz,  $\text{CDCl}_3$ )  $\delta$  7.78-7.74 (m, 2H), 7.53-7.49 (m, 1H), 7.42 (d,  $J = 8.0$  Hz, 1H), 7.37-7.33 (m, 2H), 7.25-7.17 (m, 2H), 6.45 (s, 1H), 2.83-2.77 (m, 2H), 2.19-2.12 (m, 2H), 1.43 (s, 6H);  $^{13}\text{C}$  NMR (100 MHz,  $\text{CDCl}_3$ )  $\delta$  198.9, 164.8, 154.6, 139.3, 135.0, 129.4, 128.7, 128.6, 123.4, 122.5, 120.4, 110.9, 101.2, 35.9, 35.7, 34.4, 26.8. FT-IR:  $\nu$  ( $\text{cm}^{-1}$ )  $\delta$  2975, 1682, 1585, 1464, 1371, 1255, 1214, 1111, 1067. HRMS [ESI] calcd for  $\text{C}_{20}\text{H}_{19}\text{ClNaO}_2$   $[\text{M}+\text{Na}]^+$  349.0966, found 349.0967.

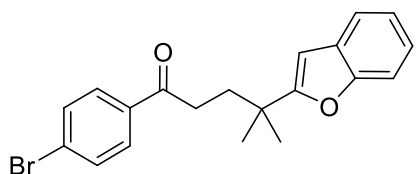

**2o:** 39.7 mg, 54% yield, yellow solid, m.p. 55-56 °C. Purification by flash column chromatography (eluent: EtOAc/Petroleum ether = 1/100-1/50).  $^1\text{H}$  NMR (400 MHz,  $\text{CDCl}_3$ )  $\delta$  7.70-7.65 (m, 2H), 7.53-7.49 (m, 3H), 7.41 (d,  $J = 8.0$  Hz, 1H), 7.26-7.17 (m, 2H), 6.44 (s, 1H), 2.82-2.76 (m, 2H), 2.18-2.12 (m, 2H), 1.42 (s, 6H);  $^{13}\text{C}$  NMR (100 MHz,  $\text{CDCl}_3$ )  $\delta$  199.1, 164.8, 154.6, 135.4, 131.7, 129.6, 128.6, 128.0, 123.4, 122.5, 120.4, 110.9, 101.2, 35.9, 35.7, 34.4, 26.8. FT-IR:  $\nu$  ( $\text{cm}^{-1}$ )  $\delta$  2957, 1682, 1558, 1452, 1396, 1255, 1206, 1179, 1064, 1009. HRMS [ESI] calcd for  $\text{C}_{20}\text{H}_{19}\text{BrNaO}_2$   $[\text{M}+\text{Na}]^+$  393.0461, found 393.0465.

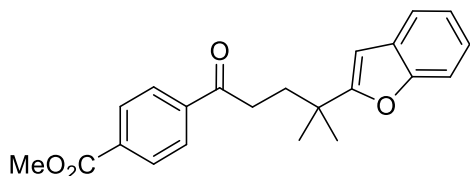

**2p:** 32.2 mg, 46% yield, yellow solid, m.p. 117-118 °C. Purification by flash column chromatography (eluent: EtOAc/Petroleum ether = 1/100-1/50).  $^1\text{H}$  NMR (400 MHz,  $\text{CDCl}_3$ )  $\delta$  8.04 (d,  $J = 8.4$  Hz, 2H), 7.87 (d,  $J = 8.0$  Hz, 2H), 7.51 (d,  $J = 7.2$  Hz, 1H), 7.42 (d,  $J = 8.0$  Hz, 1H), 7.26-7.17 (m, 2H), 6.45 (s, 1H), 3.93 (s, 3H), 2.89-2.83 (m, 2H), 2.20-2.14 (m, 2H), 1.43 (s, 6H);  $^{13}\text{C}$  NMR (100 MHz,  $\text{CDCl}_3$ )  $\delta$  199.6, 166.2, 164.8, 154.6, 140.0, 133.7, 129.7, 128.6, 127.9, 123.4, 122.5, 120.4, 110.9, 101.2, 52.4, 35.9, 35.6, 34.8, 26.8. FT-IR:  $\nu$  ( $\text{cm}^{-1}$ )  $\delta$  3419, 2975, 2160, 1977, 1715, 1642, 1504, 1456, 1370, 1193. HRMS [ESI] calcd for  $\text{C}_{22}\text{H}_{22}\text{NaO}_4$   $[\text{M}+\text{Na}]^+$  373.1410, found 373.1407.

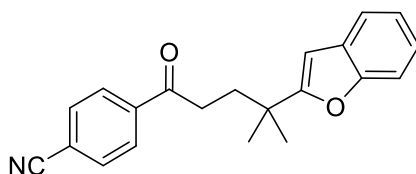

**2q:** 25.9 mg, 41% yield, yellow solid, m.p. 73-74 °C. Purification by flash column chromatography (eluent: EtOAc/Petroleum ether = 1/80-1/40).  $^1\text{H}$  NMR (400 MHz,  $\text{CDCl}_3$ )  $\delta$  7.89-7.85 (m, 2H), 7.68-7.65 (m, 2H), 7.52-7.48 (m, 1H), 7.40 (d,  $J = 7.6$  Hz, 1H), 7.26-7.17 (m, 2H), 6.44 (s, 1H), 2.87-2.81 (m, 2H), 2.19-2.14 (m, 2H), 1.43 (s, 6H);  $^{13}\text{C}$  NMR (100 MHz,  $\text{CDCl}_3$ )  $\delta$  198.6, 164.5, 154.6, 139.6, 132.3, 128.5, 128.4, 123.5, 122.6, 120.5, 117.9, 116.1, 110.8, 101.3, 35.9,

35.5, 34.8, 26.8. FT-IR:  $\nu$  ( $\text{cm}^{-1}$ )  $\delta$  2965, 1688, 1607, 1508, 1455, 1387, 1294, 1164, 1079, 1002. HRMS [ESI] calcd for  $\text{C}_{21}\text{H}_{19}\text{NNaO}_2$   $[\text{M}+\text{Na}]^+$  340.1308, found 340.1301.

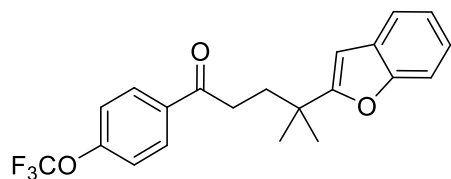

**2r:** 31.7 mg, 42% yield, yellow oil. Purification by flash column chromatography (eluent: EtOAc/Petroleum ether = 1/100-1/50).  $^1\text{H}$  NMR (400 MHz,  $\text{CDCl}_3$ )  $\delta$  7.89-7.84 (m, 2H), 7.53-7.49 (m, 1H), 7.41 (d,  $J = 7.6$  Hz, 1H), 7.26-7.23 (m, 1H), 7.23-7.17 (m, 3H), 6.45 (d,  $J = 0.8$  Hz, 1H), 2.85-2.79 (m, 2H), 2.20-2.14 (m, 2H), 1.43 (s, 6H);  $^{13}\text{C}$  NMR (100 MHz,  $\text{CDCl}_3$ )  $\delta$  198.5, 164.8, 154.6, 152.4 (q,  $J_{\text{C-F}} = 1.7$  Hz), 135.0, 130.0, 128.6, 123.4, 122.5, 120.4, 120.2, 120.2 (q,  $J_{\text{C-F}} = 257.1$  Hz), 110.9, 101.2, 35.9, 35.7, 34.5, 26.8.  $^{19}\text{F}$  NMR (376 MHz,  $\text{CDCl}_3$ )  $\delta$  -57.6 (s). FT-IR:  $\nu$  ( $\text{cm}^{-1}$ )  $\delta$  2971, 2358, 1688, 1541, 1471, 1389, 1302, 1211, 1083. HRMS [ESI] calcd for  $\text{C}_{21}\text{H}_{19}\text{F}_3\text{NaO}_3$   $[\text{M}+\text{Na}]^+$  399.1179, found 399.1176.

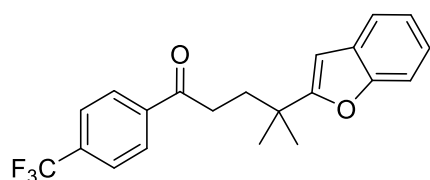

**2s:** 34.9 mg, 48% yield, yellow solid, m.p. 49-50 °C. Purification by flash column chromatography (eluent: EtOAc/Petroleum ether = 1/100-1/50).  $^1\text{H}$  NMR (400 MHz,  $\text{CDCl}_3$ )  $\delta$  7.91 (d,  $J = 8.0$  Hz, 2H), 7.64 (d,  $J = 8.0$  Hz, 2H), 7.53-7.49 (m, 1H), 7.41 (d,  $J = 7.6$  Hz, 1H), 7.26-7.17 (m, 2H), 6.45 (s, 1H), 2.89-2.83 (m, 2H), 2.21-2.15 (m, 2H), 1.44 (s, 6H);  $^{13}\text{C}$  NMR (100 MHz,  $\text{CDCl}_3$ )  $\delta$  199.1, 164.7, 154.6, 139.4, 134.2 (q,  $J_{\text{C-F}} = 32.4$  Hz), 128.6, 128.3, 125.5 (q,  $J_{\text{C-F}} = 3.6$  Hz), 123.6 (q,  $J_{\text{C-F}} = 271.0$  Hz), 123.5, 122.5, 120.5, 110.9, 101.3, 35.9, 35.6, 34.8, 26.8.  $^{19}\text{F}$  NMR (376 MHz,  $\text{CDCl}_3$ )  $\delta$  -63.1 (s). FT-IR:  $\nu$  ( $\text{cm}^{-1}$ )  $\delta$  2976, 1687, 1541, 1470, 1390, 1320, 1253, 1166, 1109, 1066, 1016. HRMS [ESI] calcd for  $\text{C}_{21}\text{H}_{19}\text{F}_3\text{NaO}_2$   $[\text{M}+\text{Na}]^+$  383.1229, found 383.1228.

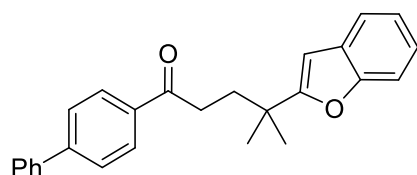

**2t:** 44.1 mg, 60% yield, white solid, m.p. 129-130 °C. Purification by flash column chromatography (eluent: EtOAc/Petroleum ether = 1/100-1/50).  $^1\text{H}$  NMR (400 MHz,  $\text{CDCl}_3$ )  $\delta$  7.94-7.90 (m, 2H), 7.64-7.59 (m, 4H), 7.55-7.52 (m, 1H), 7.50-7.44 (m, 3H), 7.43-7.37 (m, 1H), 7.28-7.19 (m, 2H), 6.48 (s, 1H), 2.92-2.85 (m, 2H), 2.25-2.18 (m, 2H), 1.46 (s, 6H);  $^{13}\text{C}$  NMR (100 MHz,  $\text{CDCl}_3$ )  $\delta$  199.7, 165.0, 154.7, 145.5, 139.9, 135.5, 128.9, 128.6, 128.6, 128.1, 127.2, 127.1, 123.4, 122.5, 120.4, 110.9, 101.1, 36.0, 35.8, 34.5, 26.8. FT-IR:  $\nu$  ( $\text{cm}^{-1}$ )  $\delta$  2959, 2925, 2217, 1977, 1675, 1604, 1576, 1453, 1301, 1255. HRMS [ESI] calcd for  $\text{C}_{26}\text{H}_{24}\text{NaO}_2$   $[\text{M}+\text{Na}]^+$  391.1669, found 391.1668.

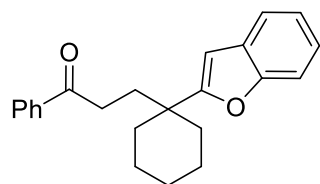

**2u:** 28.5 mg, 43% yield, yellow solid, m.p. 60-61 °C. Purification by flash column chromatography (eluent: EtOAc/Petroleum ether = 1/100-1/50).  $^1\text{H}$  NMR (400 MHz,  $\text{CDCl}_3$ )  $\delta$  7.78-7.73 (m, 2H), 7.54-7.46 (m, 2H), 7.45-7.41 (m, 1H), 7.38-7.31 (m, 2H), 7.26-7.17 (m, 2H), 6.50 (s, 1H), 2.80-2.74 (m, 2H), 2.24-2.15 (m, 2H), 2.14-2.07 (m, 2H), 1.66-1.35 (m, 8H);  $^{13}\text{C}$  NMR (100 MHz,  $\text{CDCl}_3$ )  $\delta$  200.4, 163.3, 154.4, 136.8, 132.8, 128.7, 128.4, 128.0, 123.2, 122.4, 120.3, 110.9, 103.1, 39.9, 35.0, 33.5, 26.2, 22.4. FT-IR:  $\nu$



( $\text{cm}^{-1}$ )  $\delta$  2932, 2104, 1679, 1580, 1451, 1307, 1256, 1202, 1171, 1090. HRMS [ESI] calcd for  $\text{C}_{23}\text{H}_{24}\text{NaO}_2$  [ $\text{M}+\text{Na}$ ] $^+$  355.1669, found 355.1673.

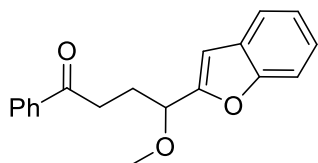

**2v**: 18.2 mg, 31% yield, yellow oil. Purification by flash column chromatography (eluent: EtOAc/Petroleum ether = 1/100-1/50).  $^1\text{H}$  NMR (400 MHz,  $\text{CDCl}_3$ )  $\delta$  7.97-7.93 (m, 2H), 7.58-7.52 (m, 2H), 7.50-7.42 (m, 3H), 7.31-7.20 (m, 2H), 6.69 (s, 1H), 4.48 (dd,  $J$  = 7.6, 6.0 Hz, 1H), 3.35 (s, 3H), 3.20-3.05 (m, 2H), 2.48-2.31 (m, 2H);  $^{13}\text{C}$  NMR (100 MHz,  $\text{CDCl}_3$ )  $\delta$  199.5, 156.5, 155.0, 136.9, 133.0, 128.5, 128.0, 127.9, 124.2, 122.8, 121.0, 111.4, 104.8, 76.1, 56.9, 34.1, 28.5. FT-IR:  $\nu$  ( $\text{cm}^{-1}$ )  $\delta$  2933, 1678, 1581, 1454, 1353, 1279, 1199, 1097, 1022. HRMS [ESI] calcd for  $\text{C}_{19}\text{H}_{18}\text{NaO}_3$  [ $\text{M}+\text{Na}$ ] $^+$  317.1148, found 317.1156.

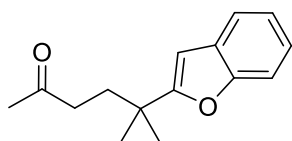

**2w**: 16.2 mg, 35% yield, yellow oil. Purification by flash column chromatography (eluent: EtOAc/Petroleum ether = 1/100-1/50).  $^1\text{H}$  NMR (400 MHz,  $\text{CDCl}_3$ )  $\delta$  7.52-7.48 (m, 1H), 7.44-7.40 (m, 1H), 7.25-7.16 (m, 2H), 6.39 (s, 1H), 2.34-2.28 (m, 2H), 2.07 (s, 3H), 2.02-1.96 (m, 2H), 1.36 (s, 6H);  $^{13}\text{C}$  NMR (100 MHz,  $\text{CDCl}_3$ )  $\delta$  208.6, 165.0, 154.6, 128.6, 123.3, 122.4, 120.4, 110.9, 100.9, 39.5, 35.6, 34.9, 29.9, 26.7. FT-IR:  $\nu$  ( $\text{cm}^{-1}$ )  $\delta$  2968, 2361, 1716, 1653, 1541, 1471, 1387, 1301, 1204, 1166, 1083. HRMS [ESI] calcd for  $\text{C}_{15}\text{H}_{19}\text{O}_2$  [ $\text{M}+\text{H}$ ] $^+$  231.1380, found 231.1382.

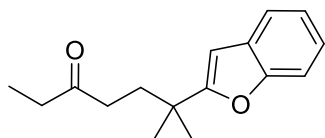

**2x**: 17.6 mg, 36% yield, yellow oil. Purification by flash column chromatography (eluent: EtOAc/Petroleum ether = 1/100-1/50).  $^1\text{H}$  NMR (400 MHz,  $\text{CDCl}_3$ )  $\delta$  7.49 (d,  $J$  = 7.2 Hz, 1H), 7.42 (d,  $J$  = 7.6 Hz, 1H), 7.25-7.15 (m, 2H), 6.39 (s, 1H), 2.38-2.31 (m, 2H), 2.31-2.24 (m, 2H), 2.03-1.96 (m, 2H), 1.36 (s, 6H), 0.99 (t,  $J$  = 7.2 Hz, 3H);  $^{13}\text{C}$  NMR (100 MHz,  $\text{CDCl}_3$ )  $\delta$  211.3, 165.1, 154.6, 128.6, 123.3, 122.4, 120.3, 110.9, 100.8, 38.1, 35.9, 35.7, 35.0, 26.7, 7.8. FT-IR:  $\nu$  ( $\text{cm}^{-1}$ )  $\delta$  2969, 1714, 1580, 1454, 1388, 1254, 1167, 1111, 1008. HRMS [ESI] calcd for  $\text{C}_{16}\text{H}_{20}\text{NaO}_2$  [ $\text{M}+\text{Na}$ ] $^+$  267.1356, found 267.1362.

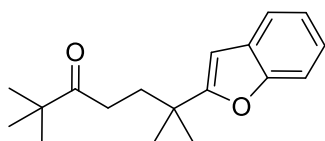

**2y**: 25.5 mg, 47% yield, yellow oil. Purification by flash column chromatography (eluent: EtOAc/Petroleum ether = 1/100-1/50).  $^1\text{H}$  NMR (400 MHz,  $\text{CDCl}_3$ )  $\delta$  7.52-7.48 (m, 1H), 7.44-7.40 (m, 1H), 7.25-7.16 (m, 2H), 6.40 (d,  $J$  = 0.8 Hz, 1H), 2.39-2.34 (m, 2H), 2.01-1.96 (m, 2H), 1.37 (s, 6H), 1.07 (s, 9H);  $^{13}\text{C}$  NMR (100 MHz,  $\text{CDCl}_3$ )  $\delta$  215.7, 165.3, 154.6, 128.6, 123.2, 122.3, 120.3, 110.8, 100.7, 44.3, 35.8, 35.4, 32.1, 26.8, 26.4. FT-IR:  $\nu$  ( $\text{cm}^{-1}$ )  $\delta$  2966, 1704, 1581, 1470, 1388, 1300, 1204, 1111, 1081, 1049. HRMS [ESI] calcd for  $\text{C}_{18}\text{H}_{24}\text{NaO}_2$  [ $\text{M}+\text{Na}$ ] $^+$  295.1669, found 295.1673.

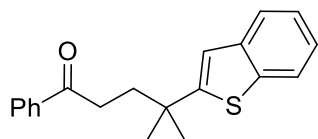

**2z**: 19.7 mg, 32% yield, yellow solid, m.p. 52-53  $^{\circ}\text{C}$ . Purification by flash column chromatography (eluent: EtOAc/Petroleum ether = 1/100-1/50).  $^1\text{H}$  NMR (400 MHz,  $\text{CDCl}_3$ )  $\delta$  7.88-7.84 (m, 2H), 7.78 (d,  $J$  = 7.6 Hz, 1H), 7.70 (d,  $J$  = 8.0 Hz, 1H), 7.54-7.48 (m, 1H), 7.42-7.36 (m, 2H), 7.35-7.24 (m, 2H), 7.07 (s, 1H), 2.91-2.86 (m, 2H), 2.20-2.14 (m, 2H), 1.51 (s,

6H);  $^{13}\text{C}$  NMR (100 MHz,  $\text{CDCl}_3$ )  $\delta$  200.1, 155.5, 139.9, 139.1, 136.8, 132.9, 128.5, 128.0, 124.1, 123.6, 123.0, 122.2, 119.2, 38.9, 37.7, 34.5, 29.9. FT-IR:  $\nu$  ( $\text{cm}^{-1}$ )  $\delta$  2962, 1678, 1579, 1412, 1319, 1298, 1179, 1074. HRMS [ESI] calcd for  $\text{C}_{20}\text{H}_{20}\text{NaOS}$  [ $\text{M}+\text{Na}$ ] $^+$  331.1127, found 331.1132.

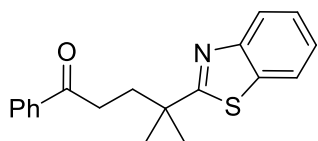

**2aa:** 31.2 mg, 50% yield, yellow oil. Purification by flash column chromatography (eluent: EtOAc/Petroleum ether = 1/100-1/50).  $^1\text{H}$  NMR (400 MHz,  $\text{CDCl}_3$ )  $\delta$  8.00 (d,  $J$  = 8.0 Hz, 1H), 7.91-7.88 (m, 2H), 7.88-7.85 (m, 1H), 7.54-7.48 (m, 1H), 7.48-7.43 (m, 1H), 7.43-7.37 (m, 2H), 7.37-7.33 (m, 1H), 2.99-2.93 (m, 2H), 2.32-2.27 (m, 2H), 1.58 (s, 6H);  $^{13}\text{C}$  NMR (100 MHz,  $\text{CDCl}_3$ )  $\delta$  199.8, 179.9, 153.1, 136.8, 135.0, 132.9, 128.5, 128.1, 125.8, 124.7, 122.8, 121.5, 41.1, 37.9, 34.3, 28.8. FT-IR:  $\nu$  ( $\text{cm}^{-1}$ )  $\delta$  2927, 2329, 1680, 1578, 1490, 1388, 1276, 1181, 1083, 1013. HRMS [ESI] calcd for  $\text{C}_{19}\text{H}_{20}\text{NOS}$  [ $\text{M}+\text{H}$ ] $^+$  310.1260, found 310.1265.

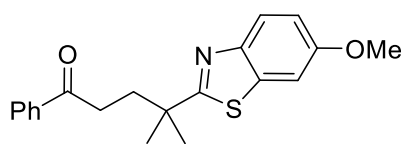

**2ab:** 30.6 mg, 45% yield, yellow solid, m.p. 50-51  $^{\circ}\text{C}$ . Purification by flash column chromatography (eluent: Acetone/Petroleum ether = 1/100-1/50).  $^1\text{H}$  NMR (400 MHz,  $\text{CDCl}_3$ )  $\delta$  7.91-7.84 (m, 3H), 7.54-7.48 (m, 1H), 7.43-7.37 (m, 2H), 7.32 (d,  $J$  = 2.4 Hz, 1H), 7.05 (dd,  $J$  = 8.8, 2.4 Hz, 1H), 3.87 (s, 3H), 2.98-2.92 (m, 2H), 2.28-2.23 (m, 2H), 1.55 (s, 6H);  $^{13}\text{C}$  NMR (100 MHz,  $\text{CDCl}_3$ )  $\delta$  199.9, 177.3, 157.3, 147.5, 136.8, 136.3, 132.9, 128.5, 128.1, 123.2, 115.0, 104.2, 55.8, 40.9, 37.9, 34.3, 28.7. FT-IR:  $\nu$  ( $\text{cm}^{-1}$ )  $\delta$  2923, 1682, 1579, 1447, 1386, 1293, 1217, 1156, 1032. HRMS [ESI] calcd for  $\text{C}_{20}\text{H}_{21}\text{NNaO}_2\text{S}$  [ $\text{M}+\text{Na}$ ] $^+$  362.1185, found 362.1181.

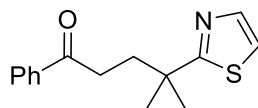

**2ac:** 27.5 mg, 53% yield, yellow solid, m.p. 55-56  $^{\circ}\text{C}$ . Purification by flash column chromatography (eluent: EtOAc/Petroleum ether = 1/100-1/50).  $^1\text{H}$  NMR (400 MHz,  $\text{CDCl}_3$ )  $\delta$  7.90-7.86 (m, 2H), 7.70 (d,  $J$  = 3.6 Hz, 1H), 7.55-7.49 (m, 1H), 7.44-7.38 (m, 2H), 7.23 (d,  $J$  = 3.2 Hz, 1H), 2.92-2.87 (m, 2H), 2.22-2.17 (m, 2H), 1.51 (s, 6H);  $^{13}\text{C}$  NMR (100 MHz,  $\text{CDCl}_3$ )  $\delta$  199.9, 179.4, 142.0, 136.8, 132.9, 128.5, 128.0, 118.0, 40.2, 38.1, 34.2, 28.9. FT-IR:  $\nu$  ( $\text{cm}^{-1}$ )  $\delta$  2962, 1733, 1677, 1580, 1541, 1472, 1413, 1370, 1255, 1210, 1155, 1040. HRMS [ESI] calcd for  $\text{C}_{15}\text{H}_{17}\text{NNaOS}$  [ $\text{M}+\text{Na}$ ] $^+$  282.0923, found 282.0930.

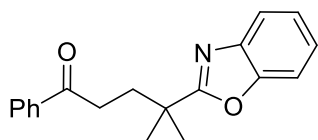

**2ad:** 35.1 mg, 60% yield, yellow solid, m.p. 61-62  $^{\circ}\text{C}$ . Purification by flash column chromatography (eluent: EtOAc/Petroleum ether = 1/100-1/50).  $^1\text{H}$  NMR (400 MHz,  $\text{CDCl}_3$ )  $\delta$  7.88 (d,  $J$  = 7.6 Hz, 2H), 7.73-7.67 (m, 1H), 7.54-7.46 (m, 2H), 7.43-7.37 (m, 2H), 7.34-7.27 (m, 2H), 2.98-2.91 (m, 2H), 2.32-2.24 (m, 2H), 1.55 (s, 6H);  $^{13}\text{C}$  NMR (100 MHz,  $\text{CDCl}_3$ )  $\delta$  199.5, 171.9, 150.8, 141.1, 136.7, 133.0, 128.5, 128.0, 124.6, 124.1, 119.8, 110.4, 37.1, 35.6, 34.2, 26.5. FT-IR:  $\nu$  ( $\text{cm}^{-1}$ )  $\delta$  2935, 1679, 1596, 1456, 1394, 1283, 1212, 1182, 1137, 1027, 1002. HRMS [ESI] calcd for  $\text{C}_{19}\text{H}_{19}\text{NNaO}_2$  [ $\text{M}+\text{Na}$ ] $^+$  316.1308, found 316.1306.

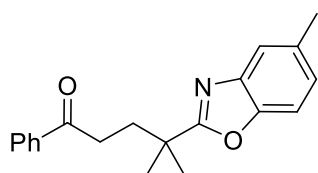

**2ae:** 19.5 mg, 32% yield, yellow oil. Purification by flash column chromatography (eluent: EtOAc/Petroleum ether = 1/100-1/50).  $^1\text{H}$  NMR (400 MHz,  $\text{CDCl}_3$ )  $\delta$  7.89-7.86 (m, 2H), 7.54-7.47 (m, 2H),

7.43-7.33 (m, 3H), 7.13-7.09 (m, 1H), 2.96-2.90 (m, 2H), 2.46 (s, 3H), 2.29-2.23 (m, 2H), 1.54 (s, 6H);  $^{13}\text{C}$  NMR (100 MHz,  $\text{CDCl}_3$ )  $\delta$  199.6, 172.0, 149.0, 141.3, 136.8, 133.9, 133.0, 128.5, 128.0, 125.6, 119.7, 109.8, 37.1, 35.7, 34.3, 26.5, 21.4. FT-IR:  $\nu$  ( $\text{cm}^{-1}$ )  $\delta$  2970, 1683, 1565, 1474, 1371, 1307, 1277, 1208, 1156, 1021. HRMS [ESI] calcd for  $\text{C}_{20}\text{H}_{21}\text{NNaO}_2$  [ $\text{M}+\text{Na}$ ] $^+$  330.1465, found 330.1462.

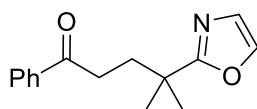

**2af:** 16.9 mg, 35% yield, yellow oil. Purification by flash column chromatography (eluent: EtOAc/Petroleum ether = 1/100-1/50).  $^1\text{H}$  NMR (400 MHz,  $\text{CDCl}_3$ )  $\delta$  7.91-7.87 (m, 2H), 7.58 (d,  $J$  = 0.8 Hz, 1H), 7.56-7.50 (m, 1H), 7.45-7.40 (m, 2H), 7.02 (d,  $J$  = 0.4 Hz, 1H), 2.90-2.84 (m, 2H), 2.17-2.12 (m, 2H), 1.44 (s, 6H);  $^{13}\text{C}$  NMR (100 MHz,  $\text{CDCl}_3$ )  $\delta$  199.7, 169.8, 138.3, 136.8, 132.9, 128.5, 128.0, 126.6, 36.6, 35.9, 34.2, 26.5. FT-IR:  $\nu$  ( $\text{cm}^{-1}$ )  $\delta$  2968, 1676, 1562, 1413, 1392, 1262, 1181, 1029. HRMS [ESI] calcd for  $\text{C}_{15}\text{H}_{17}\text{NNaO}_2$  [ $\text{M}+\text{Na}$ ] $^+$  266.1151, found 266.1156.

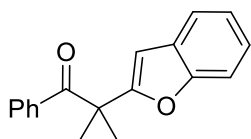

**2ag:** 10.6 mg, 20% yield, yellow oil. Purification by flash column chromatography (eluent: EtOAc/Petroleum ether = 1/100-1/50).  $^1\text{H}$  NMR (400 MHz,  $\text{CDCl}_3$ )  $\delta$  7.64-7.60 (m, 2H), 7.57-7.53 (m, 1H), 7.41-7.35 (m, 2H), 7.26-7.20 (m, 4H), 6.65 (s, 1H), 1.71 (s, 6H);  $^{13}\text{C}$  NMR (100 MHz,  $\text{CDCl}_3$ )  $\delta$  200.9, 161.6, 154.7, 136.5, 131.9, 128.7, 128.4, 128.2, 123.9, 122.8, 120.8, 111.3, 101.7, 48.4, 25.7. FT-IR:  $\nu$  ( $\text{cm}^{-1}$ )  $\delta$  2928, 1717, 1654, 1558, 1508, 1464, 1364, 1251, 1168, 1110, 1003. HRMS [ESI] calcd for  $\text{C}_{18}\text{H}_{16}\text{NaO}_2$  [ $\text{M}+\text{Na}$ ] $^+$  287.1043, found 287.1040.

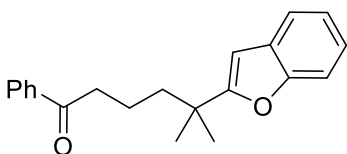

**2ai:** 15.4 mg, 25% yield, yellow oil. Purification by flash column chromatography (eluent: EtOAc/Petroleum ether = 1/100-1/50).  $^1\text{H}$  NMR (400 MHz,  $\text{CDCl}_3$ )  $\delta$  7.90-7.85 (m, 2H), 7.55-7.46 (m, 2H), 7.44-7.38 (m, 3H), 7.23-7.14 (m, 2H), 6.40 (d,  $J$  = 0.8 Hz, 1H), 2.90 (t,  $J$  = 7.2 Hz, 2H), 1.82-1.76 (m, 2H), 1.70-1.62 (m, 2H), 1.39 (s, 6H);  $^{13}\text{C}$  NMR (100 MHz,  $\text{CDCl}_3$ )  $\delta$  200.1, 165.8, 154.6, 137.0, 132.8, 128.8, 128.5, 127.9, 123.1, 122.3, 120.3, 110.8, 100.6, 41.1, 38.8, 36.2, 26.7, 19.5. FT-IR:  $\nu$  ( $\text{cm}^{-1}$ )  $\delta$  2965, 1684, 1580, 1408, 1363, 1254, 1208, 1110, 1002. HRMS [ESI] calcd for  $\text{C}_{21}\text{H}_{22}\text{NaO}_2$  [ $\text{M}+\text{Na}$ ] $^+$  329.1512, found 329.1513.

## 5. Synthetic applications

### a. construction of ring-fused heterocycle

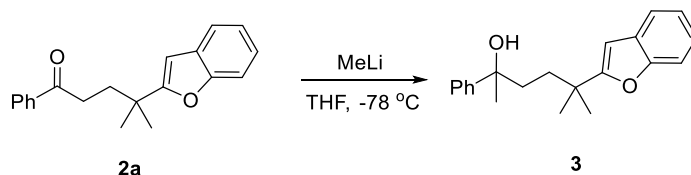

To a stirred solution of **2a** (0.5 mmol, 1.0 equiv.) at  $-78$  °C in dry THF (5.0 mL), MeLi (1.3 M, 0.55 mmol, 1.1 equiv.) was added dropwise. The mixture was stirred for an additional 1 h at  $-78$  °C. The flask was moved to the ice bath overnight, during which time the reaction warmed up to room temperature. After workup with water, the crude material was extracted with EtOAc. The

combined organic extracts were washed by brine, dried over anhydrous  $\text{Na}_2\text{SO}_4$ , filtered, concentrated, and purified by flash column chromatography on silica gel to afford the product as yellow oil.

**3**: 136.2 mg, 88% yield, yellow oil.  $^1\text{H}$  NMR (400 MHz,  $\text{CDCl}_3$ )  $\delta$  7.48-7.44 (m, 1H), 7.39-7.35 (m, 1H), 7.34-7.25 (m, 4H), 7.24-7.13 (m, 3H), 6.30 (d,  $J = 0.8$  Hz, 1H), 1.72-1.62 (m, 4H), 1.47 (s, 3H), 1.29 (s, 3H), 1.27 (s, 3H);  $^{13}\text{C}$  NMR (100 MHz,  $\text{CDCl}_3$ )  $\delta$  165.6, 154.5, 147.5, 128.7, 128.1, 126.5, 124.7, 123.1, 122.3, 120.3, 110.8, 100.7, 74.5, 38.8, 35.8, 35.5, 30.5, 26.8, 26.6. FT-IR:  $\nu$  ( $\text{cm}^{-1}$ )  $\delta$  2968, 1580, 1470, 1295, 1167, 1066, 1028, 1008. HRMS [ESI] calcd for  $\text{C}_{21}\text{H}_{24}\text{NaO}_2$  [ $\text{M}+\text{Na}$ ] $^+$  331.1669, found 331.1666.

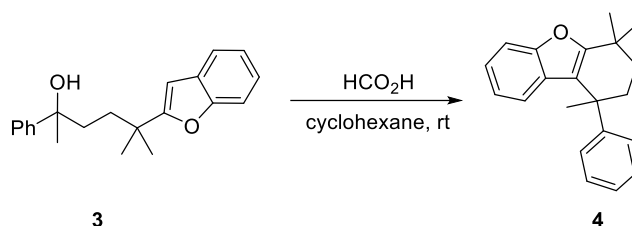

Alcohol **3** (123.2 mg, 0.4 mmol) was dissolved in cyclohexane (1.5 mL), and formic acid (98%) (0.1 mL) was added. The mixture was stirred vigorously for 3 h at room temperature under inert atmosphere. Ice water was added, the aqueous layer was extracted with ether. The combined extracts were washed with 5%  $\text{NaHCO}_3$  solution and brine, dried over anhydrous  $\text{Na}_2\text{SO}_4$ , filtered, concentrated, and purified by flash column chromatography on silica gel to afford the product as a yellow oil.

**4**: 110.3 mg, 95% yield, yellow oil.  $^1\text{H}$  NMR (400 MHz,  $\text{CDCl}_3$ )  $\delta$  7.51-7.47 (m, 1H), 7.32-7.26 (m, 4H), 7.25-7.19 (m, 2H), 7.12-7.04 (m, 2H), 2.15-2.07 (m, 1H), 2.06-1.97 (m, 1H), 1.84 (s, 3H), 1.77-1.69 (m, 1H), 1.67-1.59 (m, 1H), 1.44 (s, 3H), 1.42 (s, 3H);  $^{13}\text{C}$  NMR (100 MHz,  $\text{CDCl}_3$ )  $\delta$  160.7, 154.5, 148.2, 128.1, 127.7, 126.7, 125.8, 122.8, 121.9, 120.8, 117.4, 111.0, 40.5, 39.0, 35.7, 32.4, 27.8, 27.3, 27.2. FT-IR:  $\nu$  ( $\text{cm}^{-1}$ )  $\delta$  2964, 1609, 1452, 1361, 1242, 1170, 1123, 1108, 1026. HRMS [EI] calcd for  $\text{C}_{21}\text{H}_{22}\text{O}$  [ $\text{M}$ ] $^+$  290.1671, found 290.1672.

#### b. Beckmann rearrangement

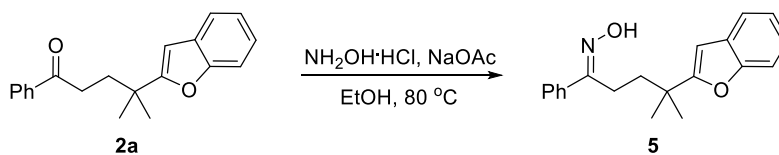

To a mixture of hydroxylamine hydrochloride (0.4 mmol, 2.0 equiv.), NaOAc (0.8 mmol, 4.0 equiv.), EtOH (2.0 mL) was added **2a** (0.2 mmol, 1.0 equiv.), and the mixture was stirred at 80 °C for 3 h. The reaction mixture was cooled down to room temperature, and then EtOH was removed under reduced pressure. The resulting mixture was extracted with EtOAc. The combined organic extracts were washed by brine, dried over anhydrous  $\text{Na}_2\text{SO}_4$ , filtered, concentrated, and purified by flash column chromatography on silica gel to afford the product as a white solid.

**5**: 56.7 mg, 92% yield, white solid, m.p. 115-116 °C.  $^1\text{H}$  NMR (400 MHz,  $\text{CDCl}_3$ )  $\delta$  8.97 (br, 1H), 7.51-7.47 (m, 1H), 7.47-7.40 (m, 3H), 7.34-7.23 (m, 3H), 7.23-7.15 (m, 2H), 6.44 (d,  $J = 0.4$  Hz, 1H), 2.69-2.63 (m, 2H), 1.99-1.93 (m, 2H), 1.41 (s, 6H);  $^{13}\text{C}$  NMR (100 MHz,  $\text{CDCl}_3$ )  $\delta$  165.1, 159.5, 154.6, 135.3, 129.2, 128.7, 128.5, 126.1, 123.3, 122.4, 120.4, 110.8, 101.2, 37.3, 36.5, 26.5,

22.0. FT-IR:  $\nu$  (cm<sup>-1</sup>)  $\delta$  2925, 1454, 1324, 1304, 1252, 1166, 1081. HRMS [ESI] calcd for C<sub>20</sub>H<sub>22</sub>NO<sub>2</sub> [M+H]<sup>+</sup> 308.1645, found 308.1643.

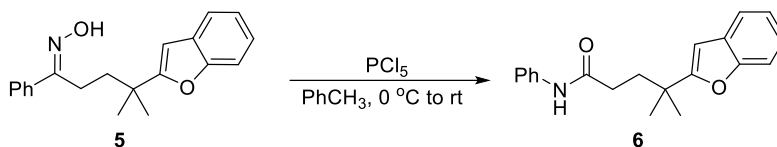

To a solution of **5** (0.2 mmol, 1.0 equiv.) in toluene (2.0 mL) was added PCl<sub>5</sub> (0.4 mmol, 2.0 equiv.) at 0 °C. After ambient temperature was reached, the reaction mixture was stirred for 4 h, diluted with water and extracted with DCM. Organic layers were washed with 1 M KHSO<sub>4</sub> solution, saturated NaHCO<sub>3</sub> solution, brine, dried over anhydrous Na<sub>2</sub>SO<sub>4</sub>, filtered, concentrated, and purified by flash column chromatography on silica gel to afford the product as a yellow solid.

**6**: 31.3 mg, 51% yield, yellow solid, m.p. 116-117 °C. <sup>1</sup>H NMR (400 MHz, CDCl<sub>3</sub>)  $\delta$  7.52-7.48 (m, 1H), 7.45-7.40 (m, 3H), 7.30-7.24 (m, 2H), 7.23-7.16 (m, 2H), 7.10-7.04 (m, 2H), 6.42 (s, 1H), 2.22-2.11 (m, 4H), 1.40 (s, 6H); <sup>13</sup>C NMR (100 MHz, CDCl<sub>3</sub>)  $\delta$  171.0, 164.9, 154.6, 137.8, 128.9, 128.6, 124.1, 123.4, 122.5, 120.4, 119.6, 111.0, 101.1, 36.8, 35.9, 33.5, 26.7. FT-IR:  $\nu$  (cm<sup>-1</sup>)  $\delta$  2922, 1680, 1598, 1488, 1387, 1304, 1208, 1139, 1081. HRMS [ESI] calcd for C<sub>20</sub>H<sub>21</sub>NNaO<sub>2</sub> [M+Na]<sup>+</sup> 330.1465, found 330.1455.

## 6. <sup>1</sup>H, <sup>13</sup>C and <sup>19</sup>F NMR spectra

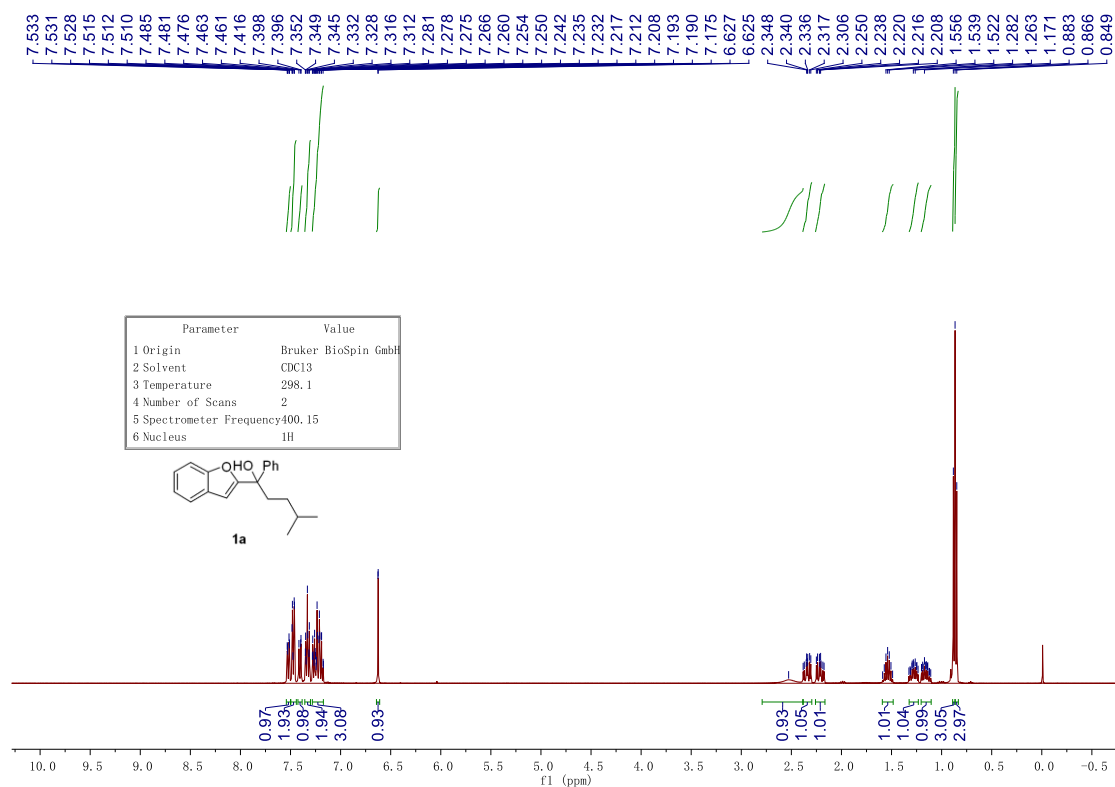

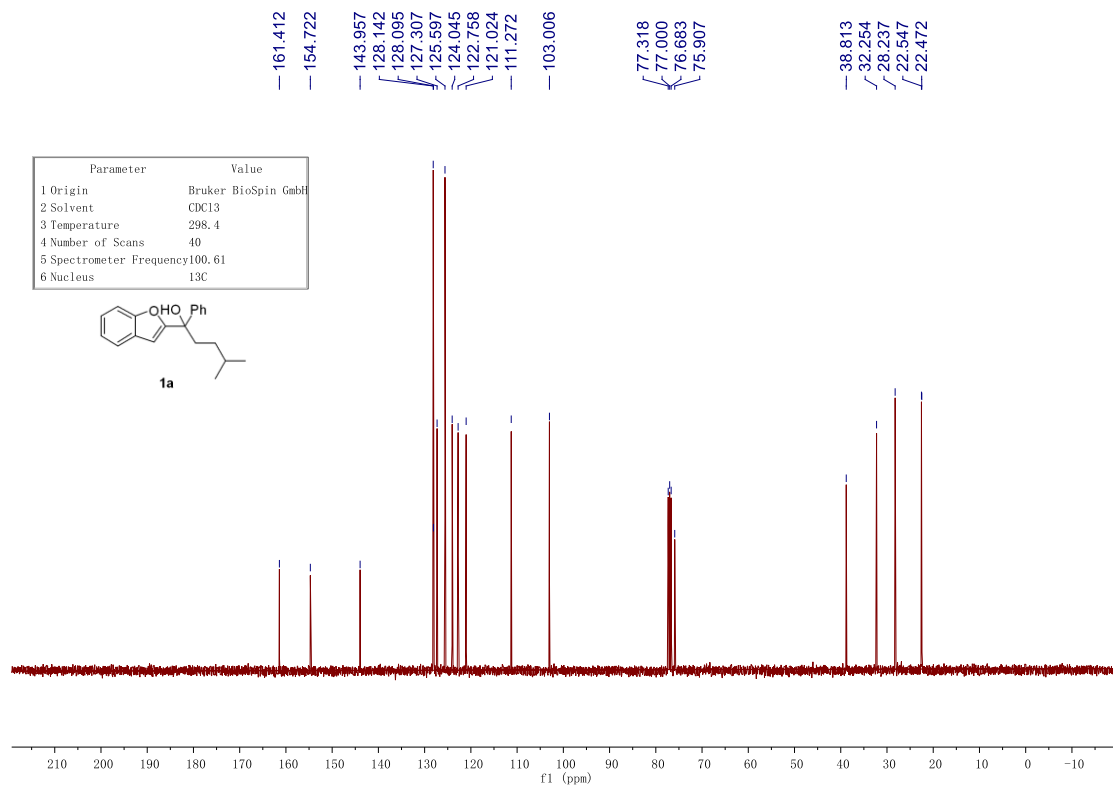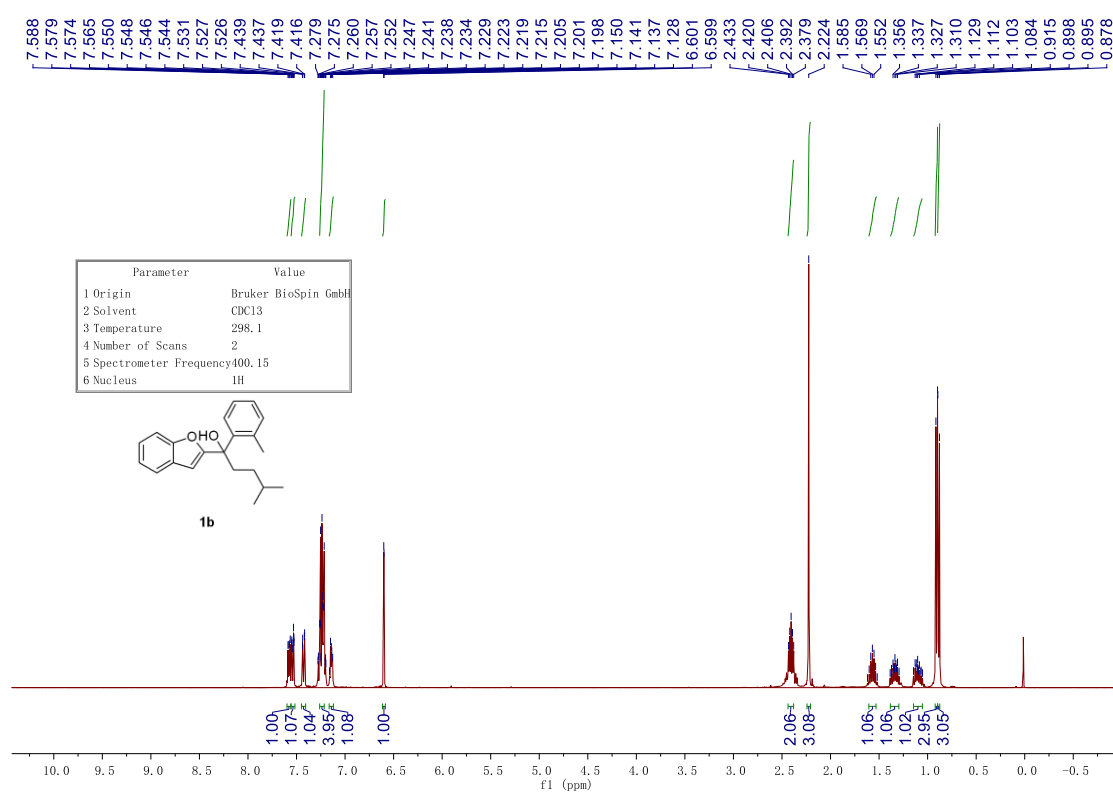

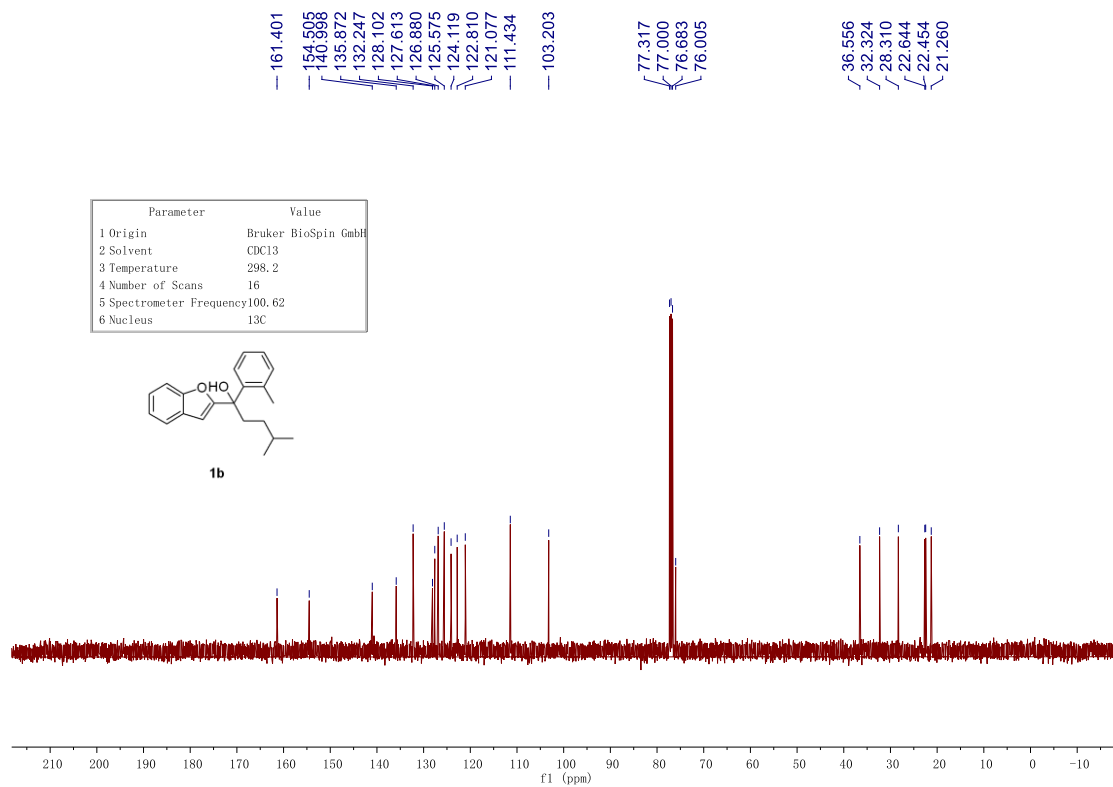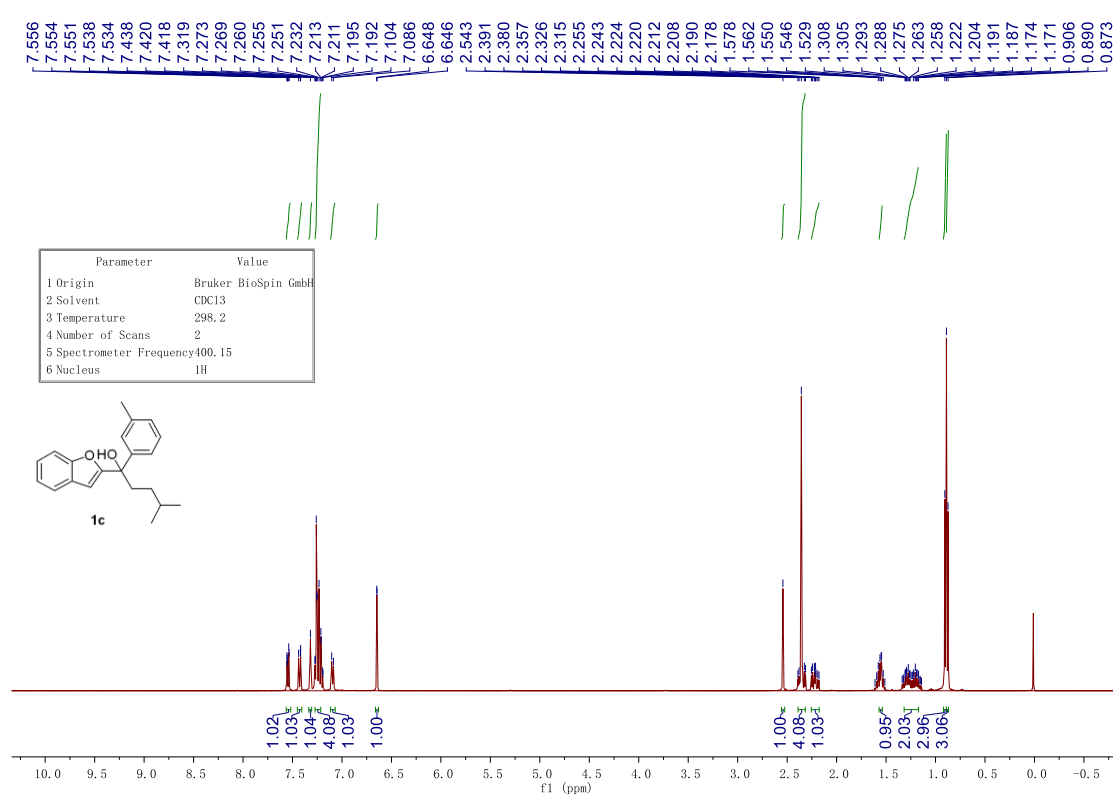

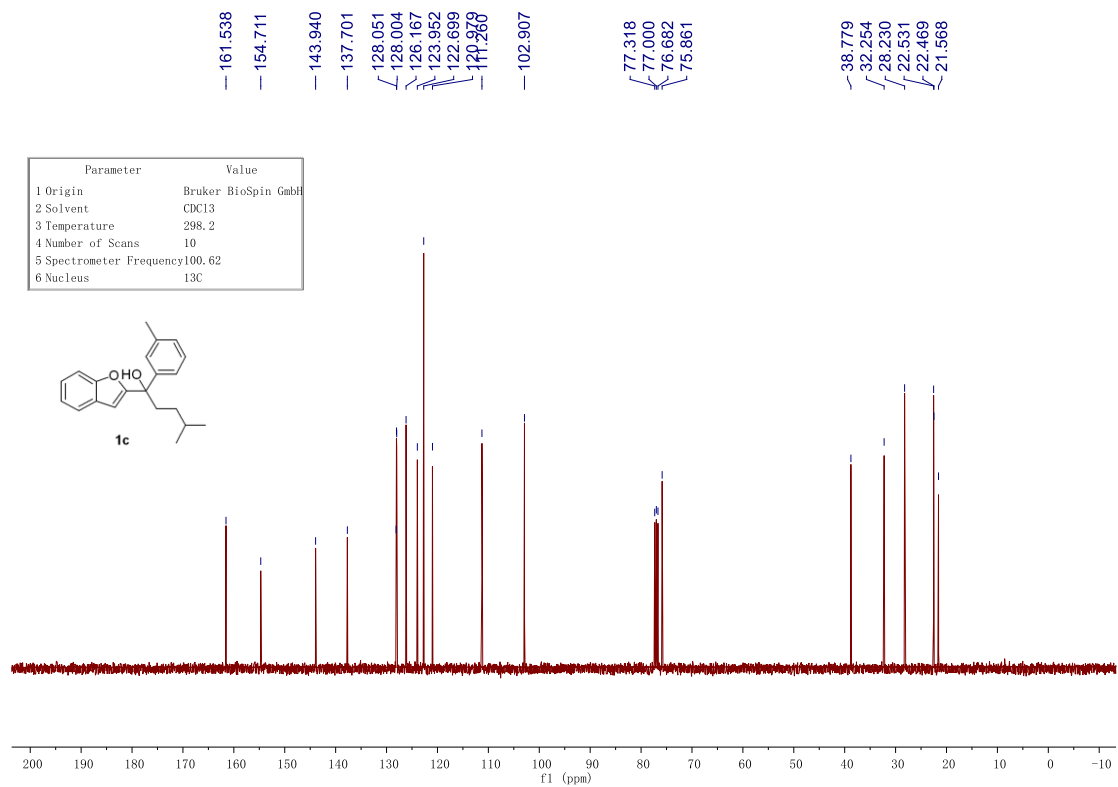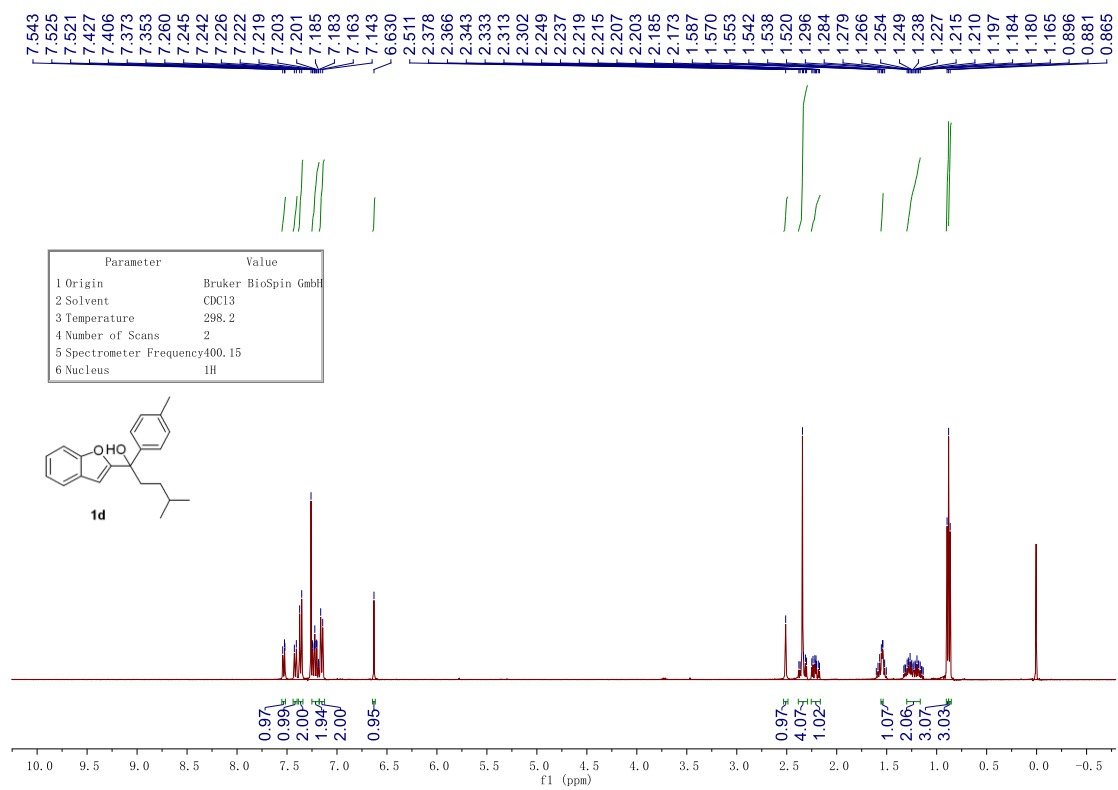



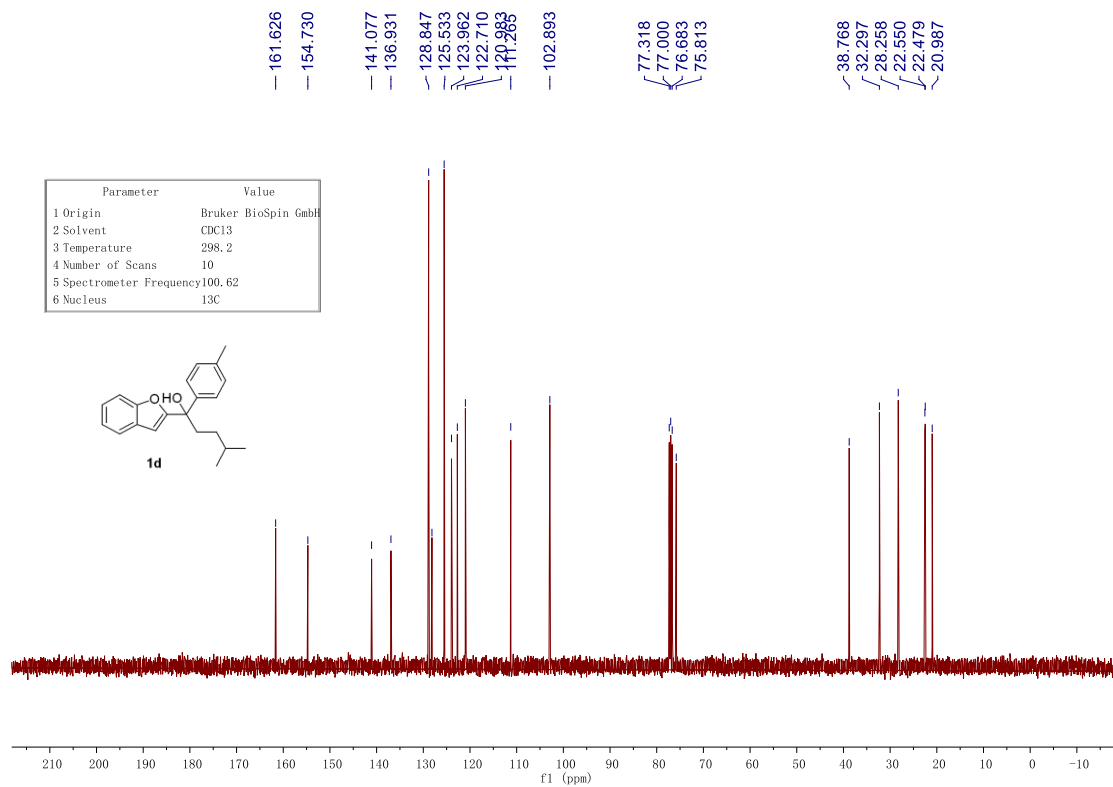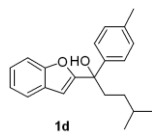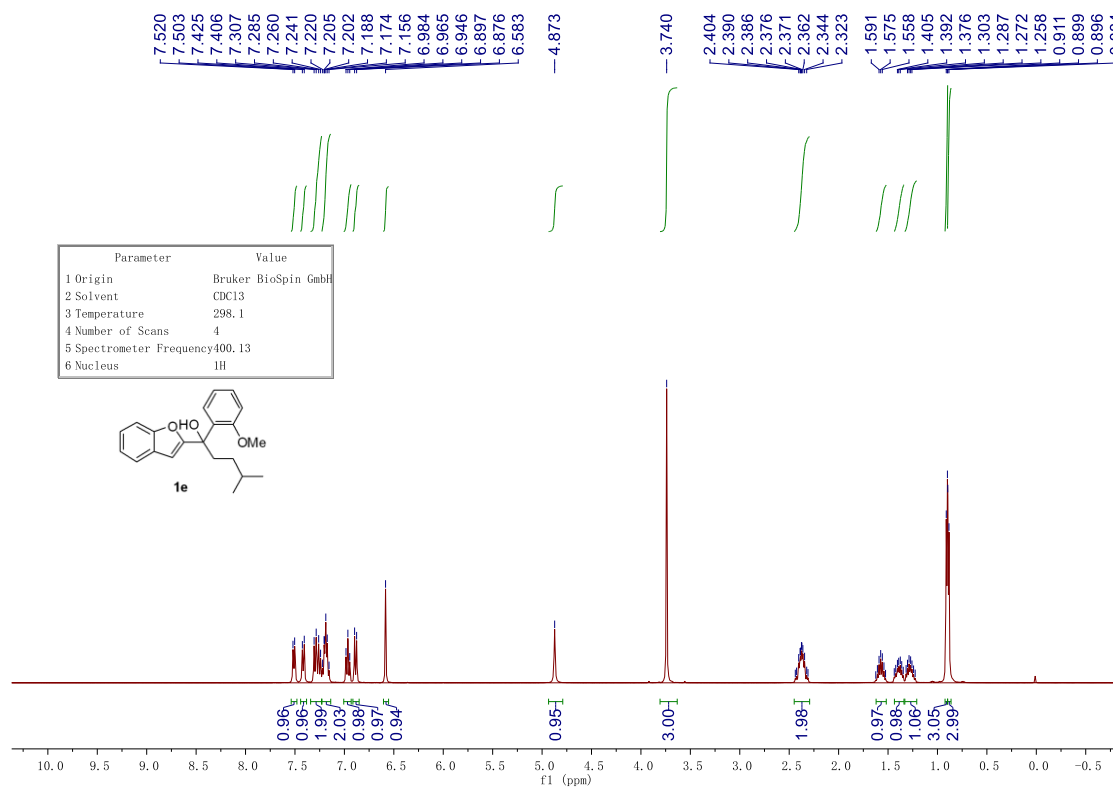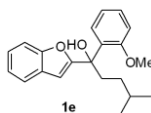

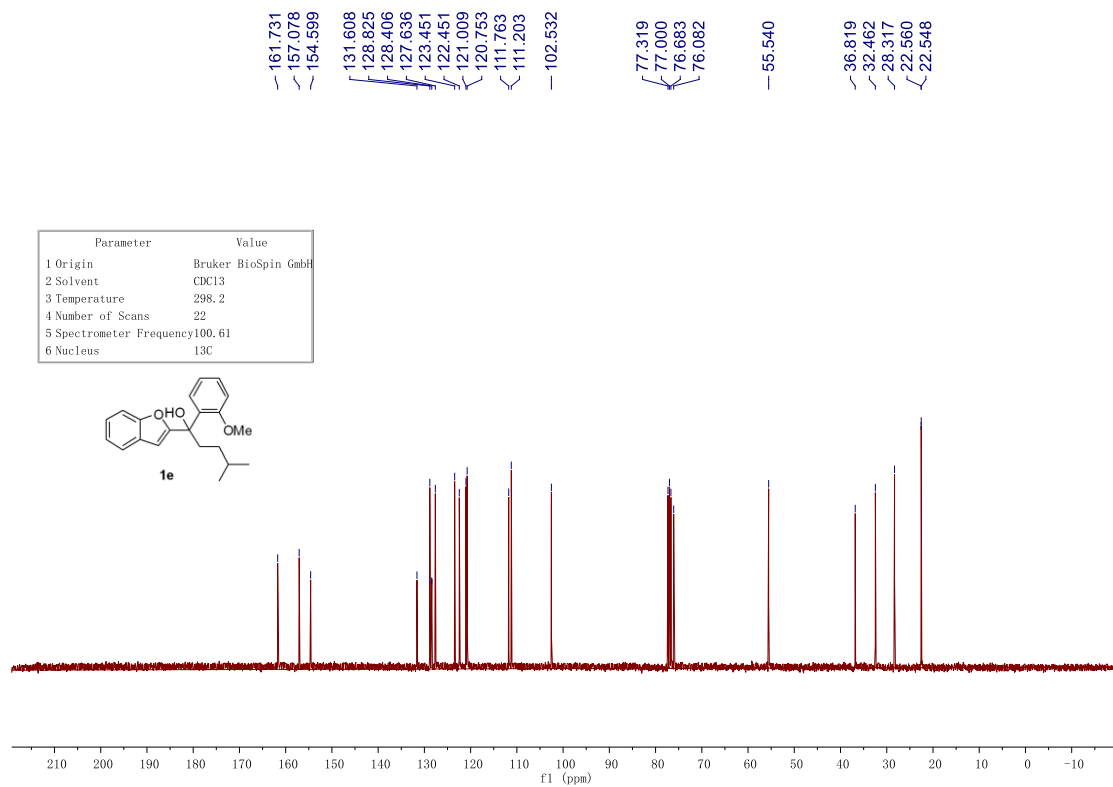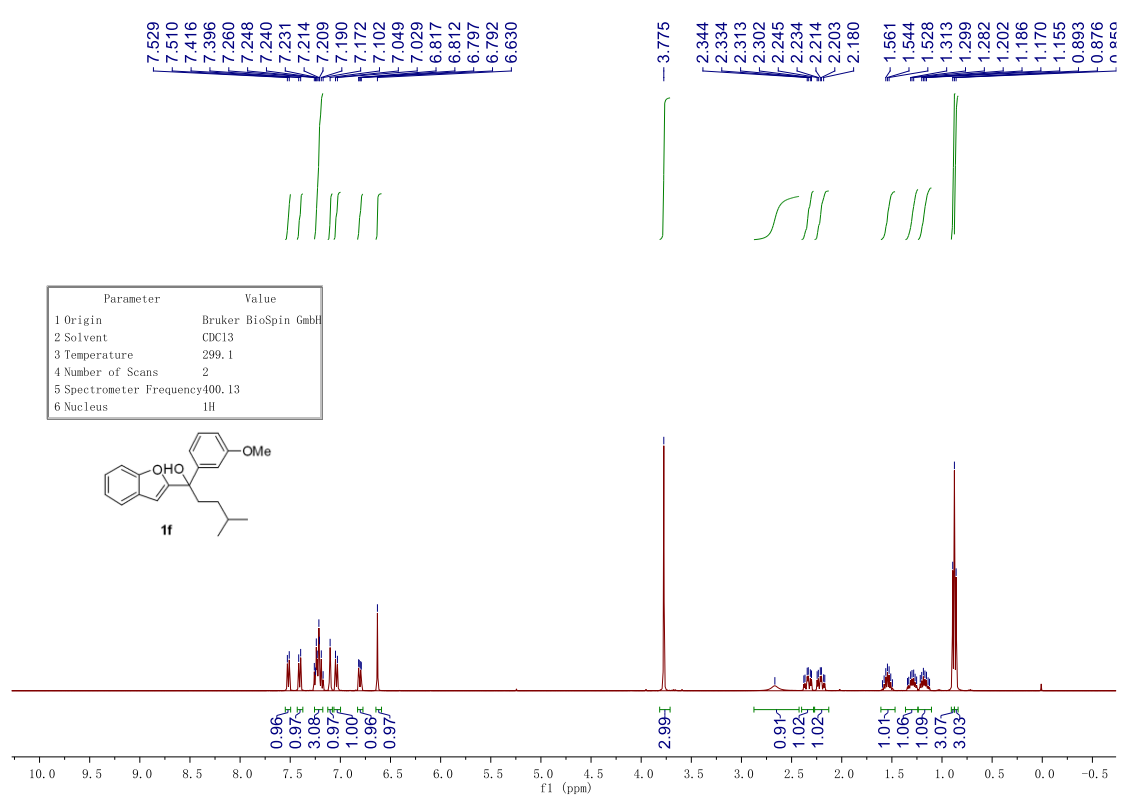

161.301  
 159.473  
 154.701  
 145.699  
 129.118  
 128.083  
 124.035  
 122.739  
 121.020  
 118.051  
 112.415  
 111.729  
 111.256  
 102.943  
 77.317  
 77.000  
 76.682  
 75.817  
 55.154  
 38.796  
 32.218  
 28.224  
 22.537  
 22.464

| Parameter                | Value               |
|--------------------------|---------------------|
| 1 Origin                 | Bruker BioSpin GmbH |
| 2 Solvent                | CDCl3               |
| 3 Temperature            | 299.1               |
| 4 Number of Scans        | 20                  |
| 5 Spectrometer Frequency | 100.61              |
| 6 Nucleus                | 13C                 |

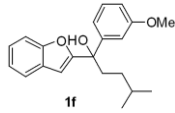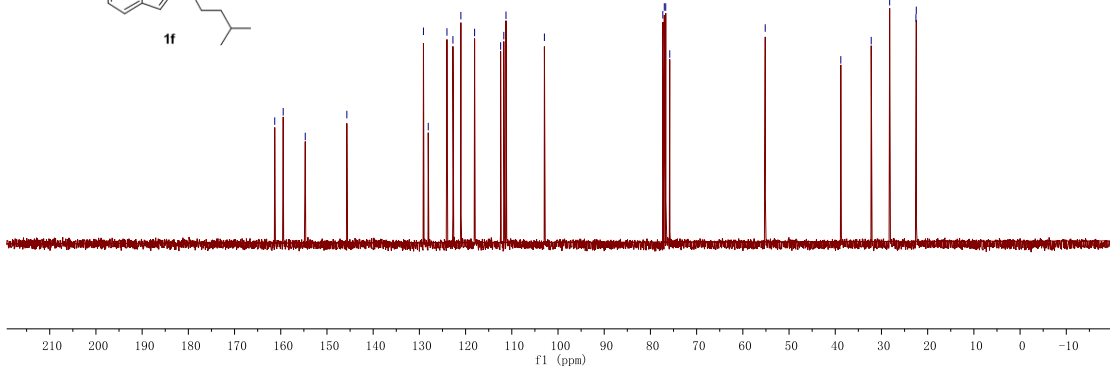

7.481  
 7.463  
 7.369  
 7.356  
 7.335  
 7.260  
 7.197  
 7.181  
 7.163  
 7.145  
 7.126  
 6.820  
 6.798  
 6.563  
 3.708  
 2.683  
 2.293  
 2.283  
 2.263  
 2.252  
 2.198  
 2.186  
 2.167  
 2.156  
 1.516  
 1.500  
 1.483  
 1.244  
 1.231  
 1.215  
 1.185  
 1.177  
 1.160  
 1.144  
 0.849  
 0.835

| Parameter                | Value               |
|--------------------------|---------------------|
| 1 Origin                 | Bruker BioSpin GmbH |
| 2 Solvent                | CDCl3               |
| 3 Temperature            | 298.1               |
| 4 Number of Scans        | 2                   |
| 5 Spectrometer Frequency | 400.13              |
| 6 Nucleus                | 1H                  |

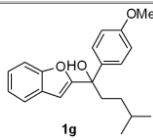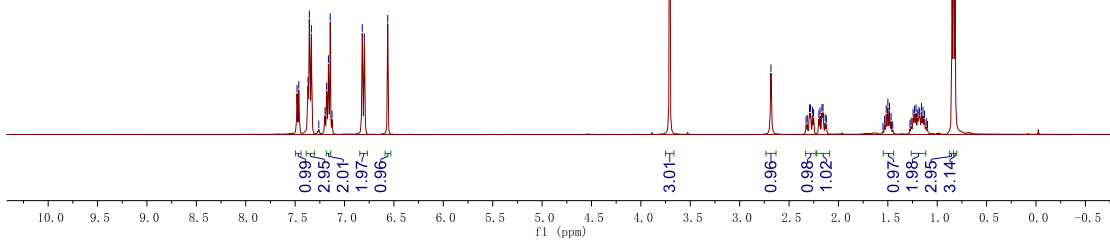

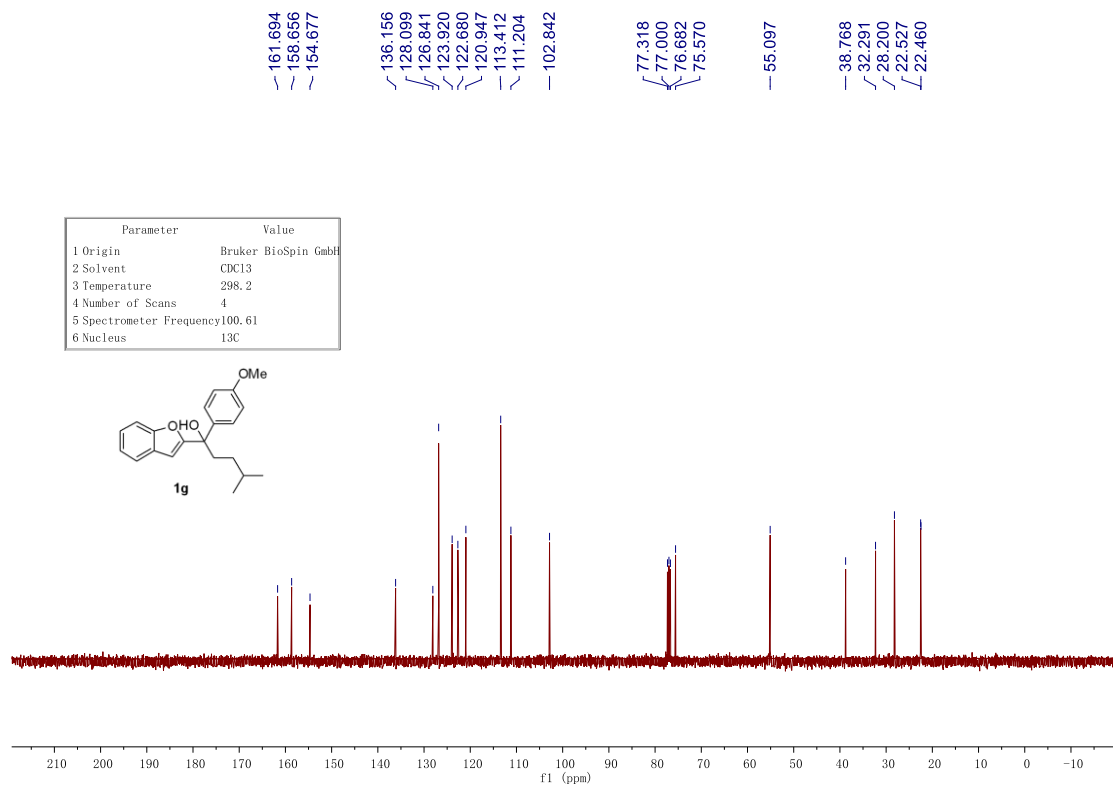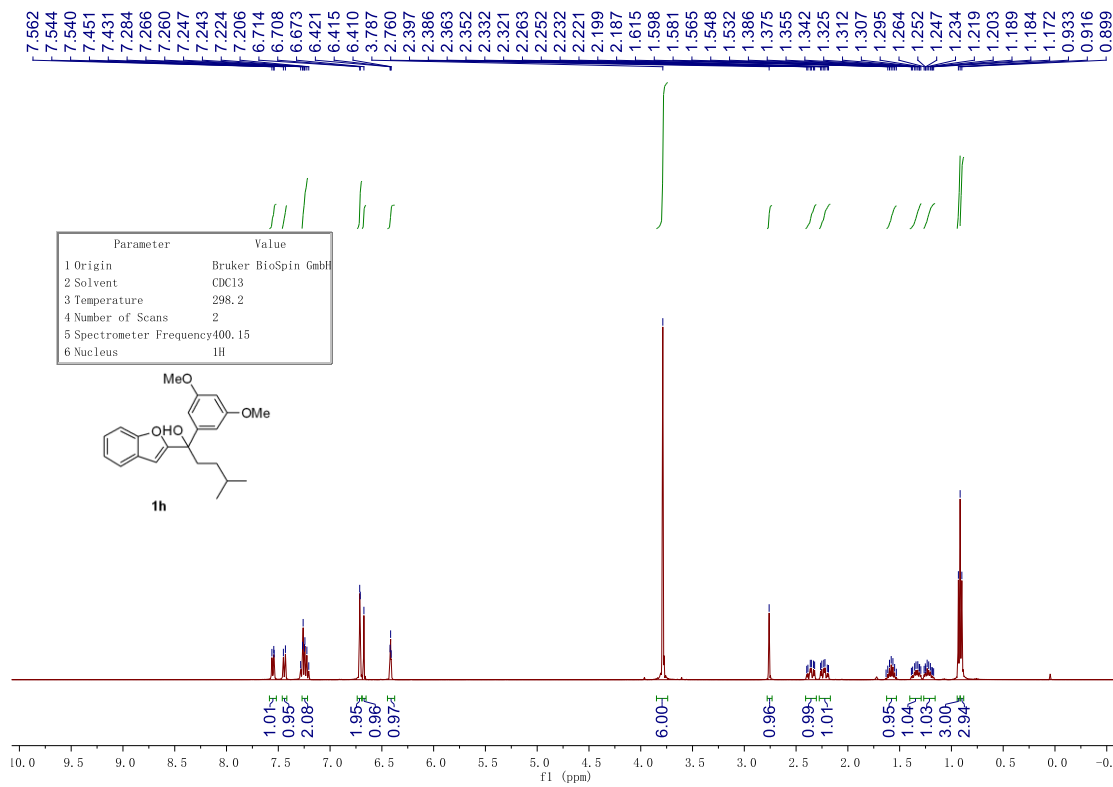

161.168  
160.564  
154.678  
146.570  
128.061  
124.031  
122.721  
121.014  
111.237  
104.085  
102.906  
98.934  
77.317  
77.000  
76.682  
75.865  
55.242  
38.754  
32.179  
28.209  
22.527  
22.459

| Parameter                | Value               |
|--------------------------|---------------------|
| 1 Origin                 | Bruker BioSpin GmbH |
| 2 Solvent                | CDCl3               |
| 3 Temperature            | 298.2               |
| 4 Number of Scans        | 10                  |
| 5 Spectrometer Frequency | 100.62              |
| 6 Nucleus                | 13C                 |

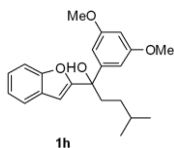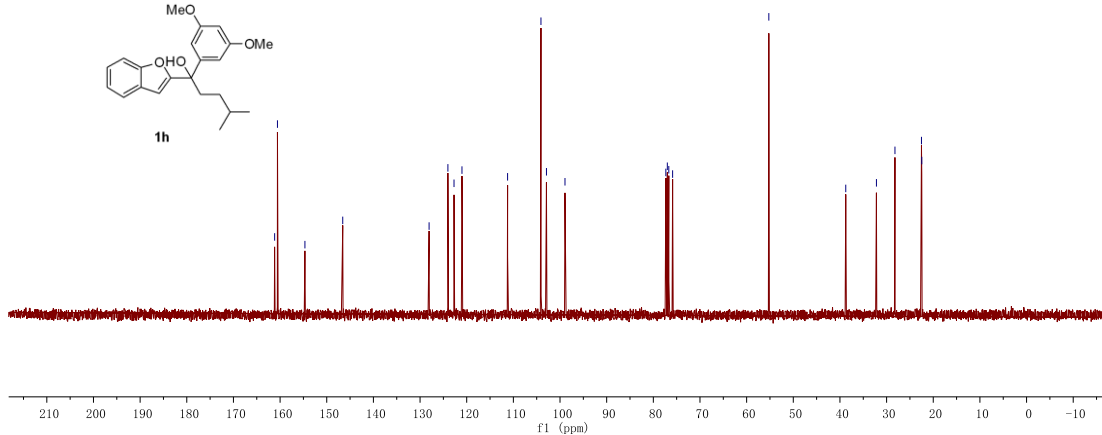

7.562  
7.544  
7.452  
7.428  
7.405  
7.377  
7.356  
7.276  
7.260  
7.237  
7.219  
7.201  
6.663  
2.578  
2.409  
2.391  
2.385  
2.374  
2.367  
2.361  
2.347  
2.333  
2.269  
2.254  
2.241  
2.234  
2.227  
2.216  
2.210  
2.192  
1.594  
1.578  
1.562  
1.328  
1.294  
1.285  
1.276  
1.268  
1.259  
1.250  
0.917  
0.907  
0.900  
0.884

| Parameter                | Value               |
|--------------------------|---------------------|
| 1 Origin                 | Bruker BioSpin GmbH |
| 2 Solvent                | CDCl3               |
| 3 Temperature            | 298.1               |
| 4 Number of Scans        | 2                   |
| 5 Spectrometer Frequency | 400.13              |
| 6 Nucleus                | 1H                  |

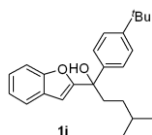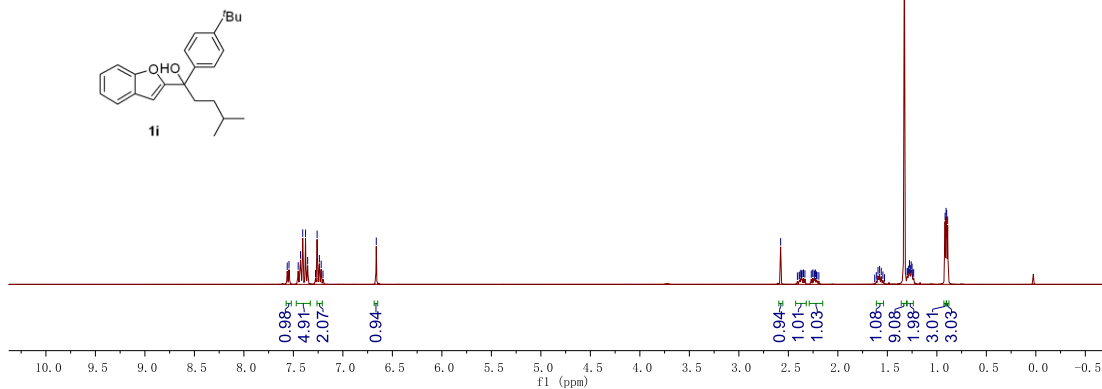

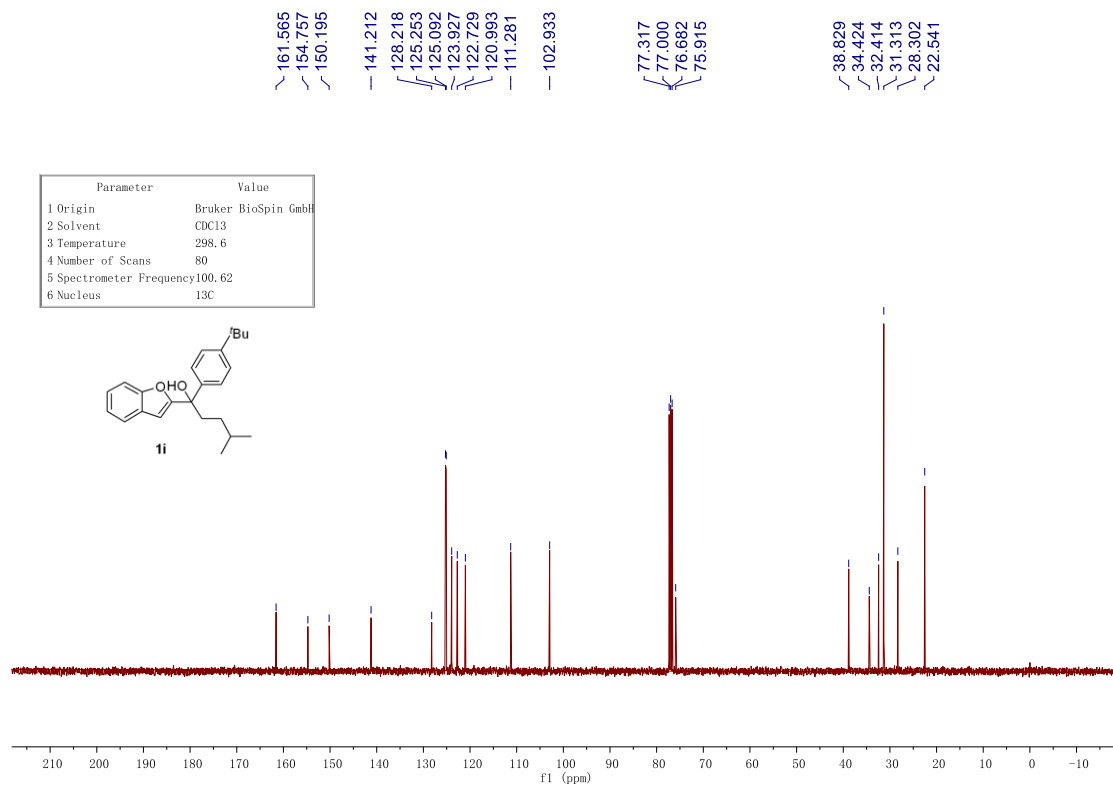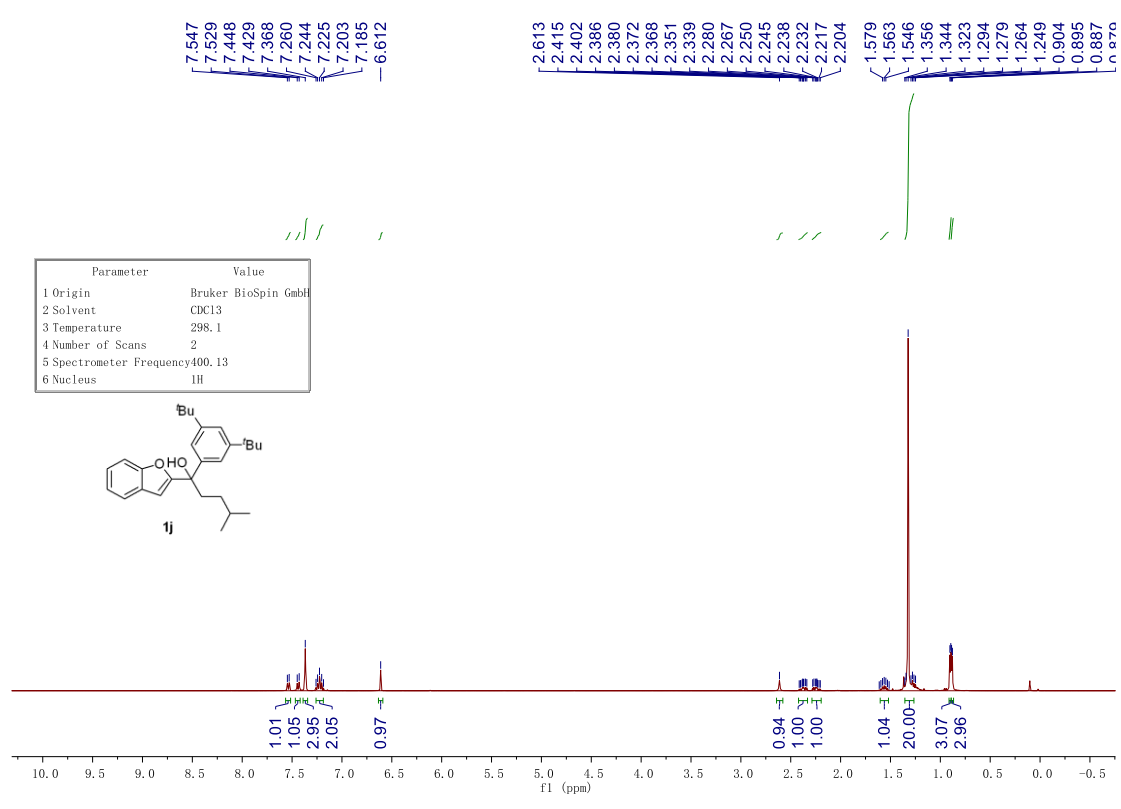

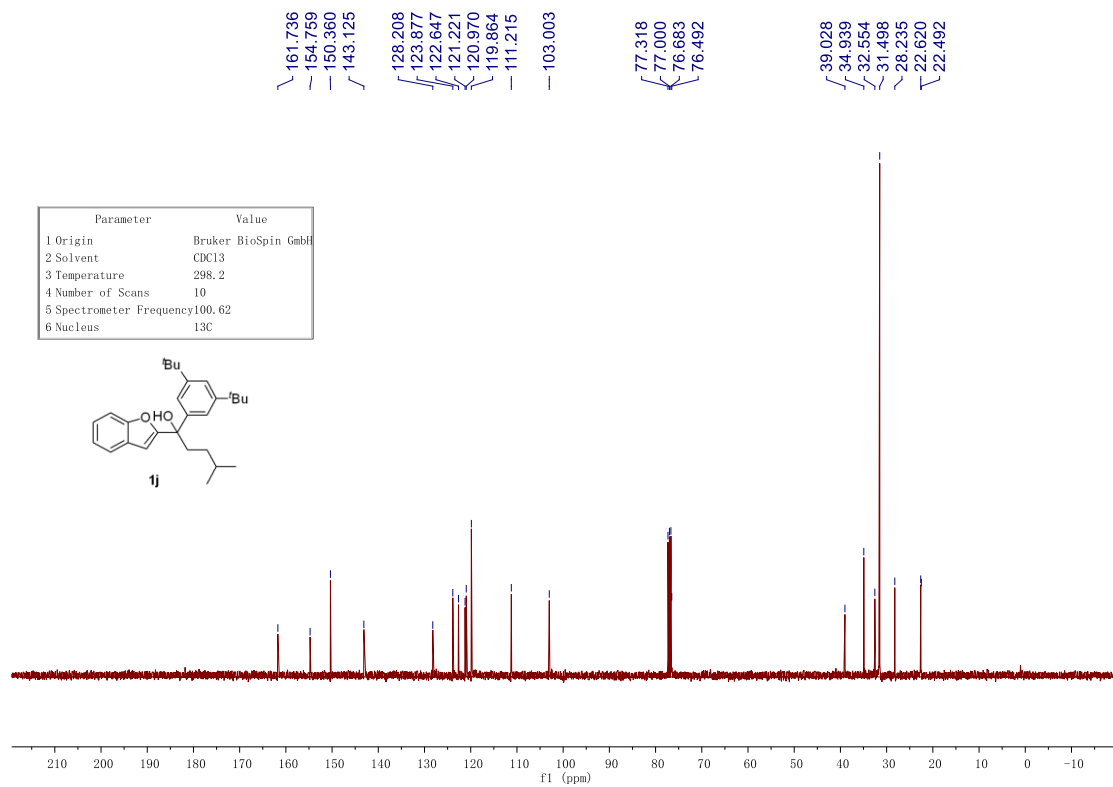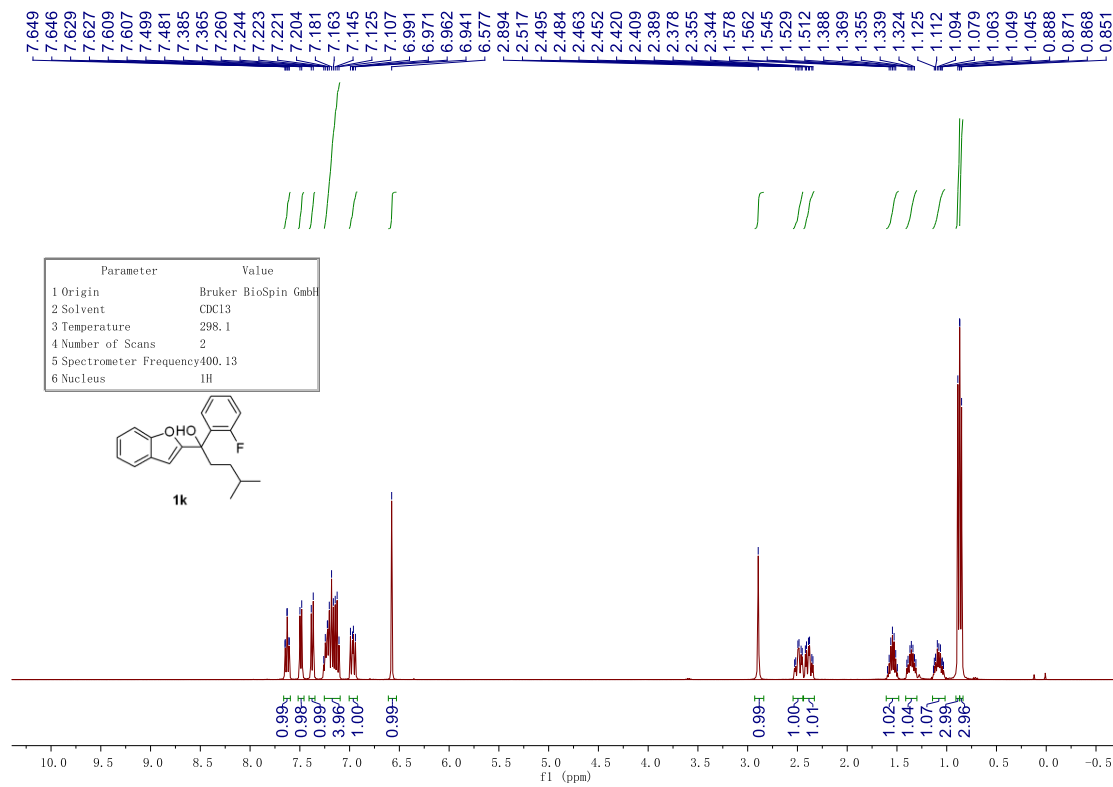

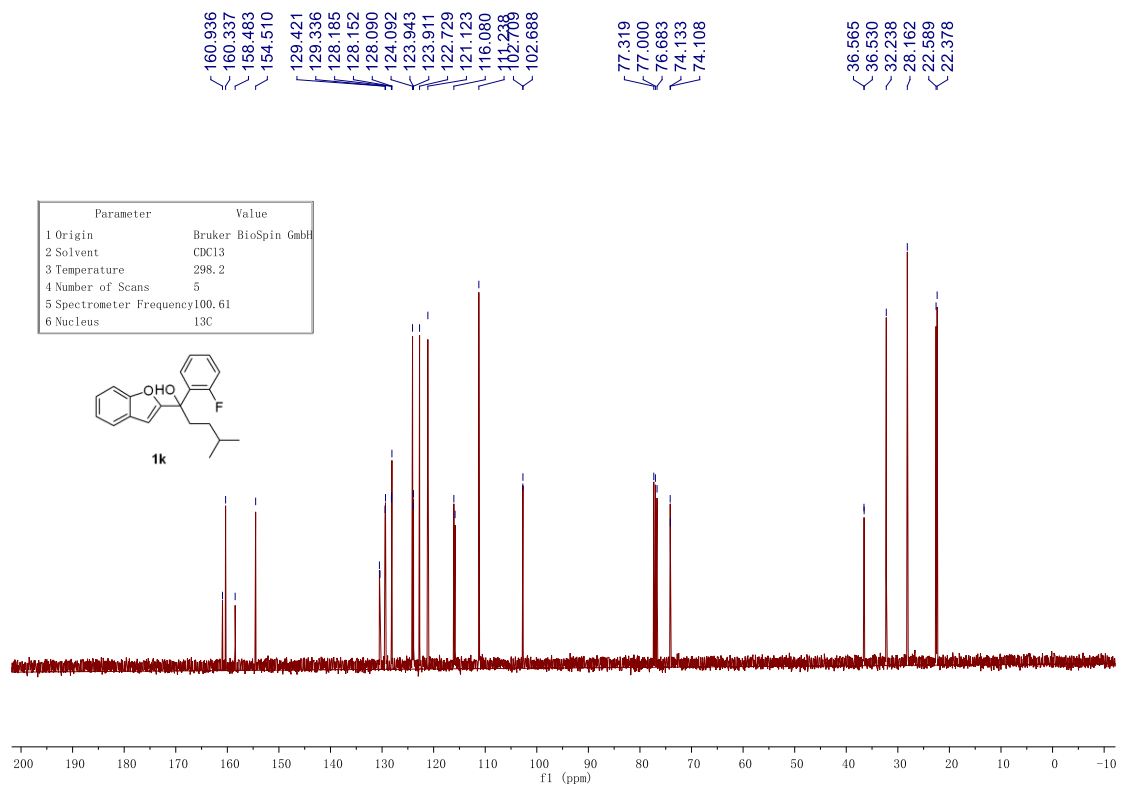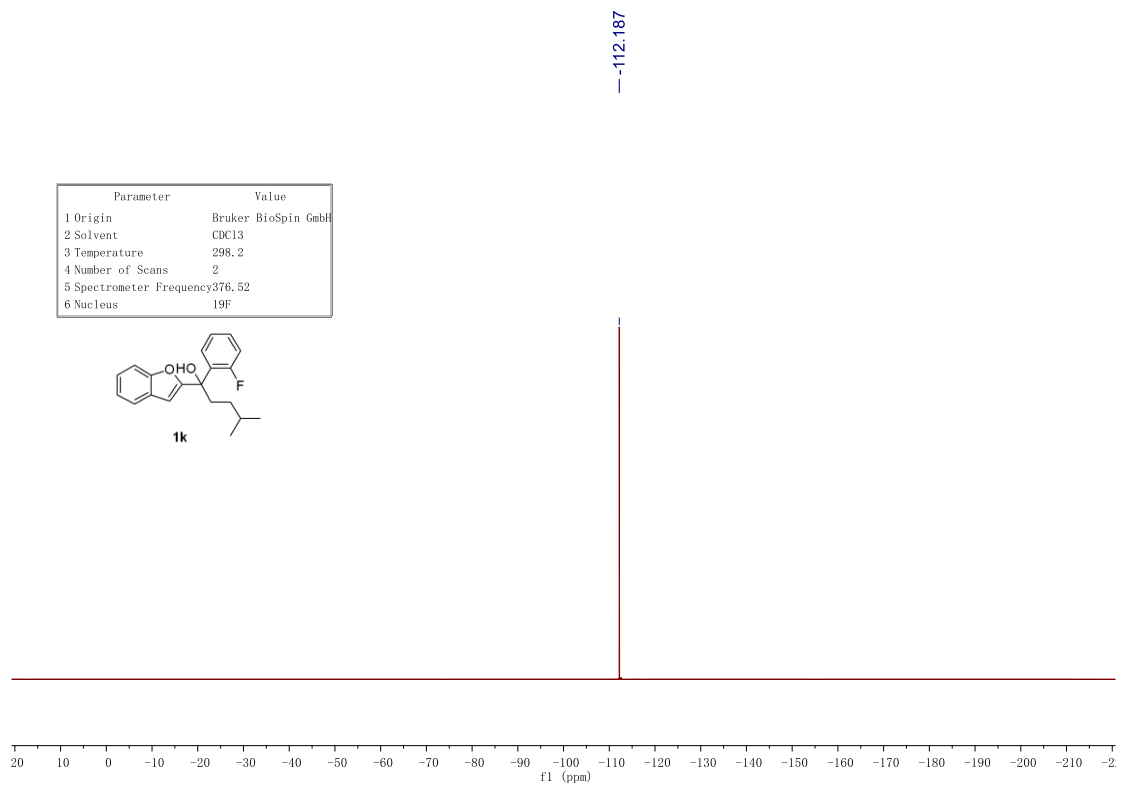



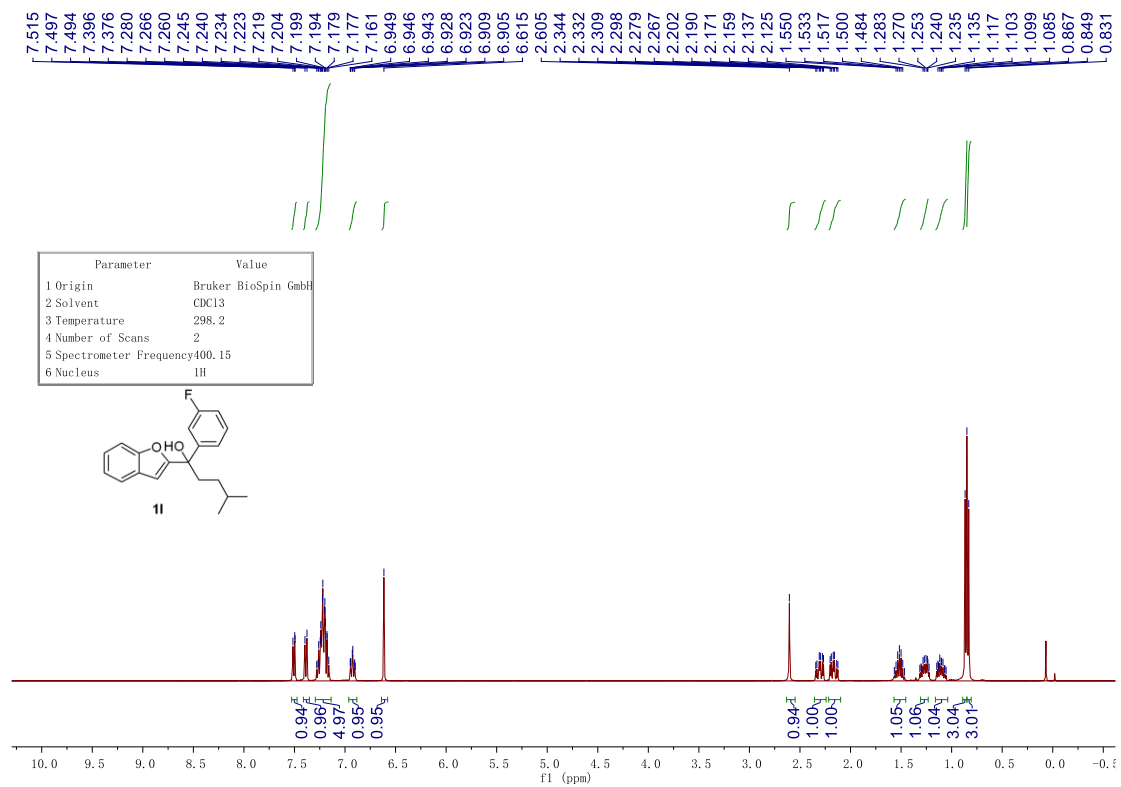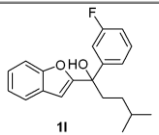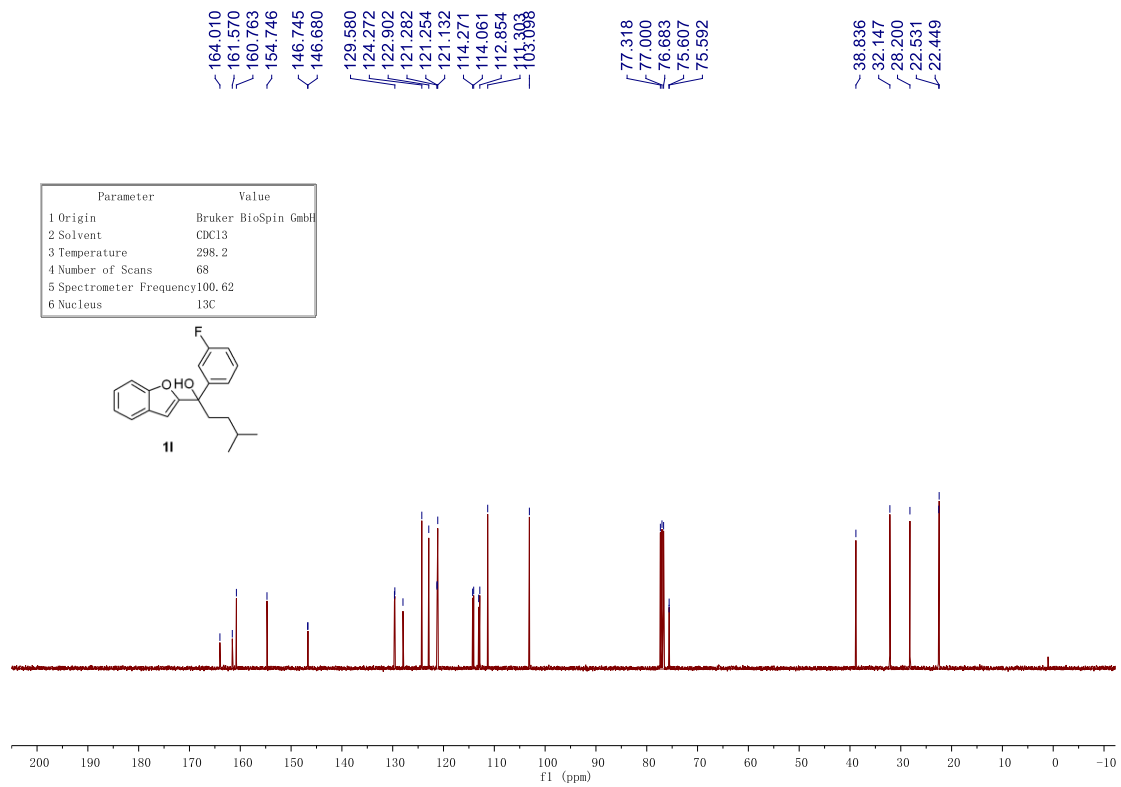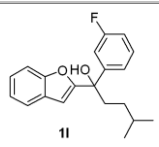

--112.843

| Parameter                | Value               |
|--------------------------|---------------------|
| 1 Origin                 | Bruker BioSpin GmbH |
| 2 Solvent                | CDC13               |
| 3 Temperature            | 298.2               |
| 4 Number of Scans        | 2                   |
| 5 Spectrometer Frequency | 376.52              |
| 6 Nucleus                | 19F                 |

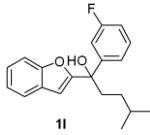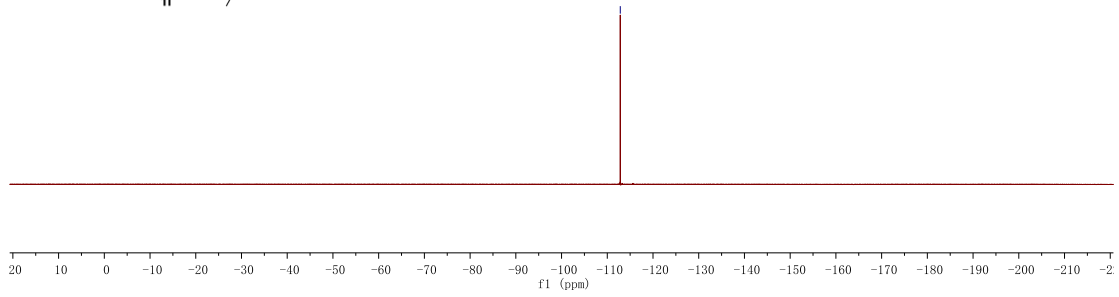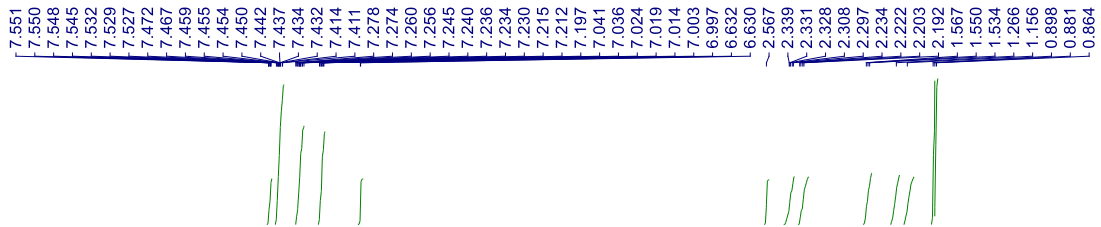

| Parameter                | Value               |
|--------------------------|---------------------|
| 1 Origin                 | Bruker BioSpin GmbH |
| 2 Solvent                | CDC13               |
| 3 Temperature            | 298.2               |
| 4 Number of Scans        | 2                   |
| 5 Spectrometer Frequency | 400.15              |
| 6 Nucleus                | 1H                  |

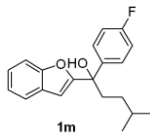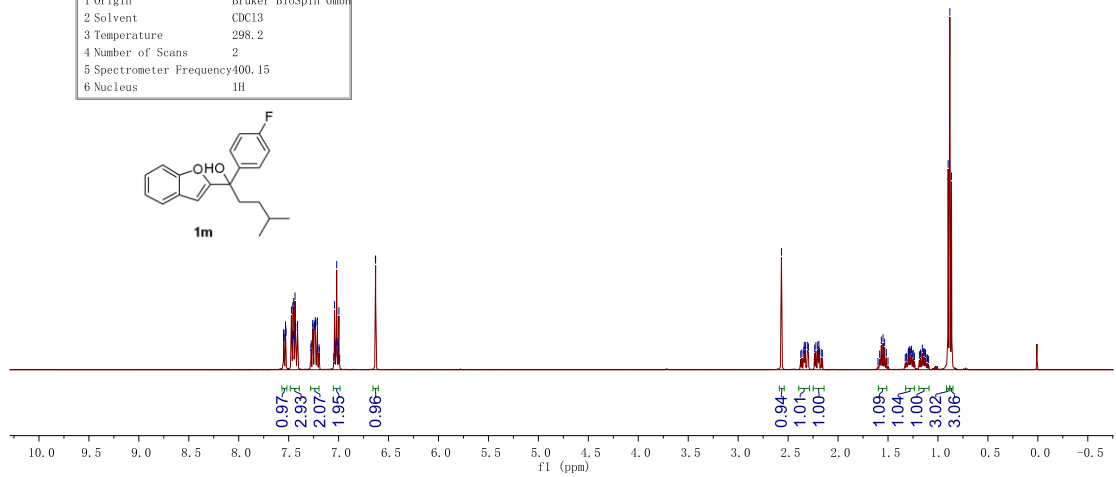

163.213  
 161.144  
 160.769  
 154.729  
 139.702  
 139.672  
 127.465  
 127.384  
 124.207  
 122.871  
 121.093  
 115.023  
 114.811  
 111.279  
 103.039  
 77.317  
 77.000  
 76.682  
 75.576  
 38.933  
 32.228  
 28.203  
 22.539  
 22.457

| Parameter                | Value               |
|--------------------------|---------------------|
| 1 Origin                 | Bruker BioSpin GmbH |
| 2 Solvent                | CDCl3               |
| 3 Temperature            | 298.2               |
| 4 Number of Scans        | 180                 |
| 5 Spectrometer Frequency | 100.61              |
| 6 Nucleus                | 13C                 |

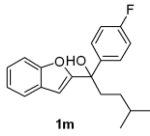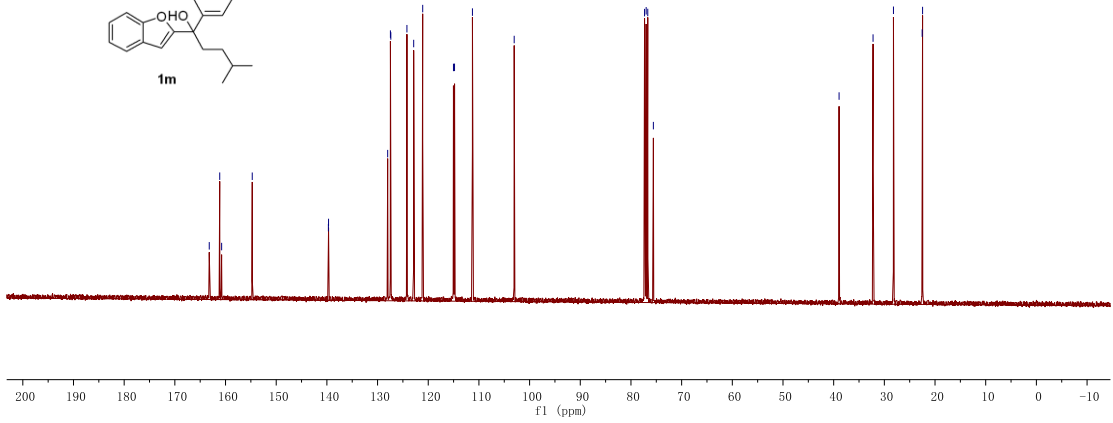

---115.581

| Parameter                | Value               |
|--------------------------|---------------------|
| 1 Origin                 | Bruker BioSpin GmbH |
| 2 Solvent                | CDCl3               |
| 3 Temperature            | 298.2               |
| 4 Number of Scans        | 2                   |
| 5 Spectrometer Frequency | 376.52              |
| 6 Nucleus                | 19F                 |

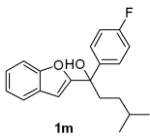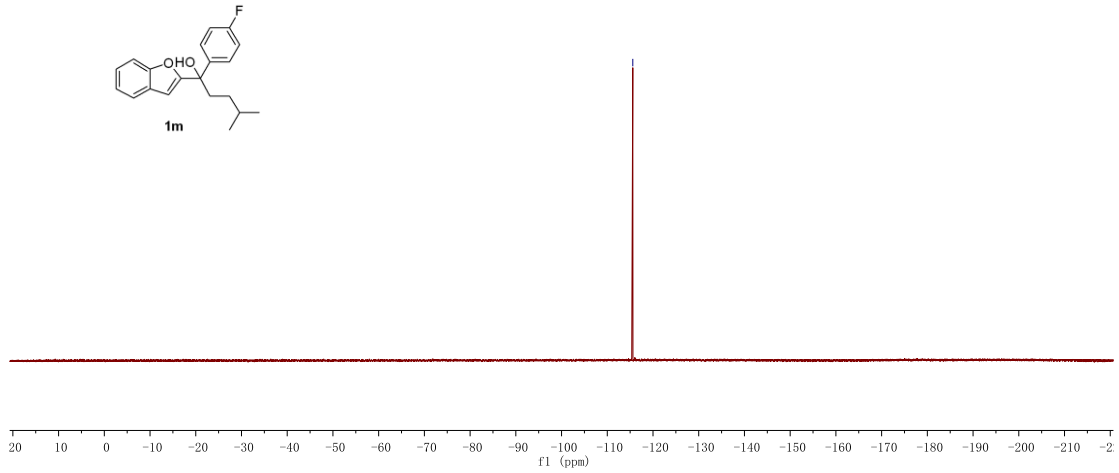

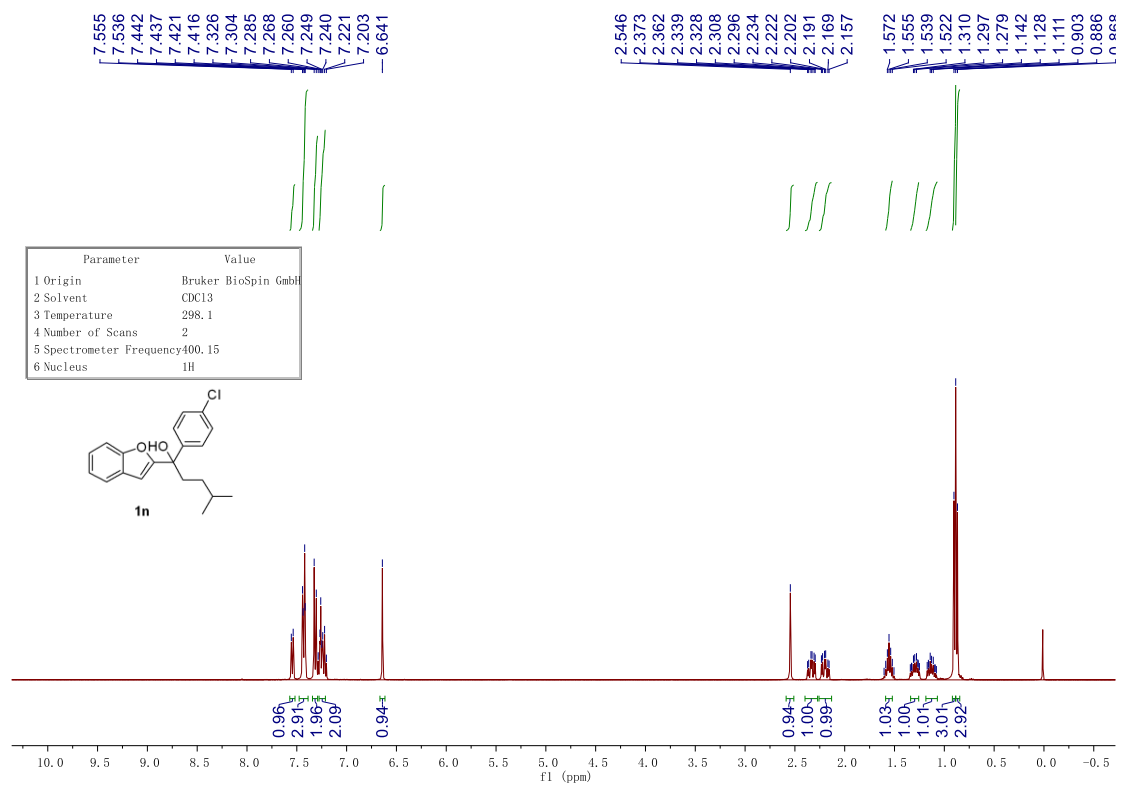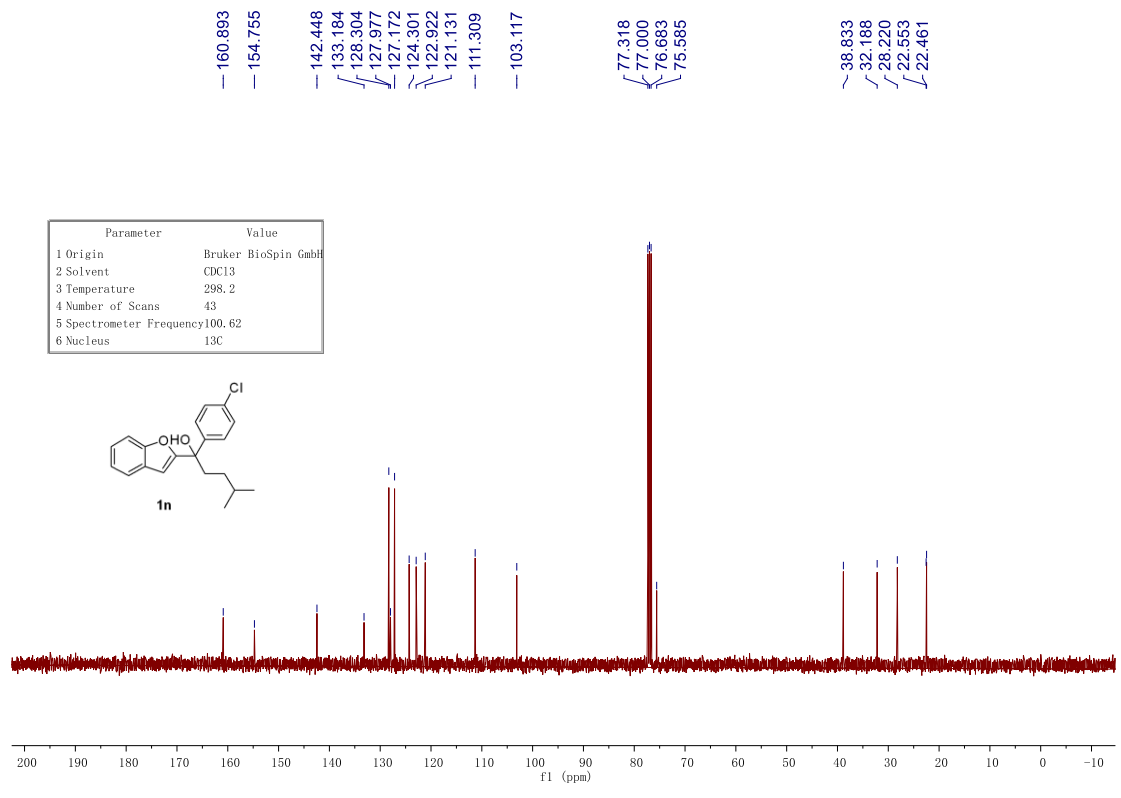

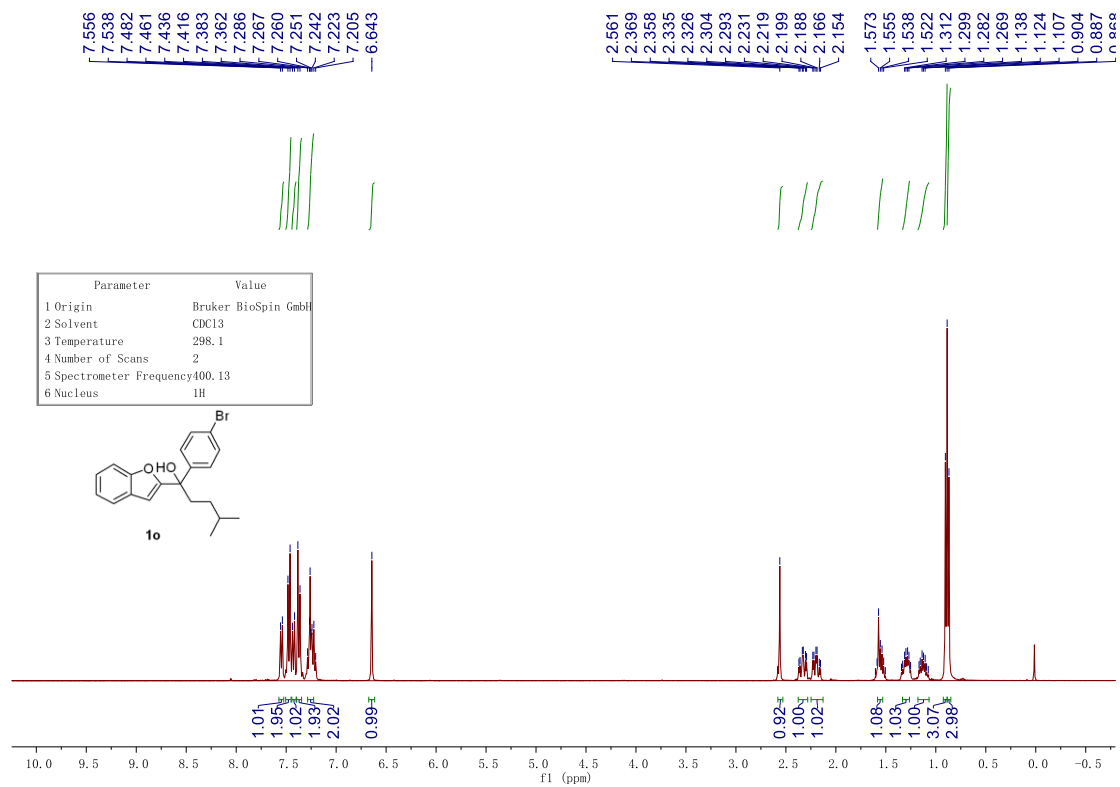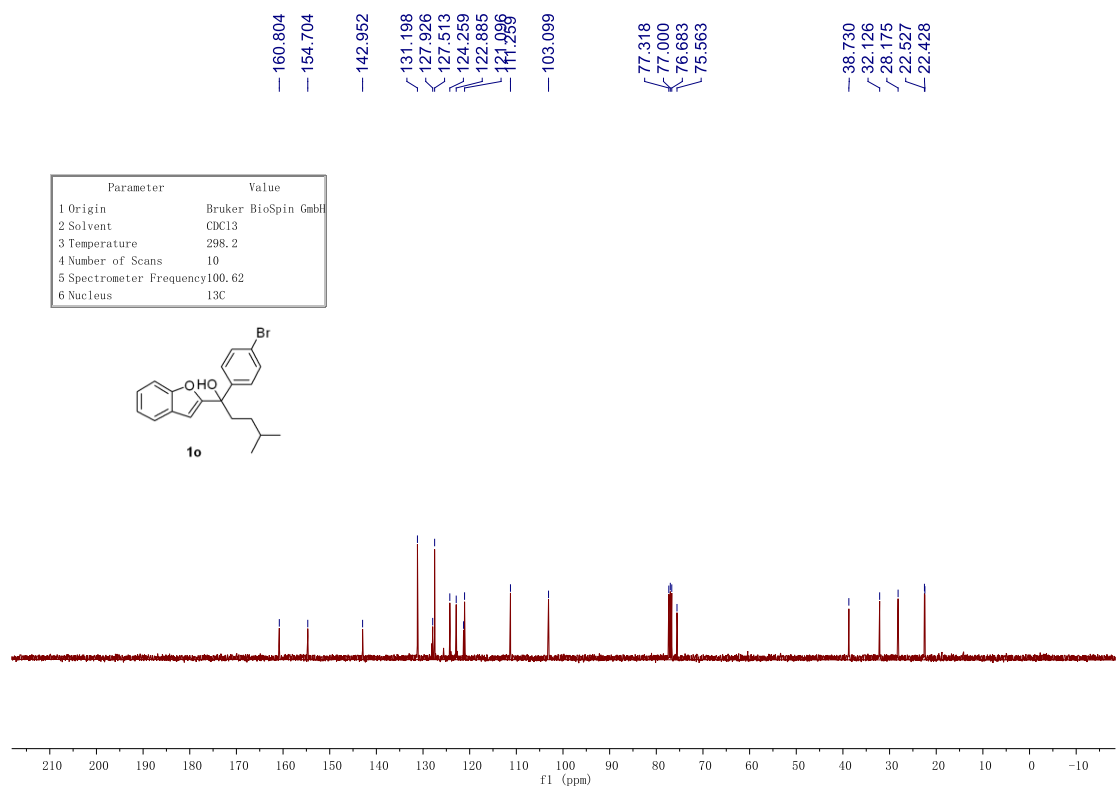

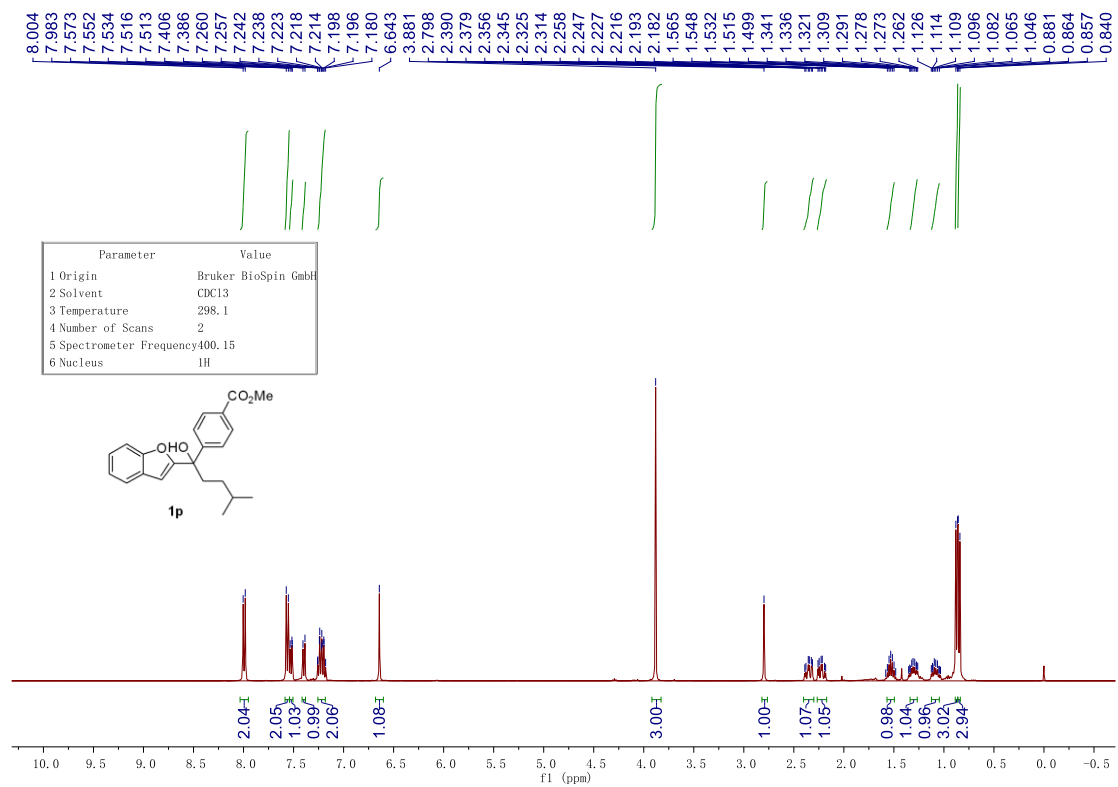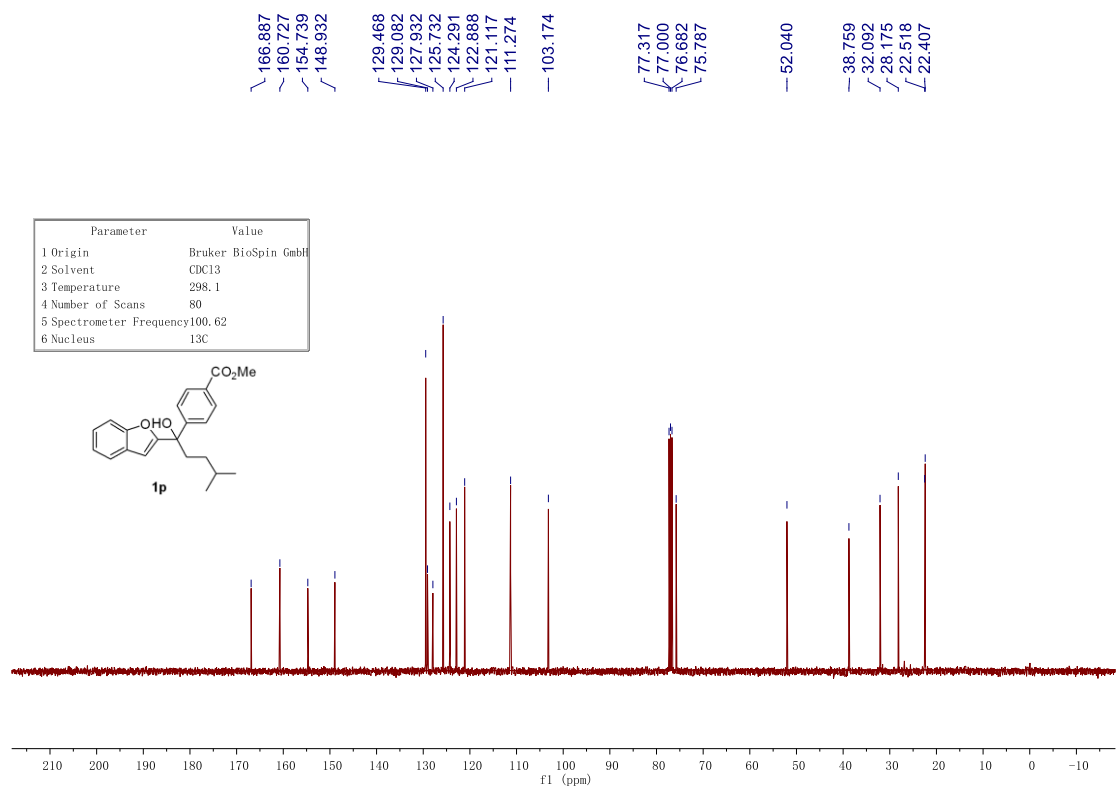

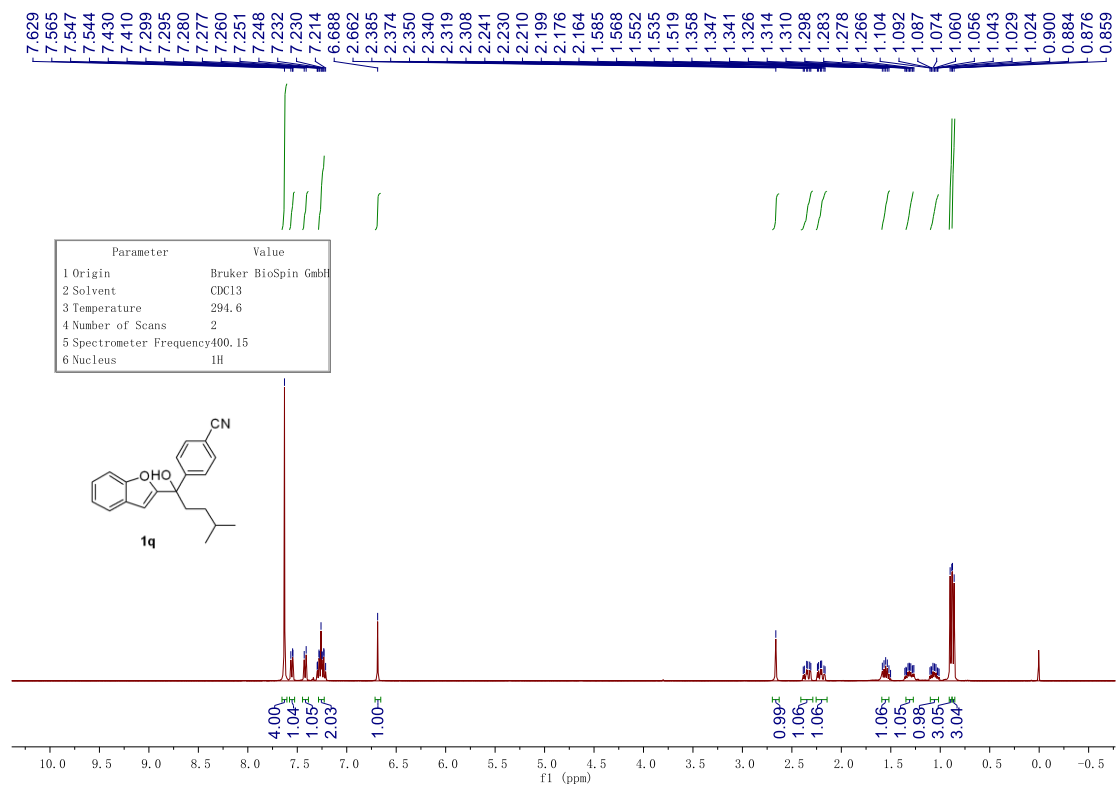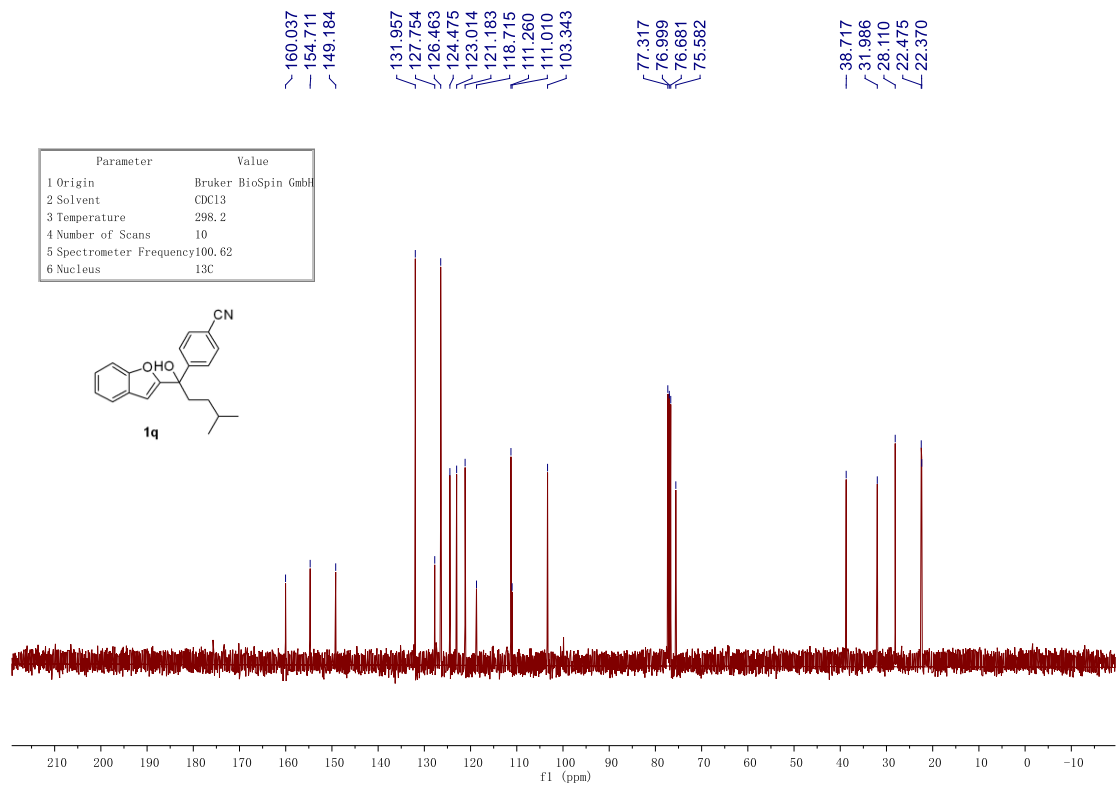

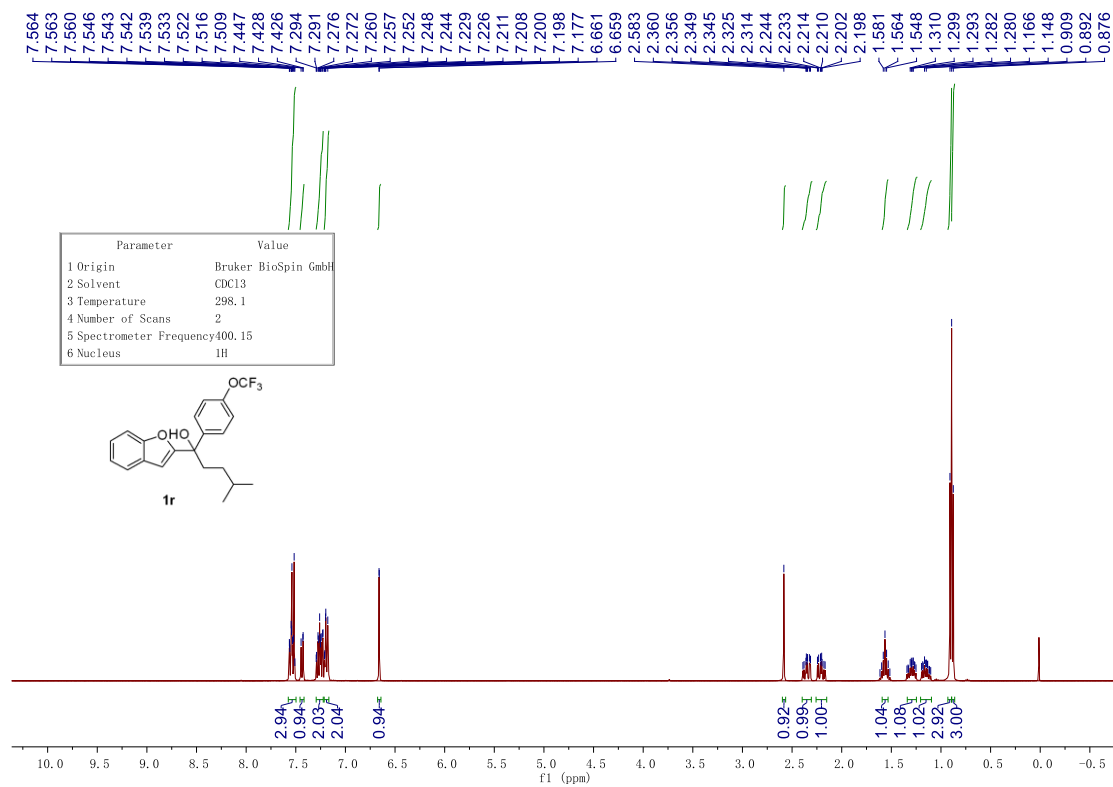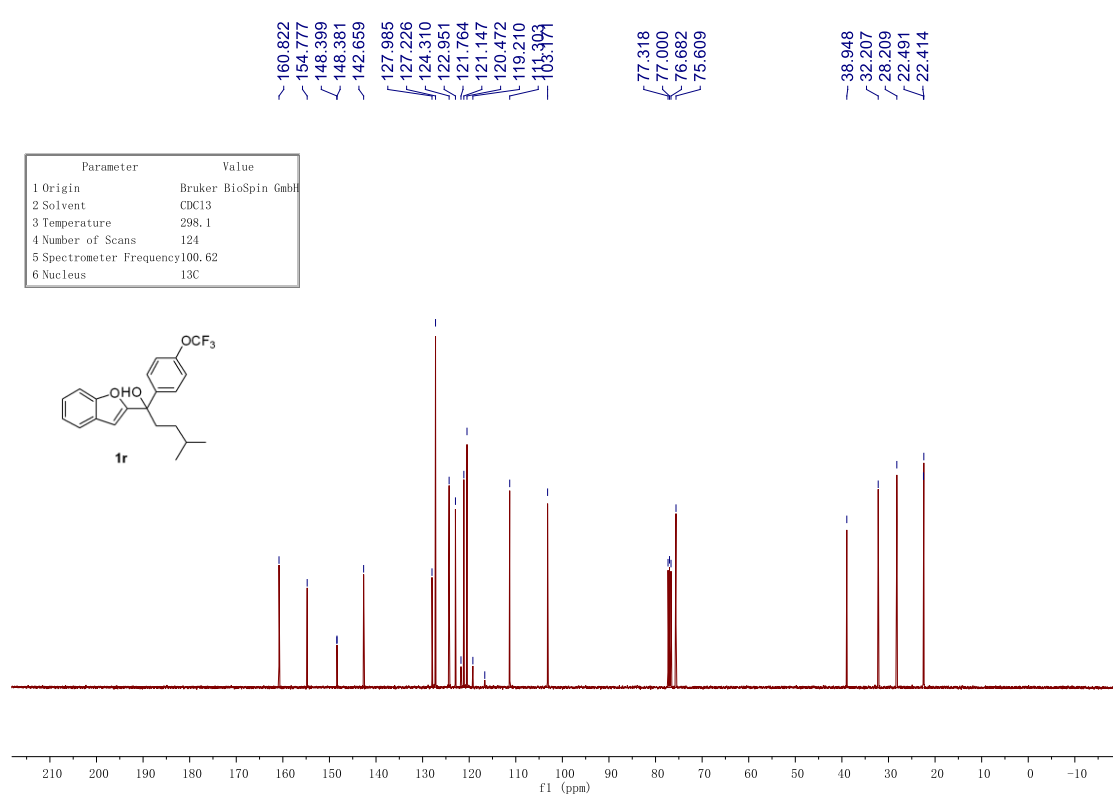



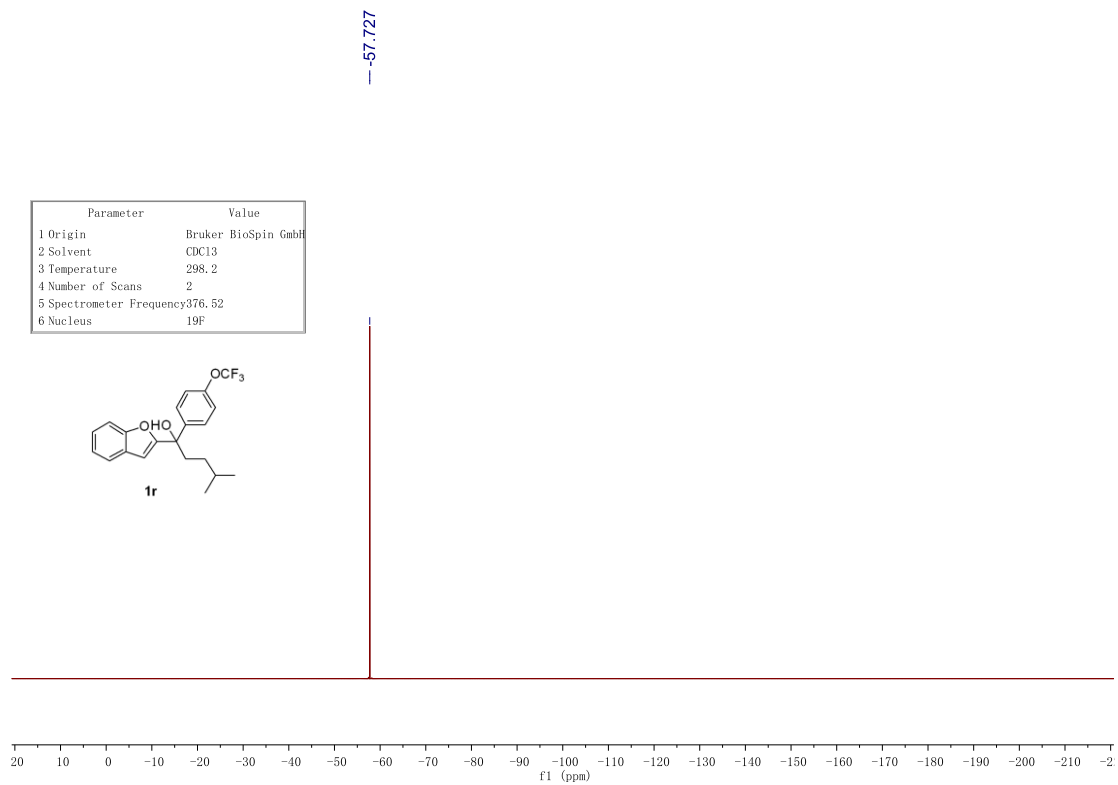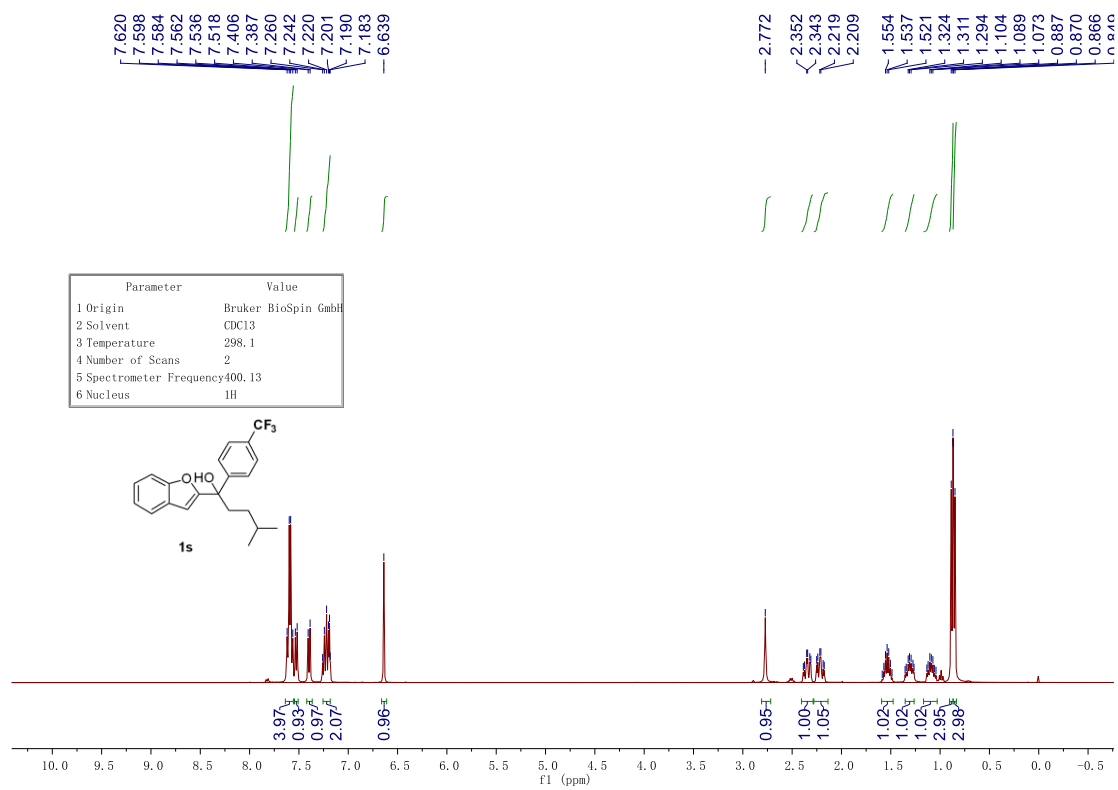

160.549  
 154.774  
 147.850  
 127.908  
 126.097  
 125.175  
 125.138  
 125.100  
 125.064  
 124.415  
 122.998  
 121.306  
 103.284  
 77.318  
 77.000  
 76.683  
 75.711  
 38.843  
 32.091  
 28.197  
 22.498  
 22.386

| Parameter                | Value               |
|--------------------------|---------------------|
| 1 Origin                 | Bruker BioSpin GmbH |
| 2 Solvent                | CDCl3               |
| 3 Temperature            | 298.2               |
| 4 Number of Scans        | 80                  |
| 5 Spectrometer Frequency | 100.61              |
| 6 Nucleus                | 13C                 |

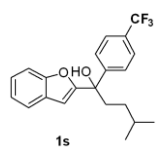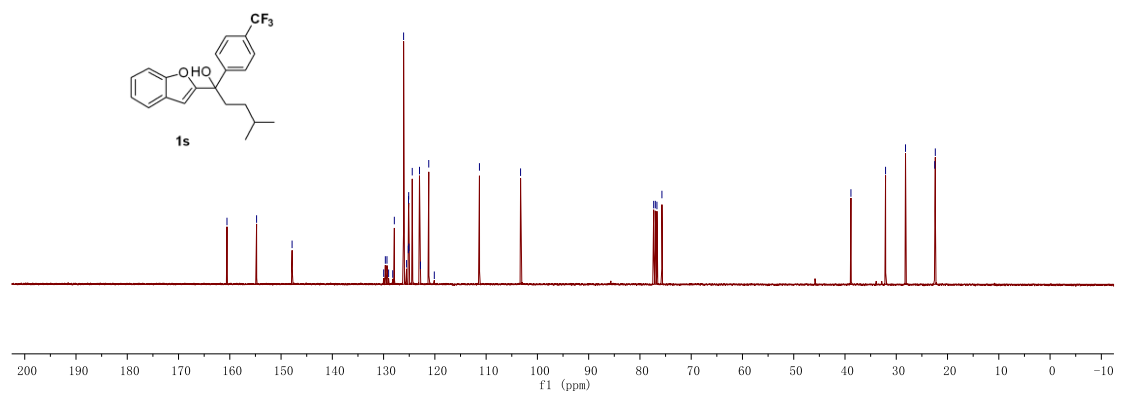

62.333

| Parameter                | Value               |
|--------------------------|---------------------|
| 1 Origin                 | Bruker BioSpin GmbH |
| 2 Solvent                | CDCl3               |
| 3 Temperature            | 296.2               |
| 4 Number of Scans        | 2                   |
| 5 Spectrometer Frequency | 376.52              |
| 6 Nucleus                | 19F                 |

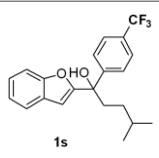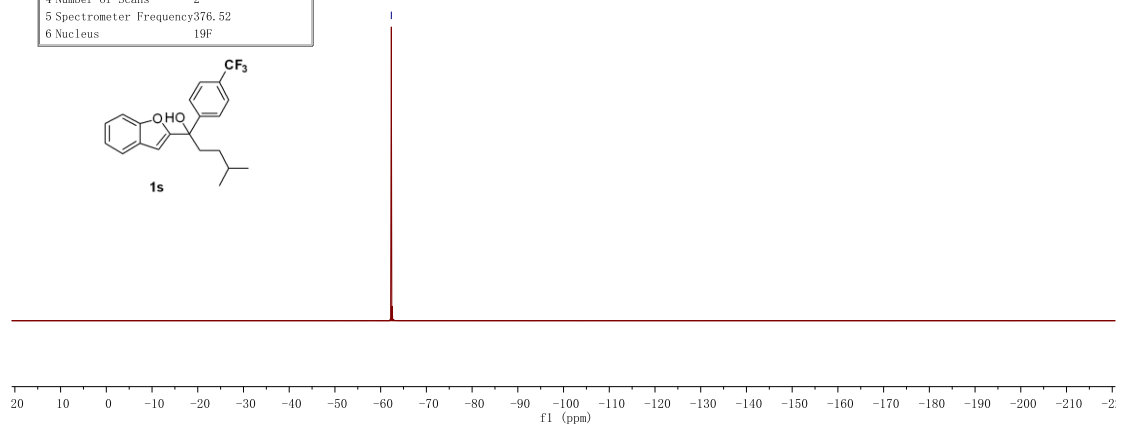

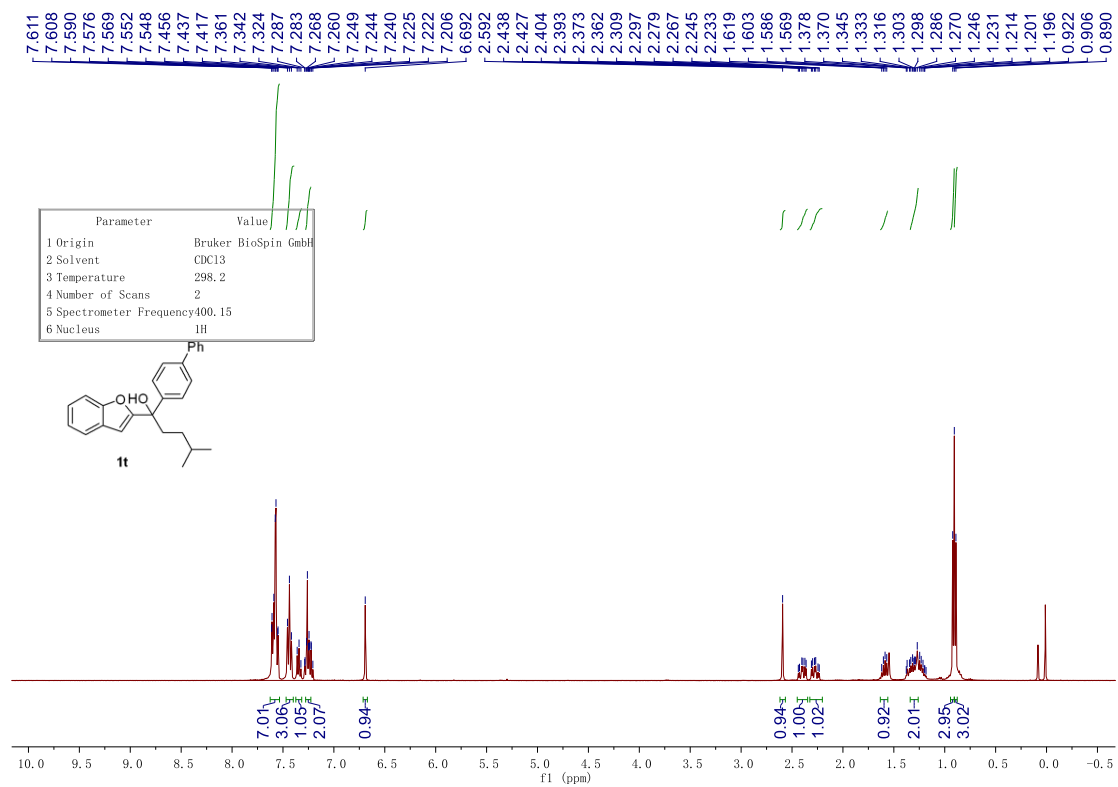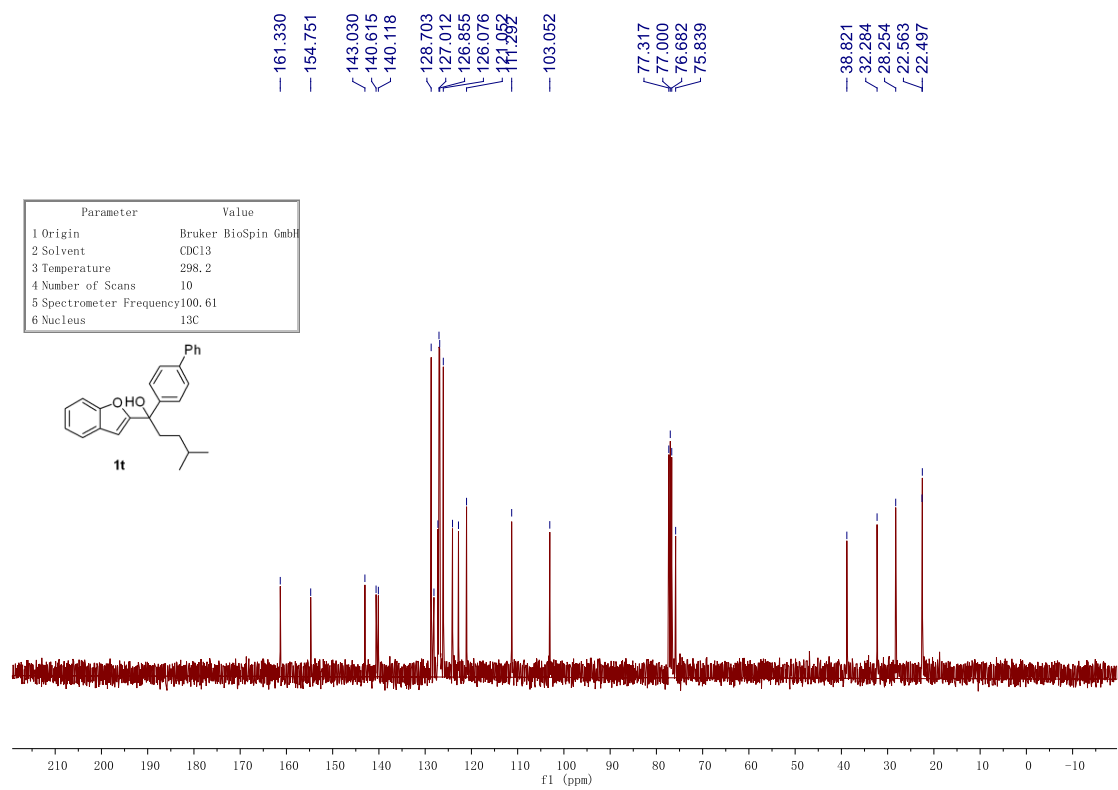

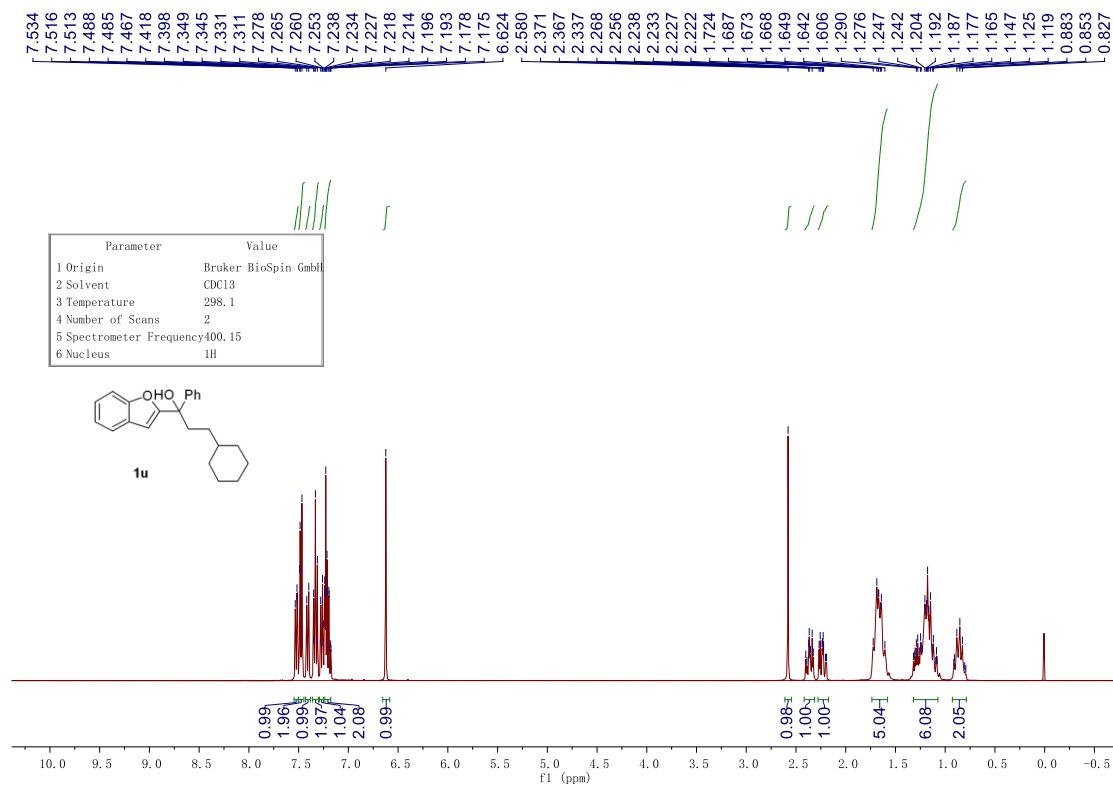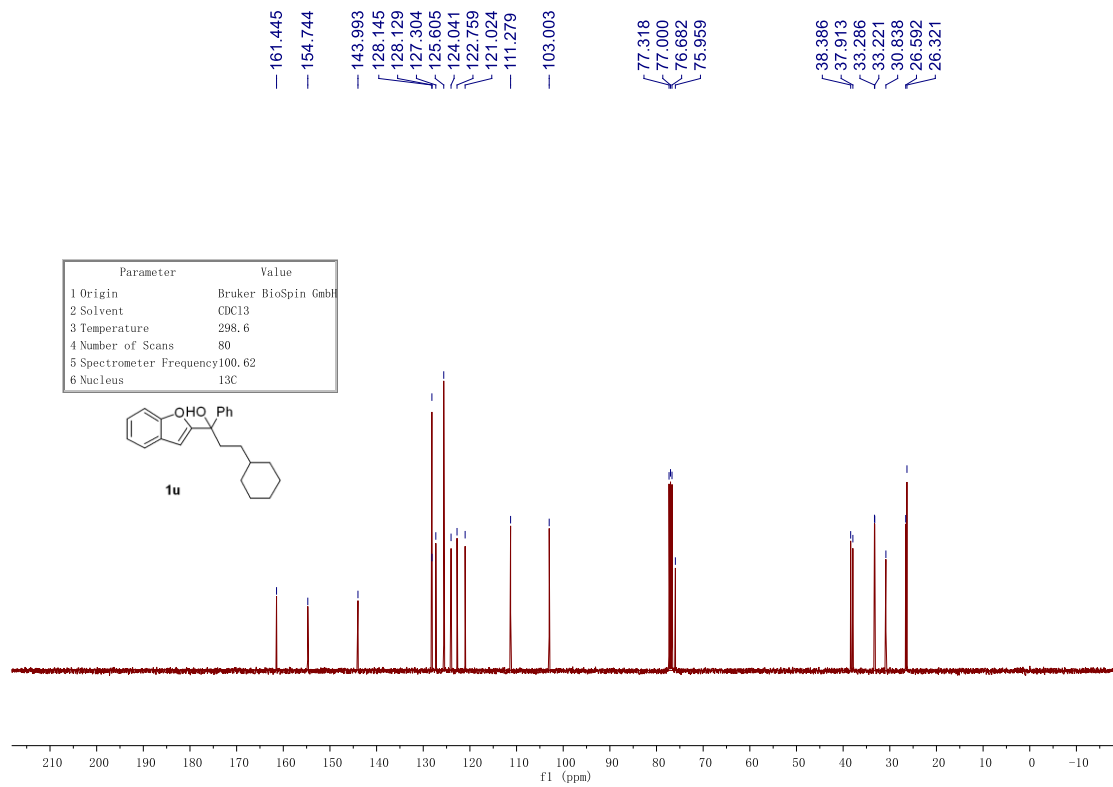

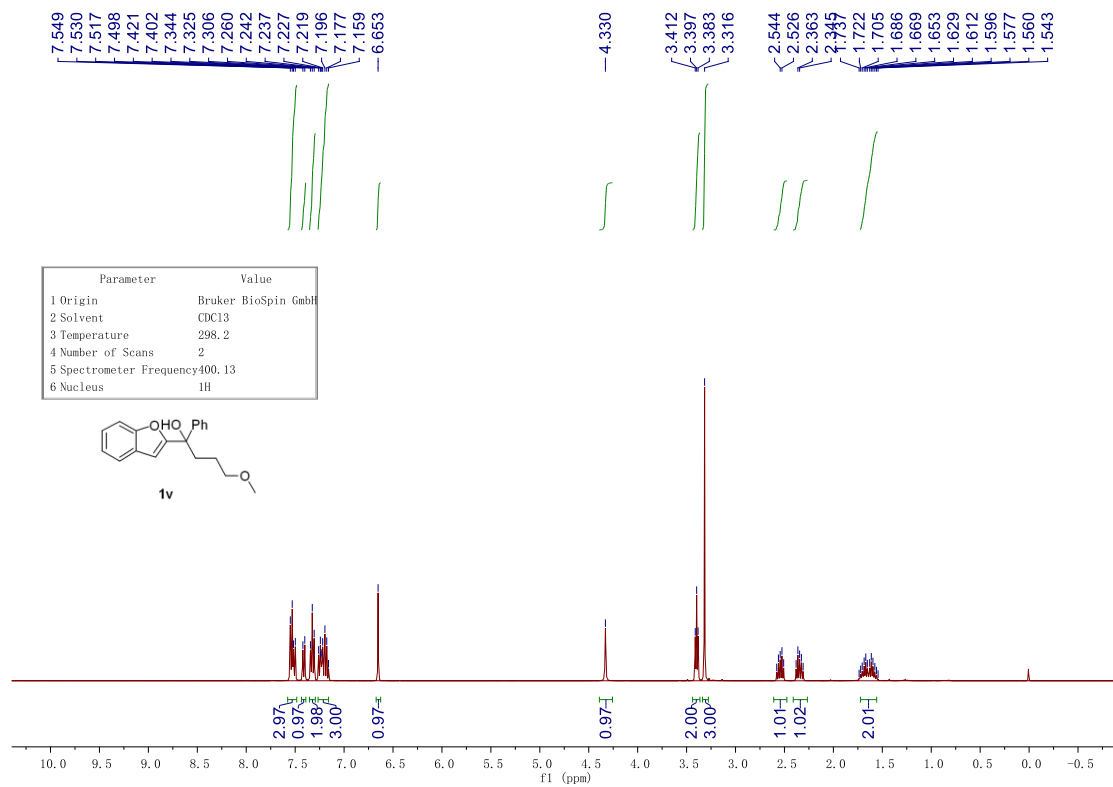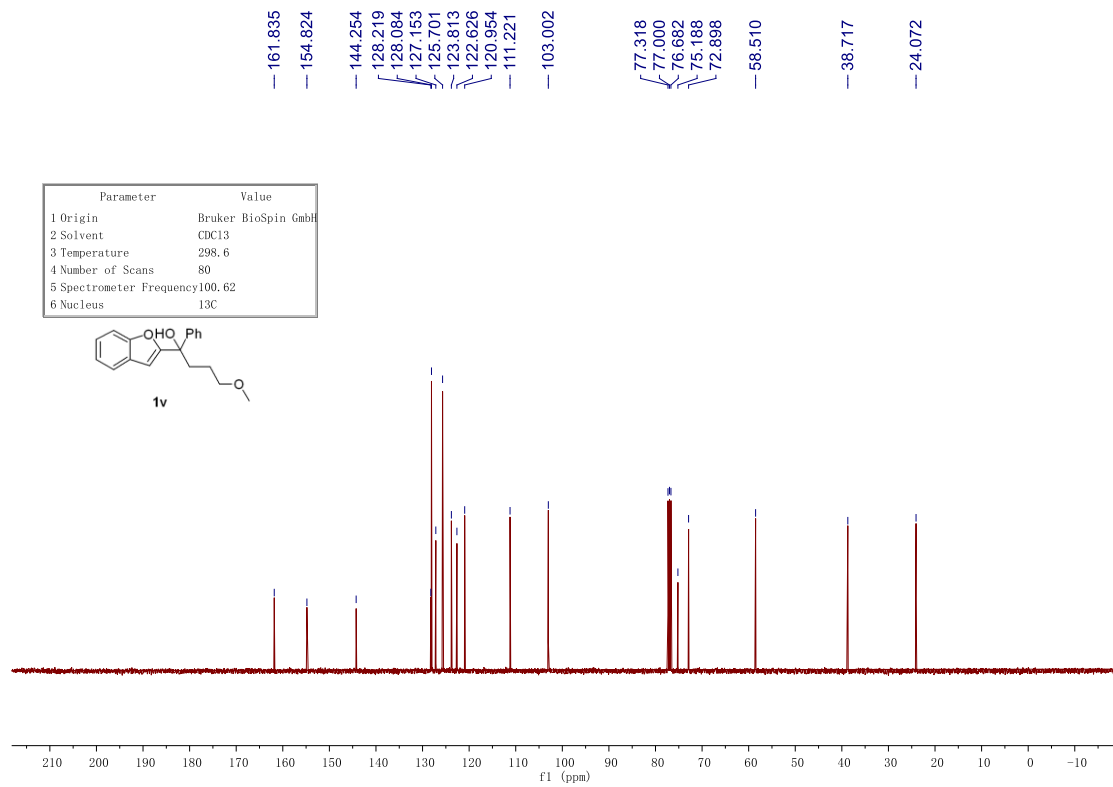

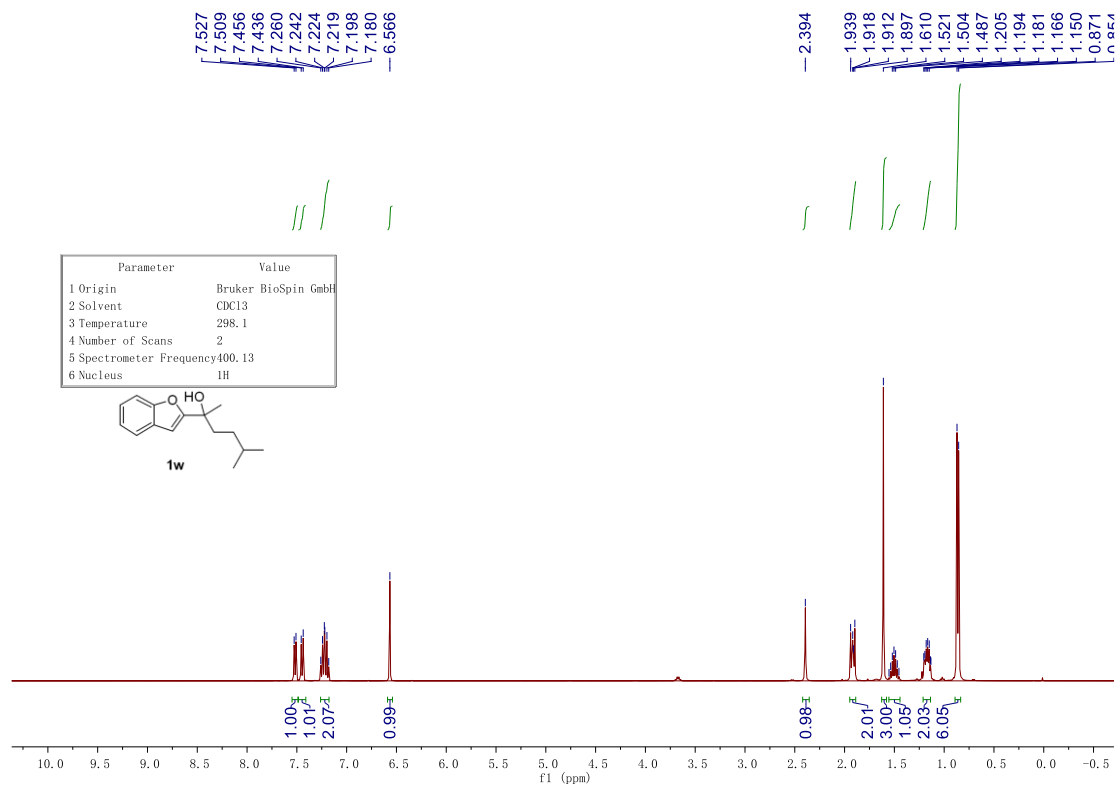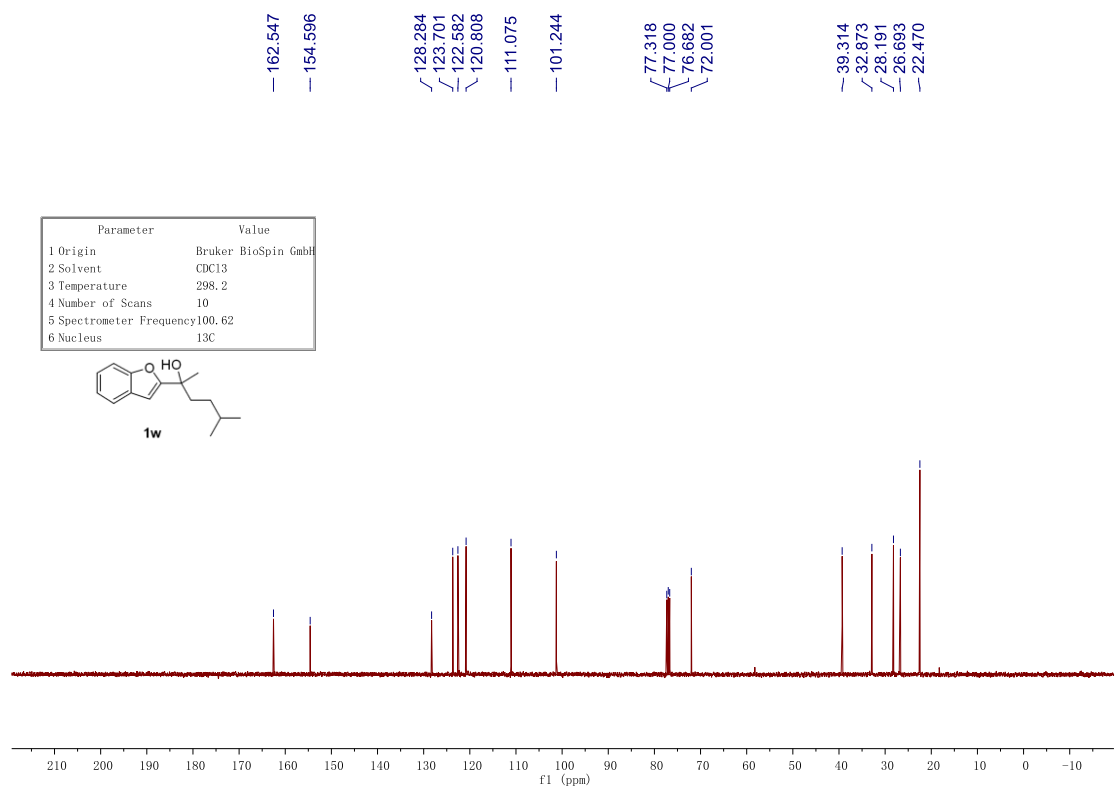

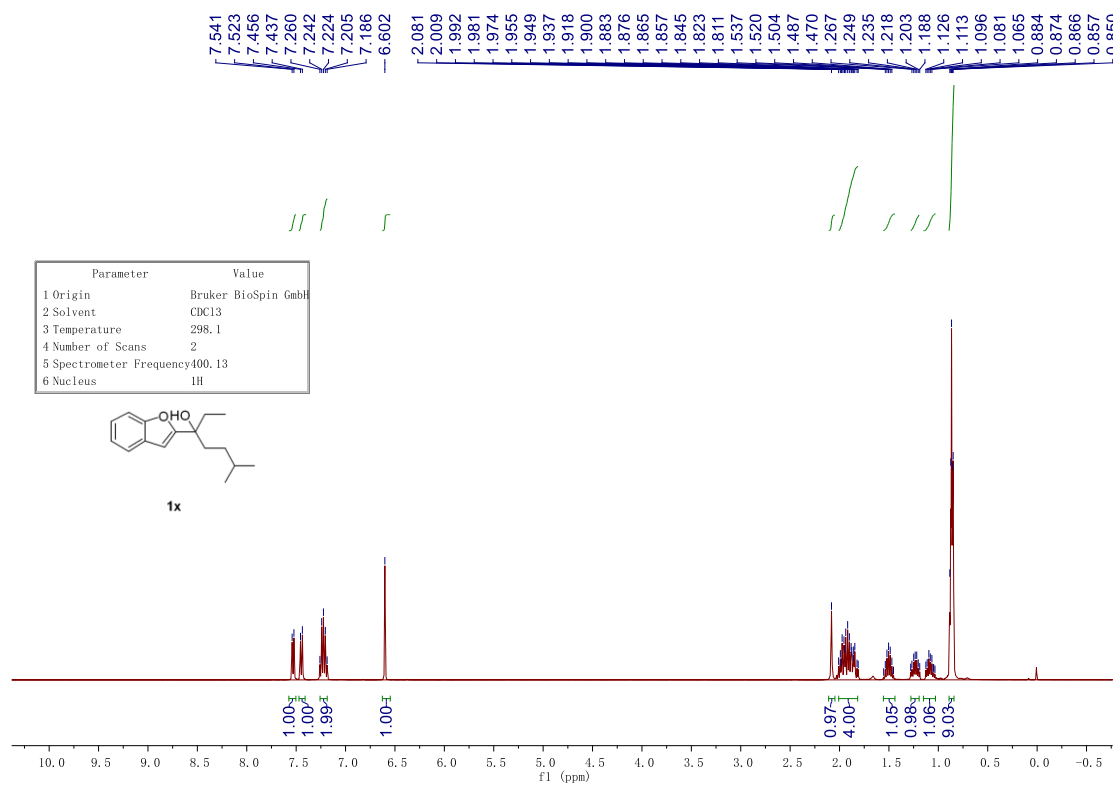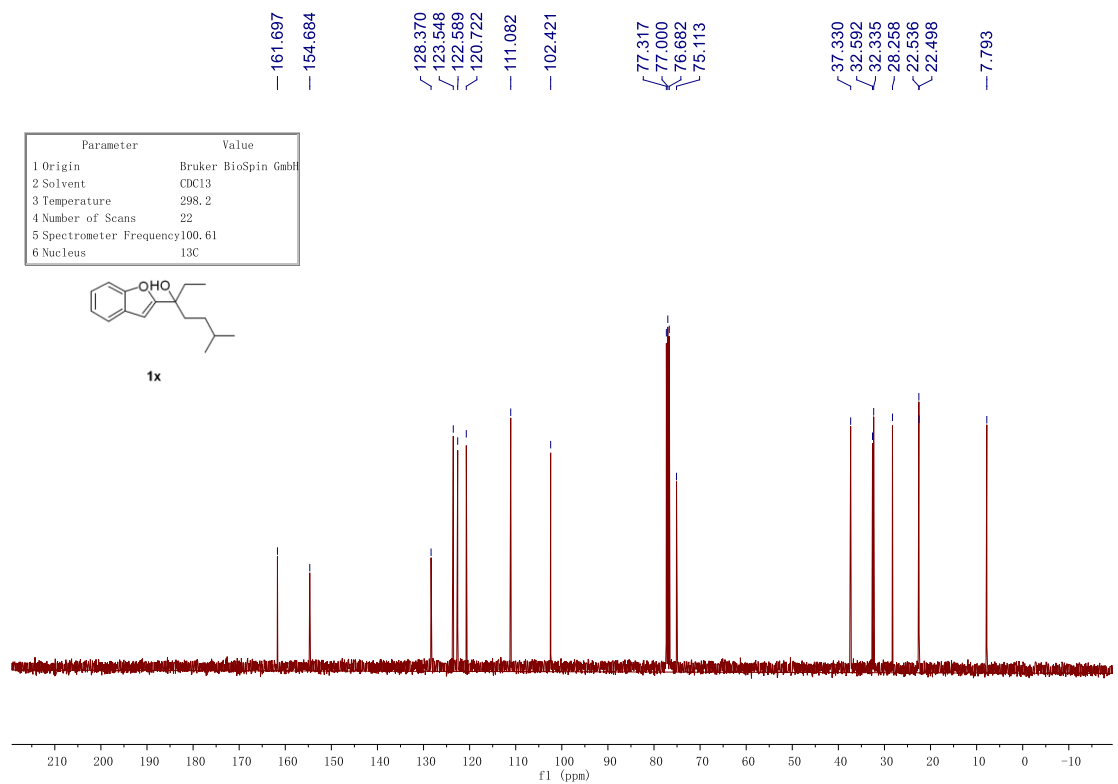

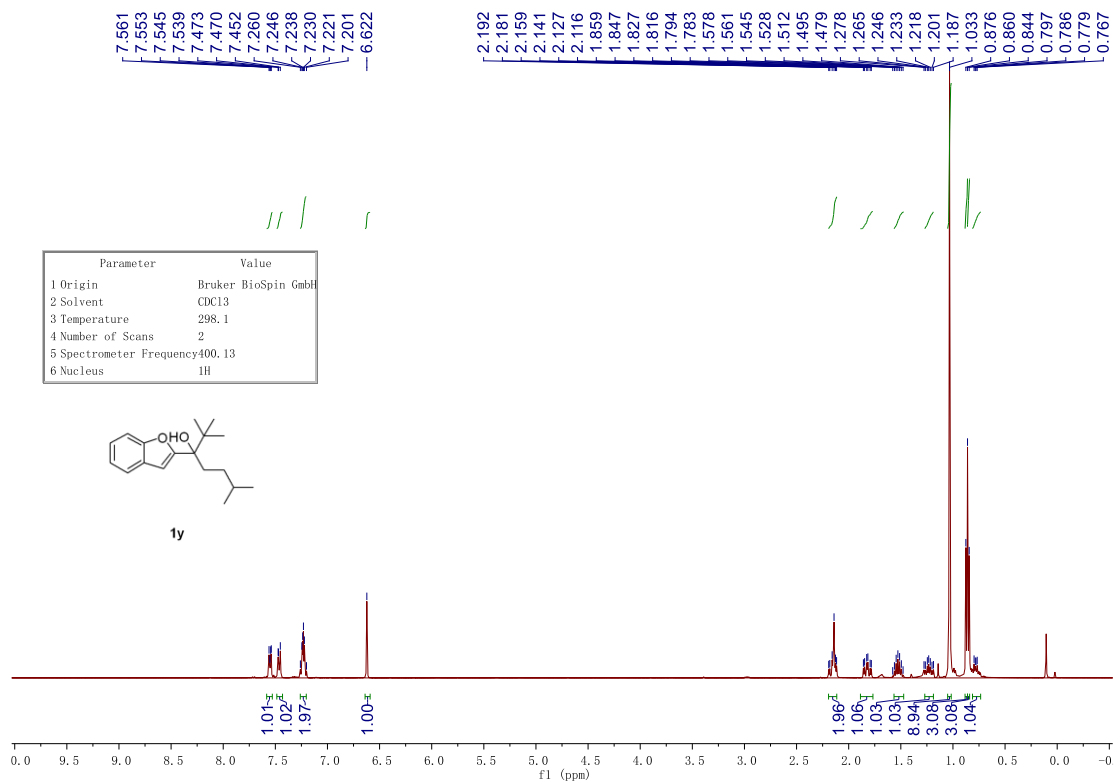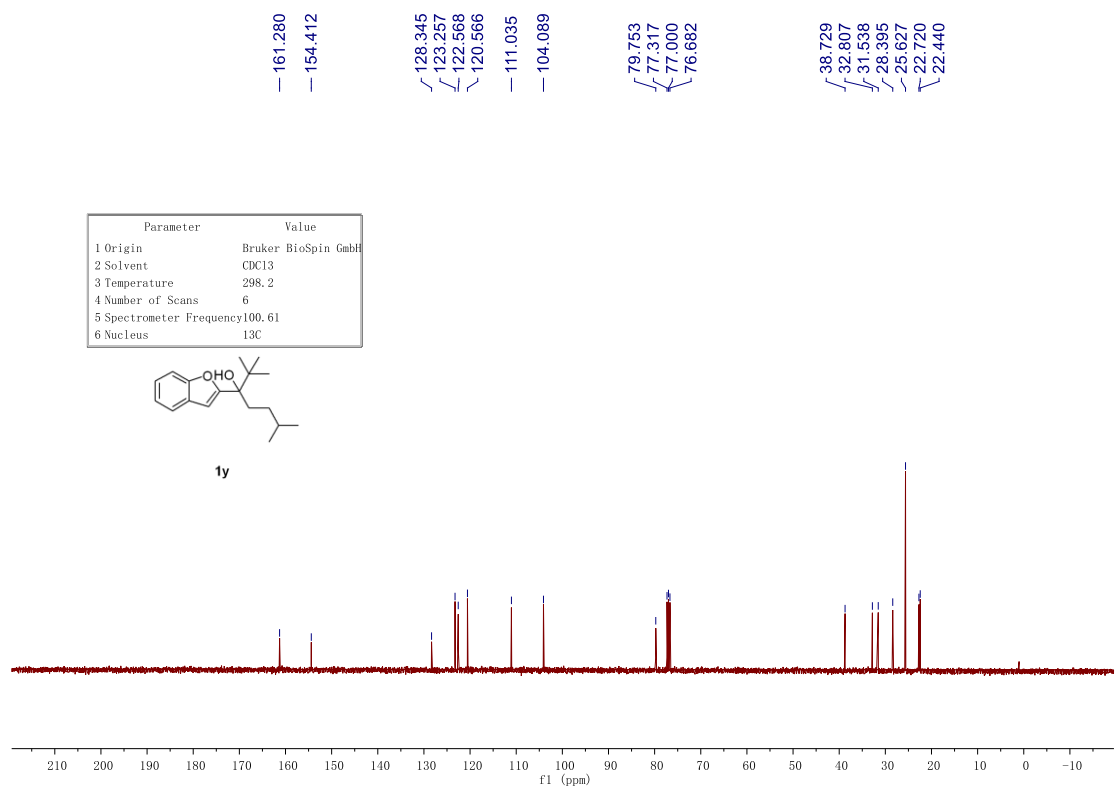



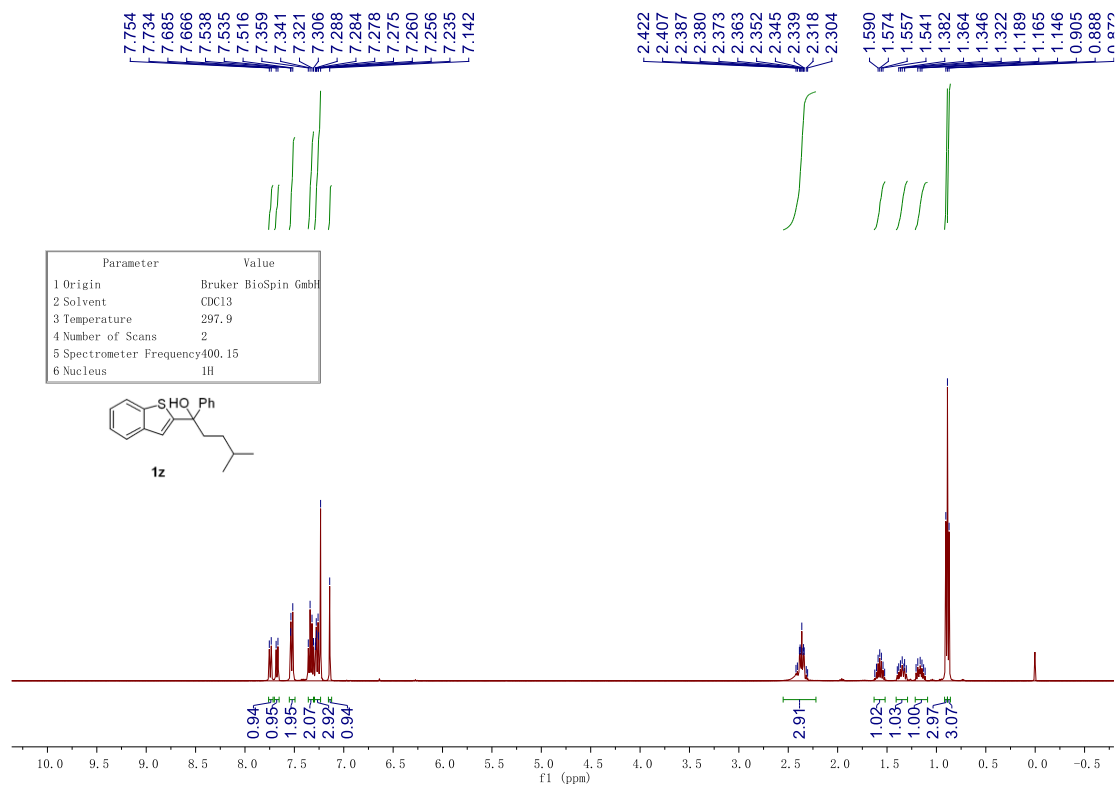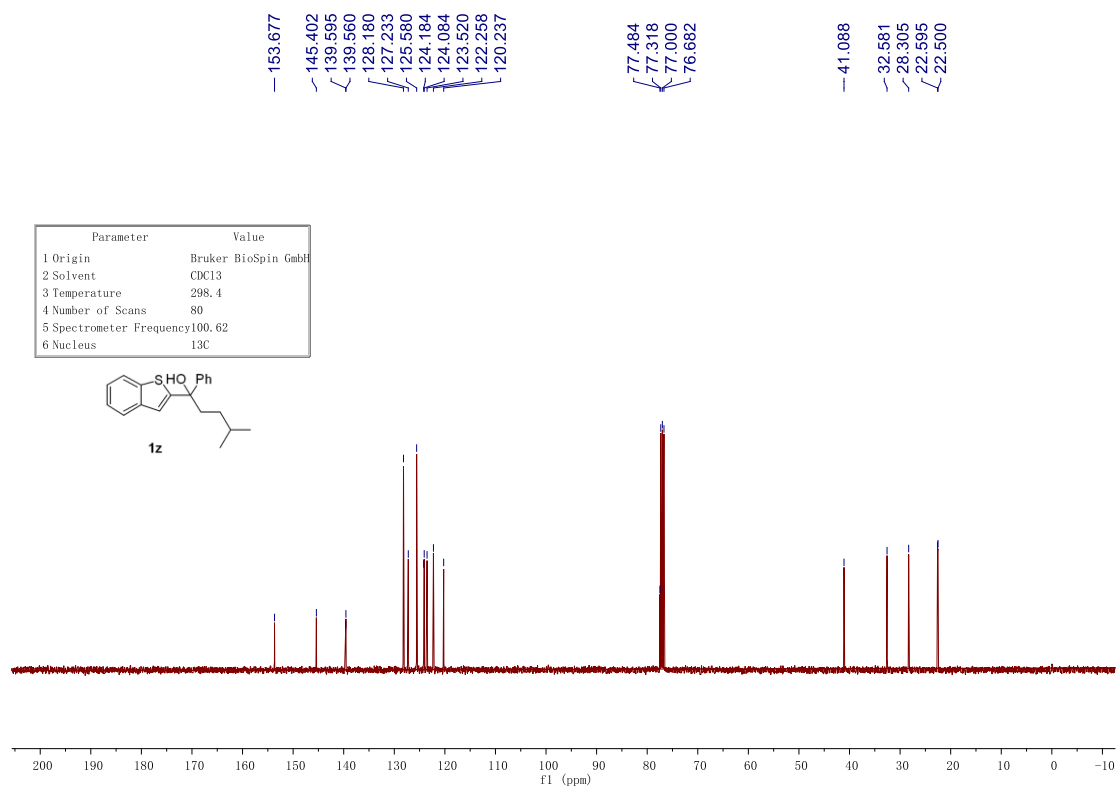

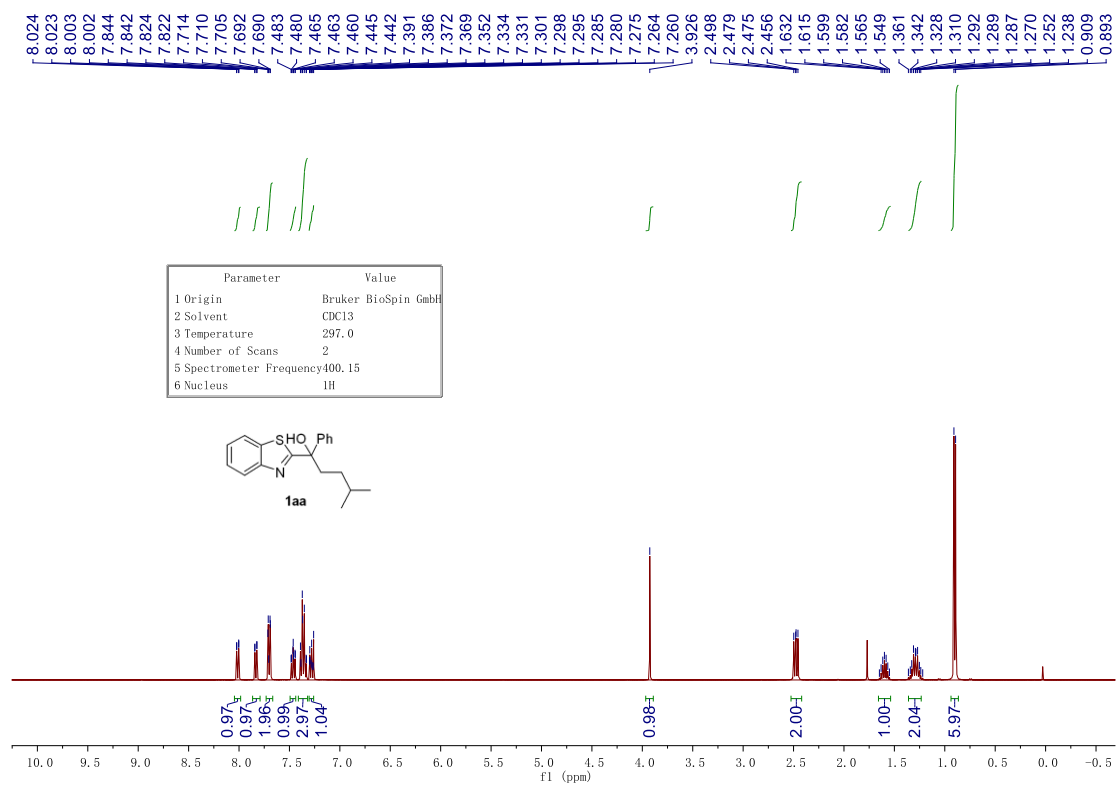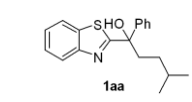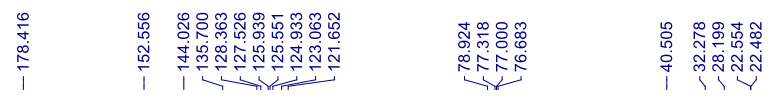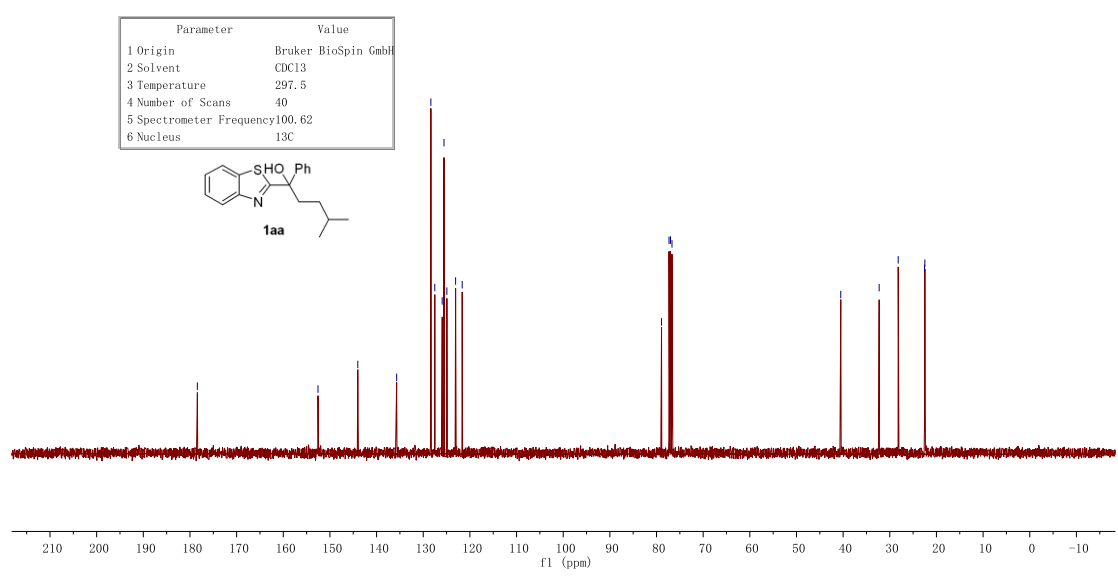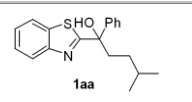

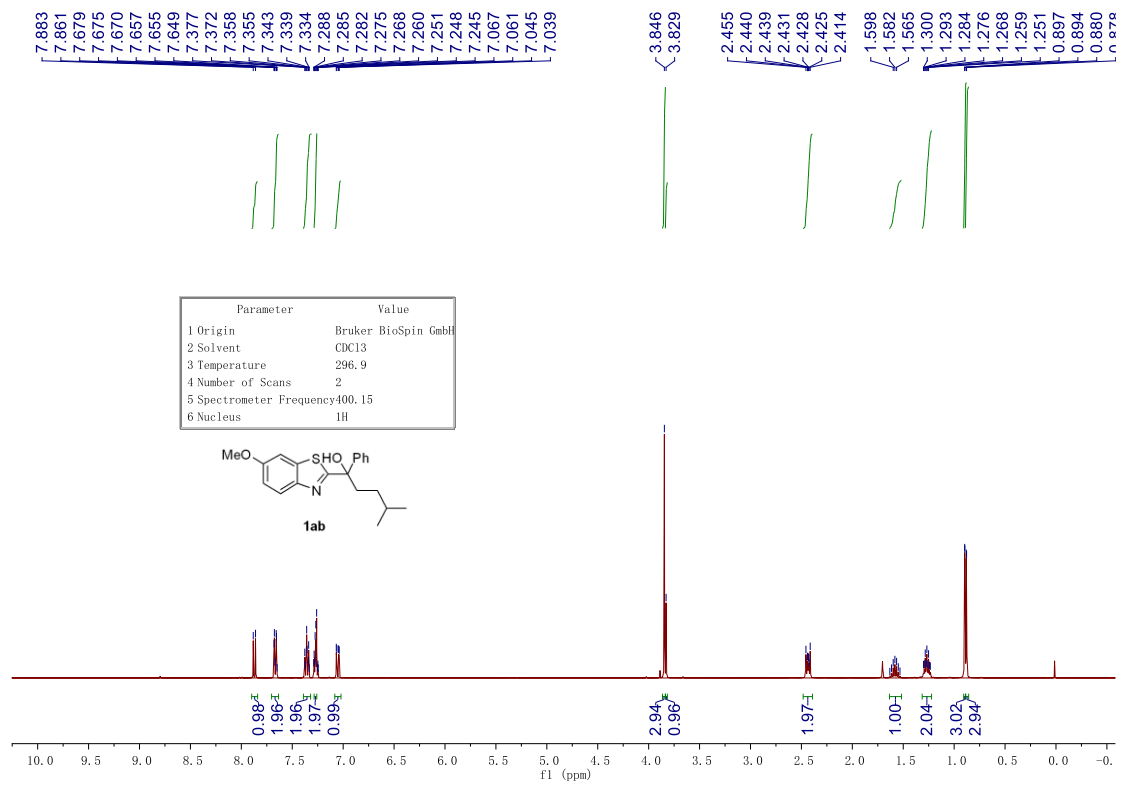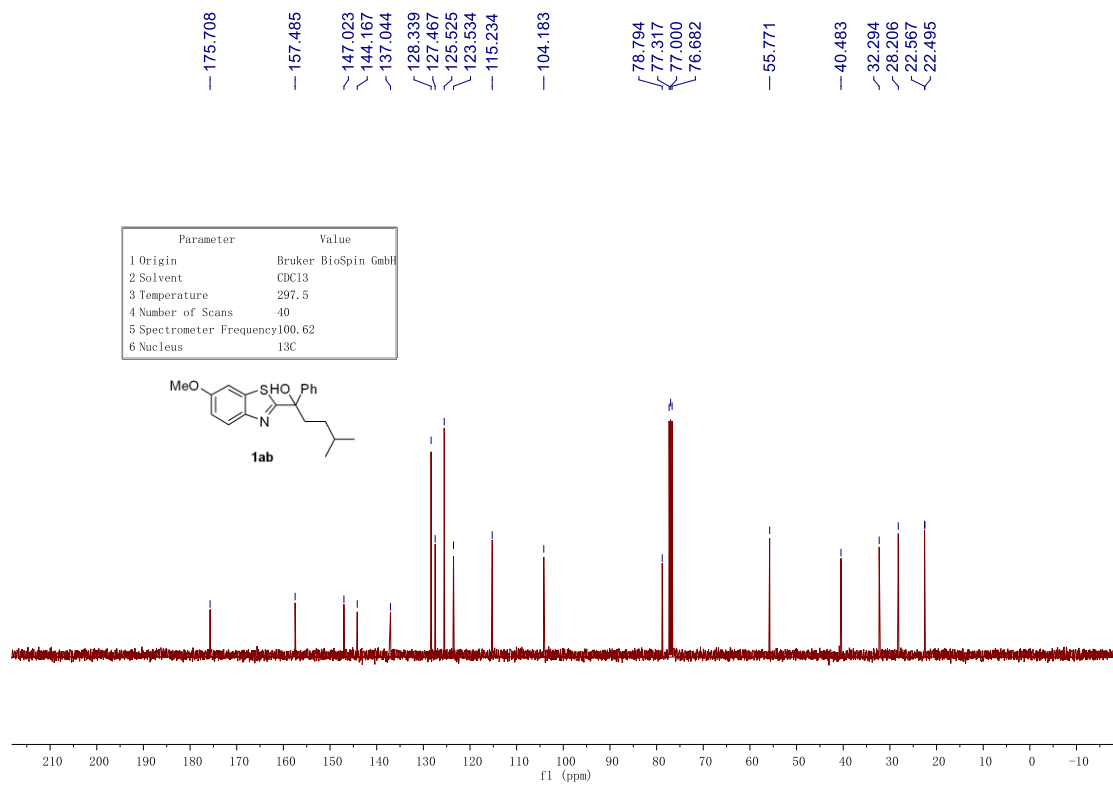

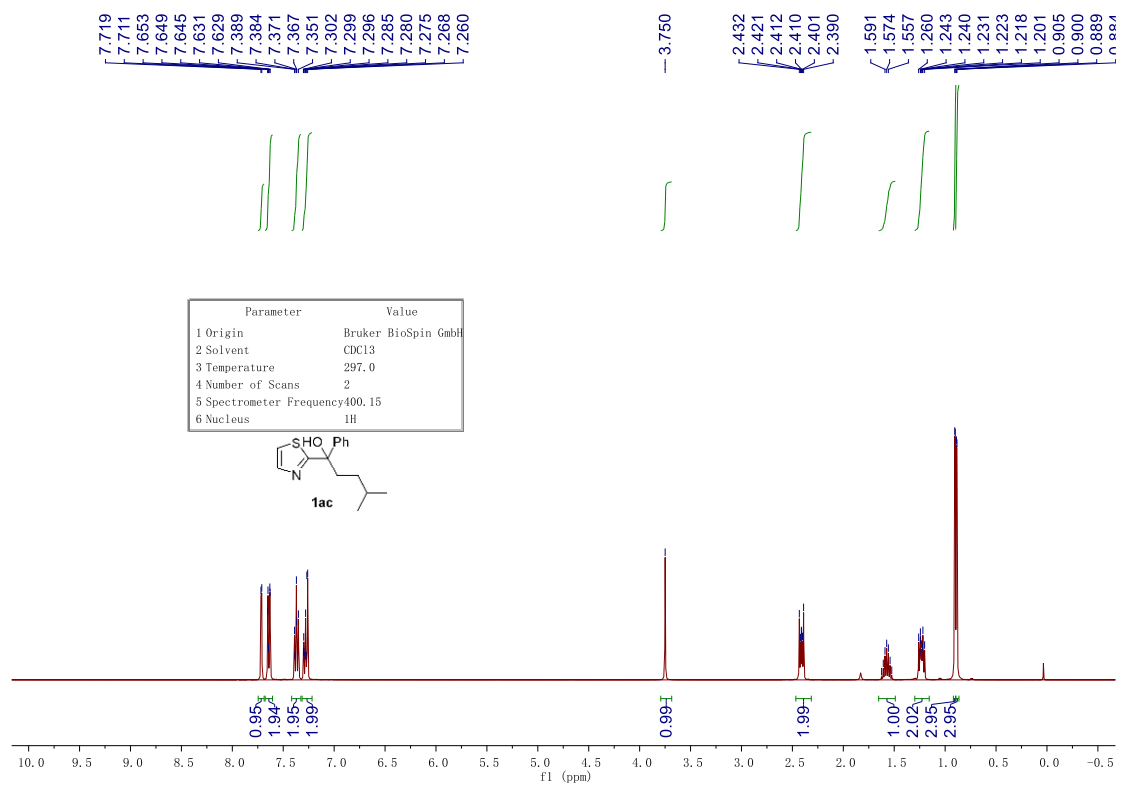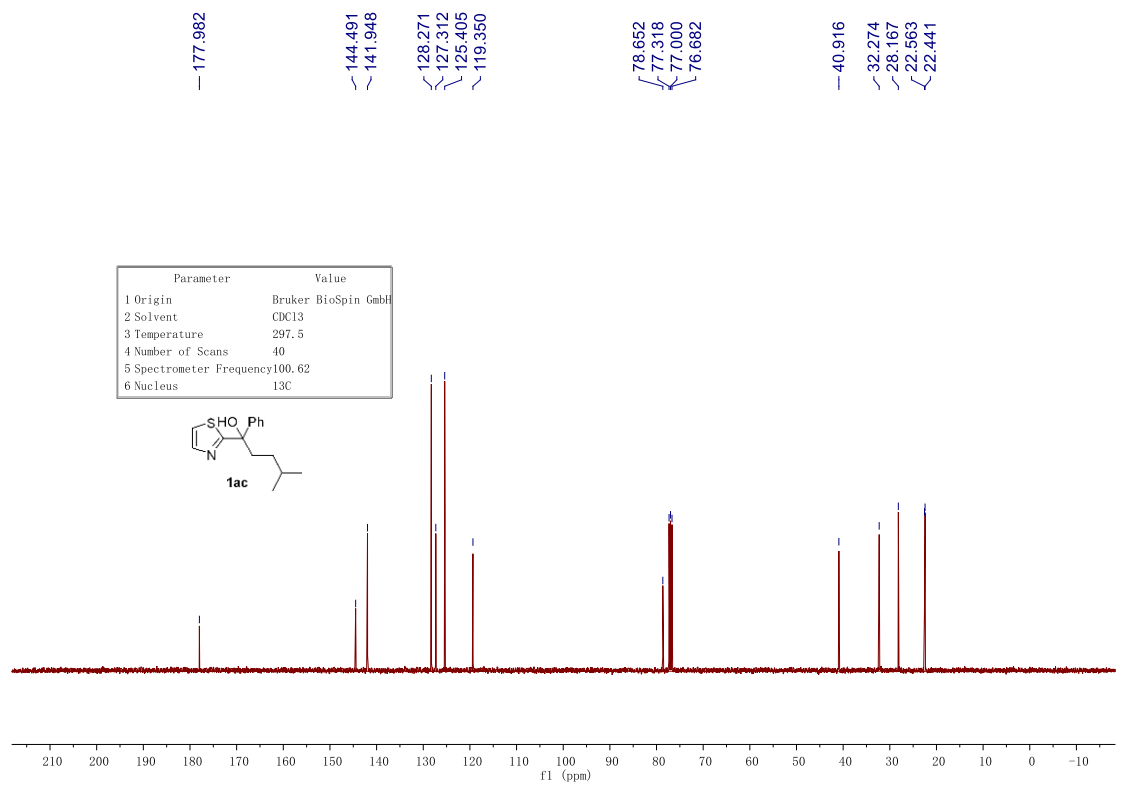

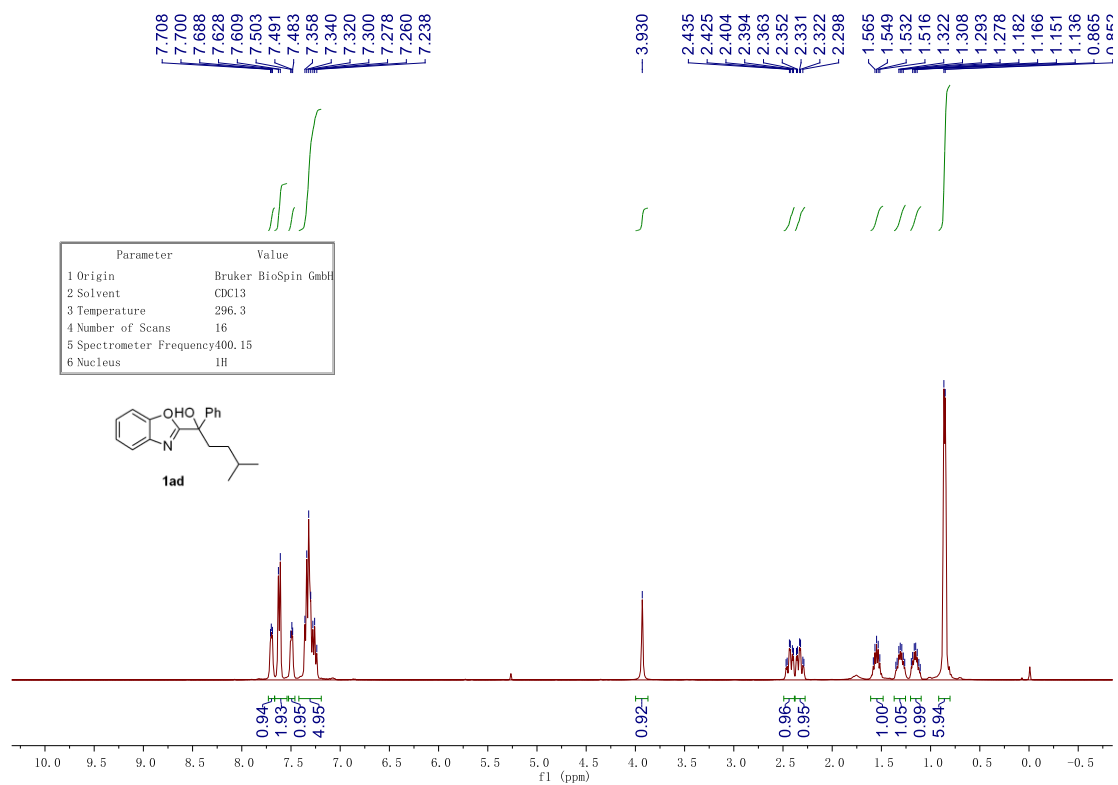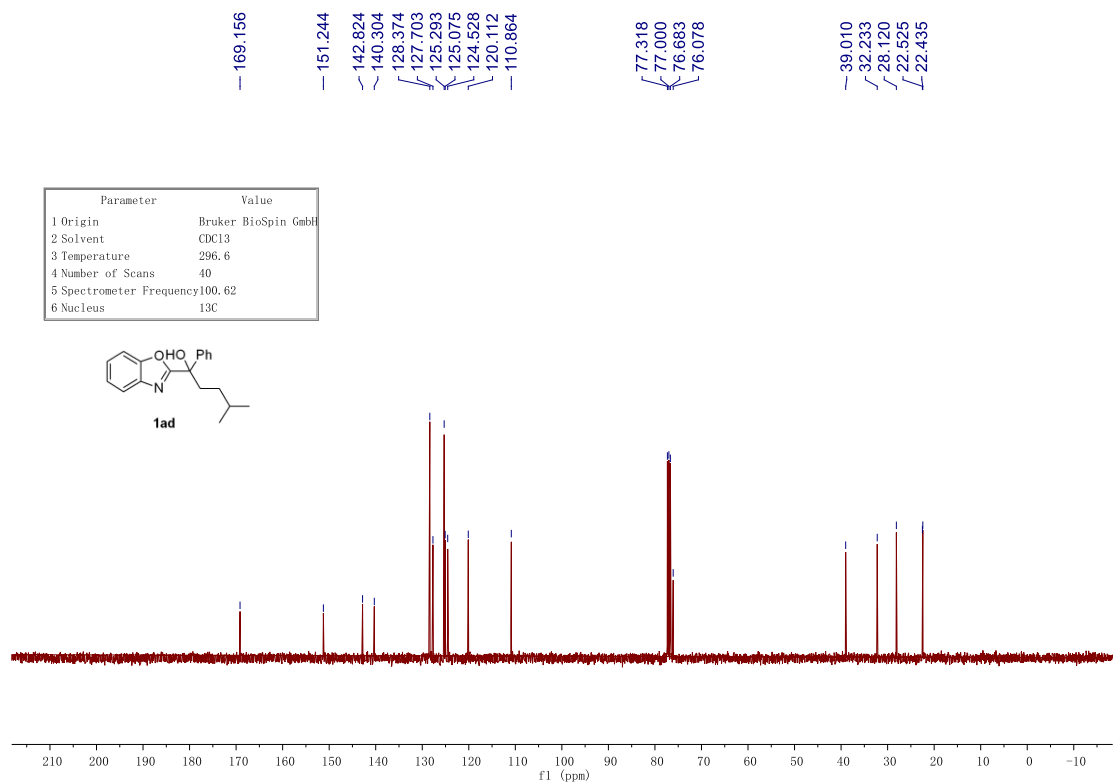

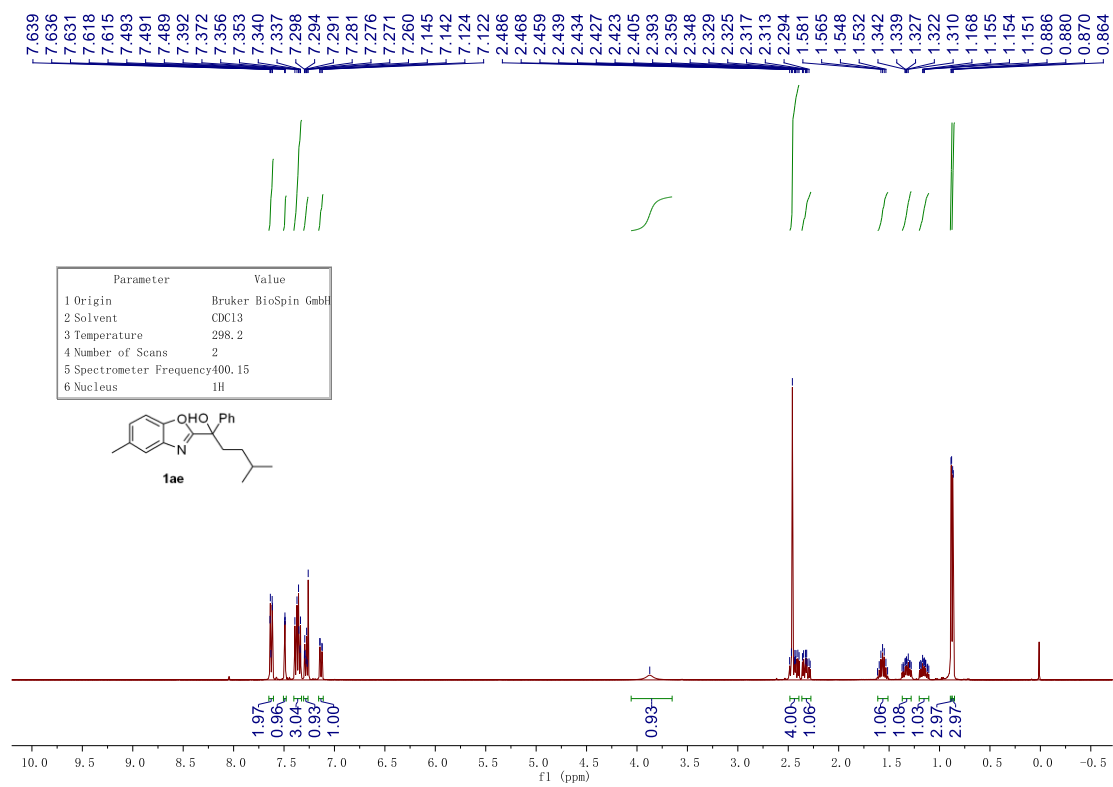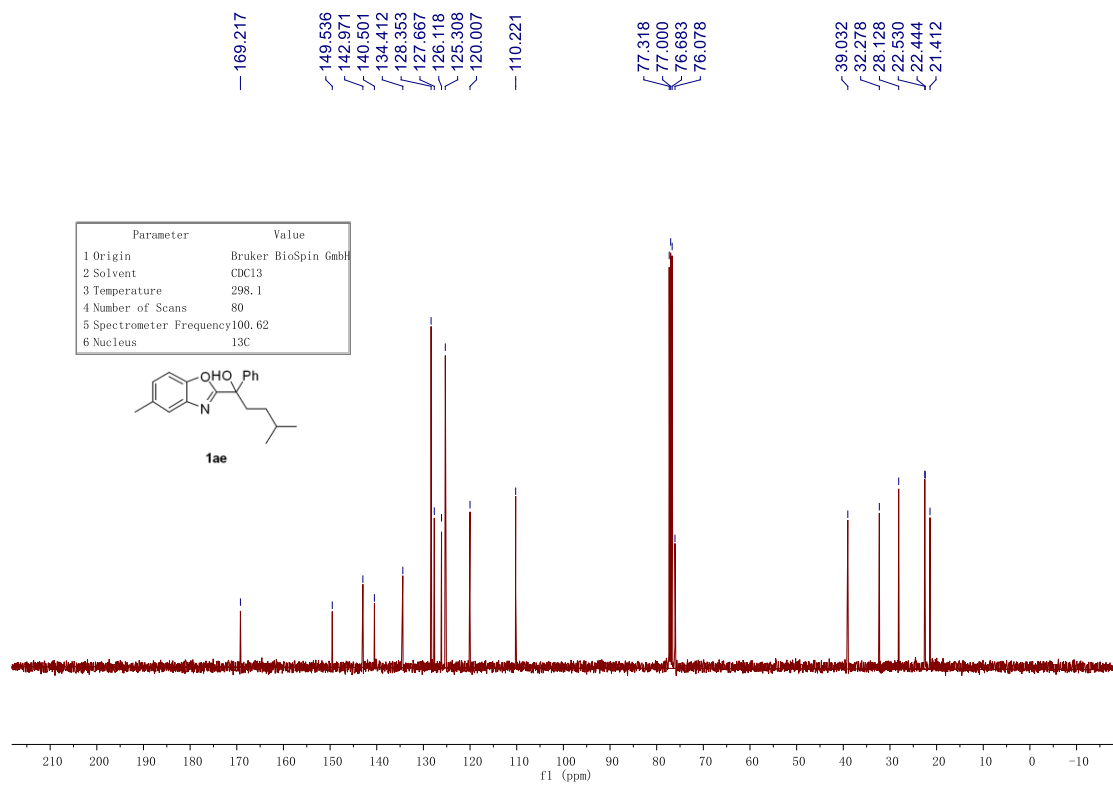

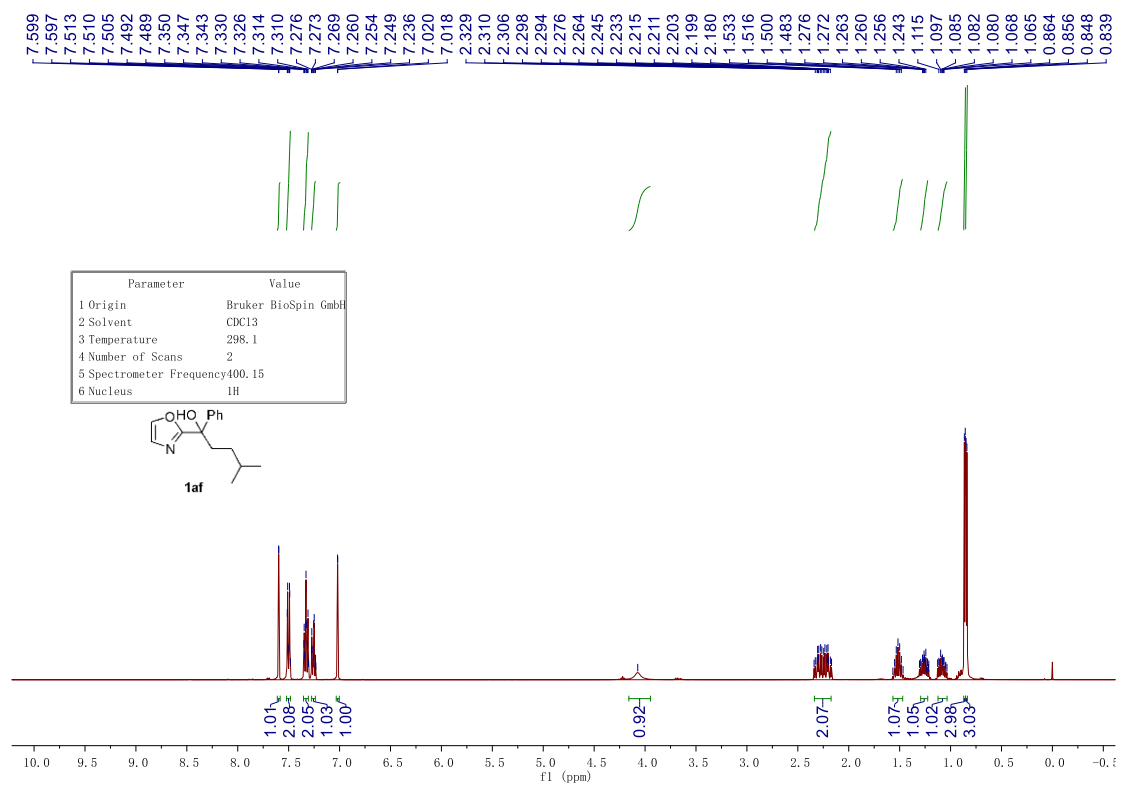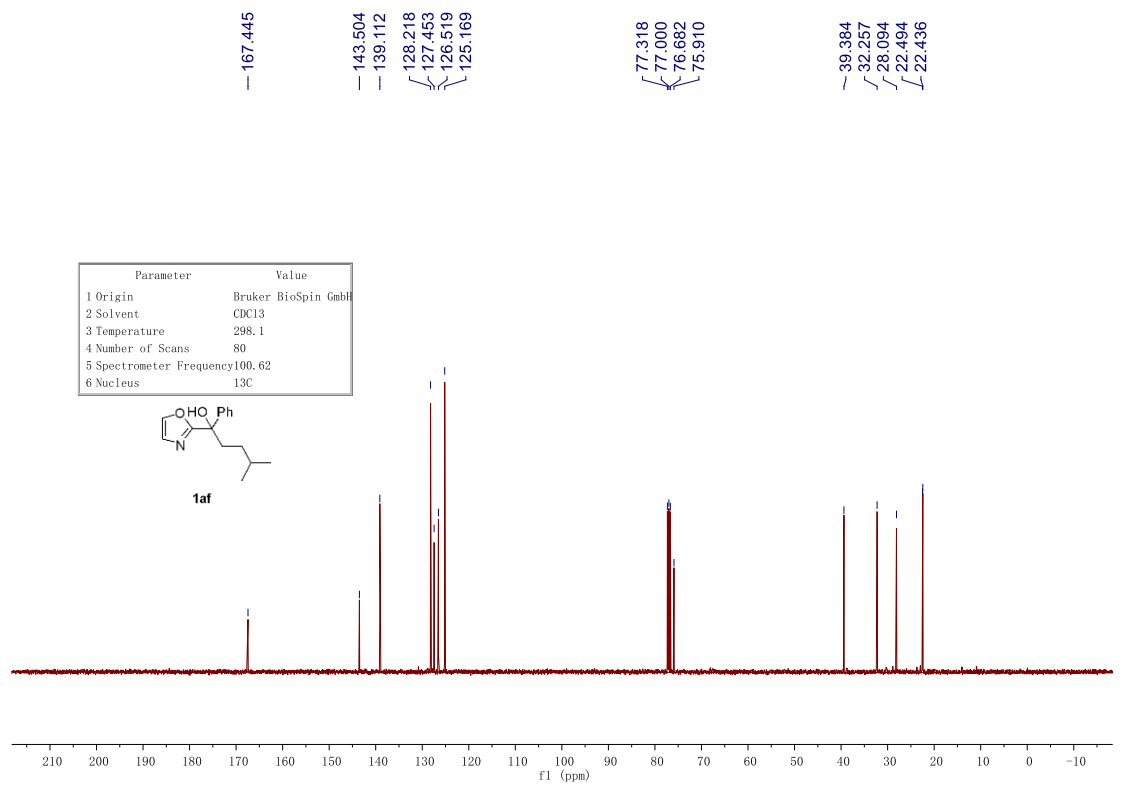

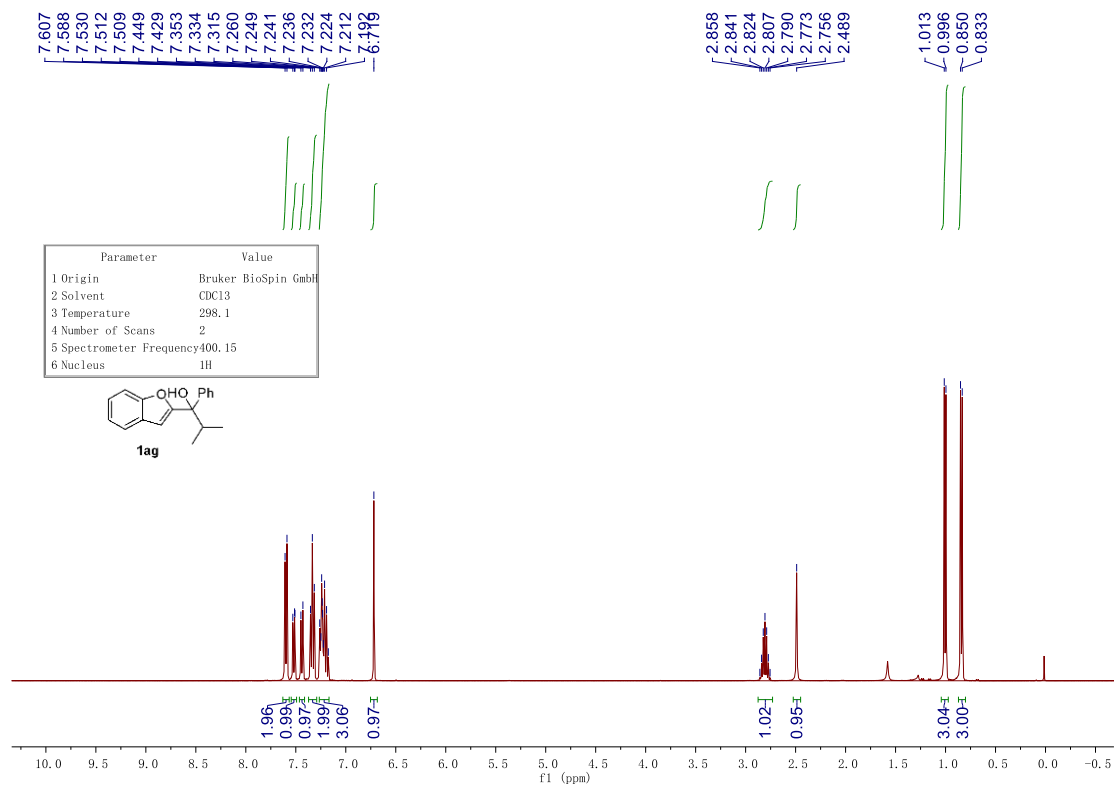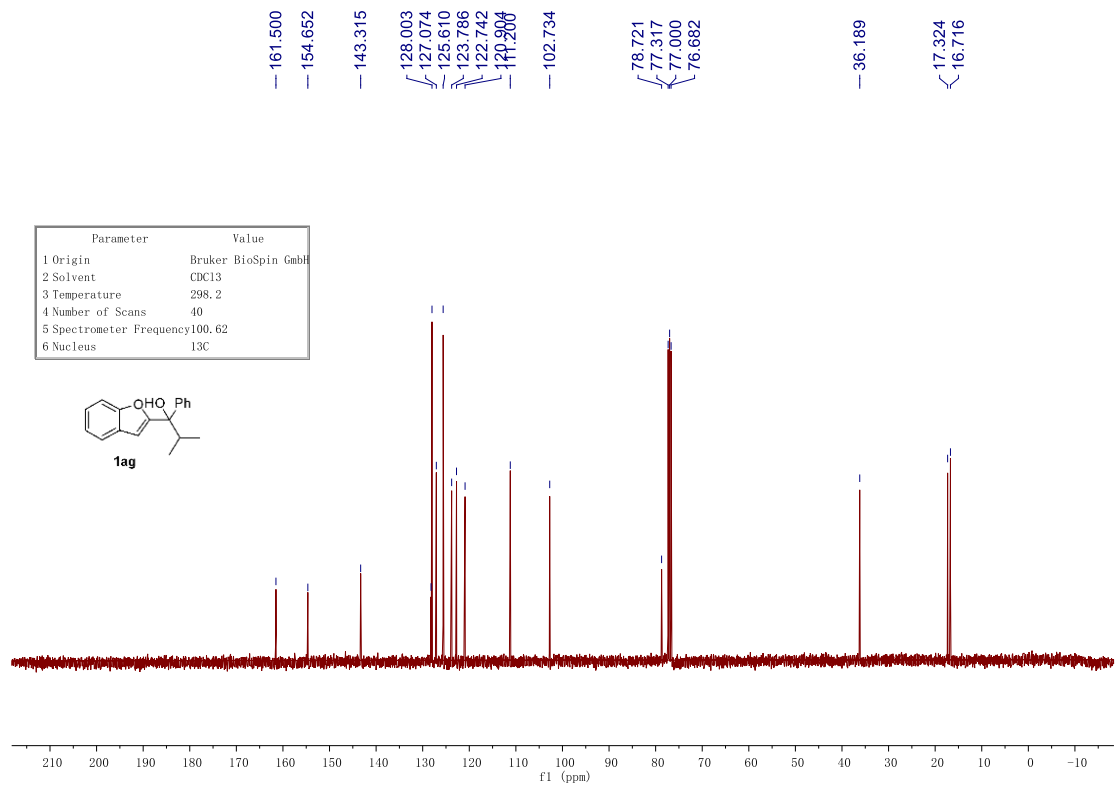



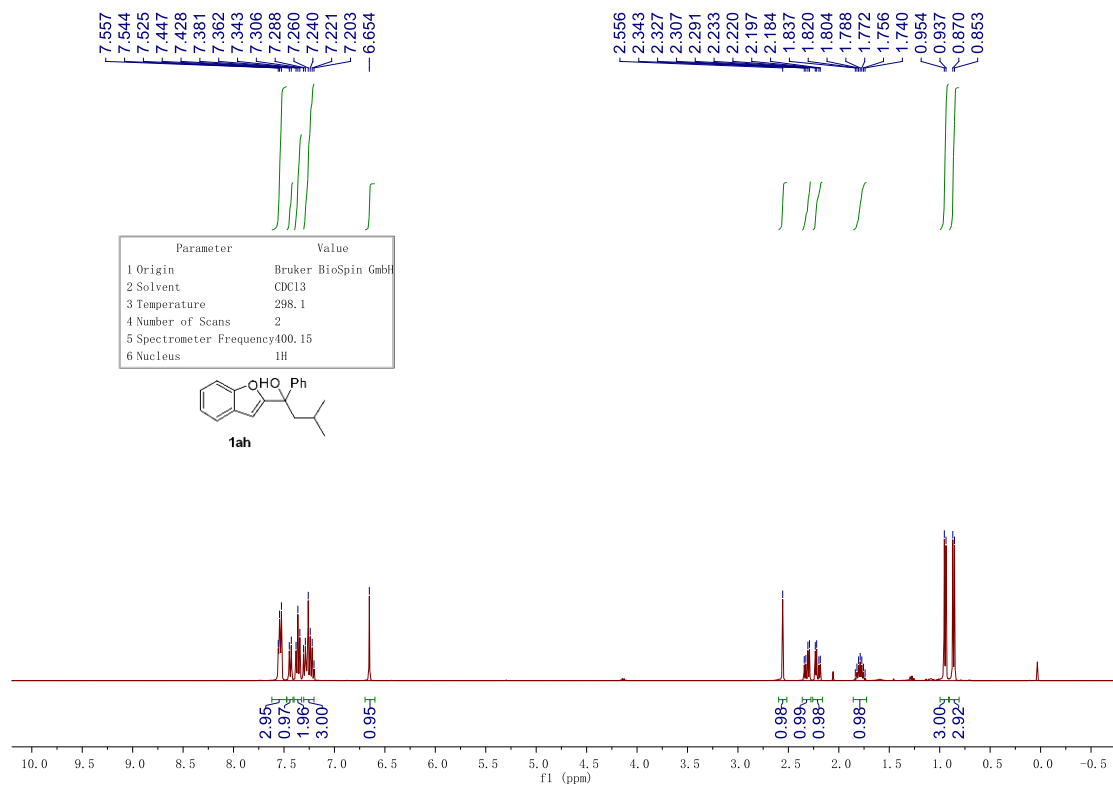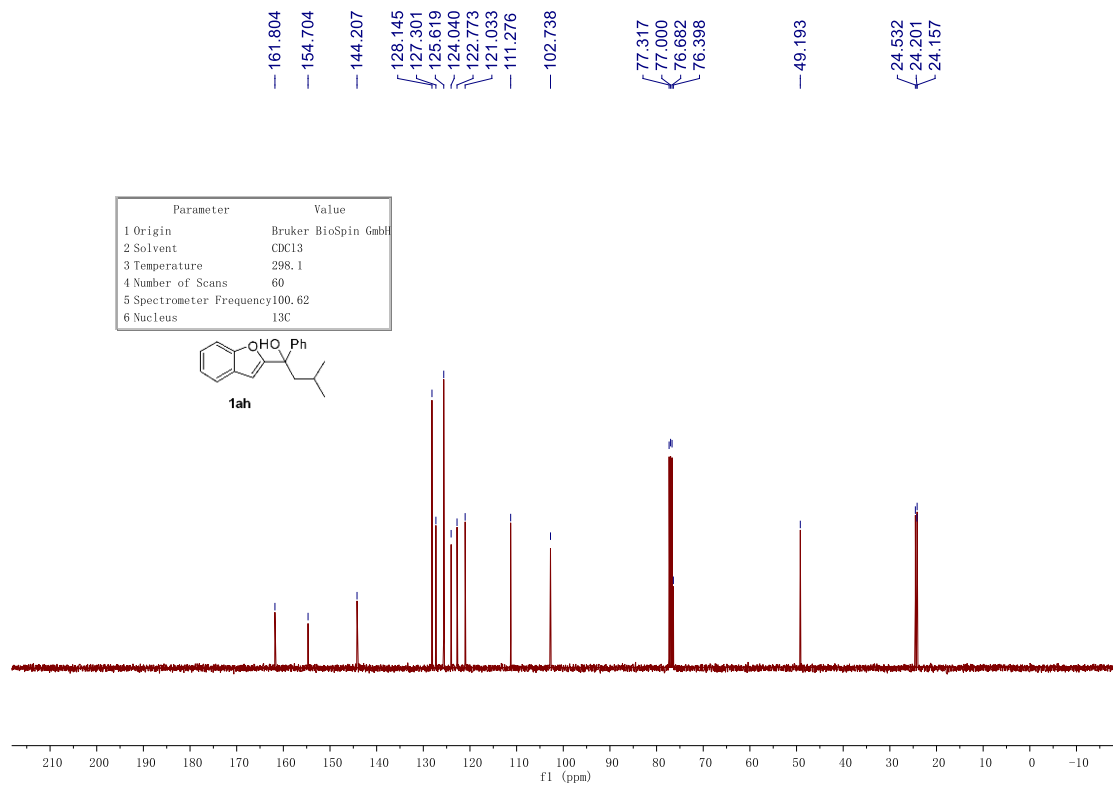

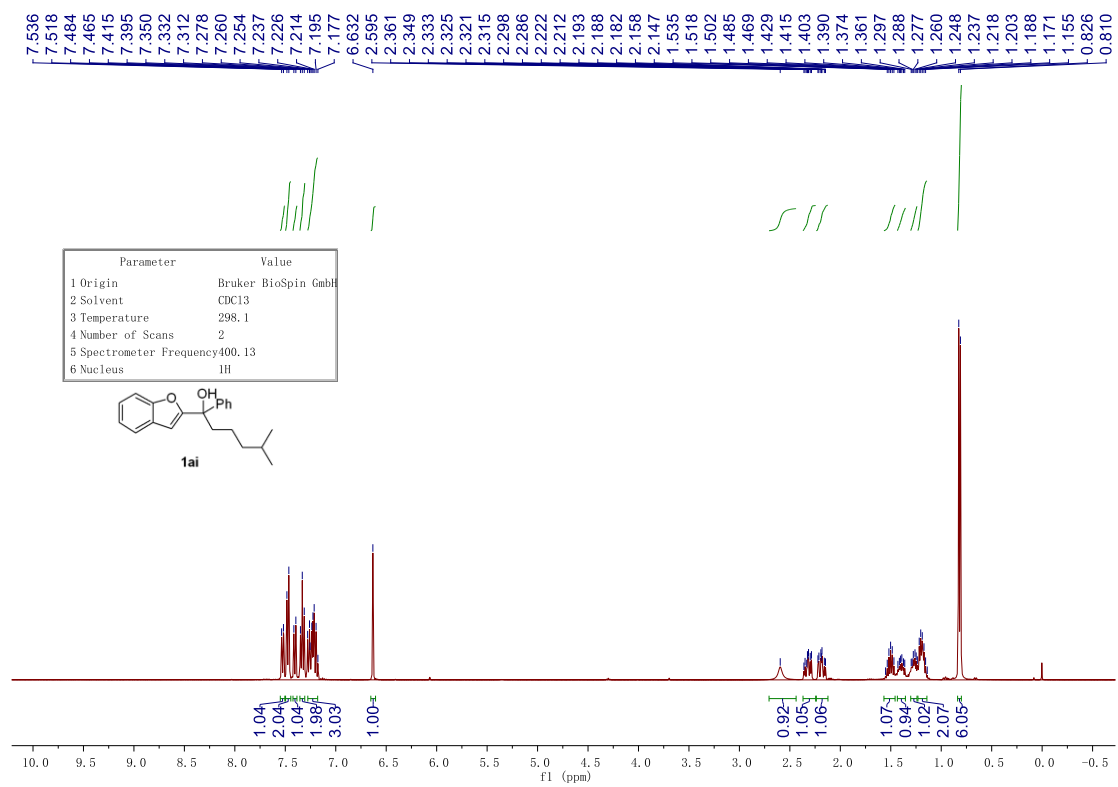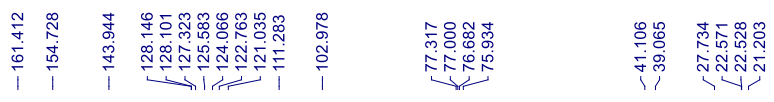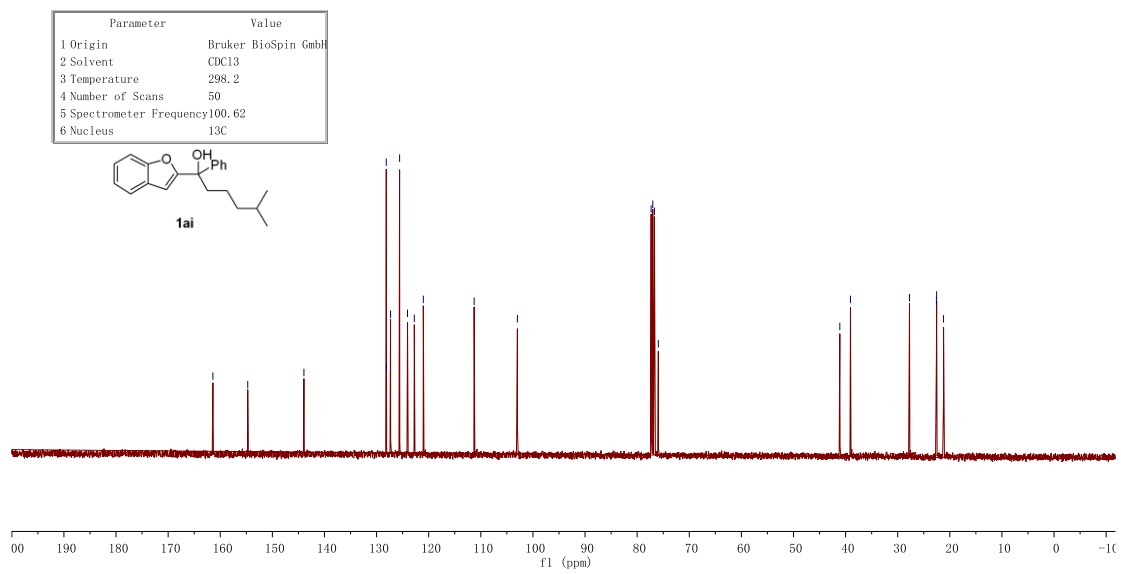

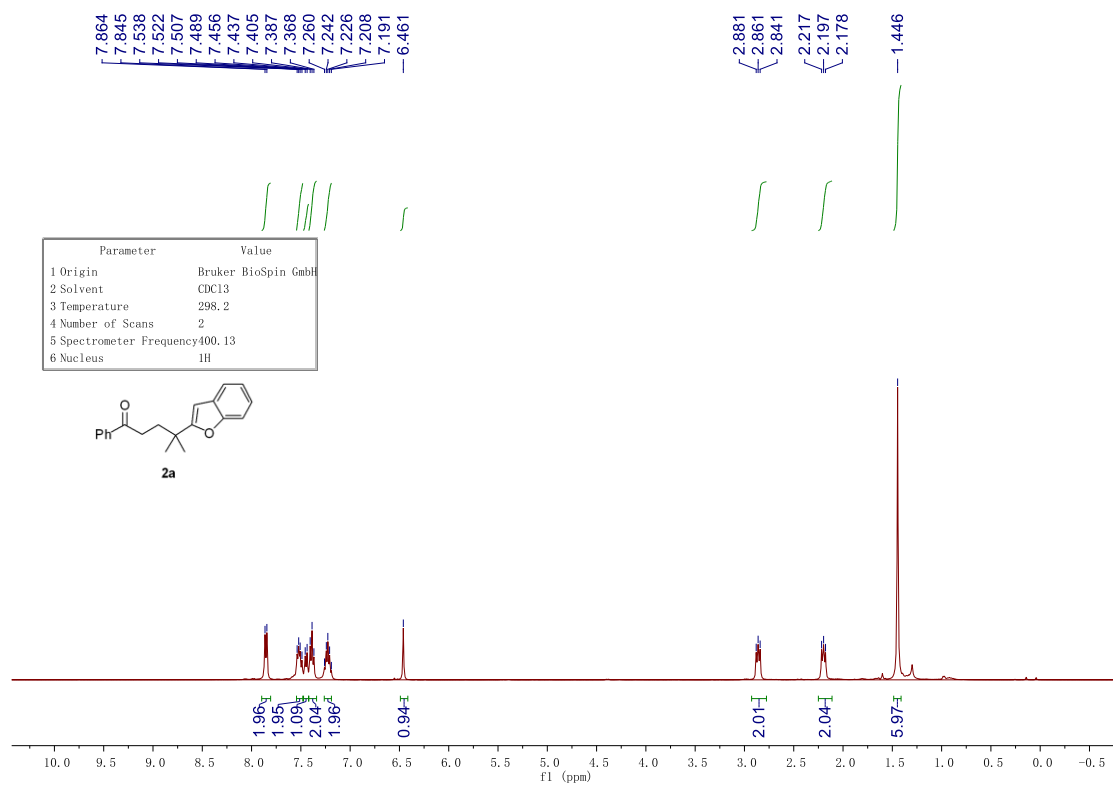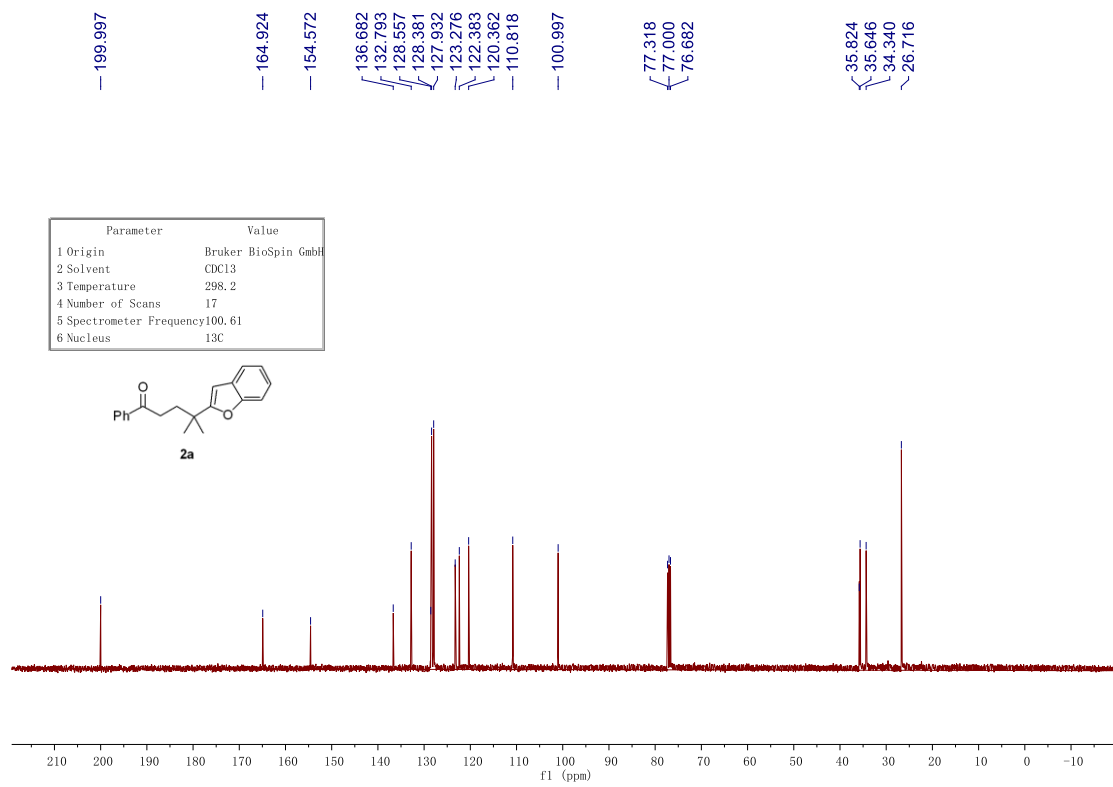

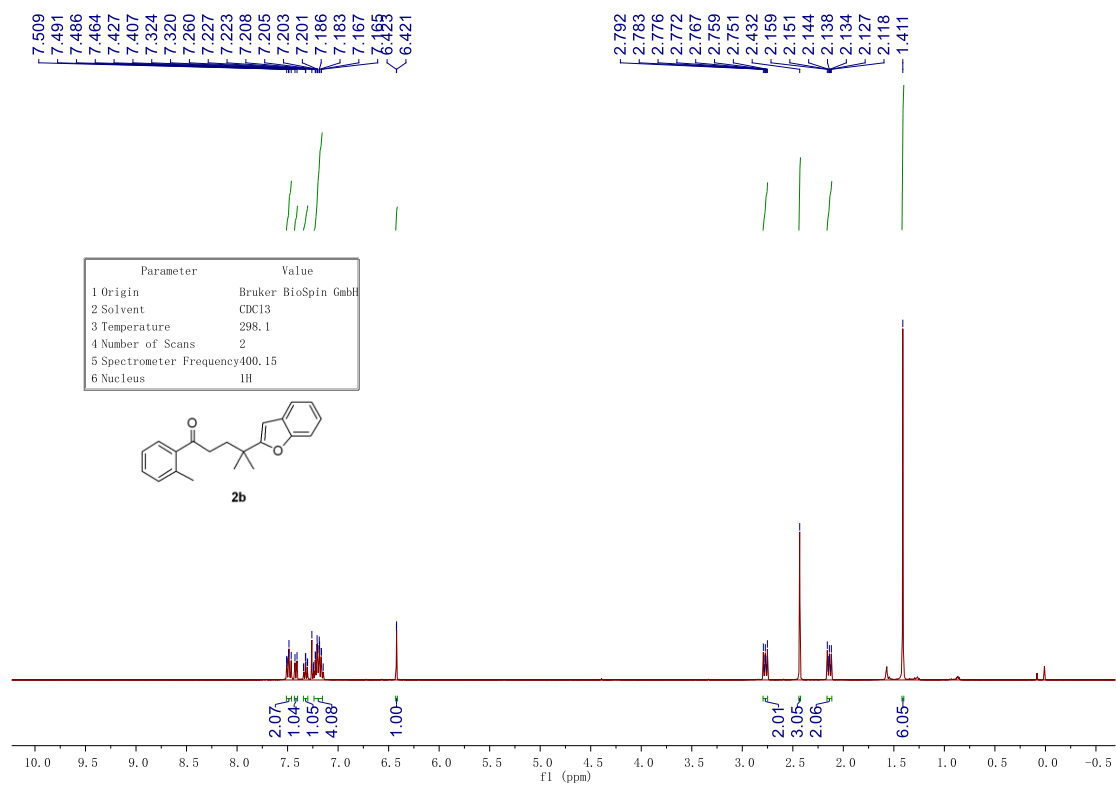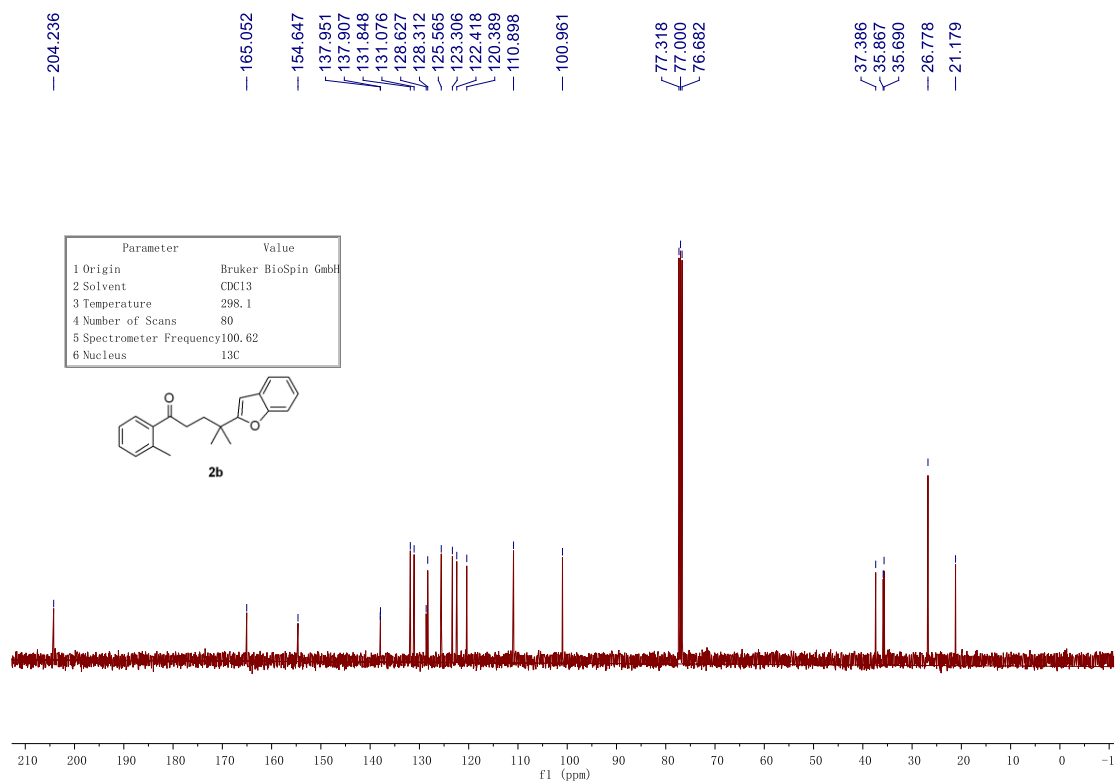

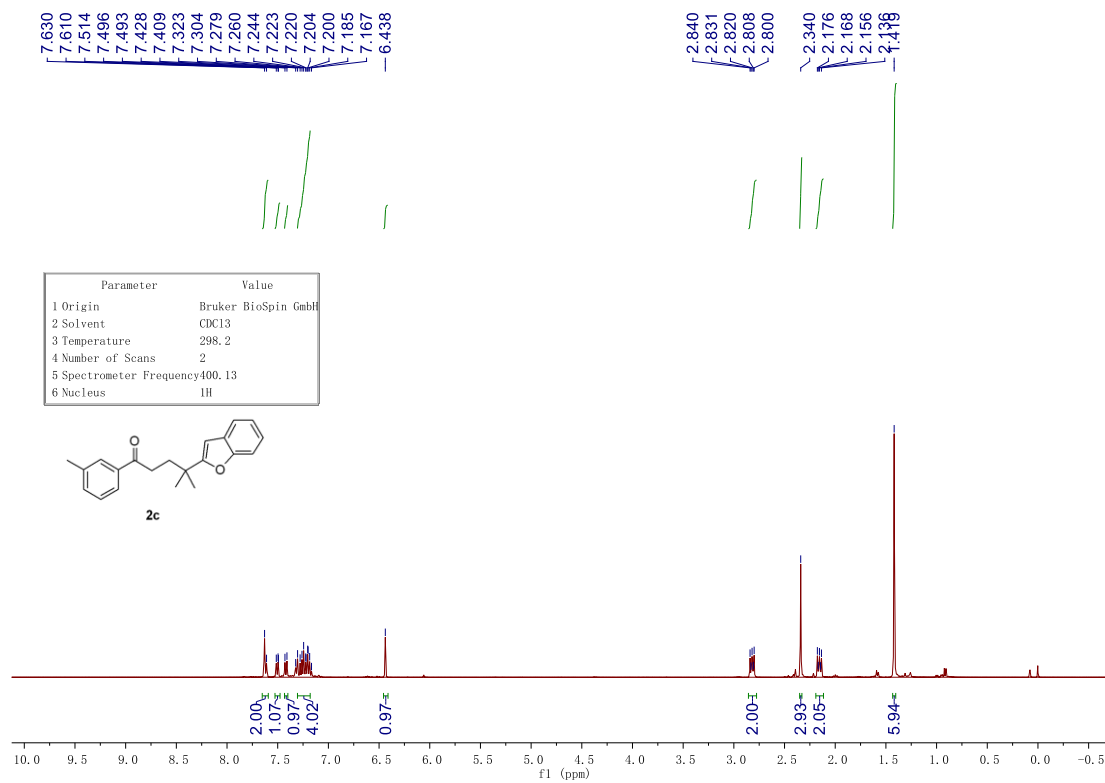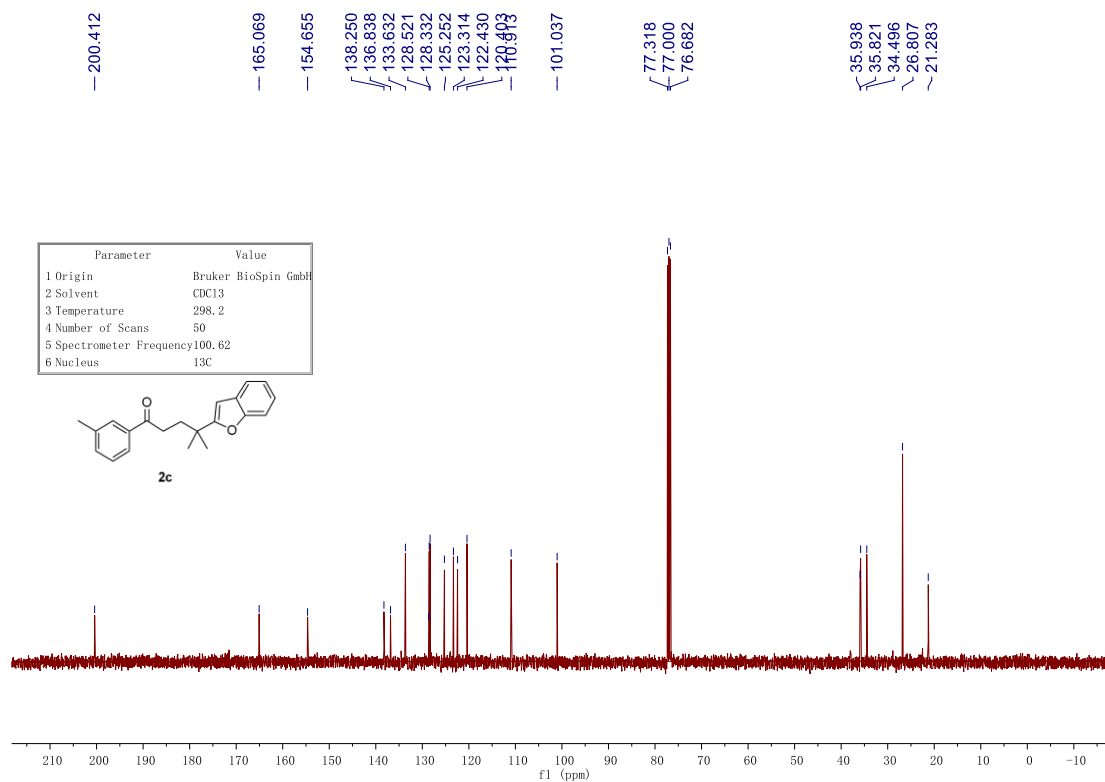

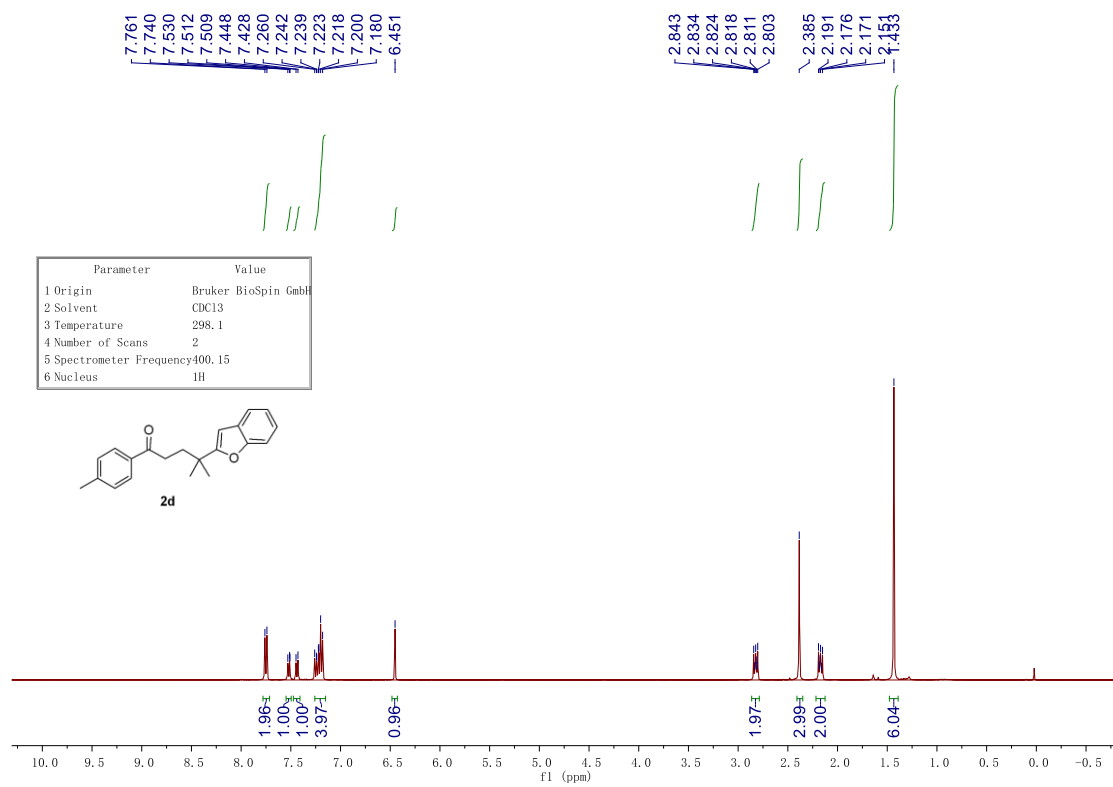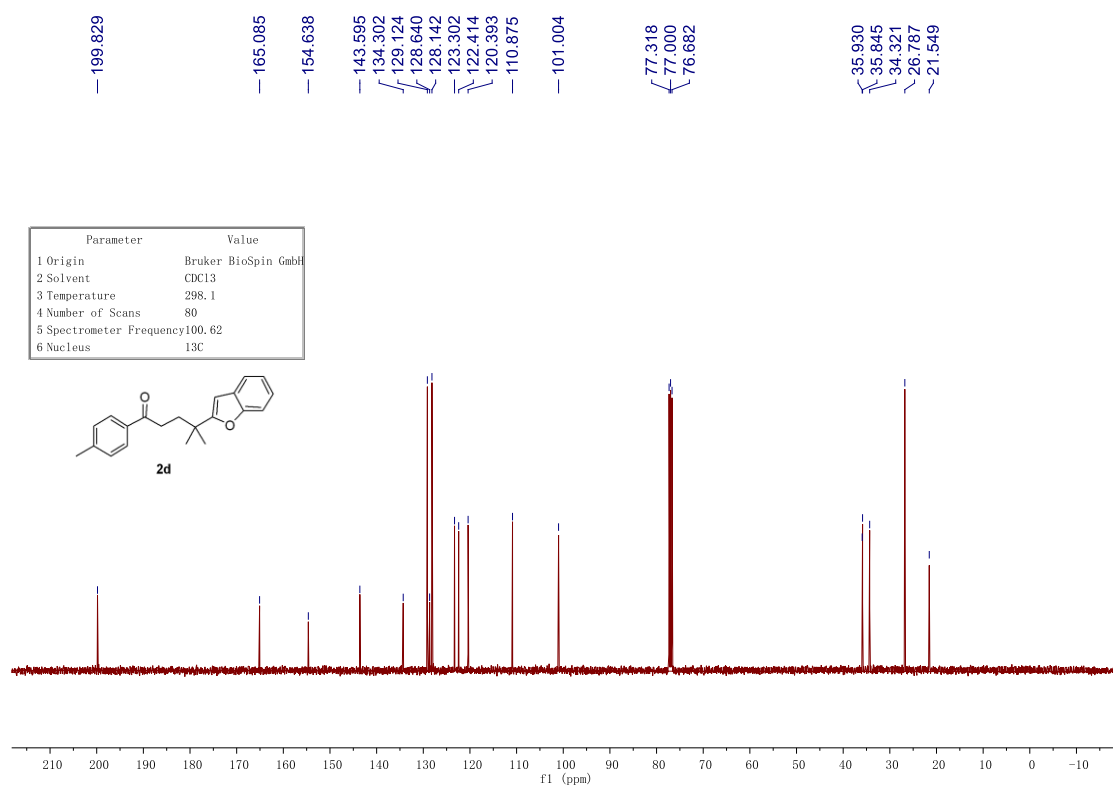

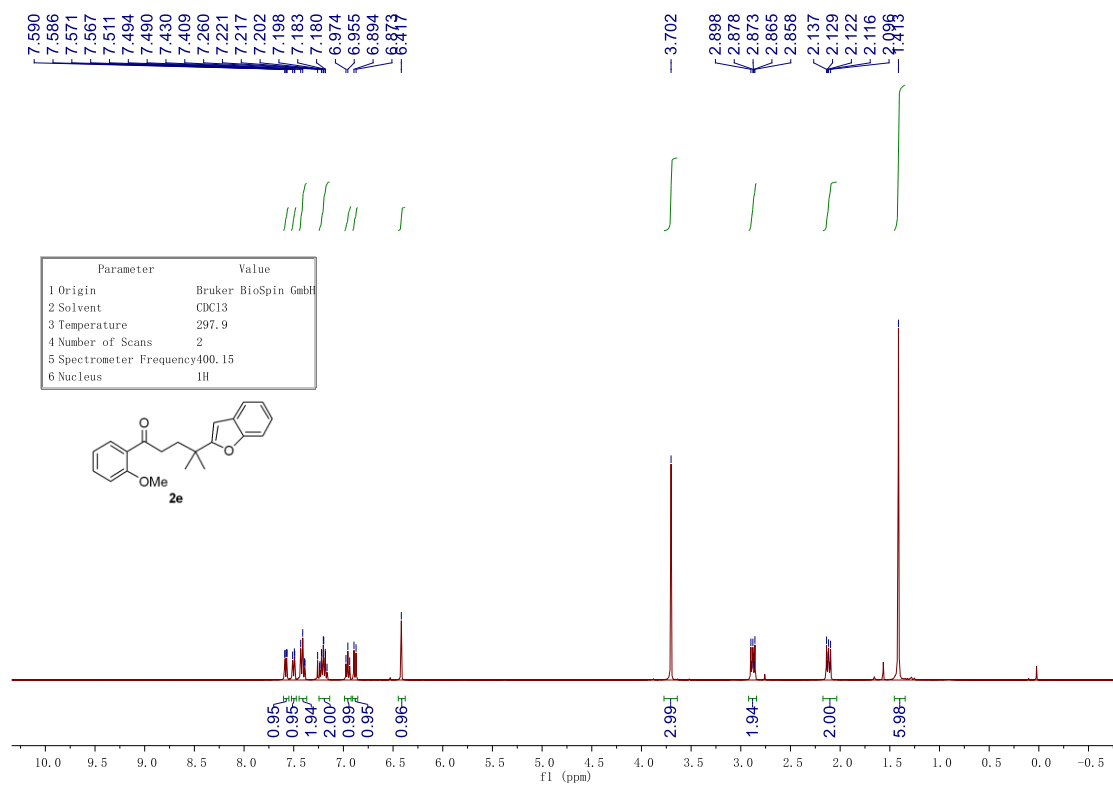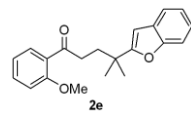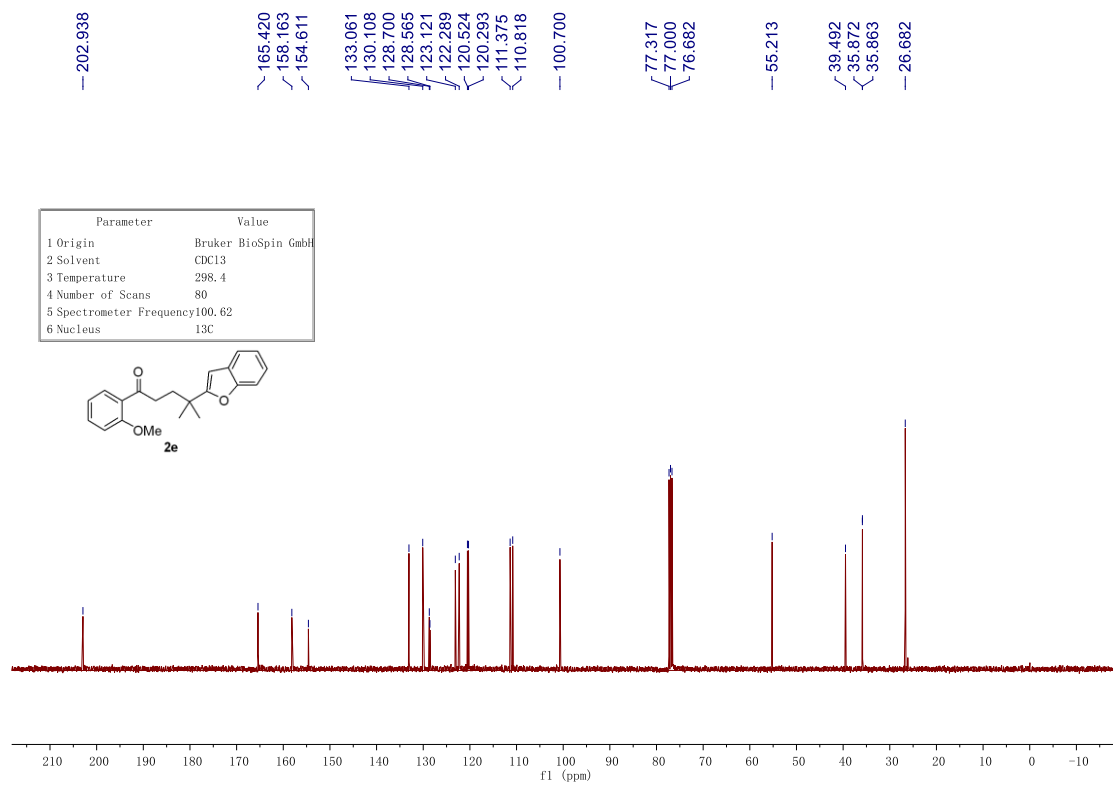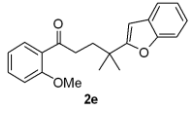

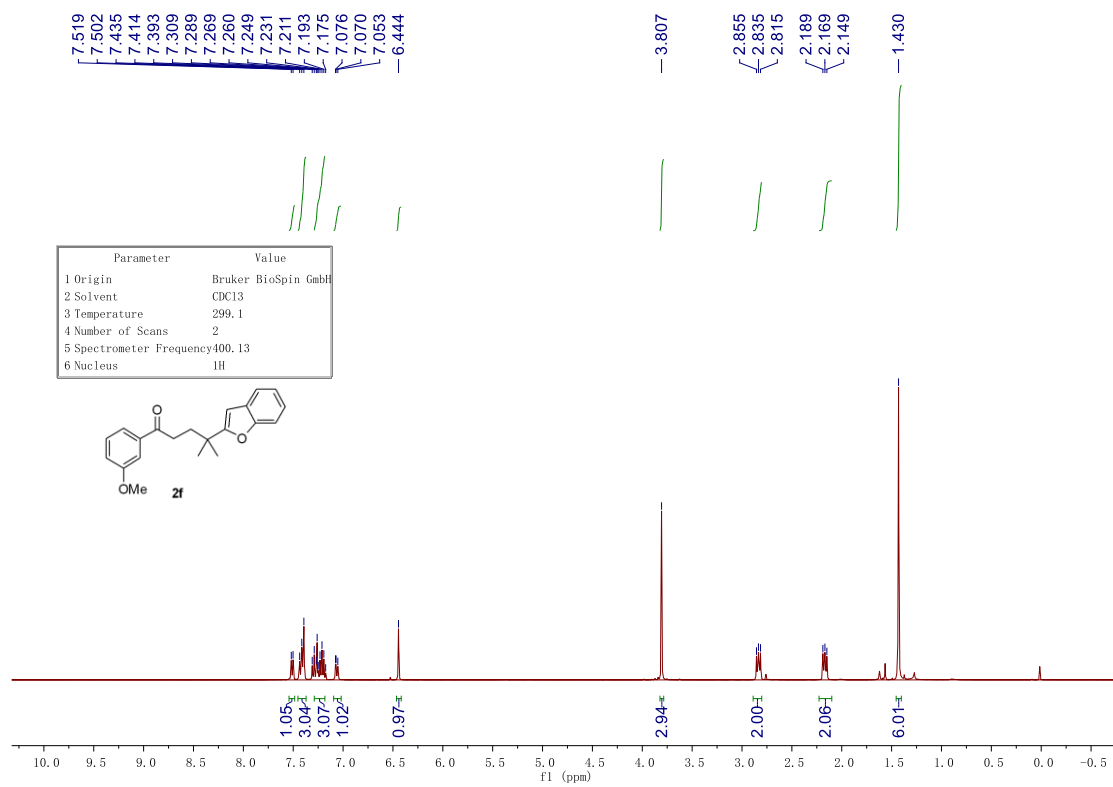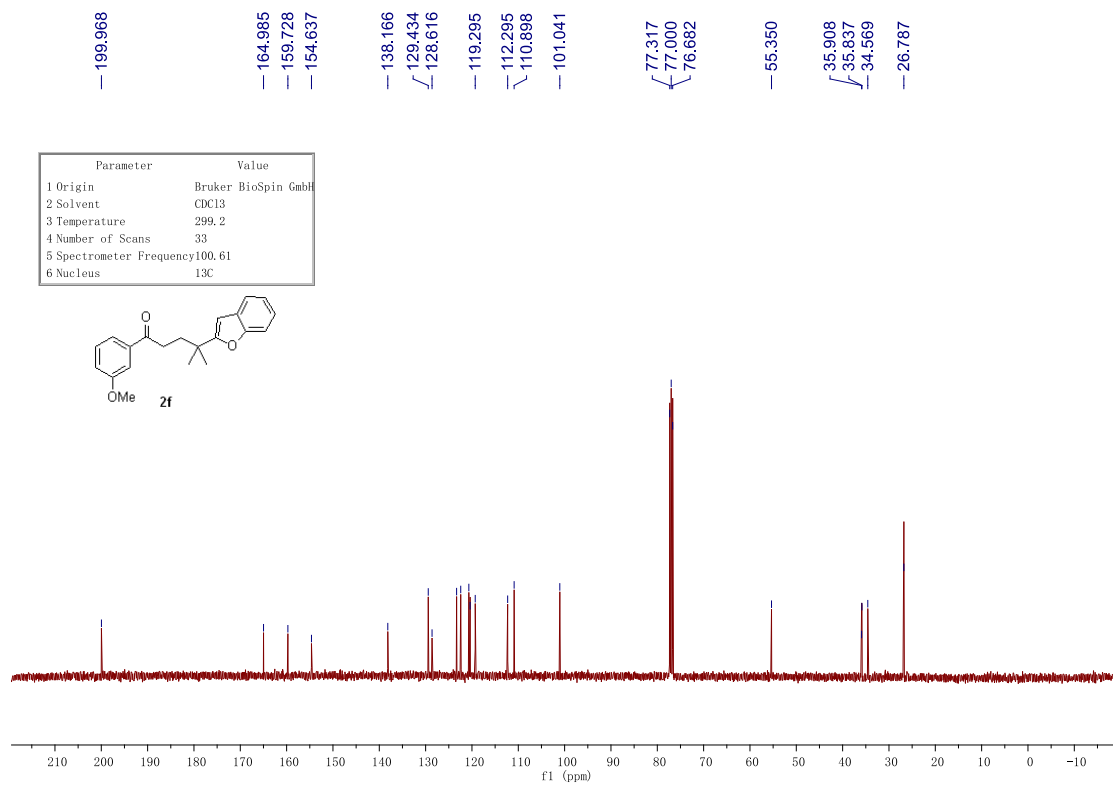



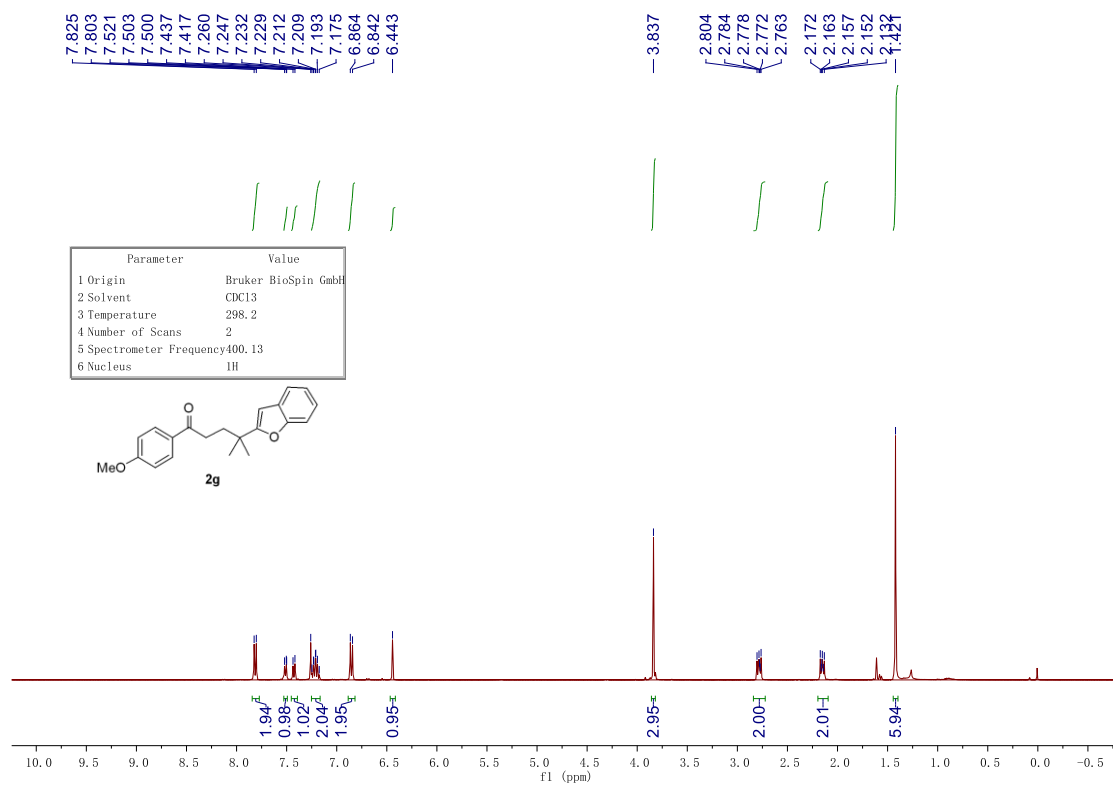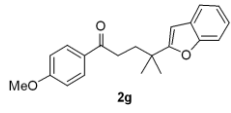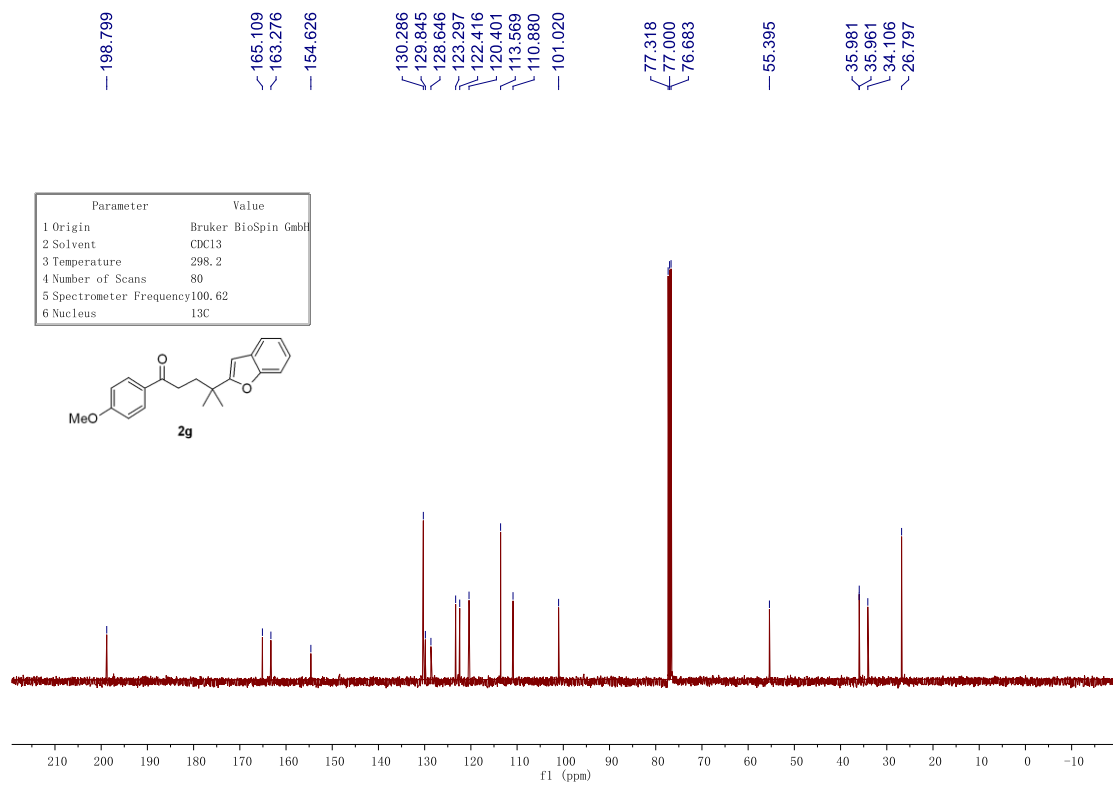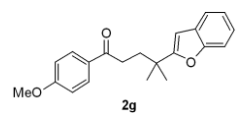

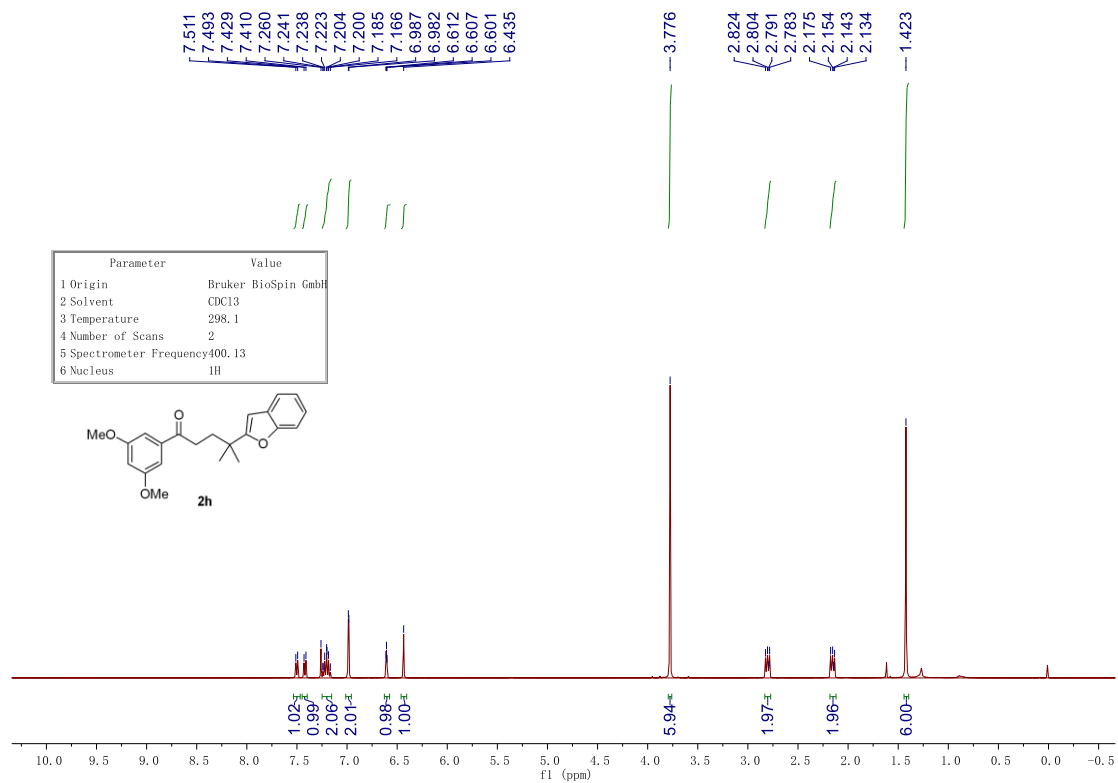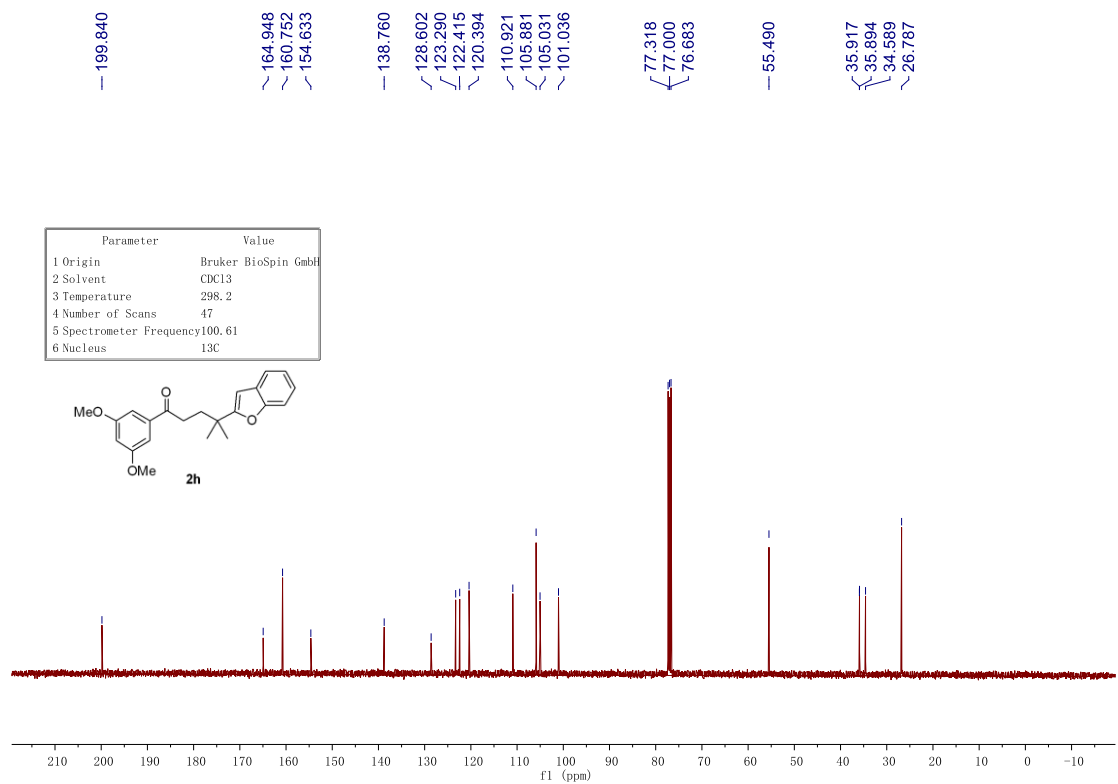

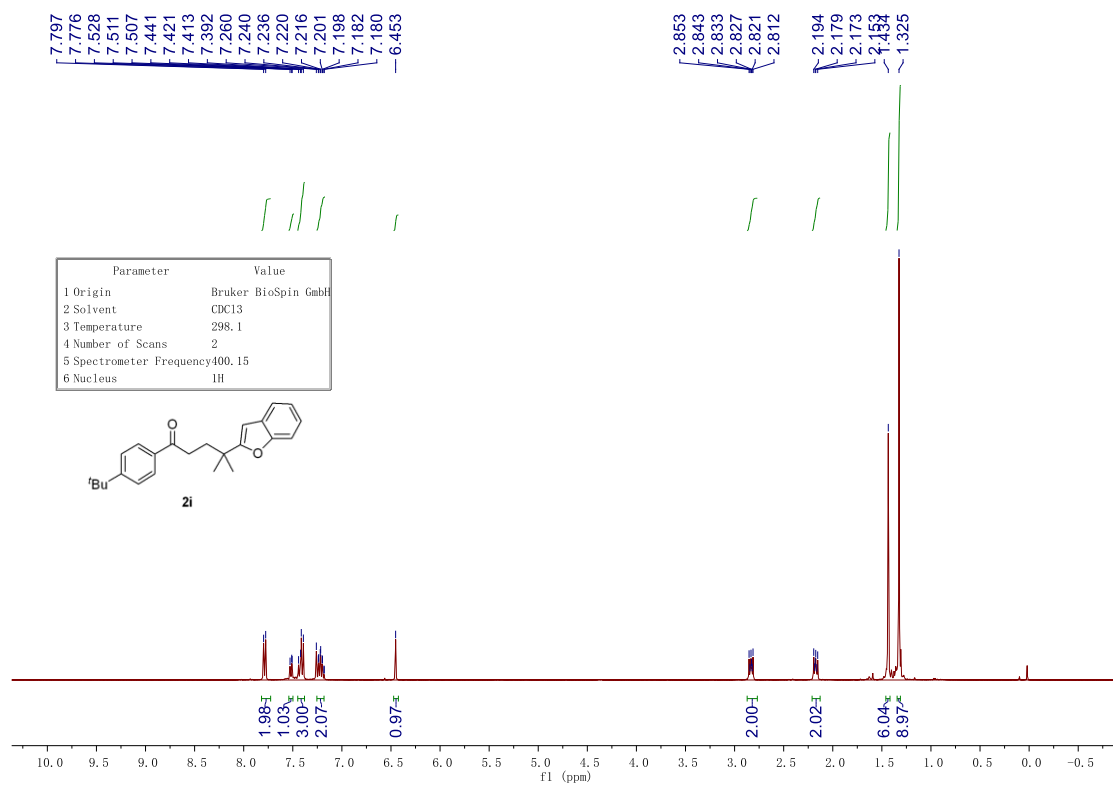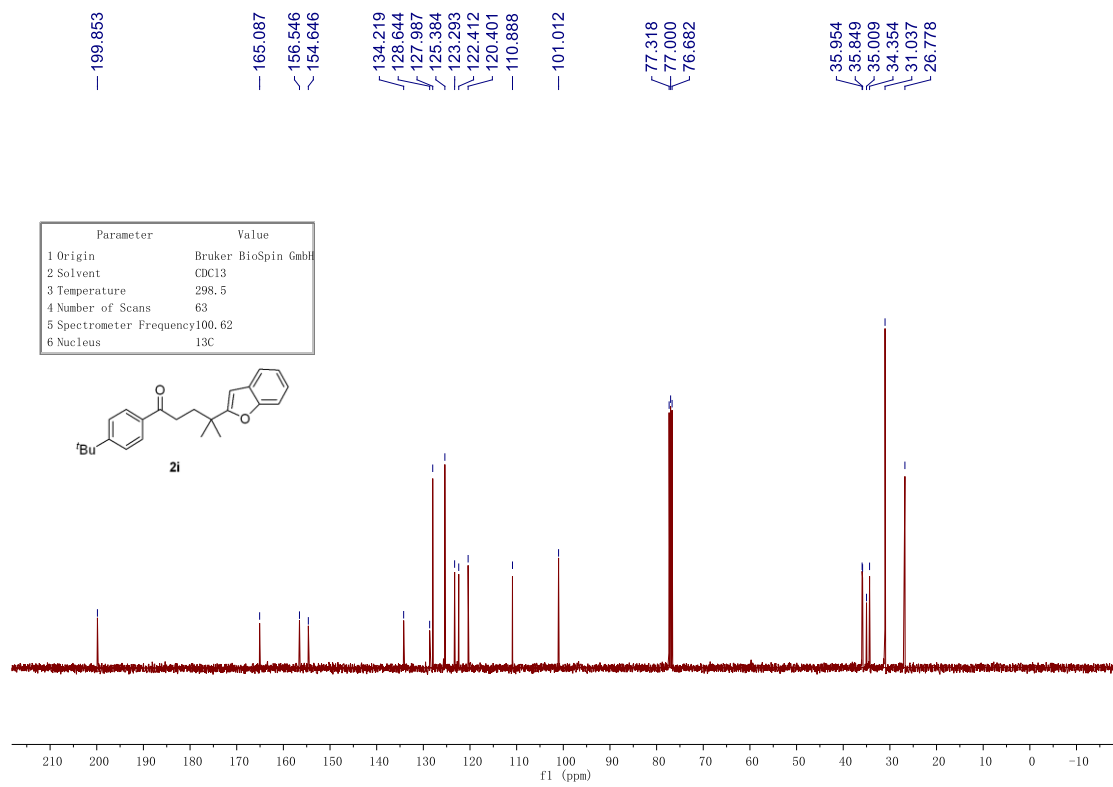

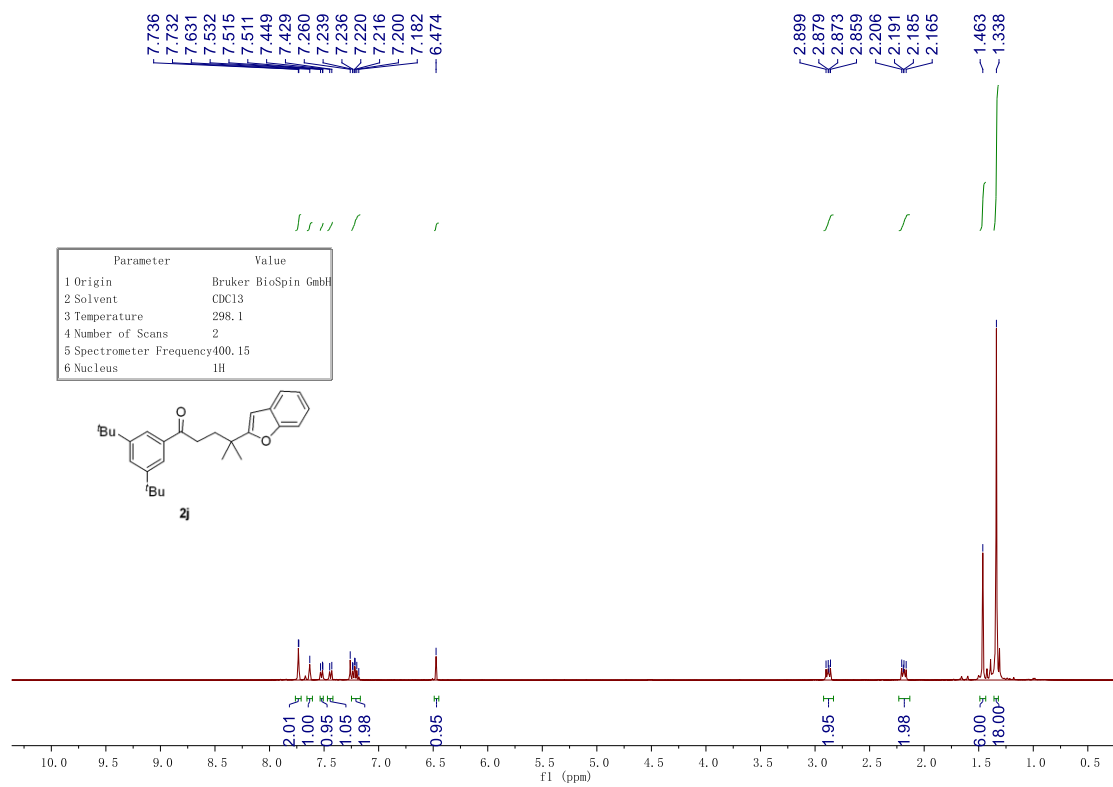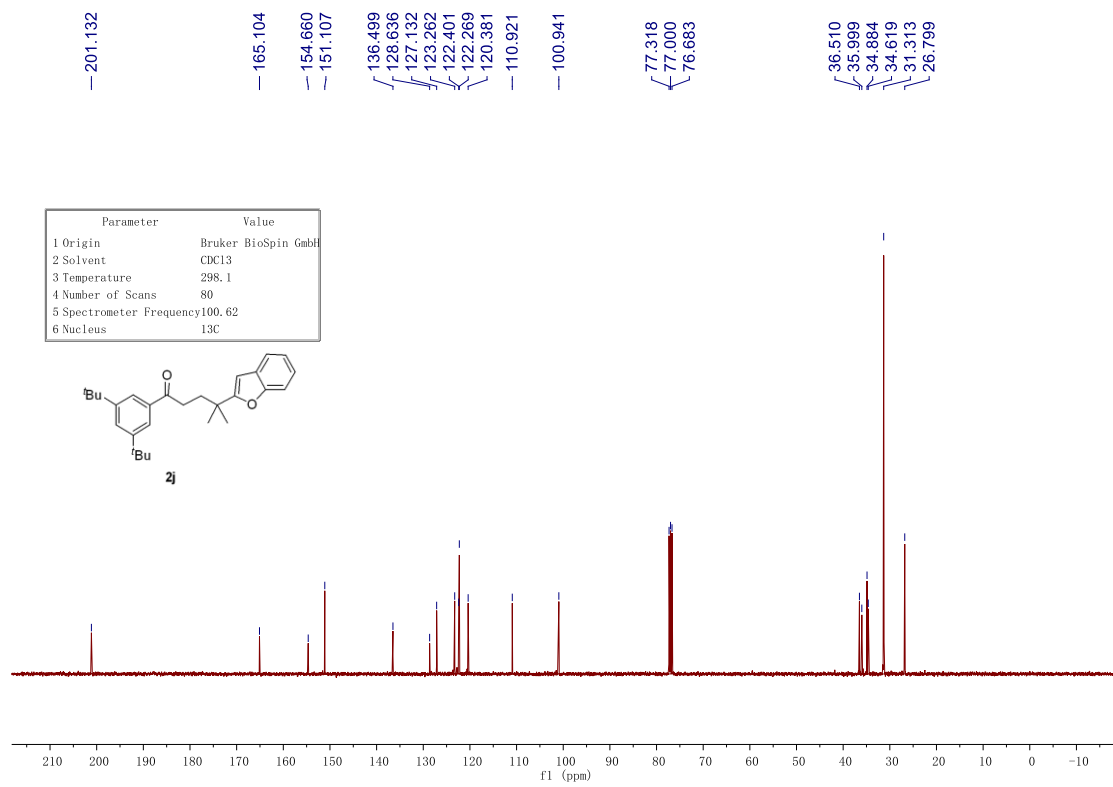

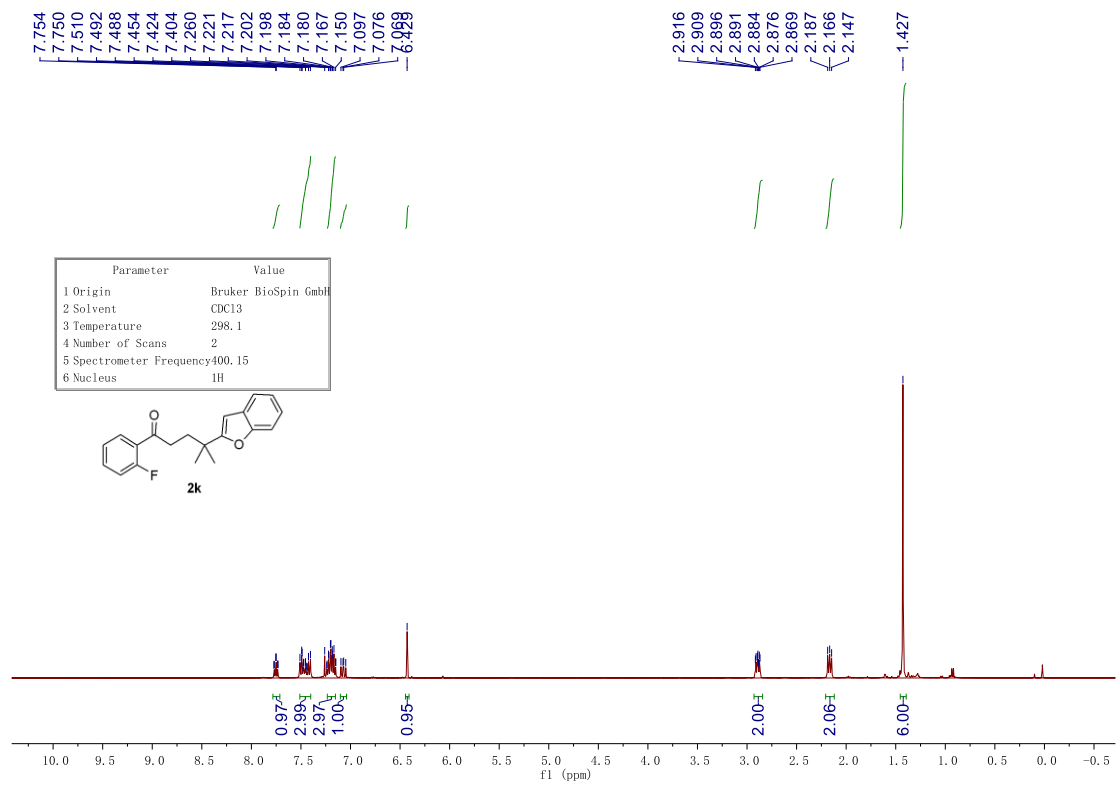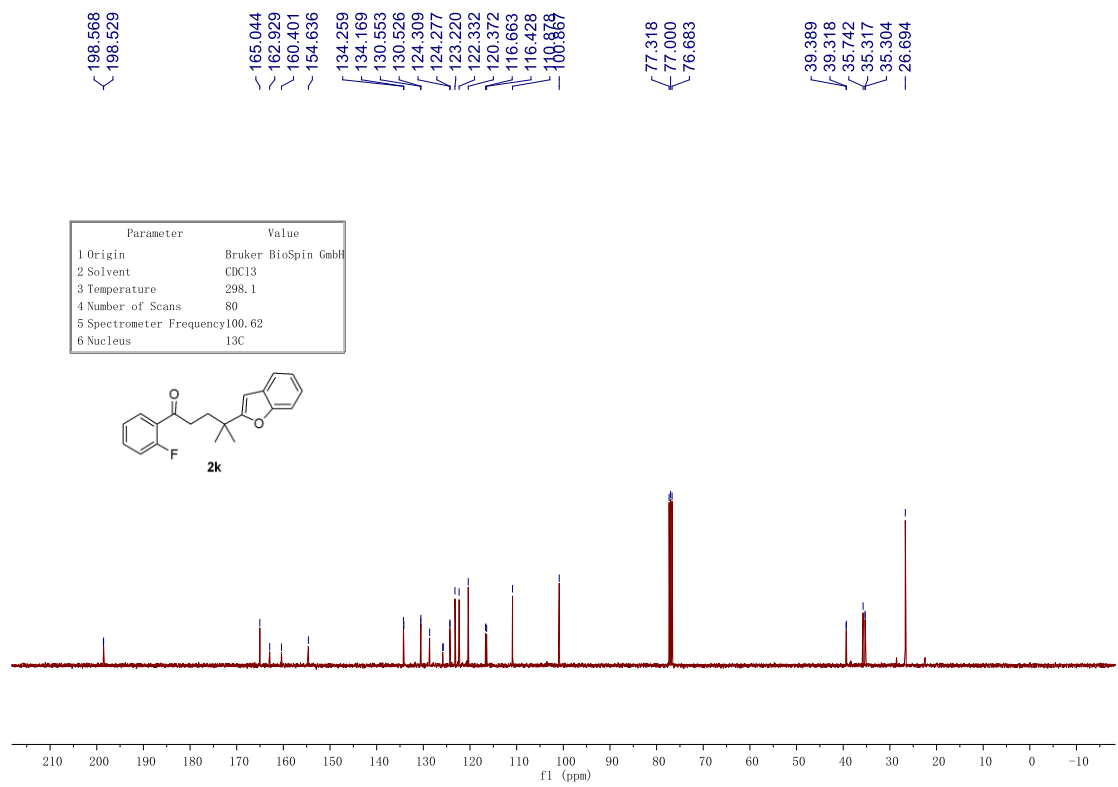

-109.571

| Parameter                | Value               |
|--------------------------|---------------------|
| 1 Origin                 | Bruker BioSpin GmbH |
| 2 Solvent                | CDCl3               |
| 3 Temperature            | 295.7               |
| 4 Number of Scans        | 2                   |
| 5 Spectrometer Frequency | 376.52              |
| 6 Nucleus                | 19F                 |

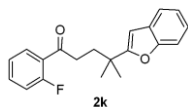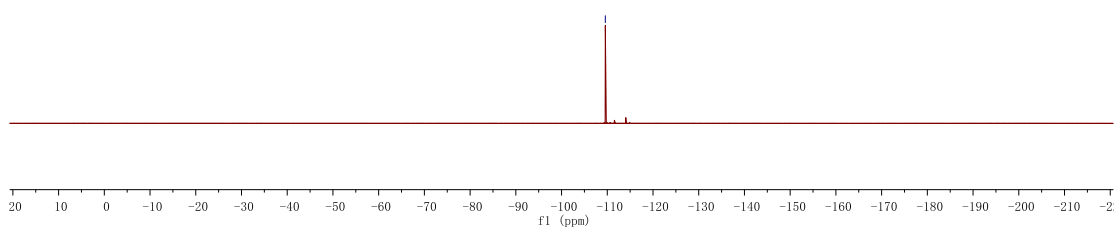

7.607  
7.588  
7.552  
7.534  
7.528  
7.523  
7.504  
7.501  
7.439  
7.419  
7.365  
7.351  
7.260  
7.237  
7.234  
7.216  
7.214  
7.197  
6.185

2.836  
2.827  
2.816  
2.811  
2.804  
2.796  
2.188  
2.180  
2.173  
2.168  
1.430

| Parameter                | Value               |
|--------------------------|---------------------|
| 1 Origin                 | Bruker BioSpin GmbH |
| 2 Solvent                | CDCl3               |
| 3 Temperature            | 298.4               |
| 4 Number of Scans        | 2                   |
| 5 Spectrometer Frequency | 400.15              |
| 6 Nucleus                | 1H                  |

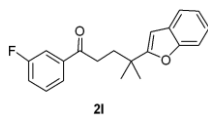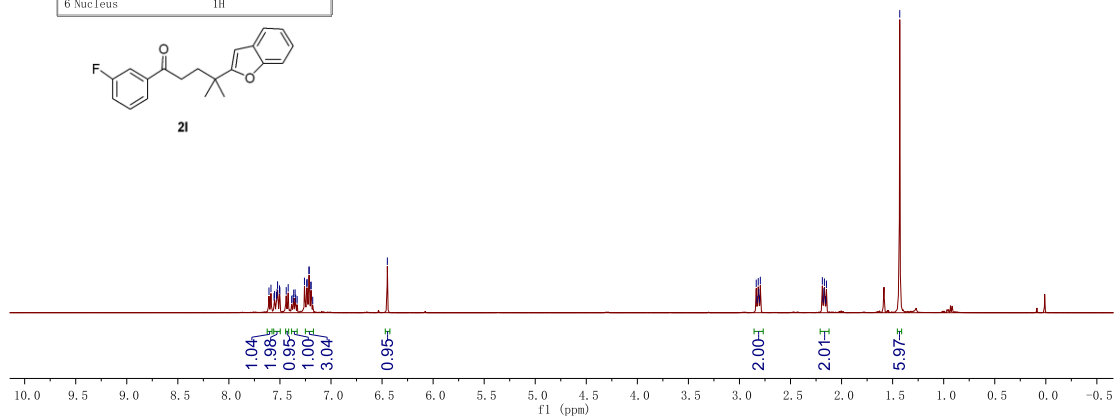

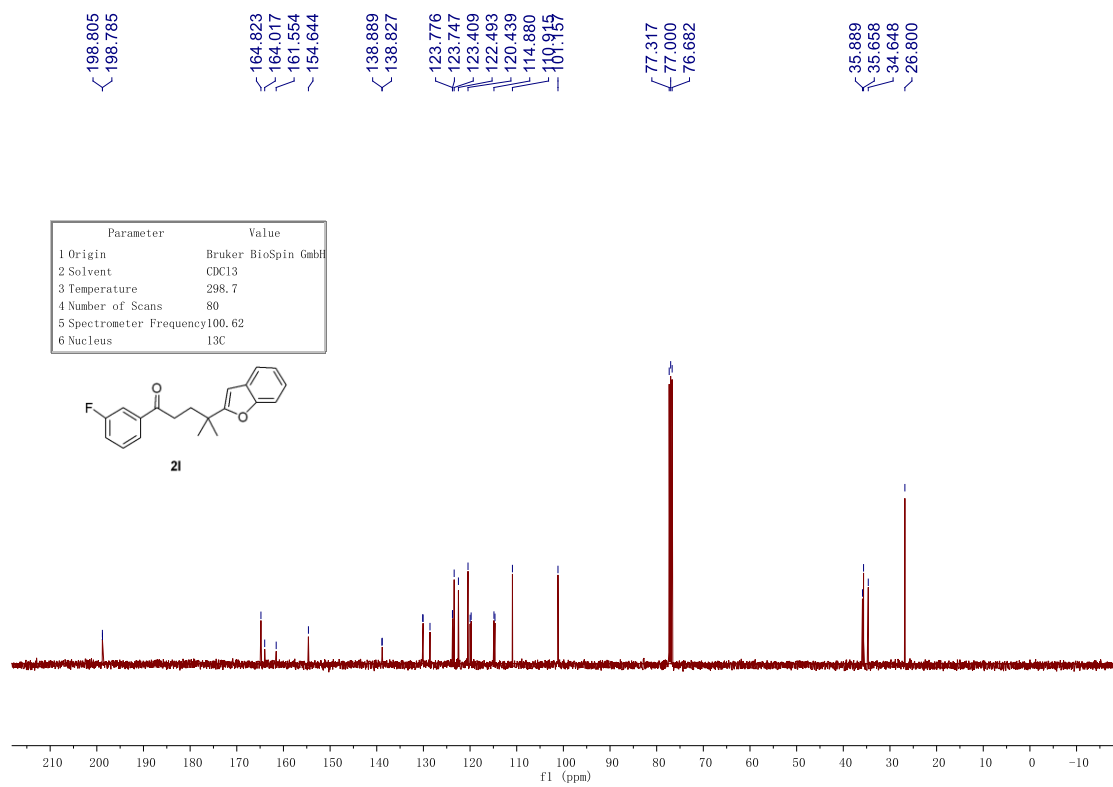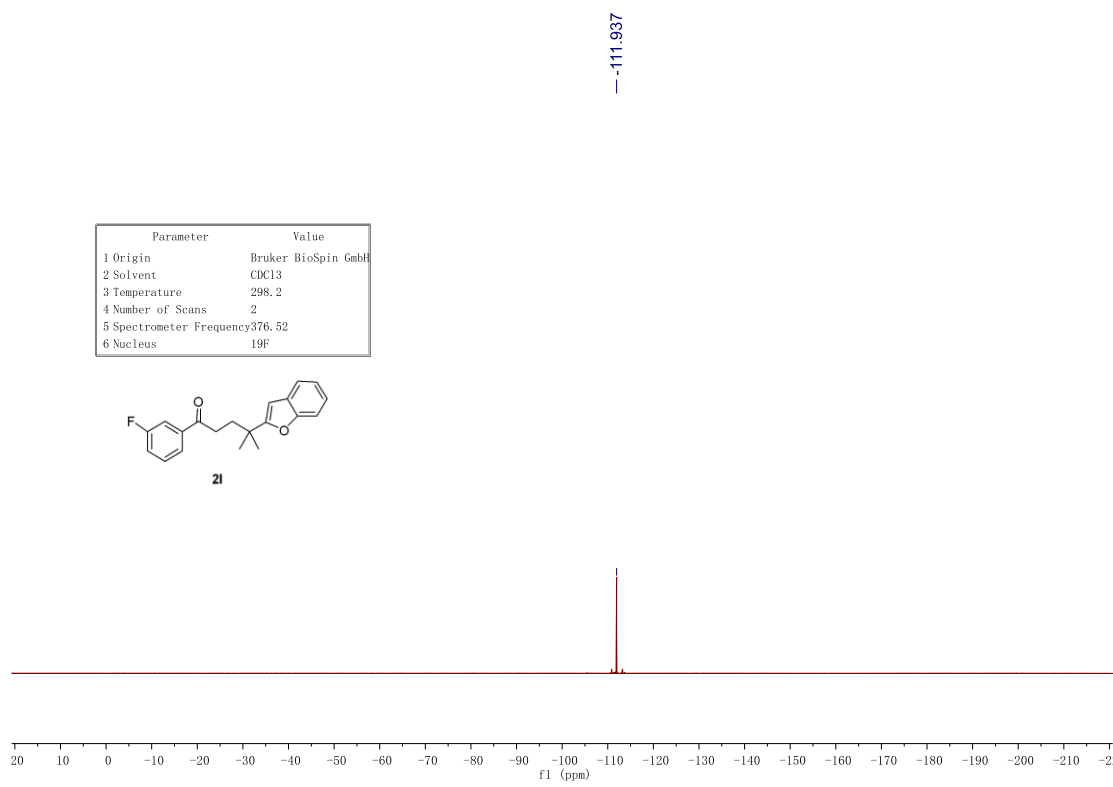

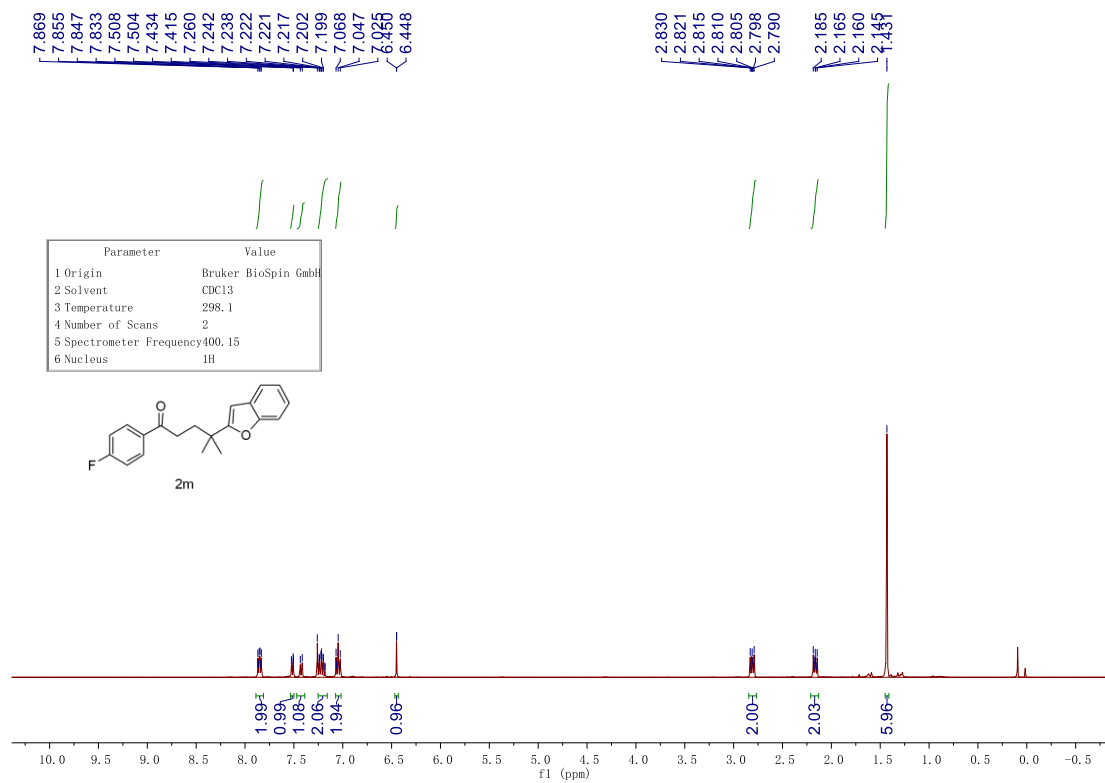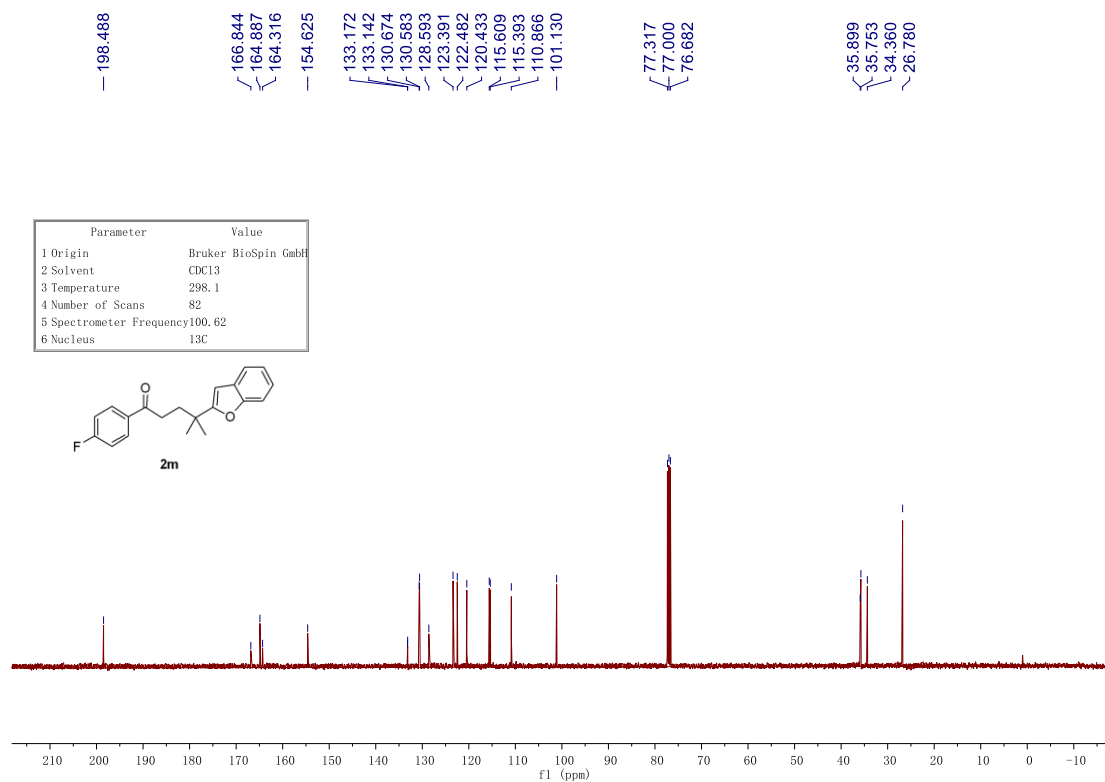



-105.589

| Parameter                | Value               |
|--------------------------|---------------------|
| 1 Origin                 | Bruker Biospin GmbH |
| 2 Solvent                | CDCl3               |
| 3 Temperature            | 298.2               |
| 4 Number of Scans        | 2                   |
| 5 Spectrometer Frequency | 376.52              |
| 6 Nucleus                | 19F                 |

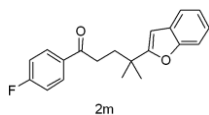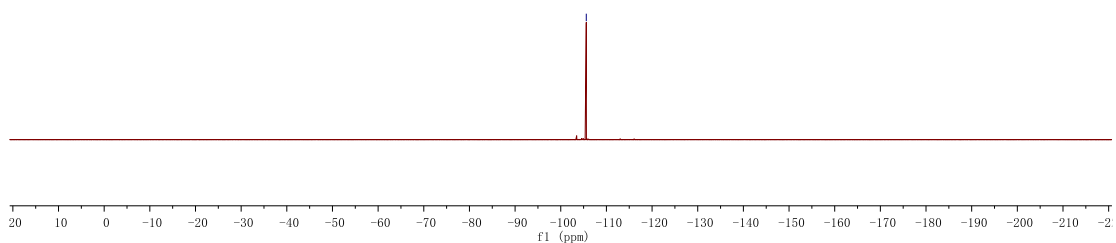

7.770  
7.748  
7.523  
7.506  
7.434  
7.414  
7.360  
7.339  
7.260  
7.242  
7.220  
7.202  
7.184  
6.446

2.823  
2.803  
2.791  
2.783  
2.179  
2.170  
2.158  
2.139  
1.427

| Parameter                | Value               |
|--------------------------|---------------------|
| 1 Origin                 | Bruker Biospin GmbH |
| 2 Solvent                | CDCl3               |
| 3 Temperature            | 298.1               |
| 4 Number of Scans        | 2                   |
| 5 Spectrometer Frequency | 400.13              |
| 6 Nucleus                | 1H                  |

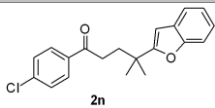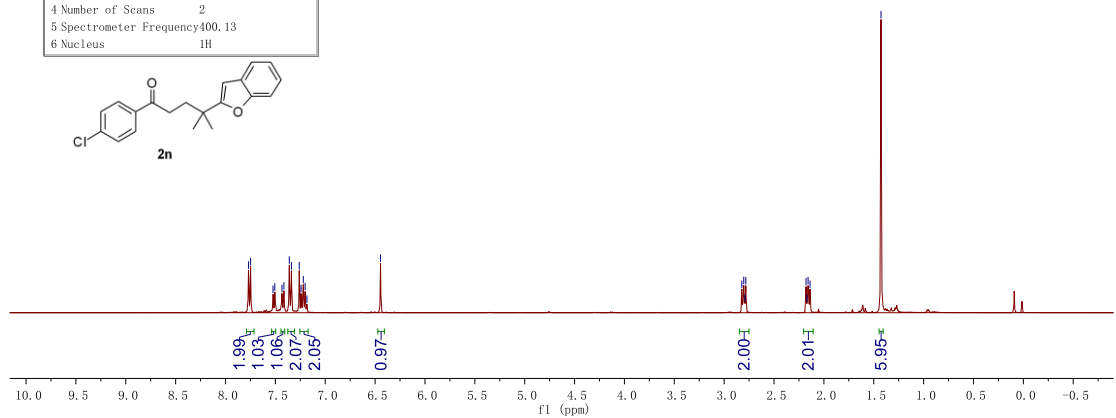

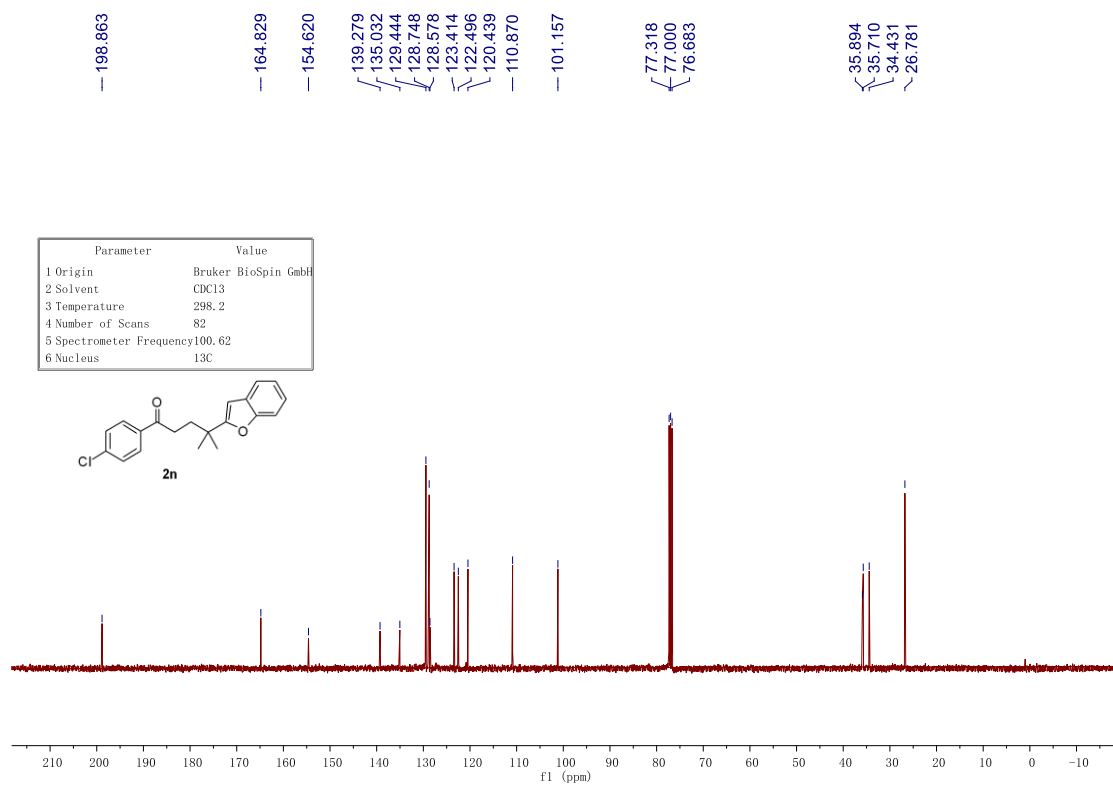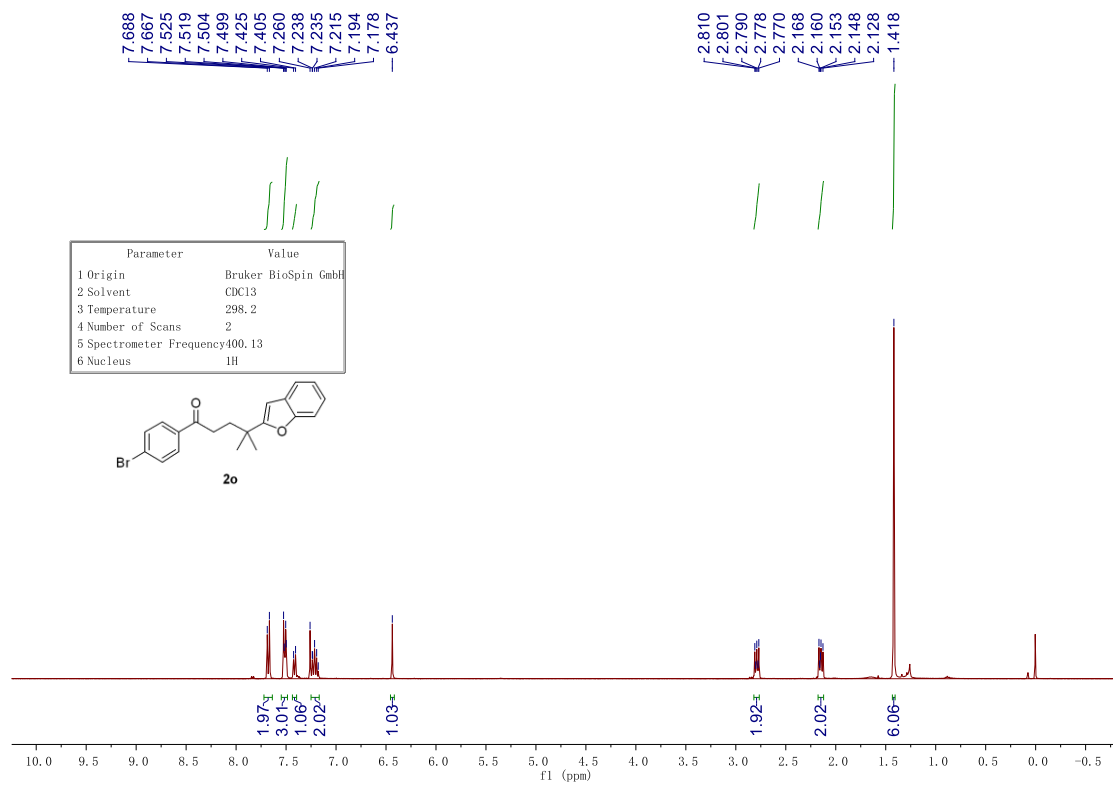

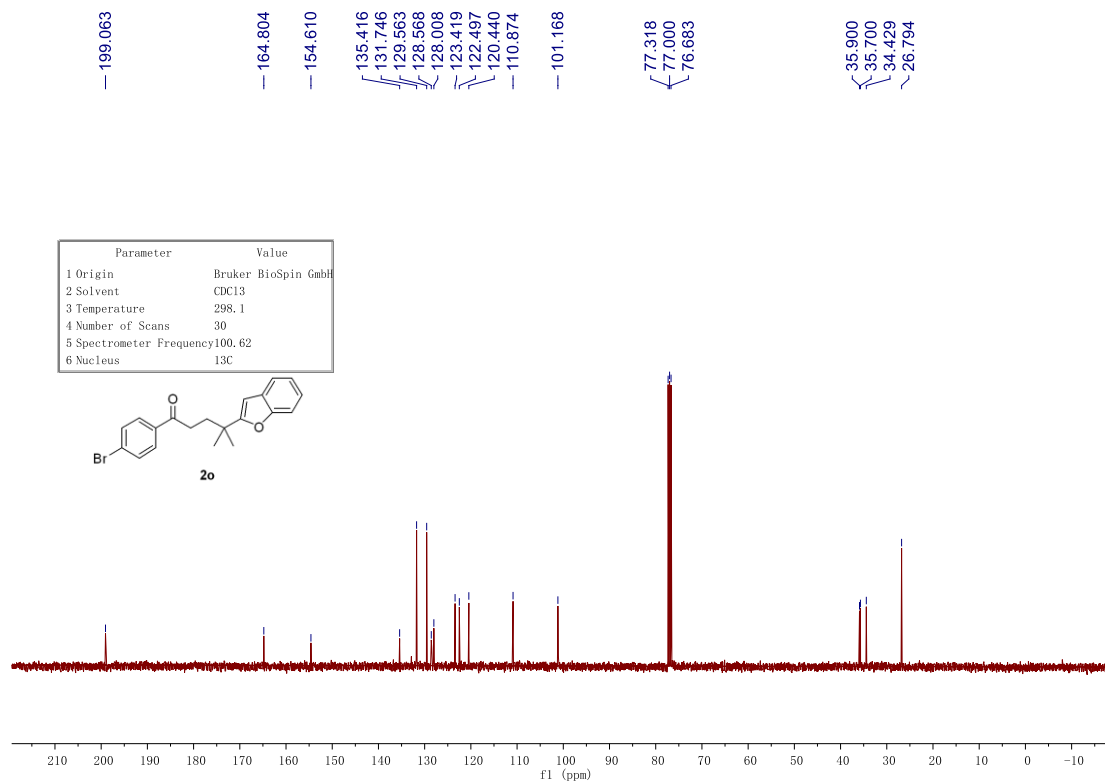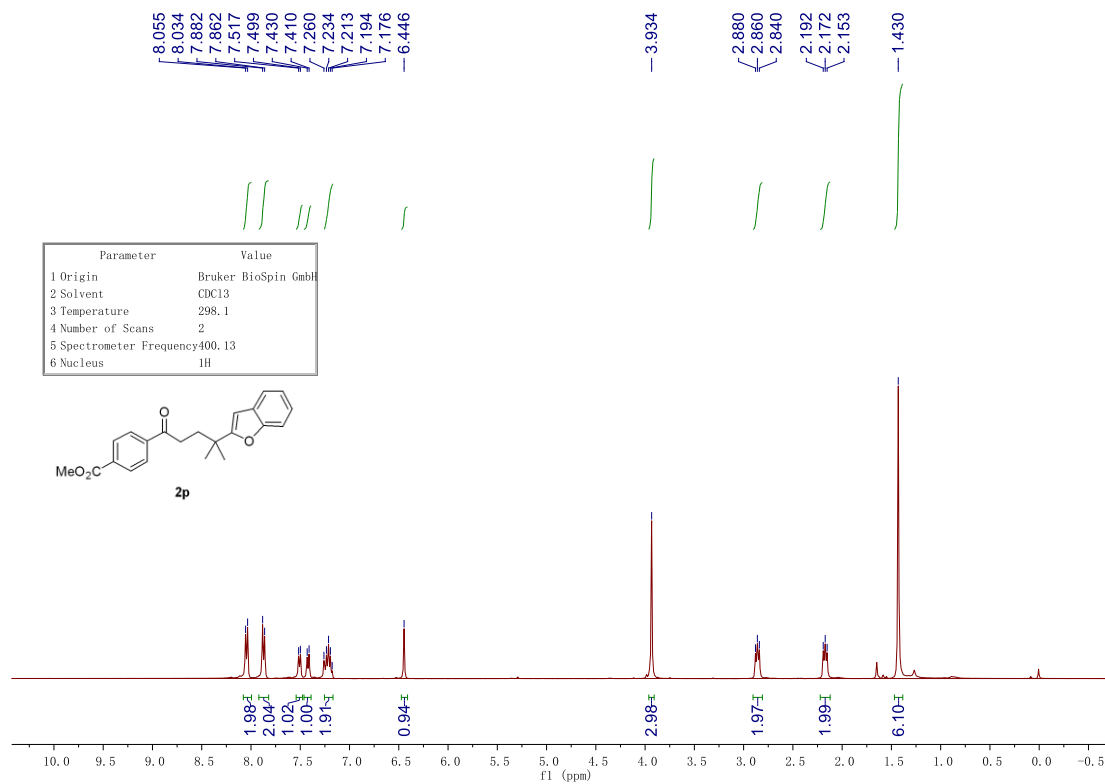

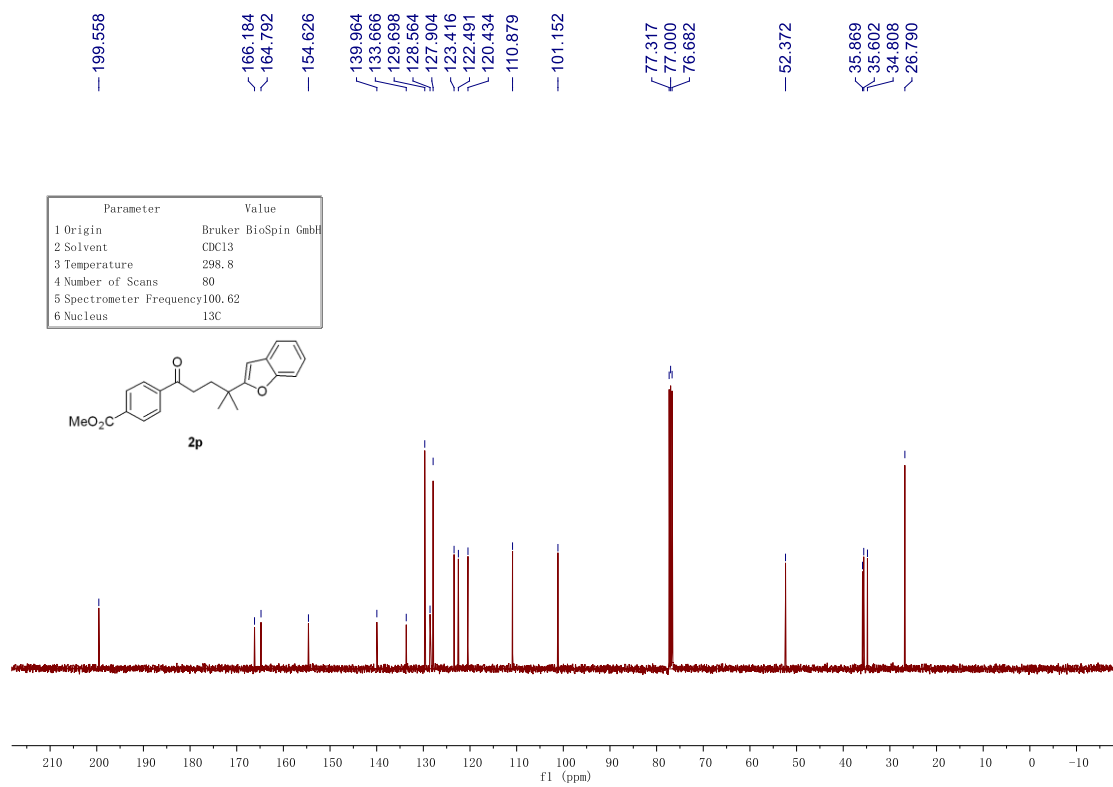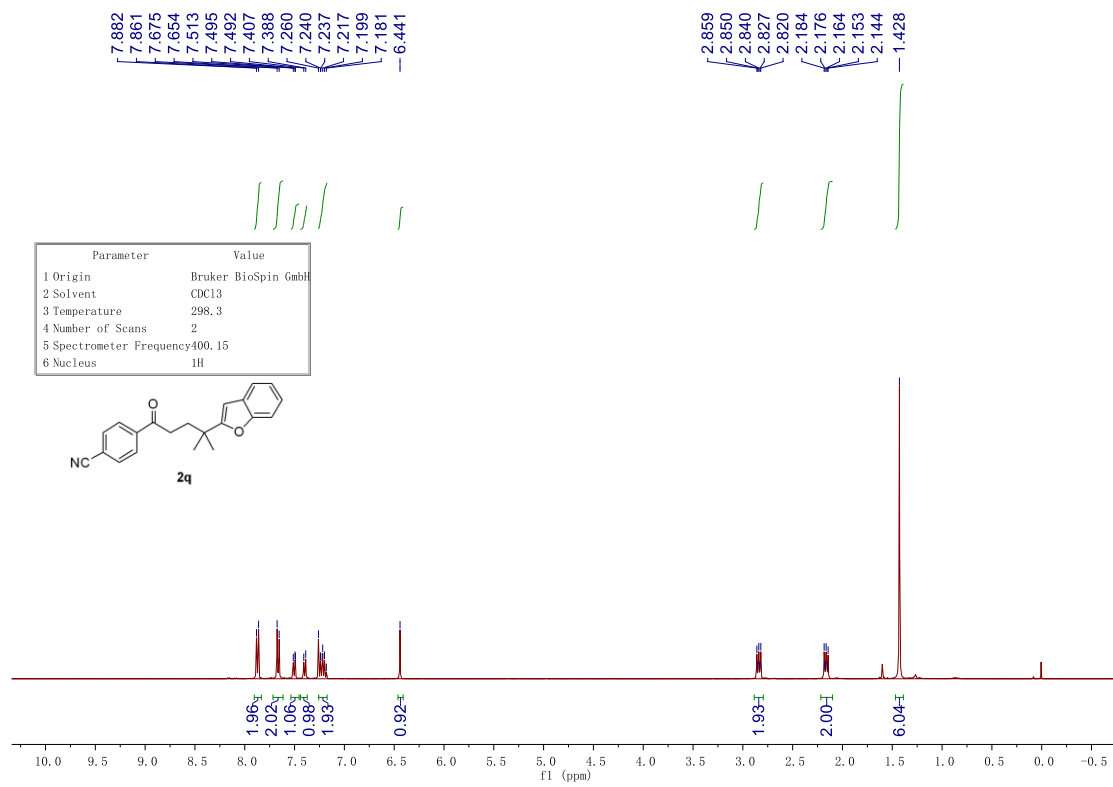

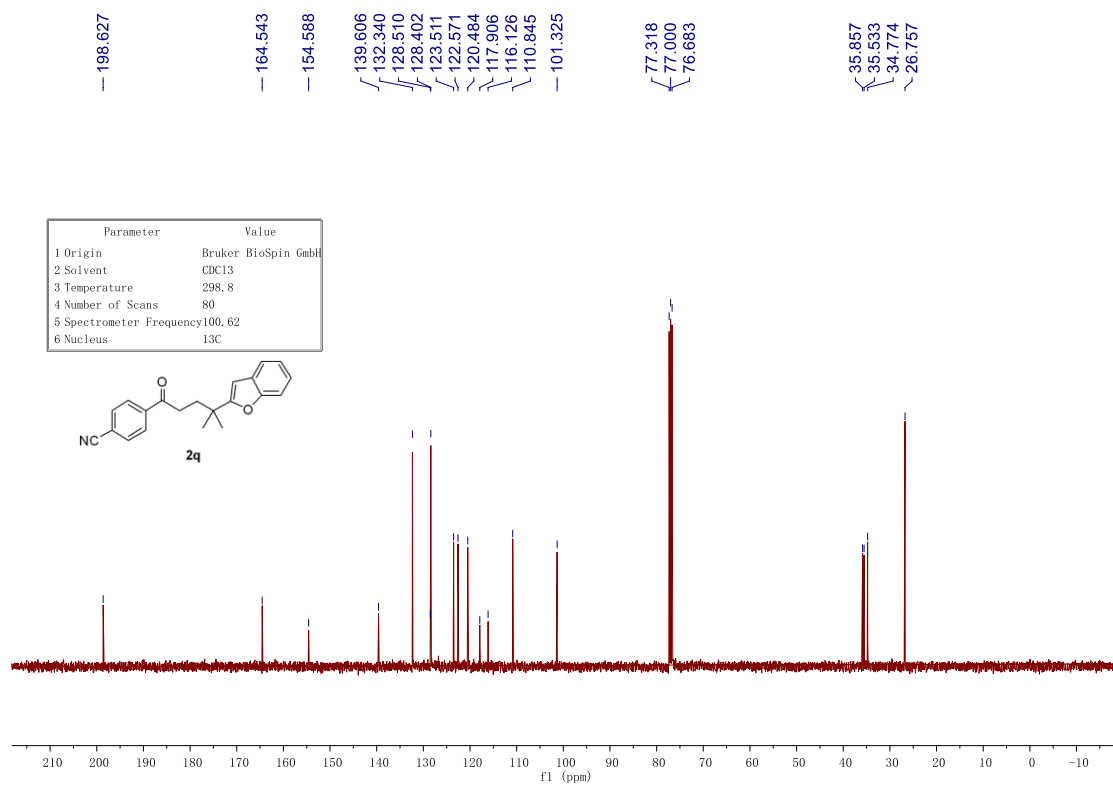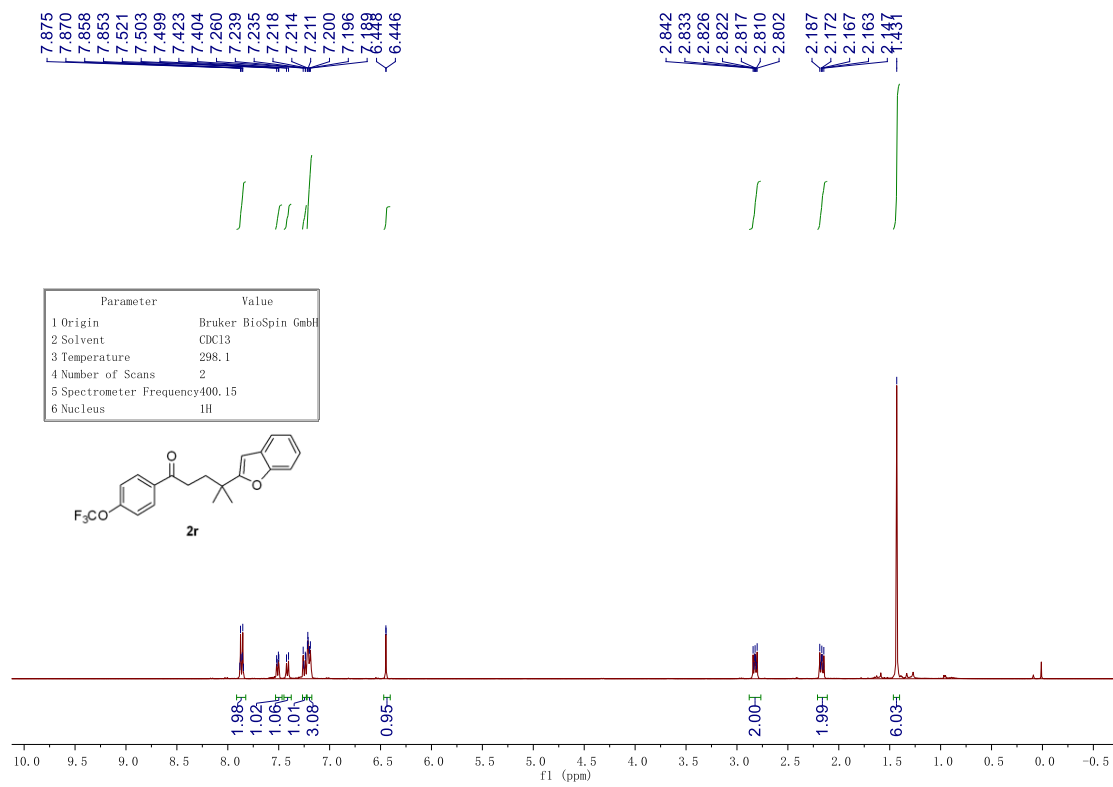

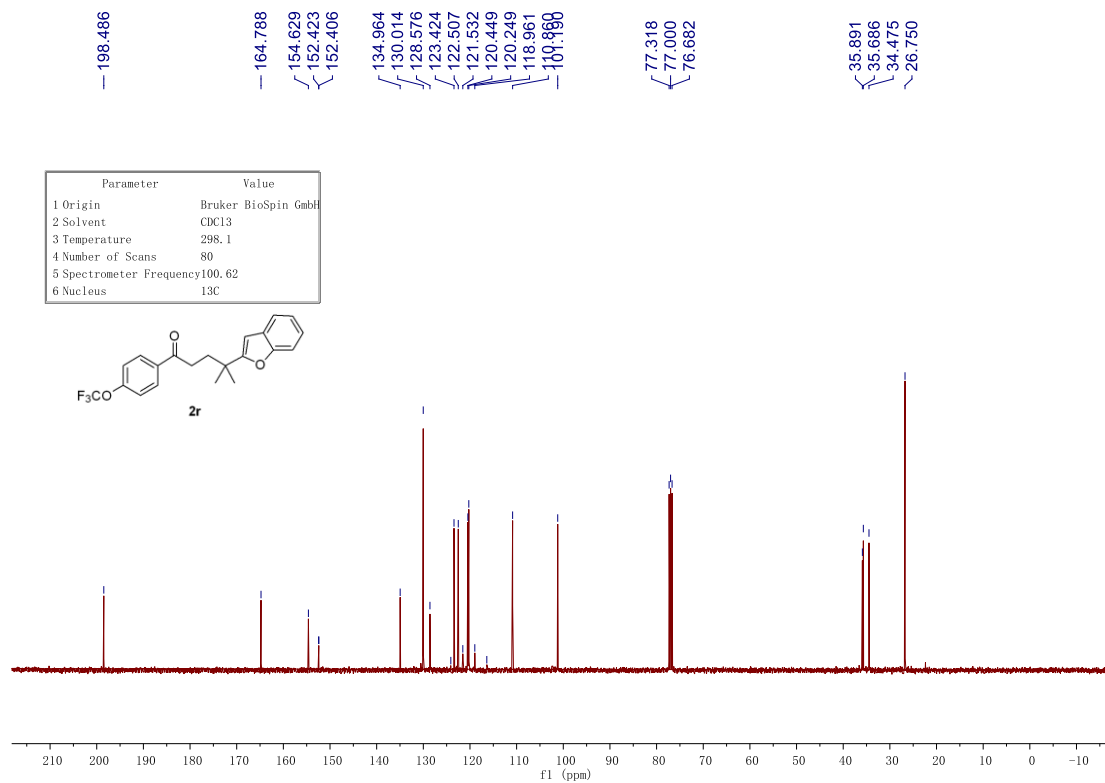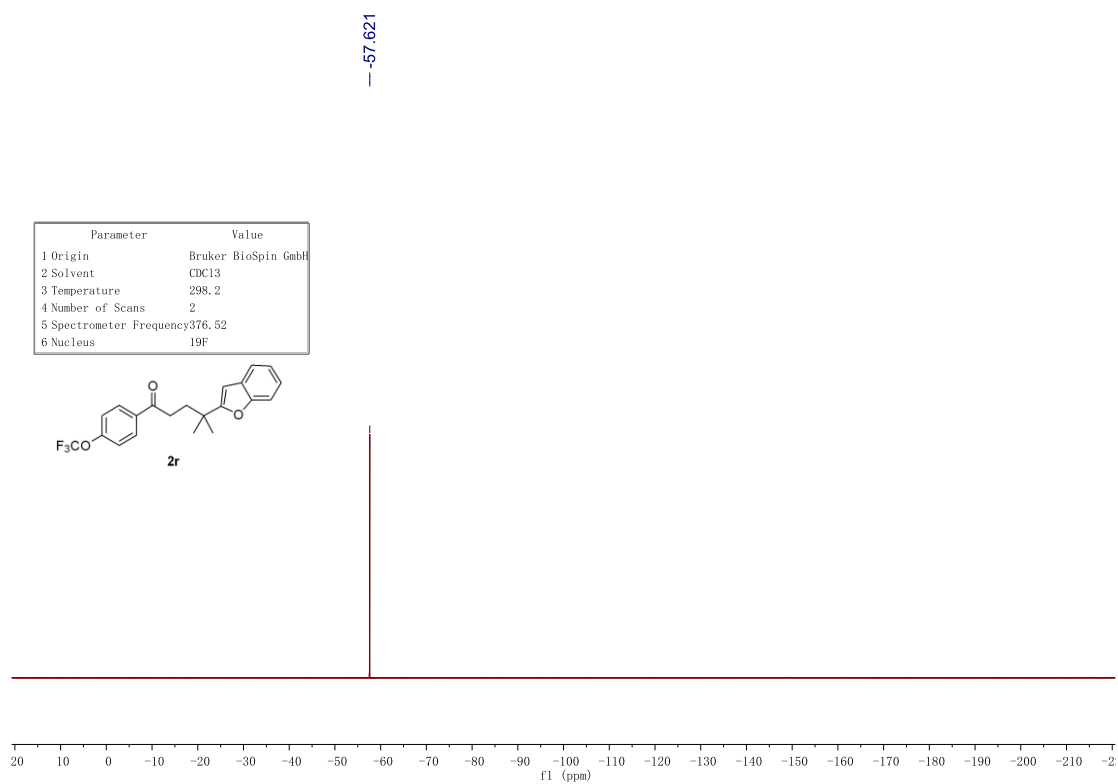

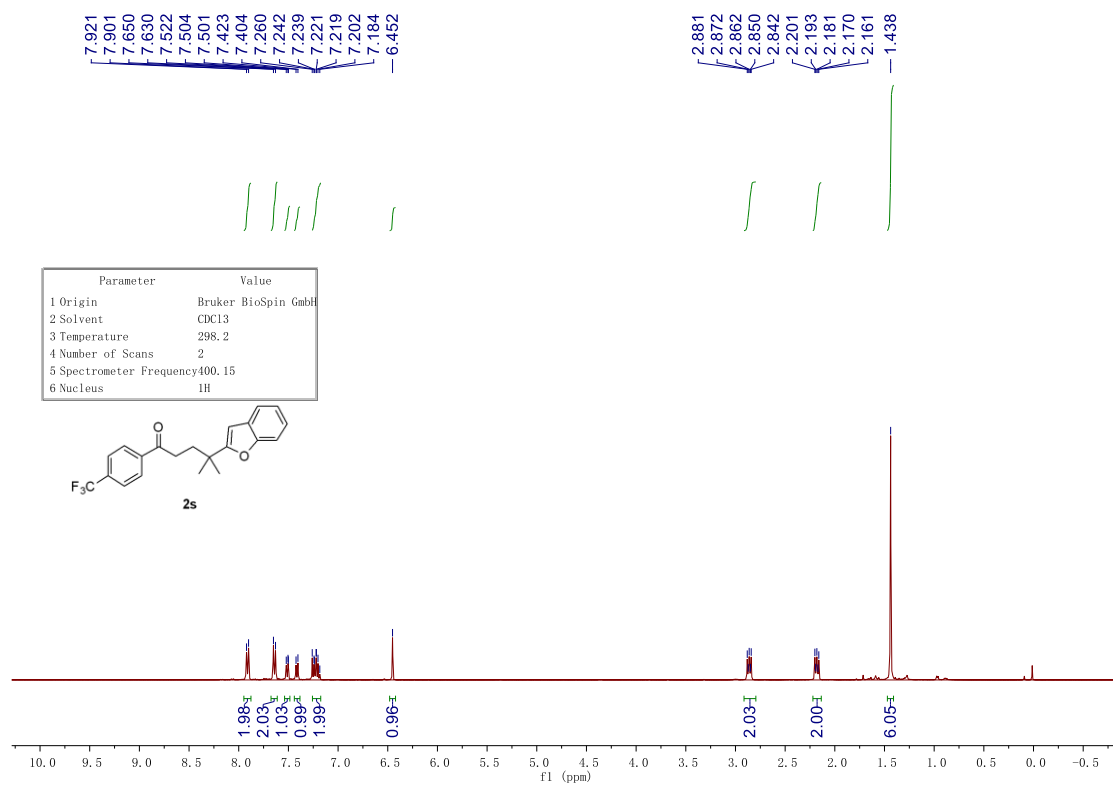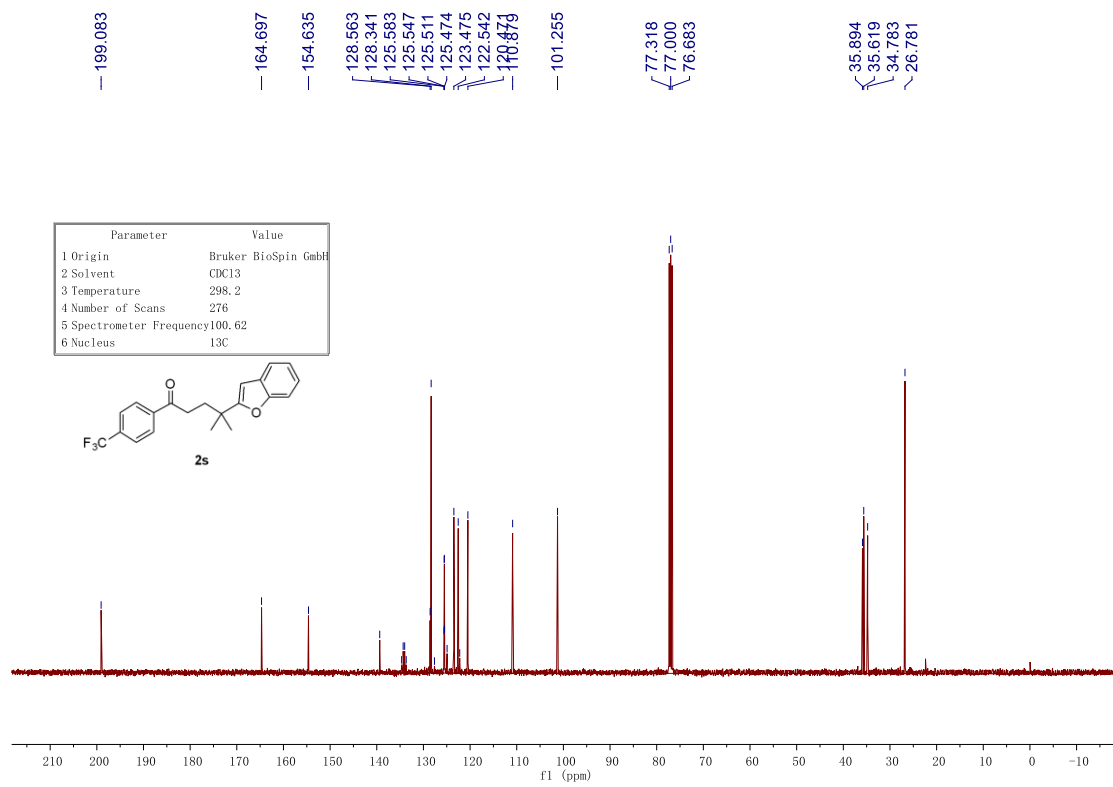

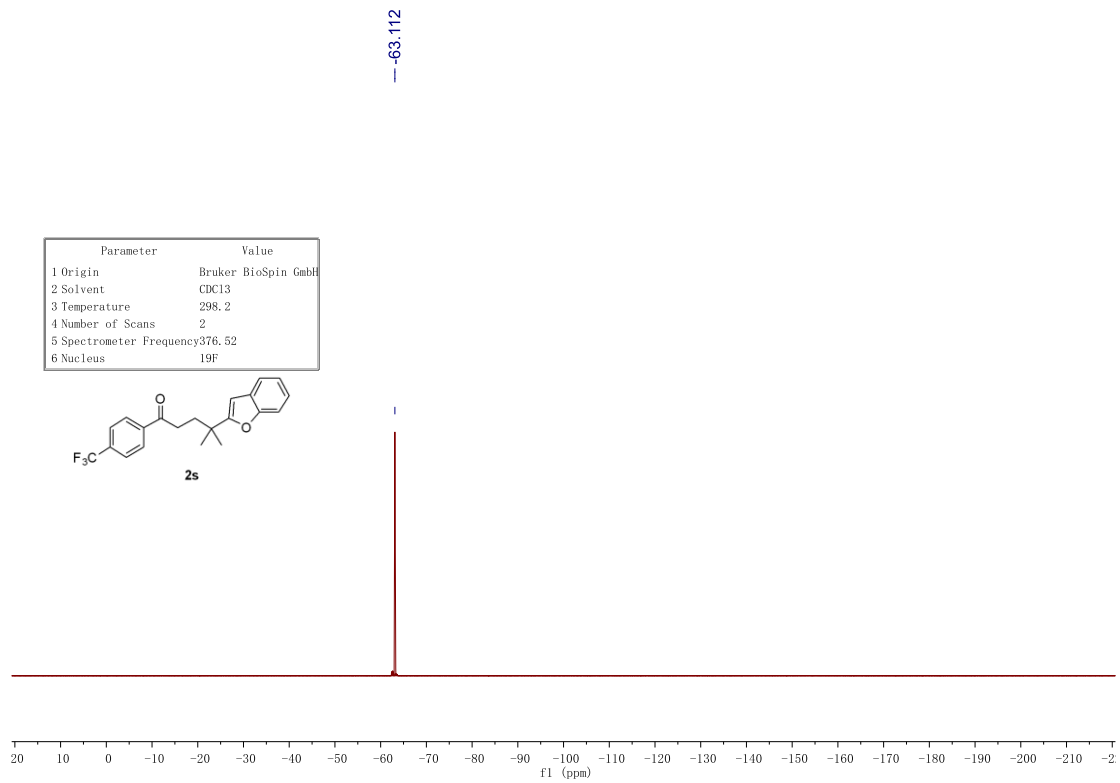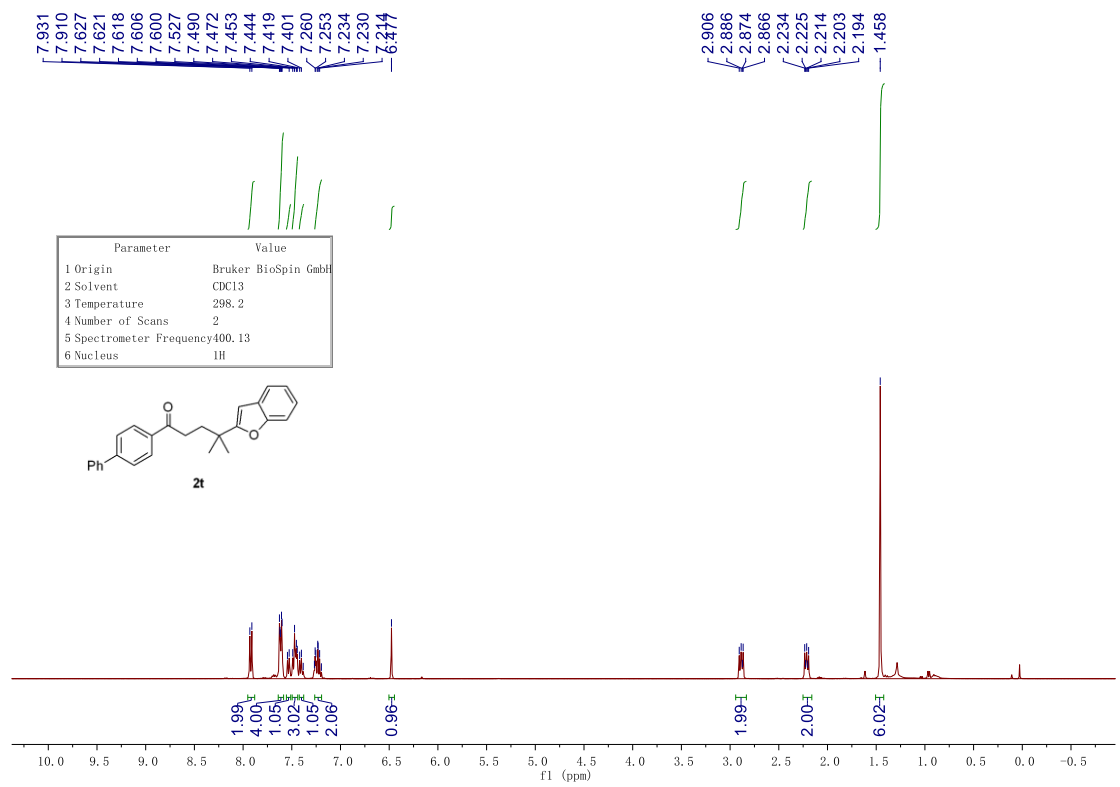



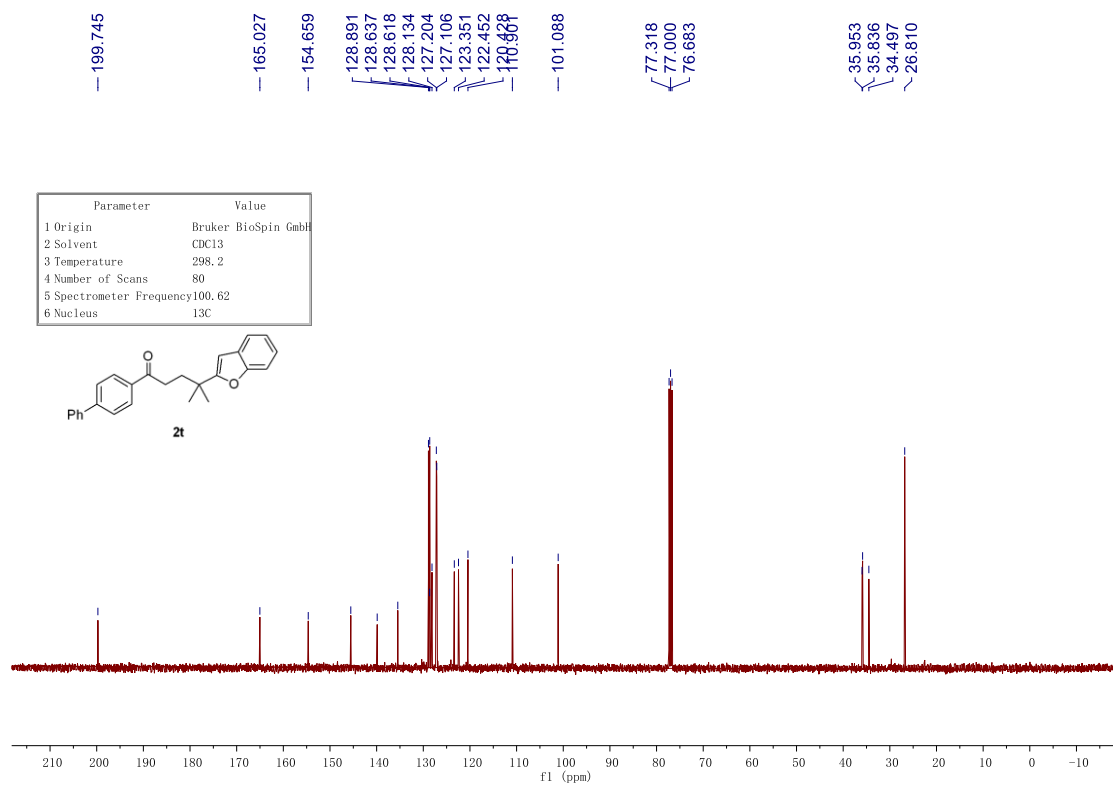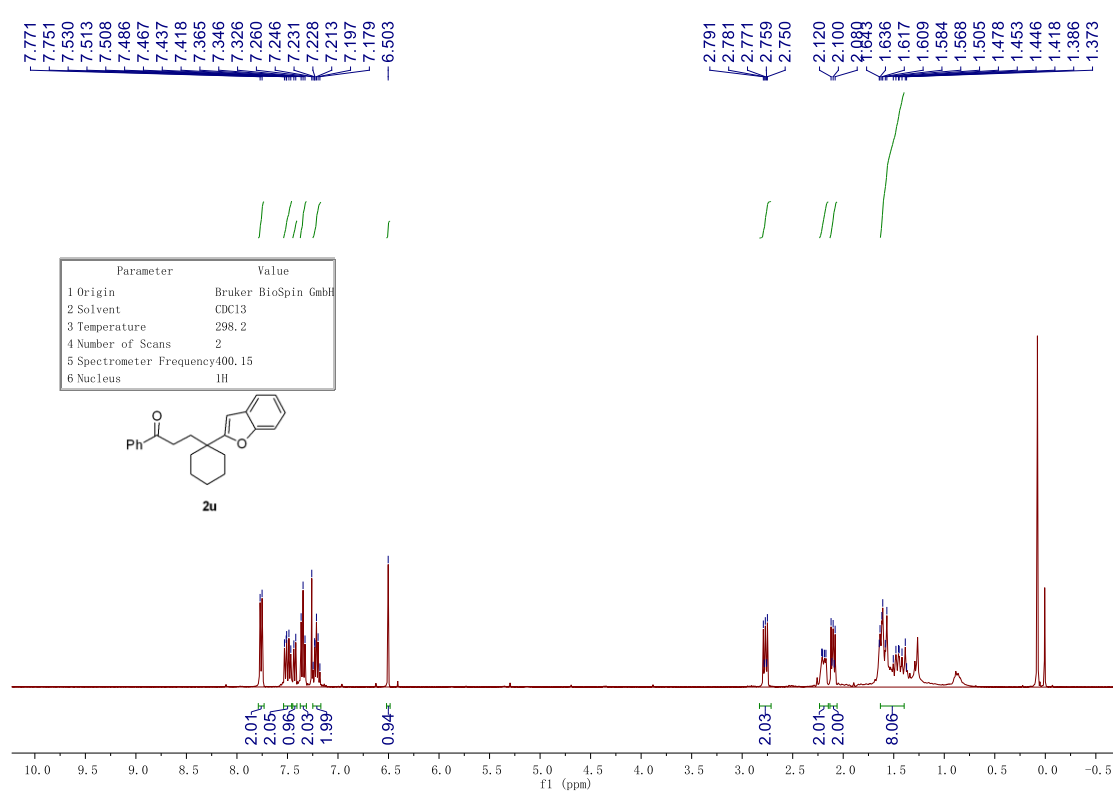

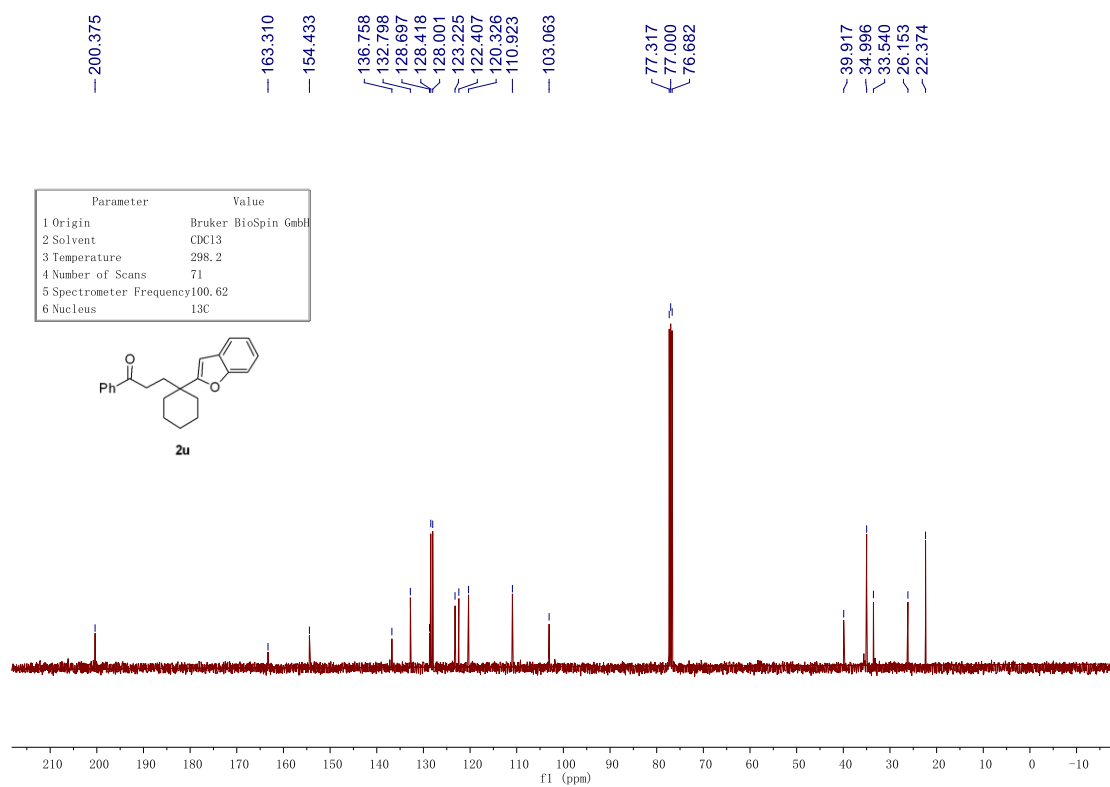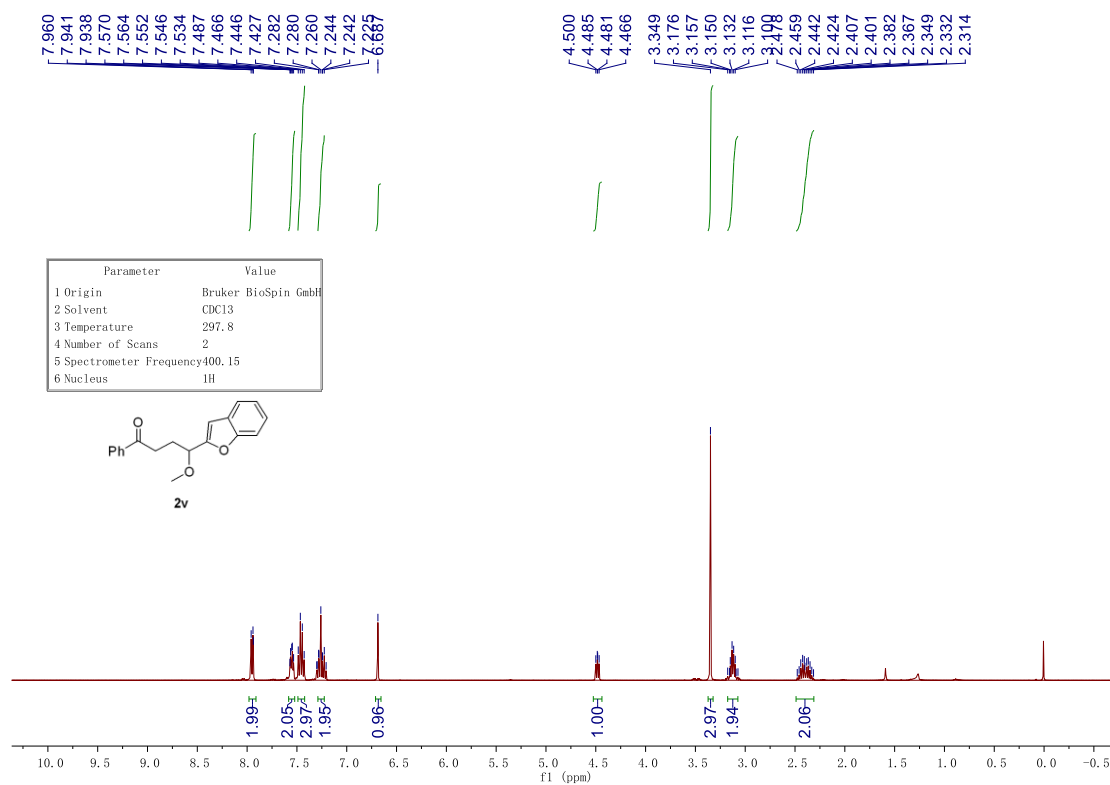

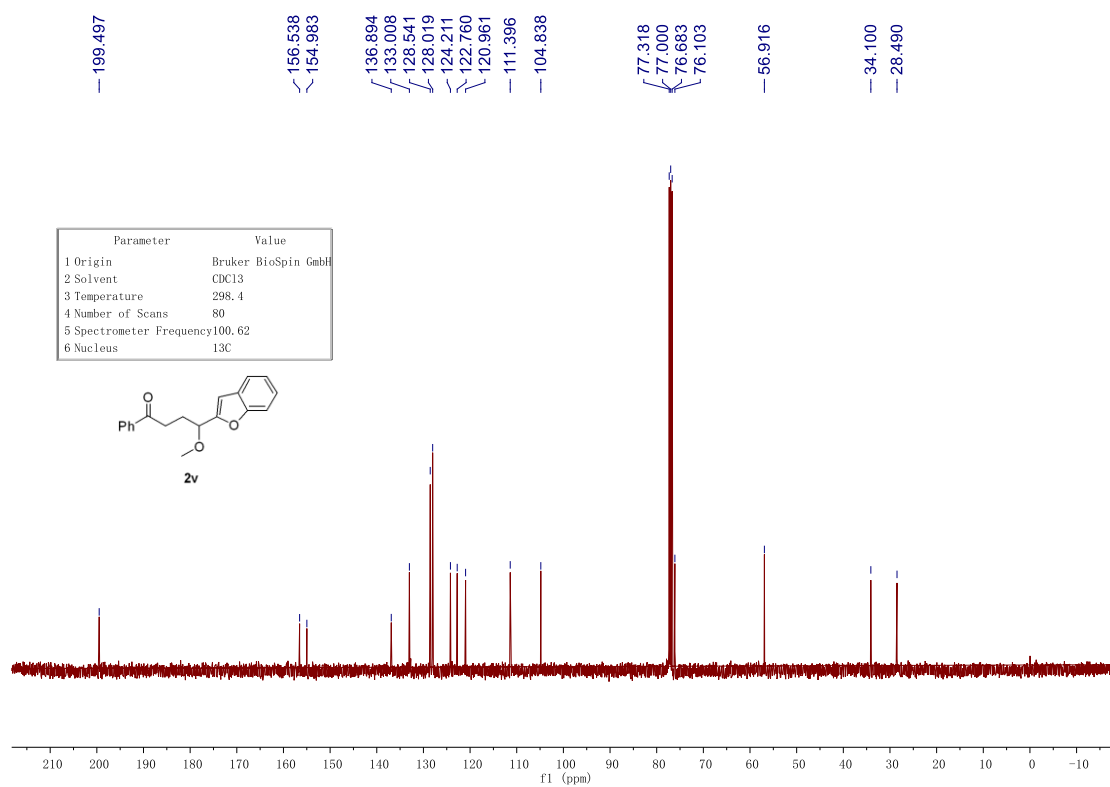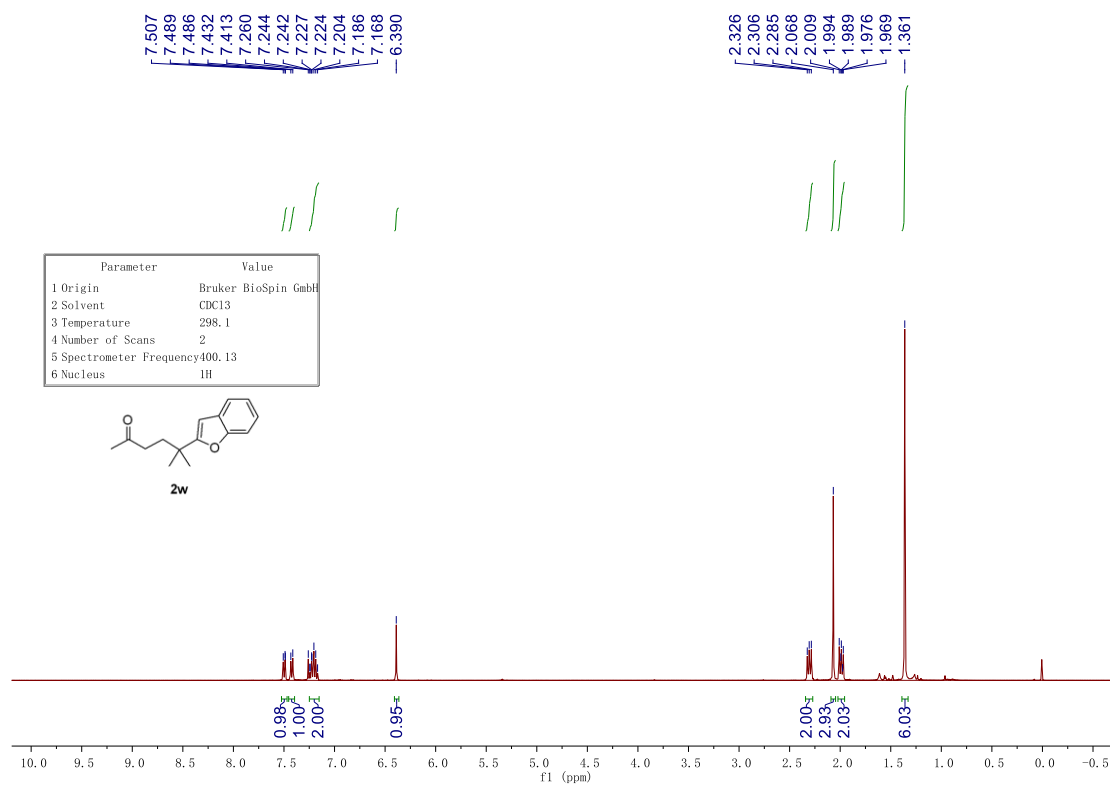

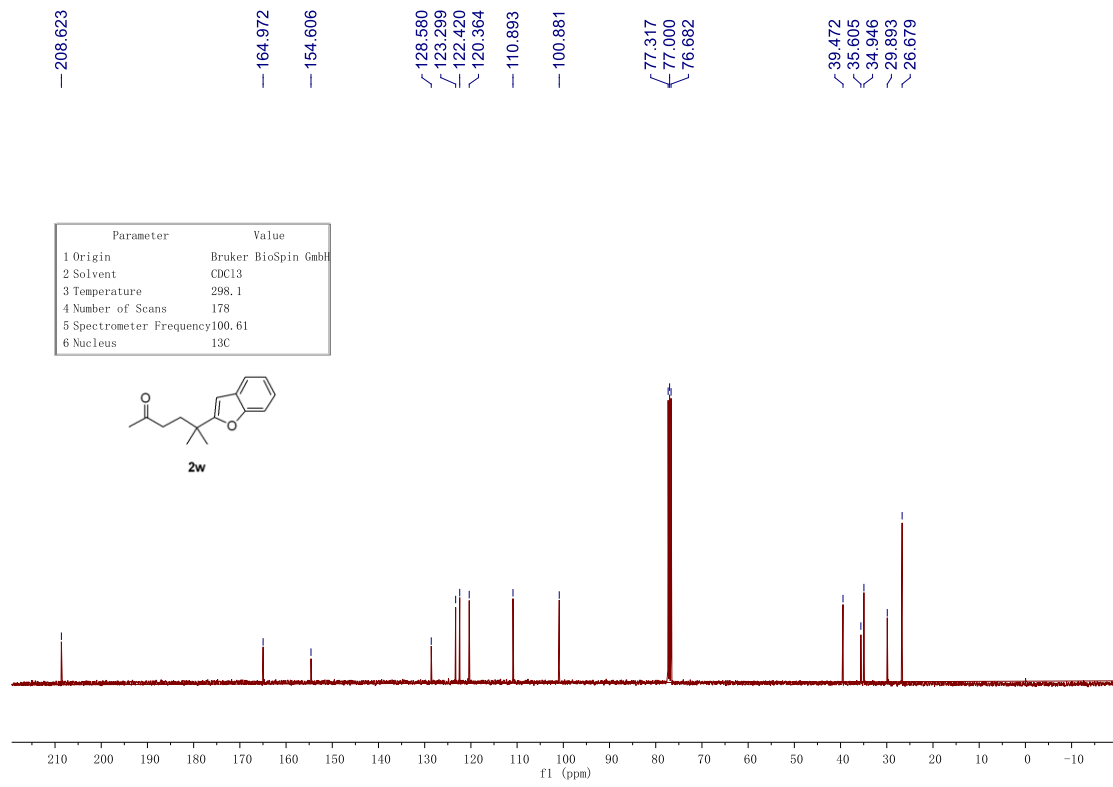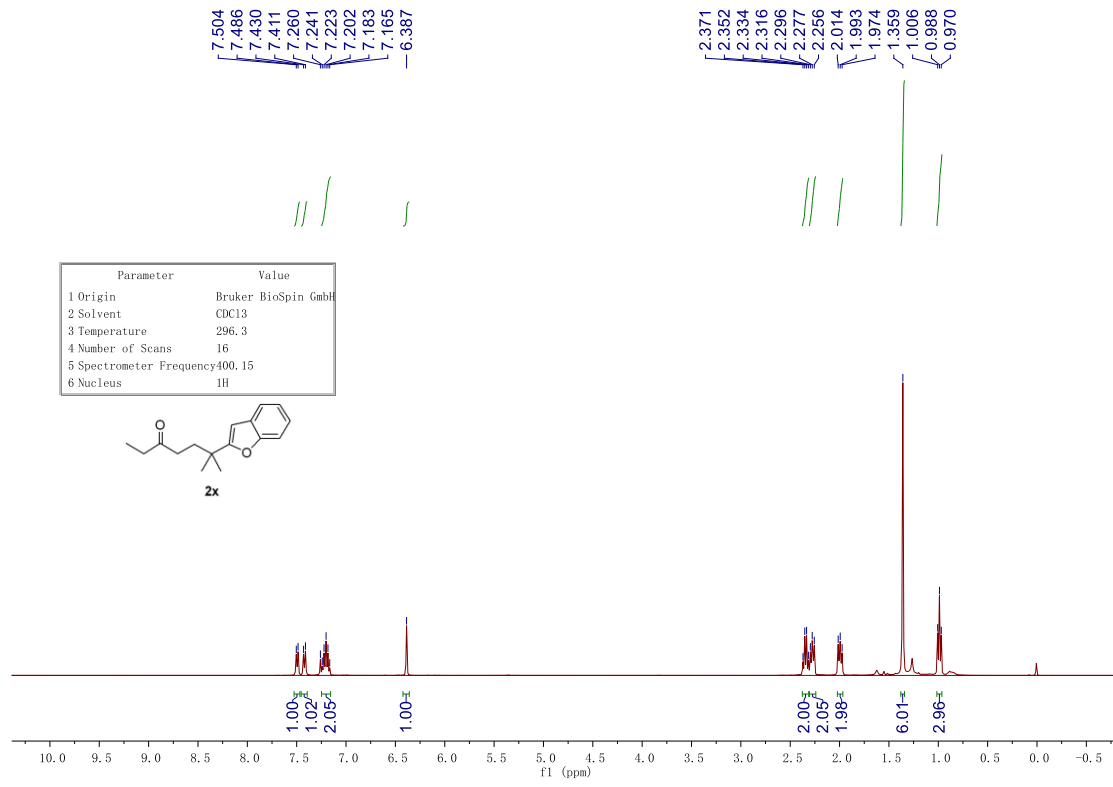

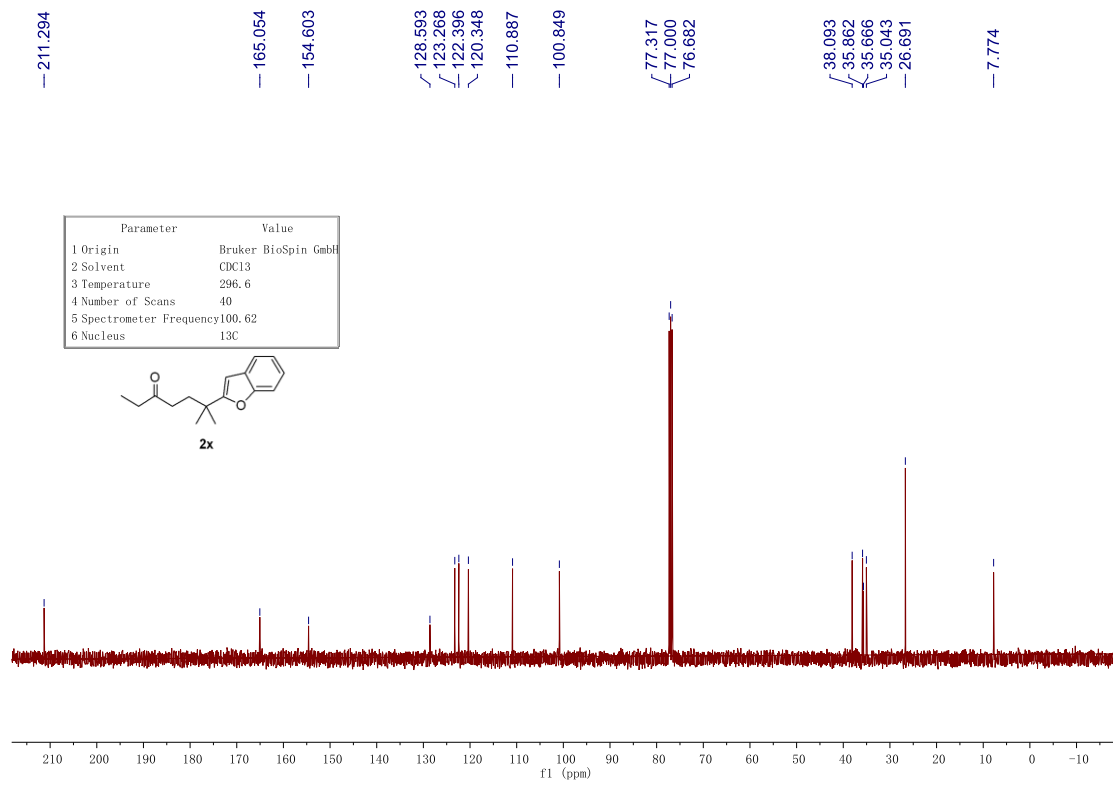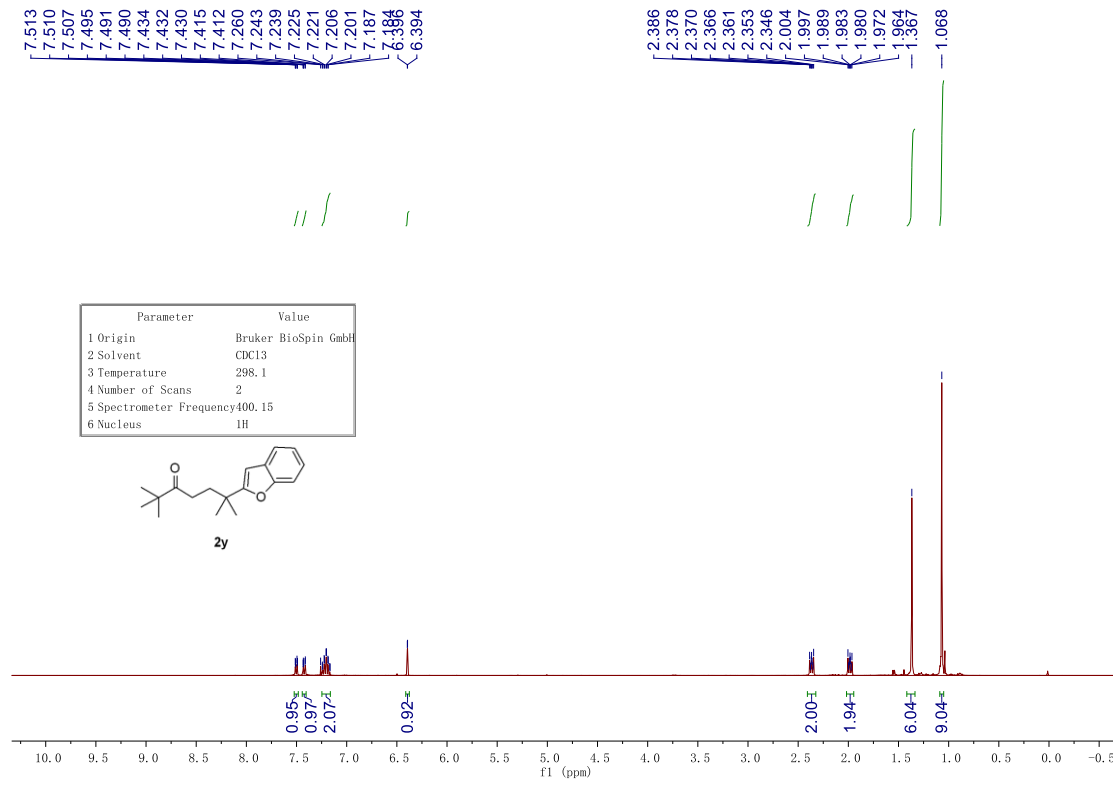

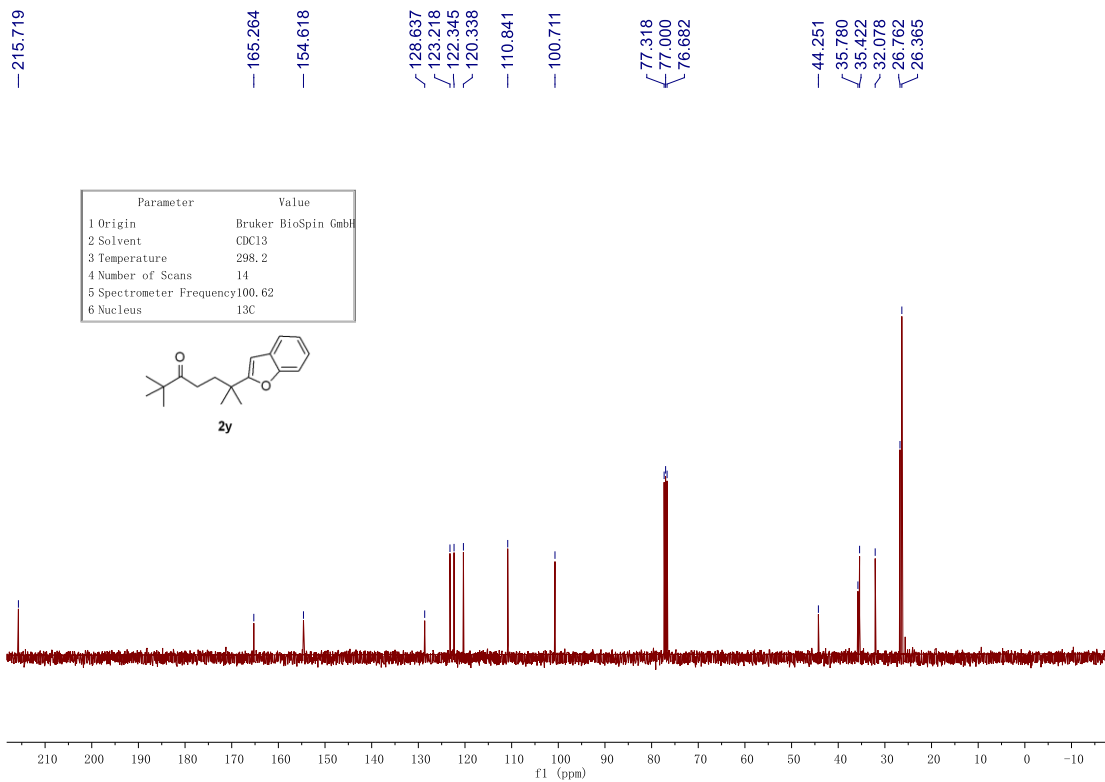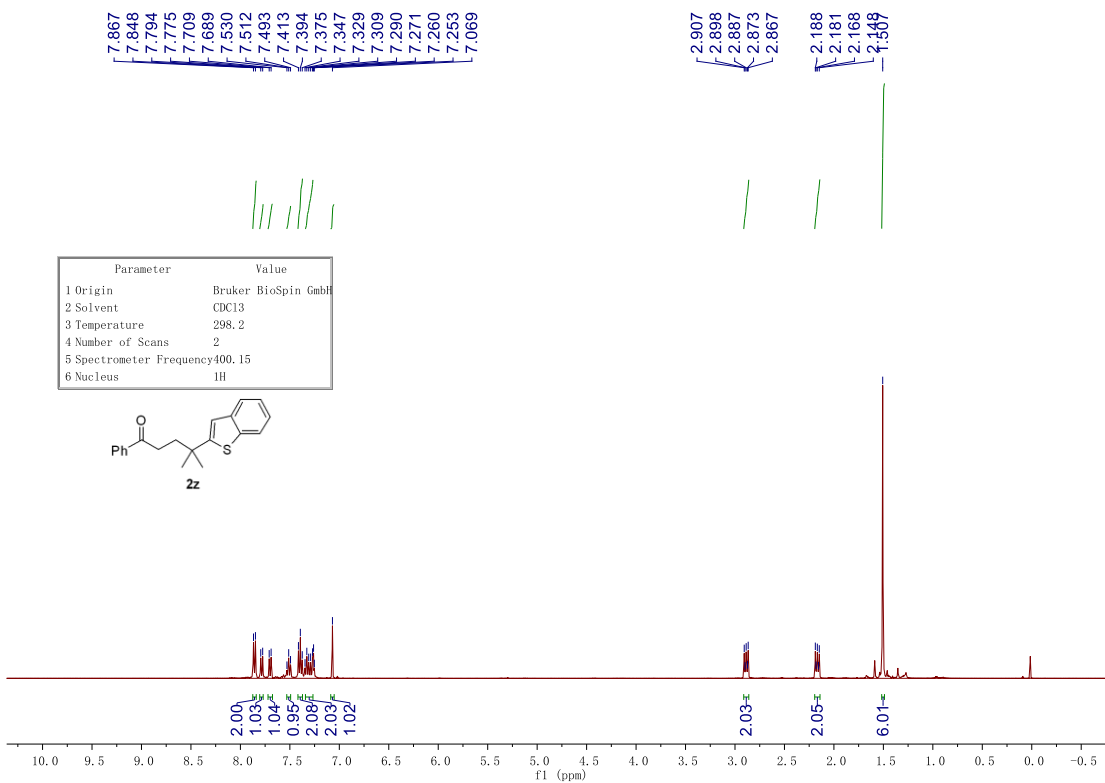

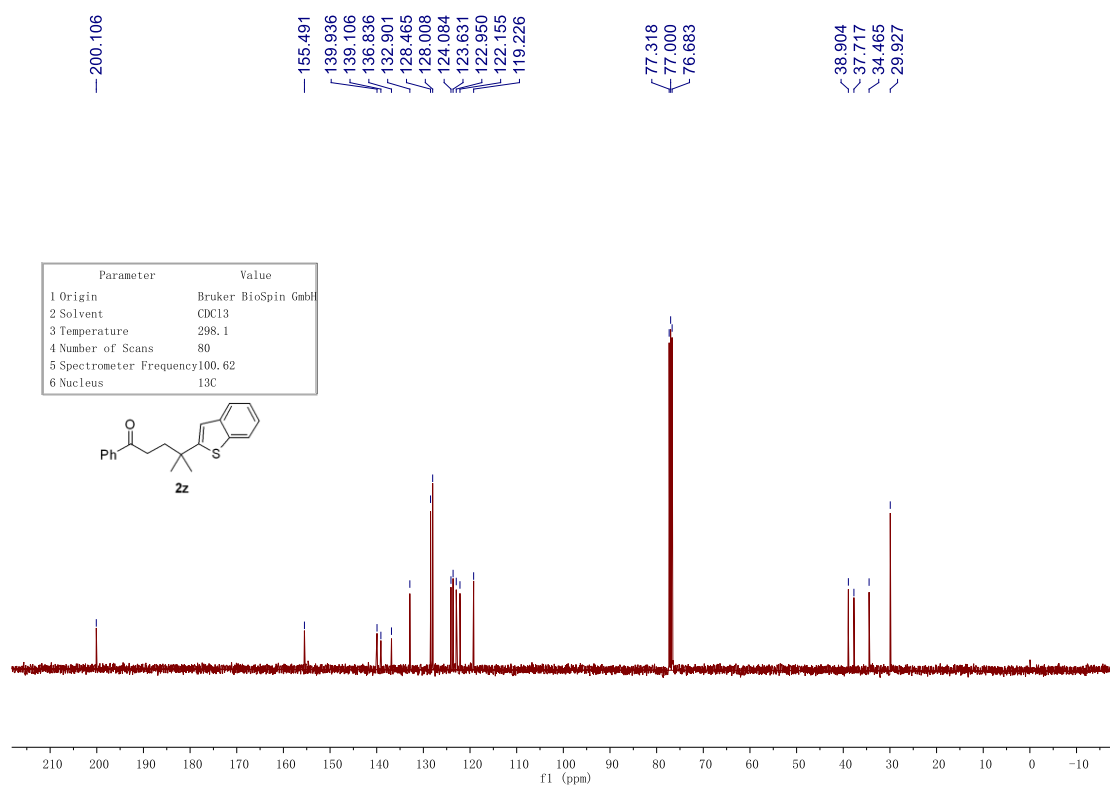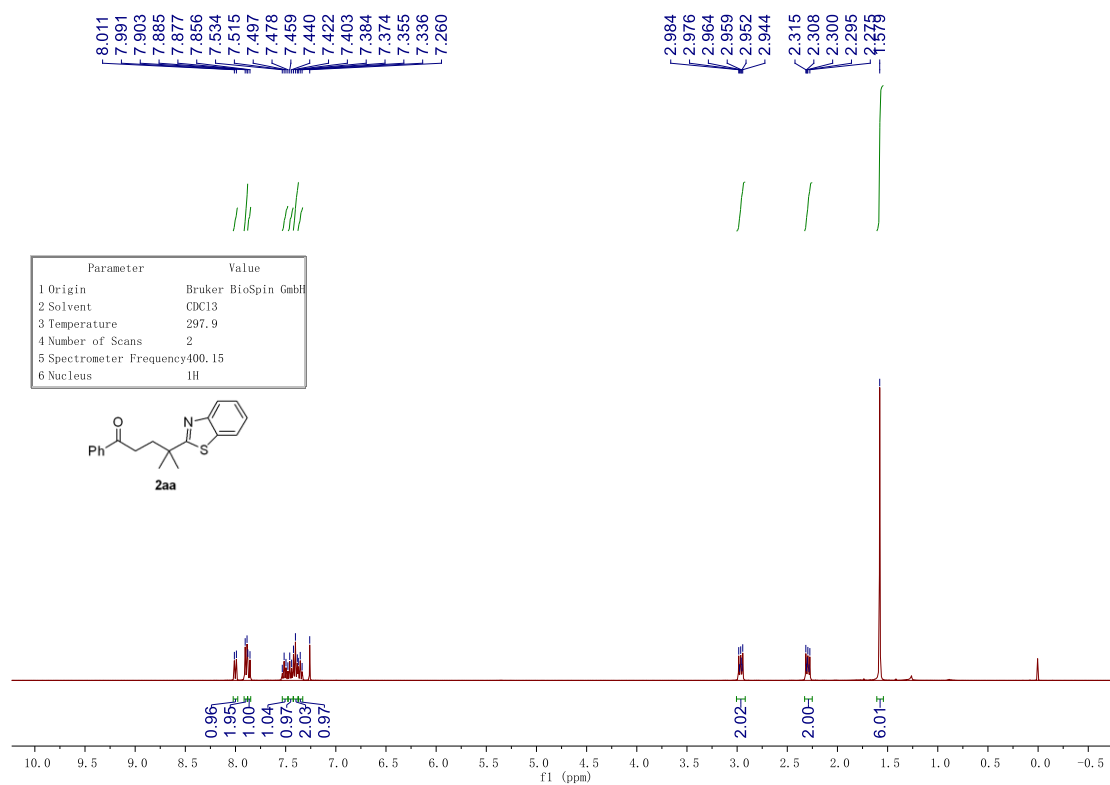

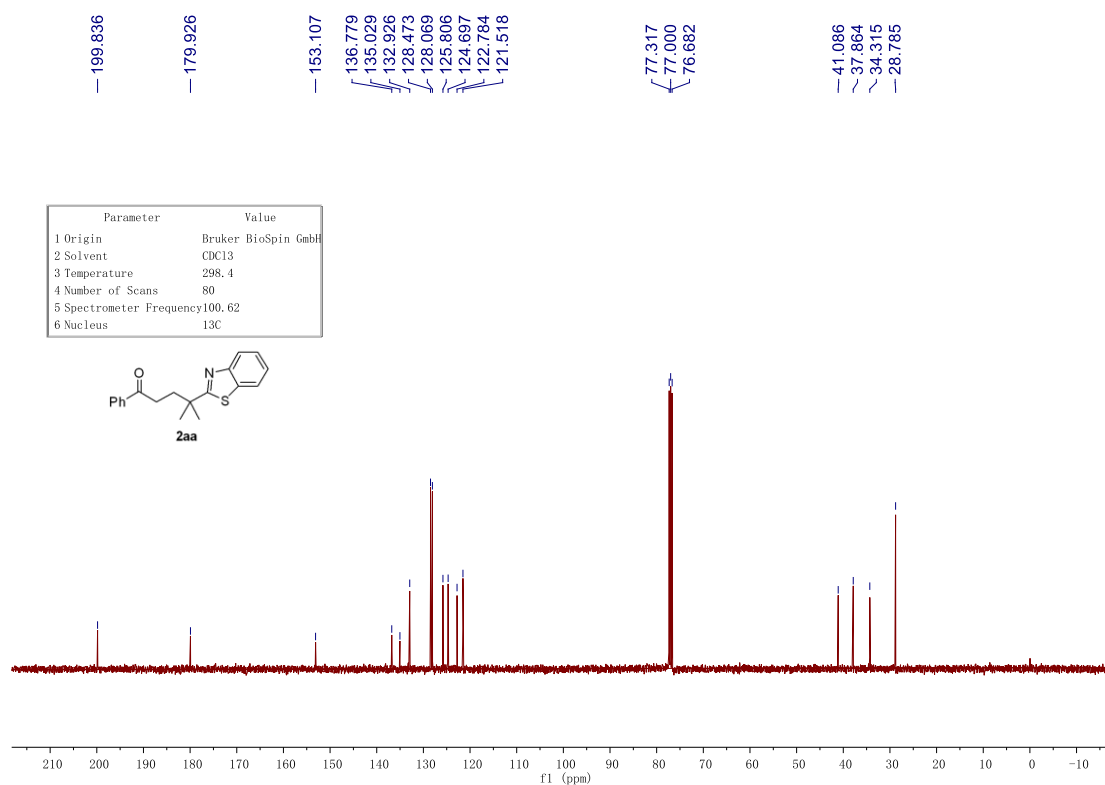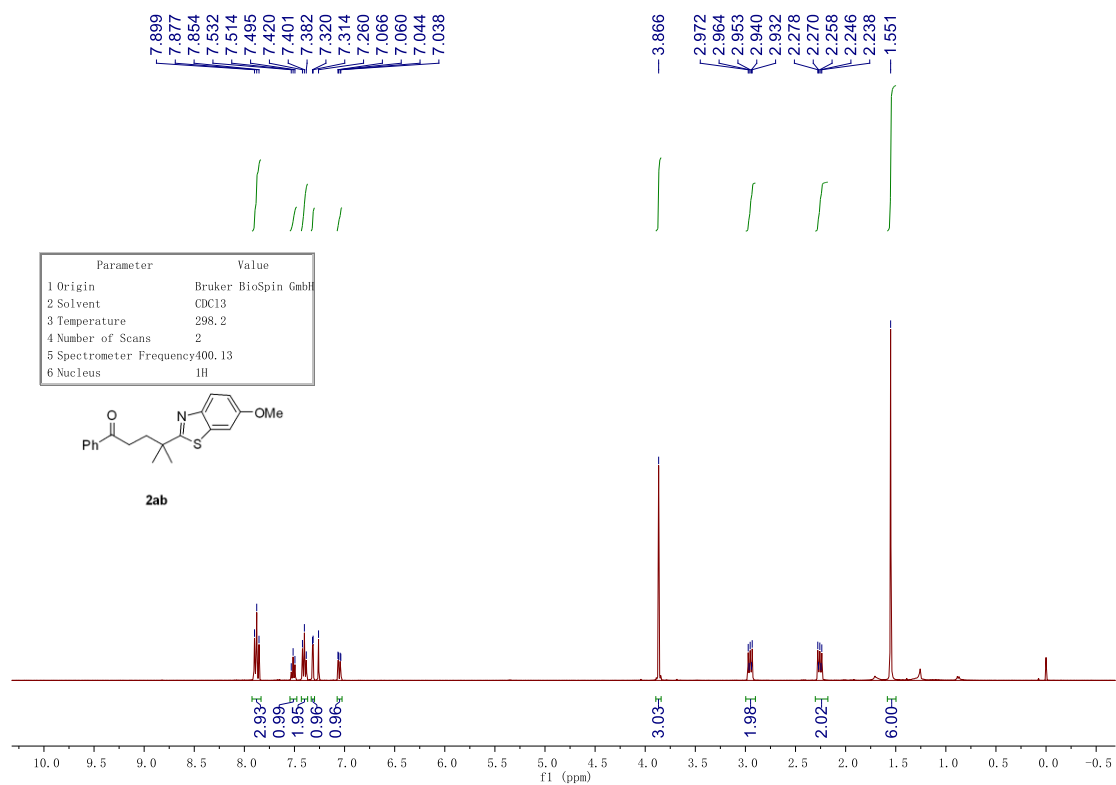



- 199.893
- 177.272
- 157.328
- 147.530
- 136.760
- 136.277
- 132.906
- 128.452
- 128.053
- 123.199
- 114.961
- 104.155
- 77.317
- 77.000
- 76.682
- 55.763
- 40.908
- 37.869
- 34.307
- 28.726

| Parameter                | Value               |
|--------------------------|---------------------|
| 1 Origin                 | Bruker BioSpin GmbH |
| 2 Solvent                | CDCl3               |
| 3 Temperature            | 298.2               |
| 4 Number of Scans        | 11                  |
| 5 Spectrometer Frequency | 100.61              |
| 6 Nucleus                | 13C                 |

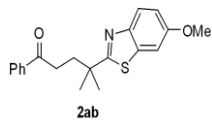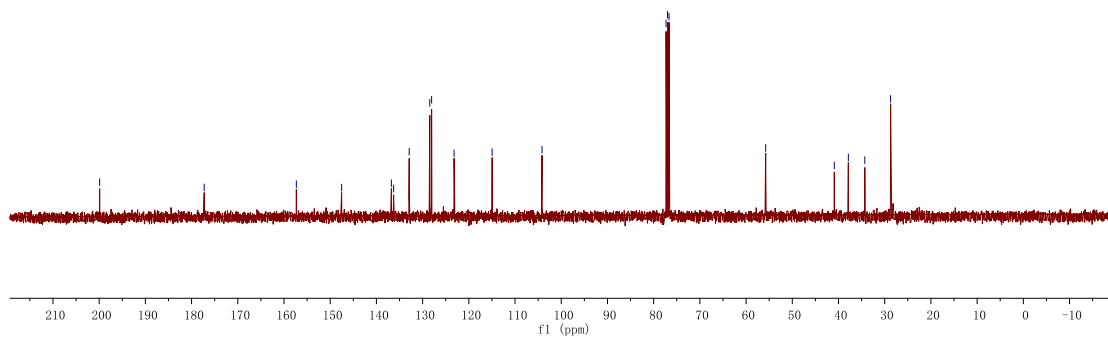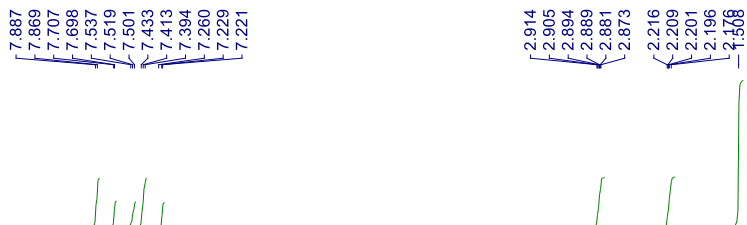

| Parameter                | Value               |
|--------------------------|---------------------|
| 1 Origin                 | Bruker BioSpin GmbH |
| 2 Solvent                | CDCl3               |
| 3 Temperature            | 297.9               |
| 4 Number of Scans        | 2                   |
| 5 Spectrometer Frequency | 400.15              |
| 6 Nucleus                | 1H                  |

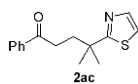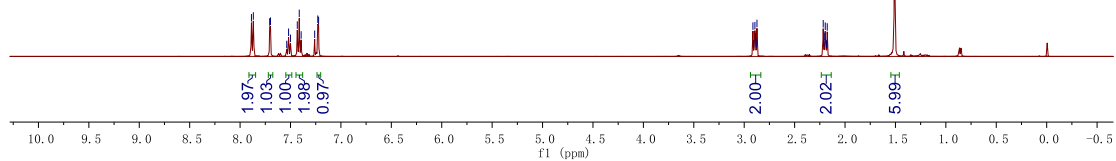

— 199.873  
 — 179.397  
 — 141.996  
 — 136.786  
 — 132.872  
 — 128.453  
 — 127.993  
 — 117.966  
 — 77.317  
 — 77.000  
 — 76.682  
 — 40.172  
 — 38.108  
 — 34.219  
 — 28.855

| Parameter                | Value               |
|--------------------------|---------------------|
| 1 Origin                 | Bruker BioSpin GmbH |
| 2 Solvent                | CDCl3               |
| 3 Temperature            | 298.2               |
| 4 Number of Scans        | 8                   |
| 5 Spectrometer Frequency | 100.62              |
| 6 Nucleus                | 13C                 |

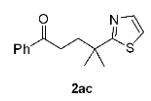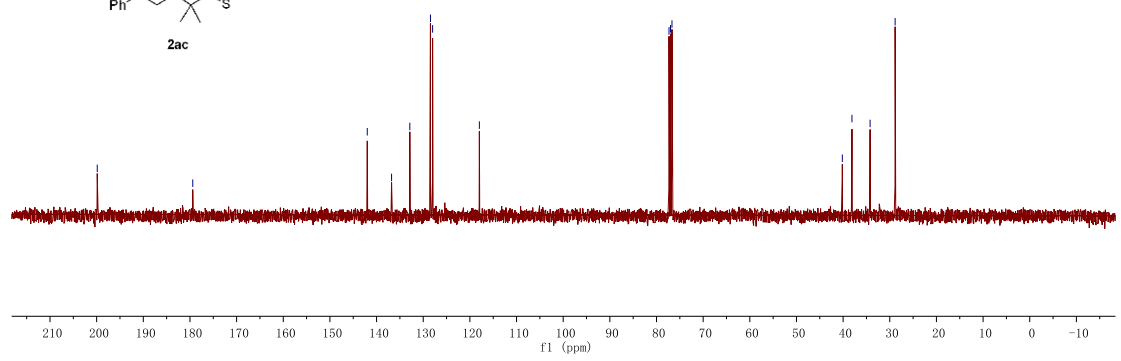

7.885  
 7.866  
 7.709  
 7.702  
 7.693  
 7.532  
 7.513  
 7.495  
 7.481  
 7.417  
 7.399  
 7.380  
 7.312  
 7.305  
 7.297  
 7.260  
 2.967  
 2.948  
 2.928  
 2.299  
 2.278  
 2.260  
 1.554

| Parameter                | Value               |
|--------------------------|---------------------|
| 1 Origin                 | Bruker BioSpin GmbH |
| 2 Solvent                | CDCl3               |
| 3 Temperature            | 298.2               |
| 4 Number of Scans        | 2                   |
| 5 Spectrometer Frequency | 400.15              |
| 6 Nucleus                | 1H                  |

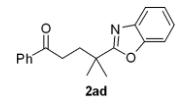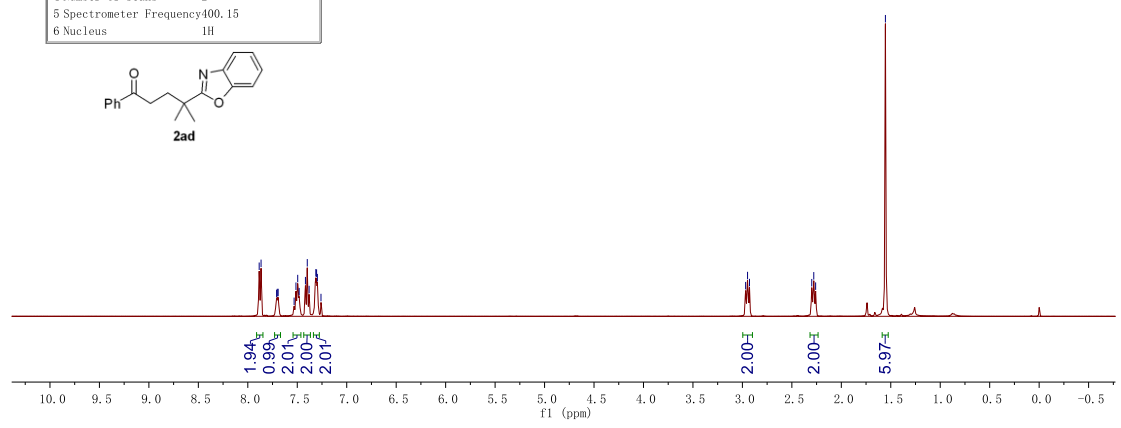

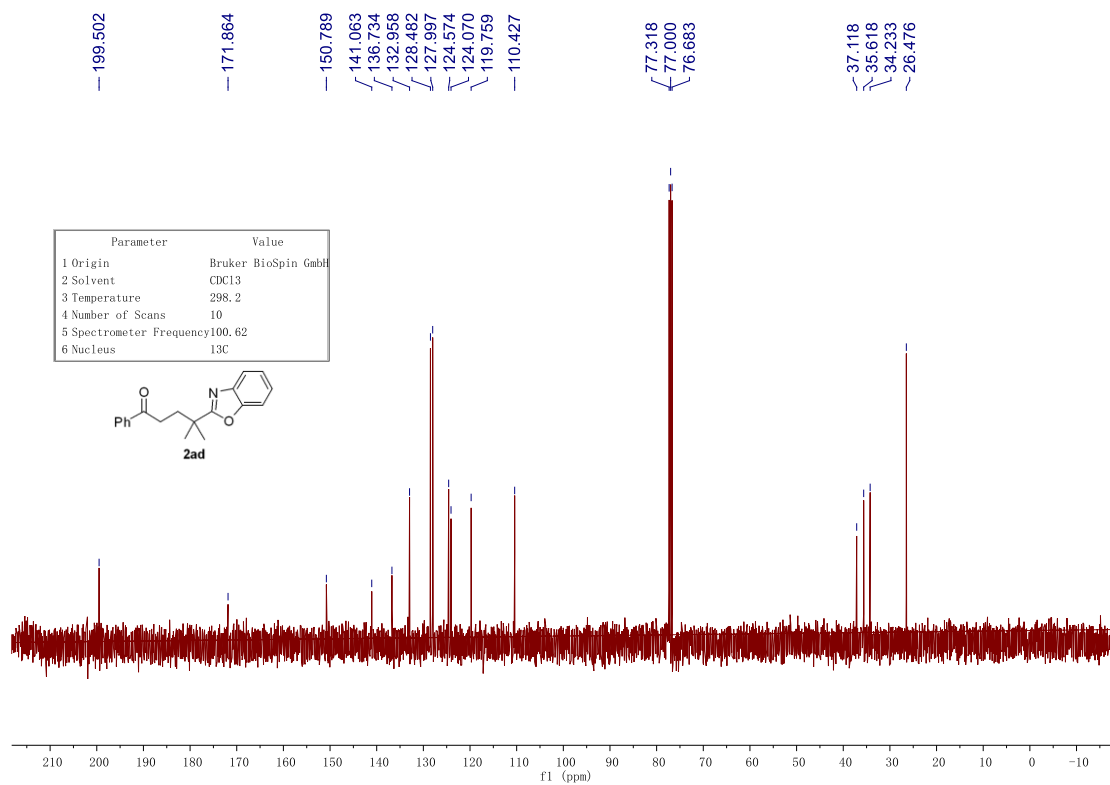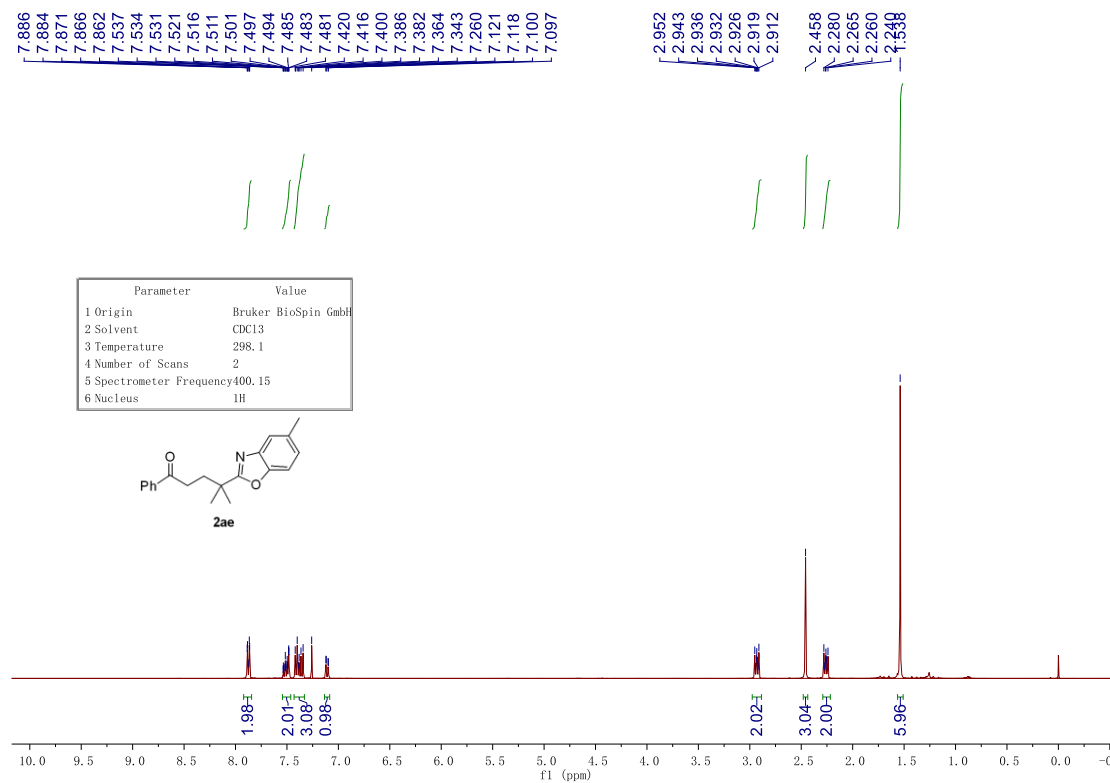

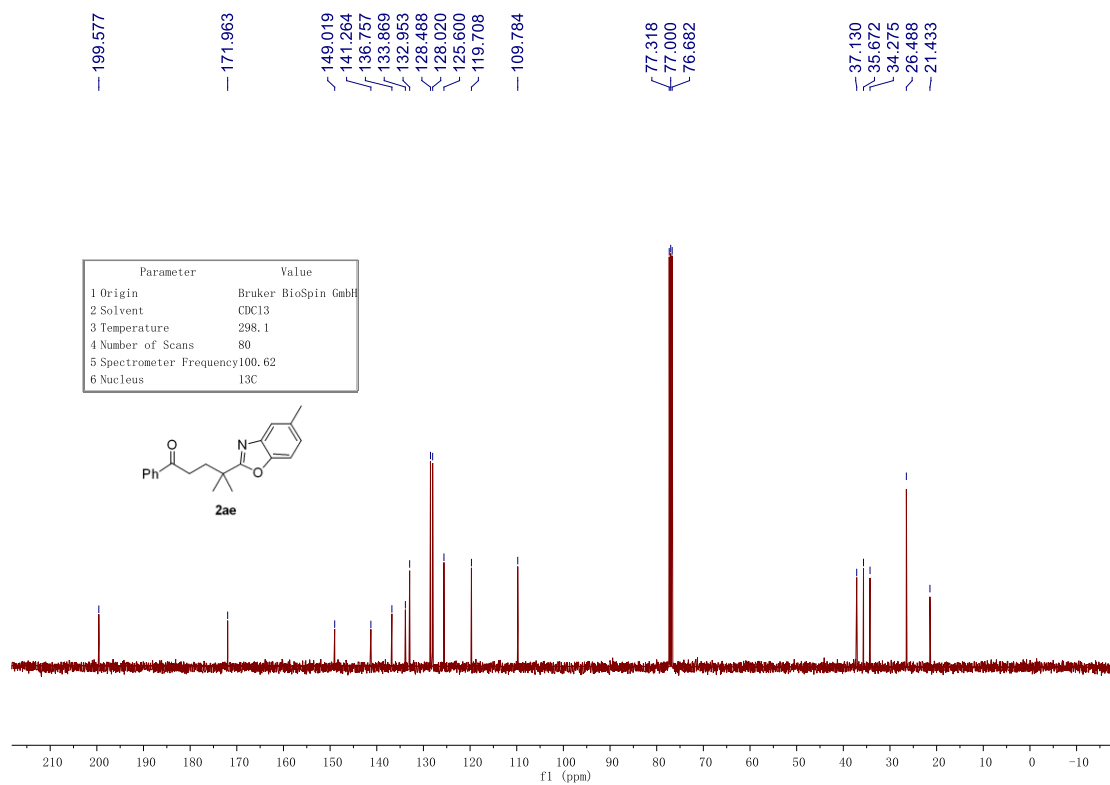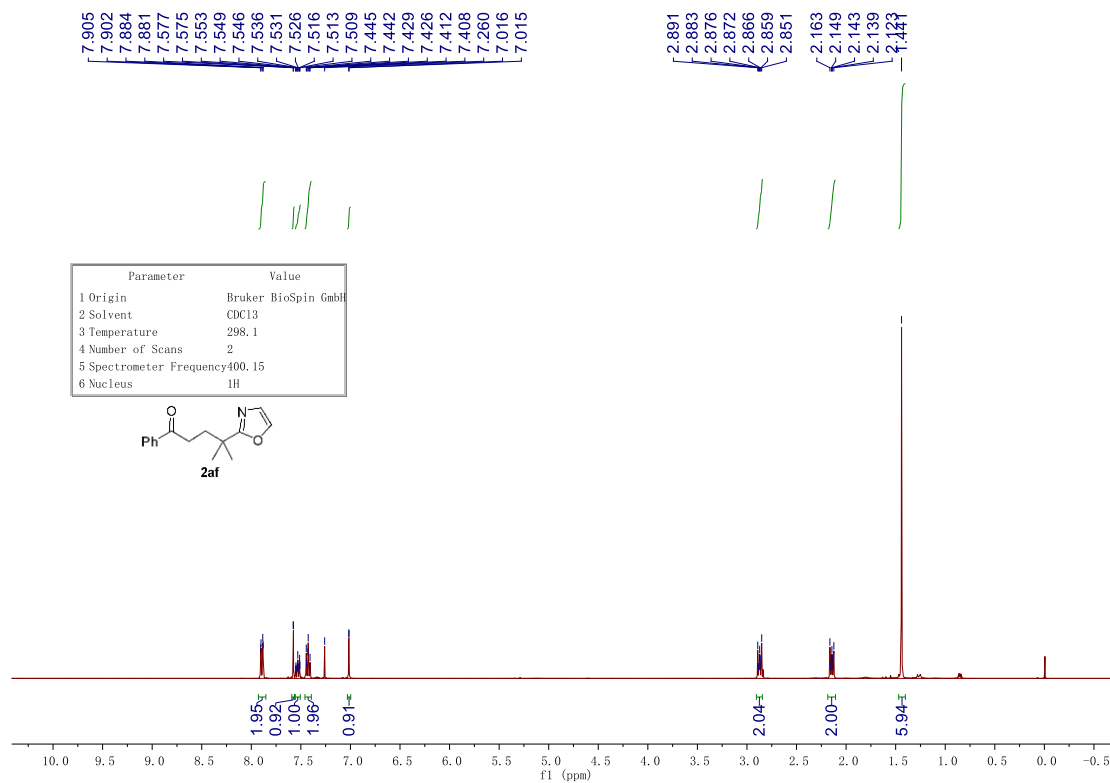

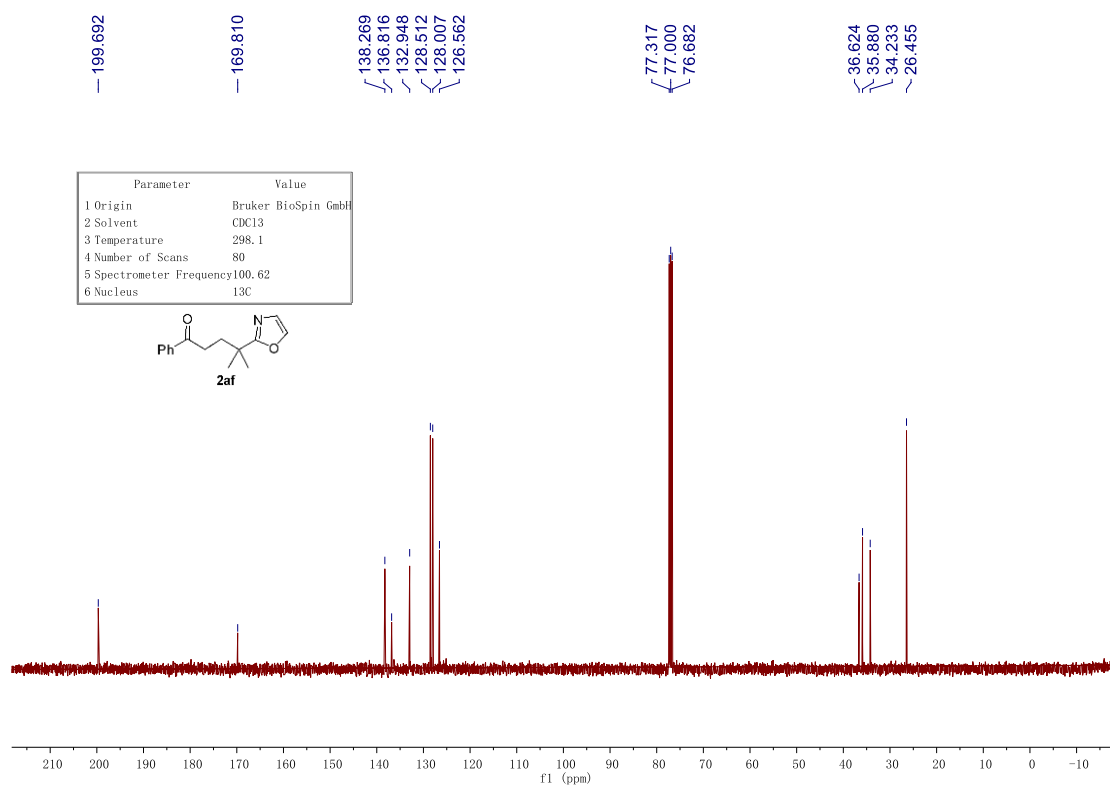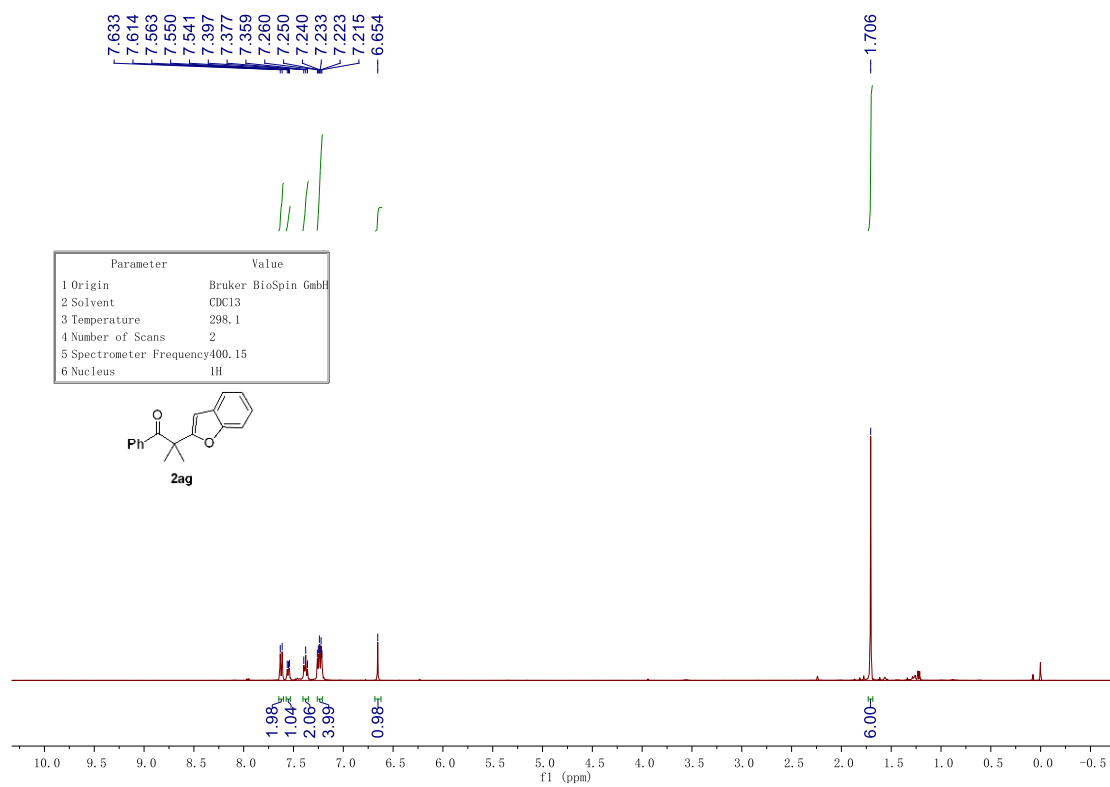

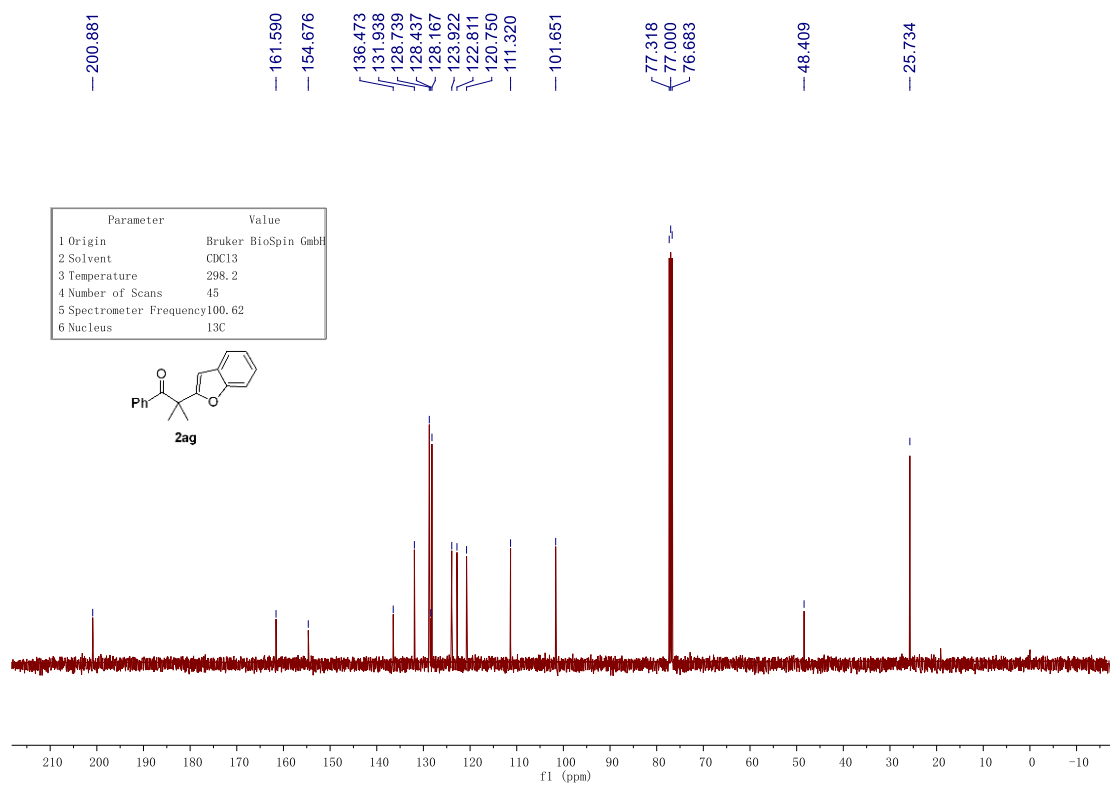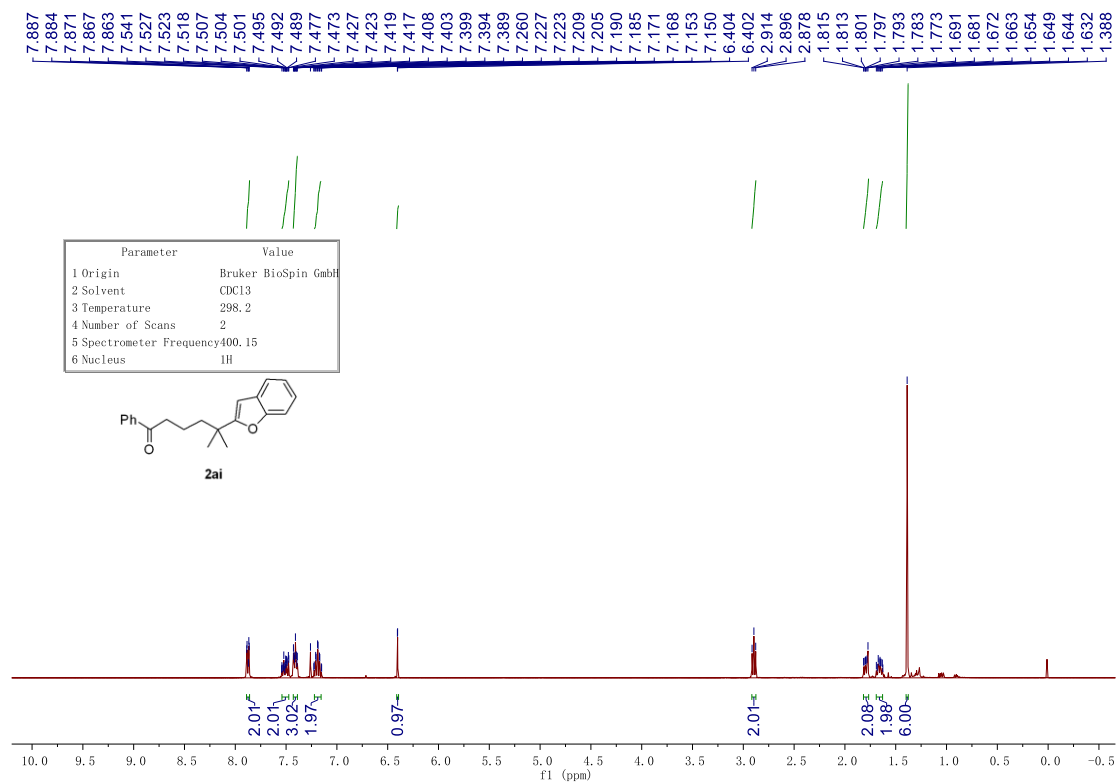

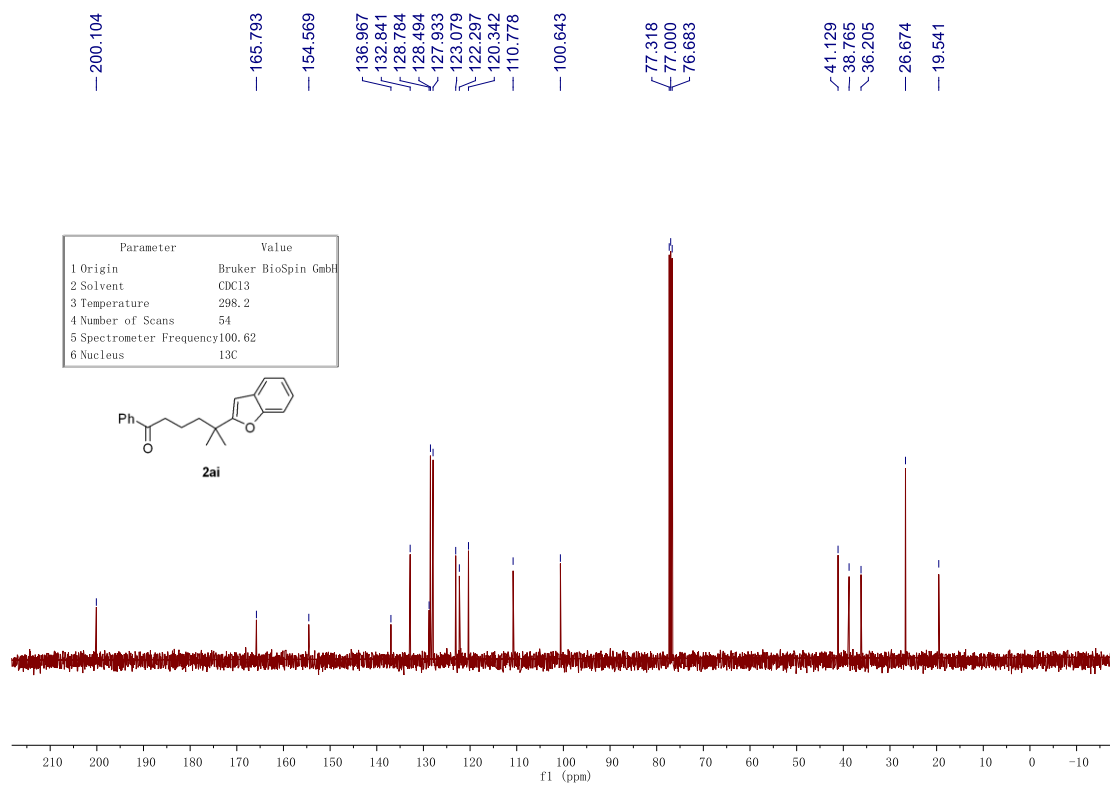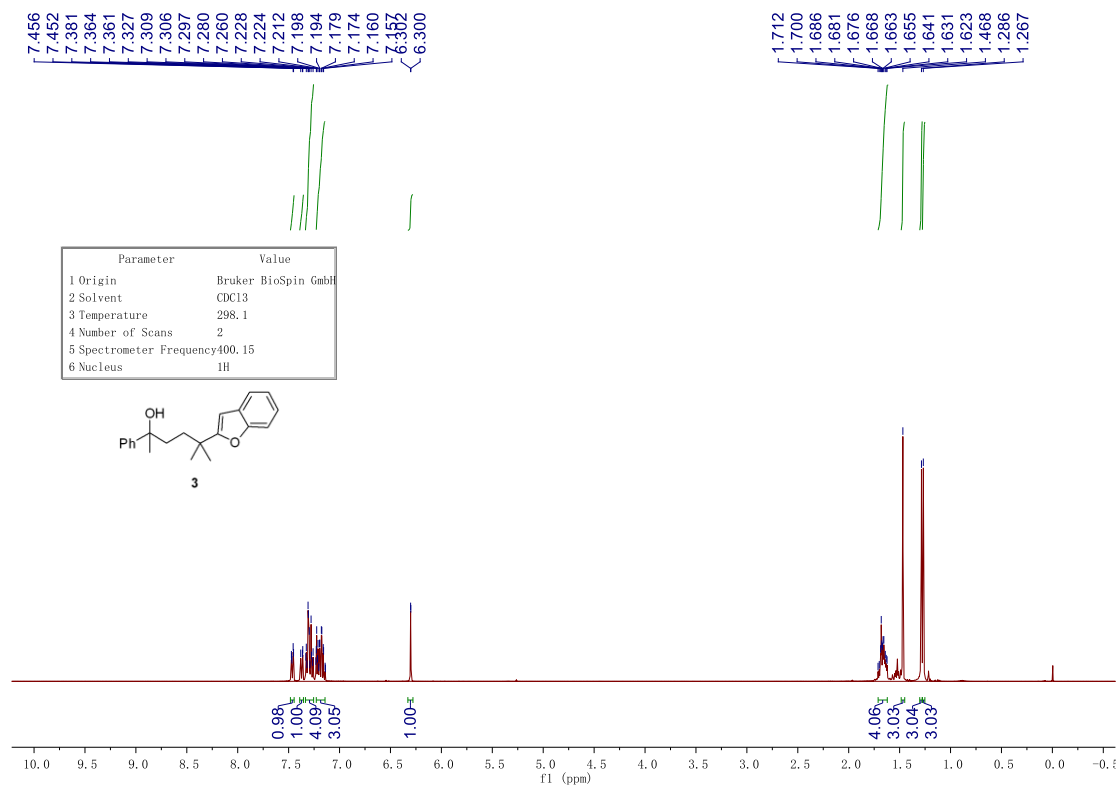

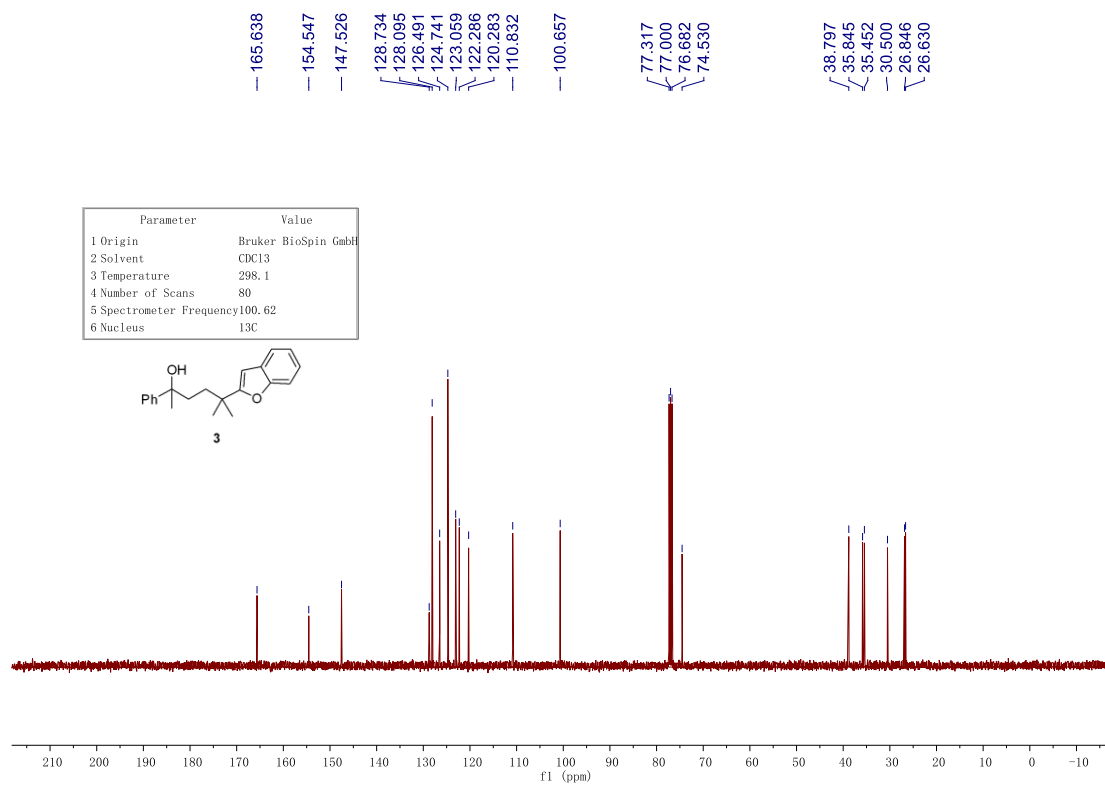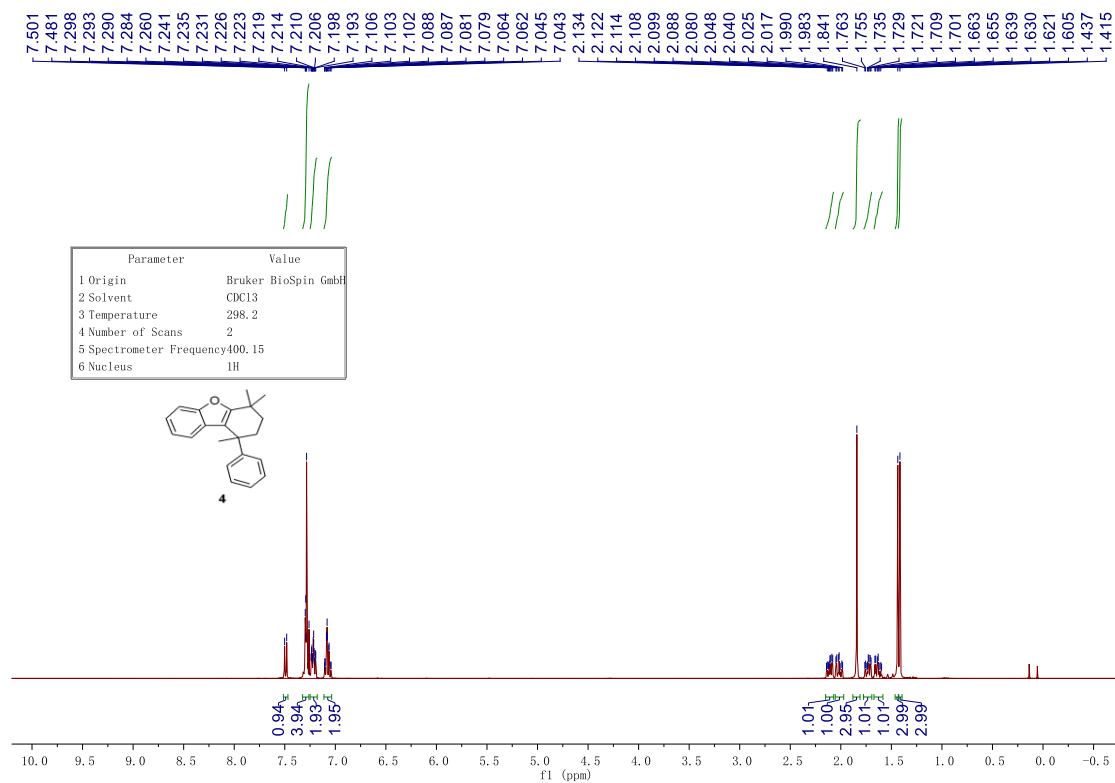



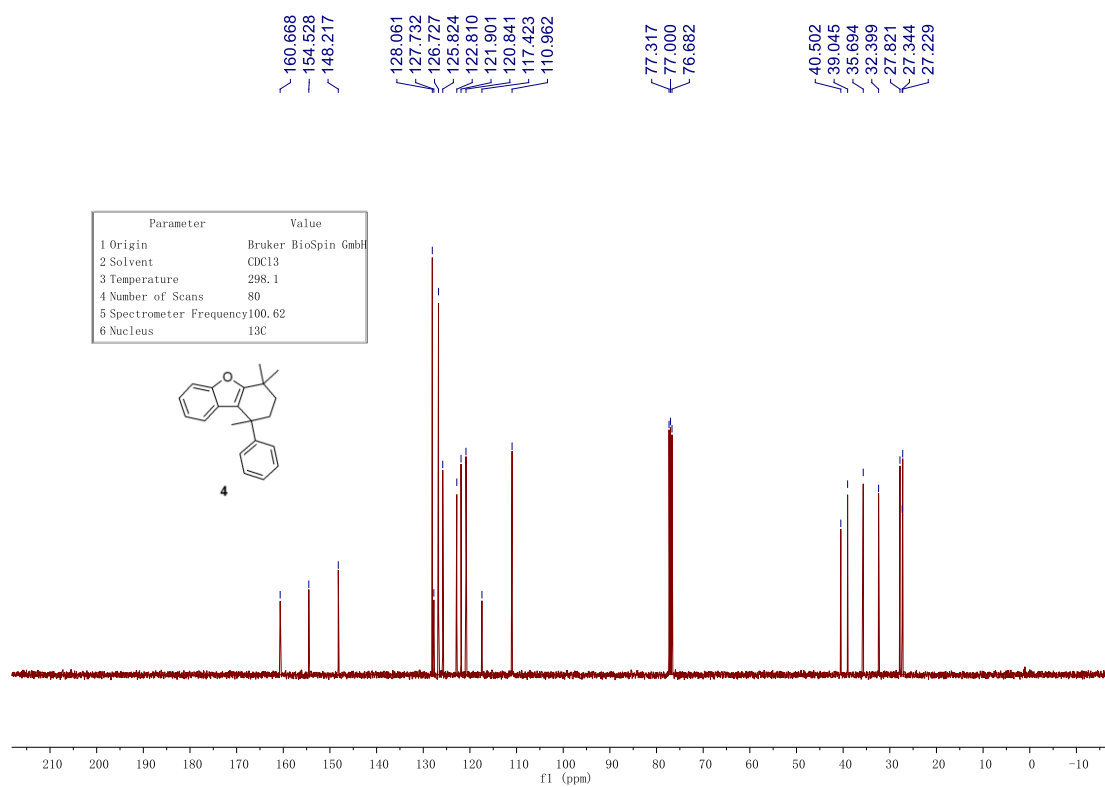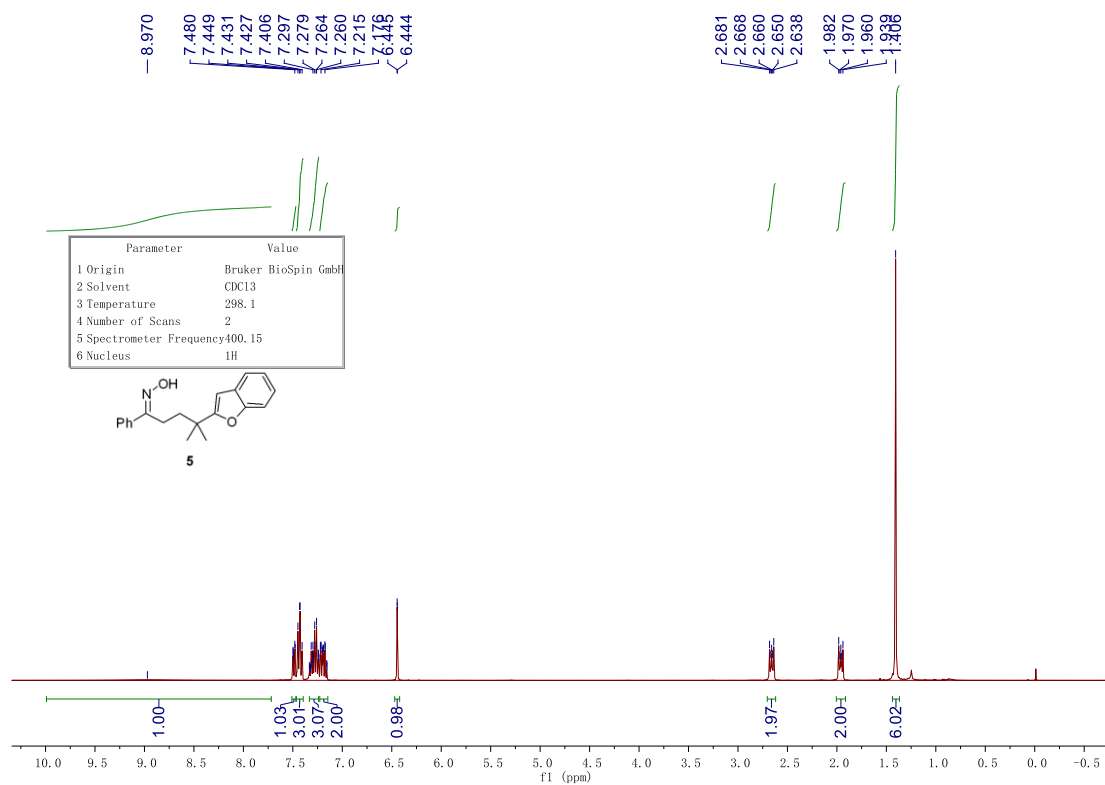

165.092  
159.451  
154.649  
135.322  
129.157  
128.723  
128.491  
128.095  
123.301  
122.415  
120.441  
110.774  
101.167  
77.318  
77.000  
76.682  
37.337  
36.512  
26.462  
21.987

| Parameter                | Value               |
|--------------------------|---------------------|
| 1 Origin                 | Bruker BioSpin GmbH |
| 2 Solvent                | CDCl3               |
| 3 Temperature            | 298.2               |
| 4 Number of Scans        | 30                  |
| 5 Spectrometer Frequency | 100.62              |
| 6 Nucleus                | 13C                 |

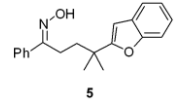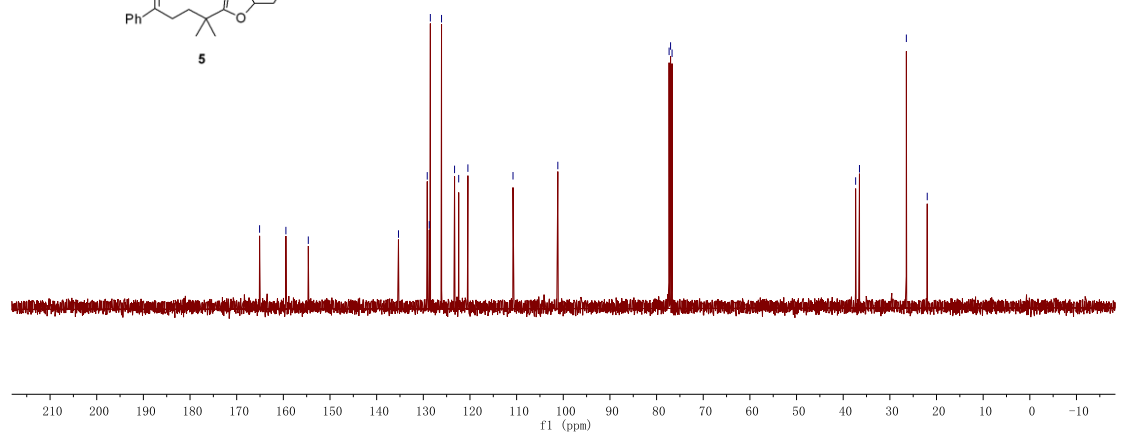

7.510  
7.493  
7.489  
7.435  
7.416  
7.295  
7.276  
7.260  
7.246  
7.242  
7.228  
7.224  
7.210  
7.206  
7.192  
7.189  
7.090  
7.071  
6.953  
2.216  
2.206  
2.195  
2.186  
2.173  
2.164  
2.143  
2.131  
2.121  
1.401

| Parameter                | Value               |
|--------------------------|---------------------|
| 1 Origin                 | Bruker BioSpin GmbH |
| 2 Solvent                | CDCl3               |
| 3 Temperature            | 298.2               |
| 4 Number of Scans        | 2                   |
| 5 Spectrometer Frequency | 400.13              |
| 6 Nucleus                | 1H                  |

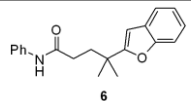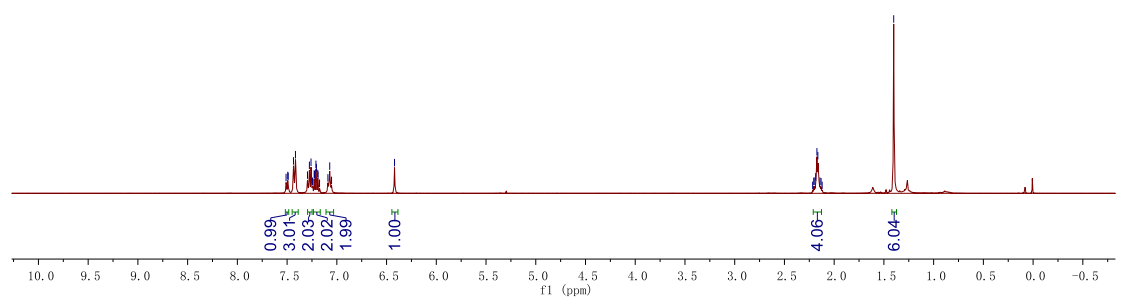

— 171.024  
 — 164.856  
 — 154.621  
 — 137.830  
 — 128.905  
 — 123.389  
 — 122.505  
 — 120.409  
 — 118.858  
 — 101.088  
 — 77.317  
 — 77.000  
 — 76.682  
 — 36.828  
 — 35.931  
 — 33.497  
 — 26.684

| Parameter                | Value               |
|--------------------------|---------------------|
| 1 Origin                 | Bruker BioSpin GmbH |
| 2 Solvent                | CDCl <sub>3</sub>   |
| 3 Temperature            | 298.1               |
| 4 Number of Scans        | 80                  |
| 5 Spectrometer Frequency | 100.62              |
| 6 Nucleus                | <sup>13</sup> C     |

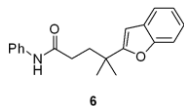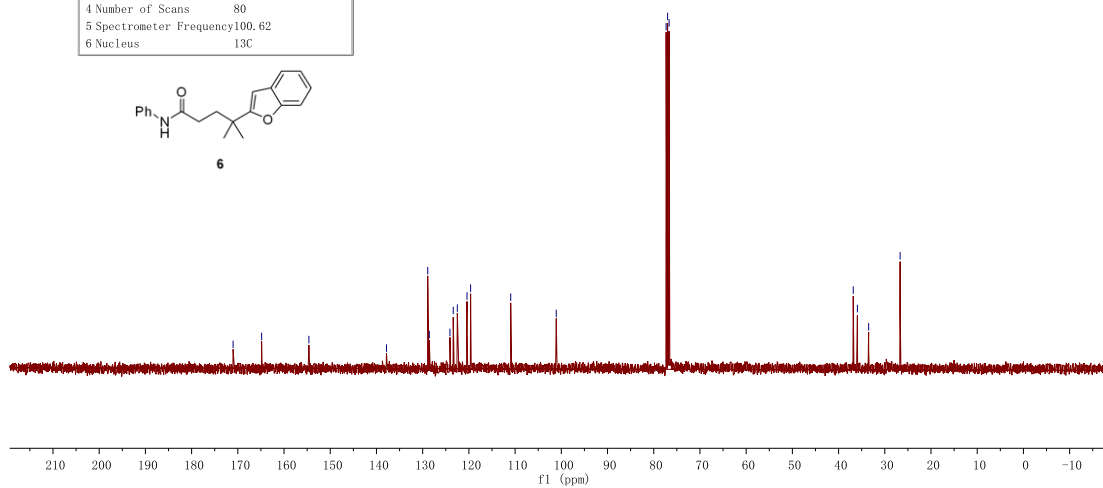

Supplement: d1qo01209f1.pdf [file d1qo01209f1.pdf]
